# Supplementary material for: Waning effectiveness of BNT162b2 and ChAdOx1 covid-19 vaccines over six months since second dose: OpenSAFELY cohort study using linked electronic health records
Source: PubMed Central journal article supplement (PMC10441183; doi:10.1136/bmj-2022-071249), 2022-07-20
Supplement: hore071249.ww1.pdf [file hore071249.ww1.pdf]

## Contents

|                                                                         |          |
|-------------------------------------------------------------------------|----------|
| <b>List of Tables</b>                                                   | <b>1</b> |
| <b>List of Figures</b>                                                  | <b>1</b> |
| <b>Supplementary Methods</b>                                            | <b>2</b> |
| <b>Supplementary Results</b>                                            | <b>8</b> |
| Study population . . . . .                                              | 8        |
| Attrition due to subsequent vaccination . . . . .                       | 18       |
| Distribution of follow-up time . . . . .                                | 19       |
| Waning vaccine effectiveness in risk-based subgroups . . . . .          | 22       |
| Waning vaccine effectiveness in risk- and sex-based subgroups . . . . . | 78       |
| Waning vaccine effectiveness in older adults . . . . .                  | 91       |

## List of Tables

|    |                                                                                                                                         |    |
|----|-----------------------------------------------------------------------------------------------------------------------------------------|----|
| 1  | Vaccination phases and priority groups for primary vaccination advised by the Joint Committee on Vaccination and Immunisation . . . . . | 2  |
| 2  | Eligibility dates for first vaccine dose . . . . .                                                                                      | 2  |
| 3  | Variable definitions . . . . .                                                                                                          | 4  |
| 4  | Additional characteristics summarised across subgroups. . . . .                                                                         | 17 |
| 5  | Event counts / person-years. . . . .                                                                                                    | 23 |
| 6  | Unadjusted hazard ratios for effect of vaccination. . . . .                                                                             | 24 |
| 7  | Adjusted hazard ratios for effect of vaccination. . . . .                                                                               | 25 |
| 8  | Per-comparison-period ratio of adjusted hazard ratios for effect of vaccination. . . . .                                                | 26 |
| 9  | Covariate hazard ratios for COVID-19 hospitalisation in the BNT162b2 vs unvaccinated comparison and the 65+ years subgroup. . . . .     | 35 |
| 10 | Covariate hazard ratios for COVID-19 death in the BNT162b2 vs unvaccinated comparison and the 65+ years subgroup. . . . .               | 36 |
| 11 | Covariate hazard ratios for Positive SARS-CoV-2 test in the BNT162b2 vs unvaccinated comparison and the 65+ years subgroup. . . . .     | 37 |
| 12 | Covariate hazard ratios for Non-COVID-19 death in the BNT162b2 vs unvaccinated comparison and the 65+ years subgroup. . . . .           | 38 |
| 13 | Covariate hazard ratios for Any SARS-CoV-2 test in the BNT162b2 vs unvaccinated comparison and the 65+ years subgroup. . . . .          | 39 |
| 14 | Covariate hazard ratios for COVID-19 hospitalisation in the ChAdOx1 vs unvaccinated comparison and the 65+ years subgroup. . . . .      | 40 |
| 15 | Covariate hazard ratios for COVID-19 death in the ChAdOx1 vs unvaccinated comparison and the 65+ years subgroup. . . . .                | 41 |
| 16 | Covariate hazard ratios for Positive SARS-CoV-2 test in the ChAdOx1 vs unvaccinated comparison and the 65+ years subgroup. . . . .      | 42 |
| 17 | Covariate hazard ratios for Non-COVID-19 death in the ChAdOx1 vs unvaccinated comparison and the 65+ years subgroup. . . . .            | 43 |
| 18 | Covariate hazard ratios for Any SARS-CoV-2 test in the ChAdOx1 vs unvaccinated comparison and the 65+ years subgroup. . . . .           | 44 |

|    |                                                                                                                                                                 |    |
|----|-----------------------------------------------------------------------------------------------------------------------------------------------------------------|----|
| 19 | Covariate hazard ratios for COVID-19 hospitalisation in the BNT162b2 vs ChAdOx1 comparison and the 65+ years subgroup. . . . .                                  | 45 |
| 20 | Covariate hazard ratios for COVID-19 death in the BNT162b2 vs ChAdOx1 comparison and the 65+ years subgroup. . . . .                                            | 46 |
| 21 | Covariate hazard ratios for Positive SARS-CoV-2 test in the BNT162b2 vs ChAdOx1 comparison and the 65+ years subgroup. . . . .                                  | 47 |
| 22 | Covariate hazard ratios for Non-COVID-19 death in the BNT162b2 vs ChAdOx1 comparison and the 65+ years subgroup. . . . .                                        | 48 |
| 23 | Covariate hazard ratios for Any SARS-CoV-2 test in the BNT162b2 vs ChAdOx1 comparison and the 65+ years subgroup. . . . .                                       | 49 |
| 24 | Covariate hazard ratios for COVID-19 hospitalisation in the BNT162b2 vs unvaccinated comparison and the 18-64 years and clinically vulnerable subgroup. . . . . | 50 |
| 25 | Covariate hazard ratios for COVID-19 death in the BNT162b2 vs unvaccinated comparison and the 18-64 years and clinically vulnerable subgroup. . . . .           | 51 |
| 26 | Covariate hazard ratios for Positive SARS-CoV-2 test in the BNT162b2 vs unvaccinated comparison and the 18-64 years and clinically vulnerable subgroup. . . . . | 52 |
| 27 | Covariate hazard ratios for Non-COVID-19 death in the BNT162b2 vs unvaccinated comparison and the 18-64 years and clinically vulnerable subgroup. . . . .       | 53 |
| 28 | Covariate hazard ratios for Any SARS-CoV-2 test in the BNT162b2 vs unvaccinated comparison and the 18-64 years and clinically vulnerable subgroup. . . . .      | 54 |
| 29 | Covariate hazard ratios for COVID-19 hospitalisation in the ChAdOx1 vs unvaccinated comparison and the 18-64 years and clinically vulnerable subgroup. . . . .  | 55 |
| 30 | Covariate hazard ratios for COVID-19 death in the ChAdOx1 vs unvaccinated comparison and the 18-64 years and clinically vulnerable subgroup. . . . .            | 56 |
| 31 | Covariate hazard ratios for Positive SARS-CoV-2 test in the ChAdOx1 vs unvaccinated comparison and the 18-64 years and clinically vulnerable subgroup. . . . .  | 57 |
| 32 | Covariate hazard ratios for Non-COVID-19 death in the ChAdOx1 vs unvaccinated comparison and the 18-64 years and clinically vulnerable subgroup. . . . .        | 58 |
| 33 | Covariate hazard ratios for Any SARS-CoV-2 test in the ChAdOx1 vs unvaccinated comparison and the 18-64 years and clinically vulnerable subgroup. . . . .       | 59 |
| 34 | Covariate hazard ratios for COVID-19 hospitalisation in the BNT162b2 vs ChAdOx1 comparison and the 18-64 years and clinically vulnerable subgroup. . . . .      | 60 |
| 35 | Covariate hazard ratios for COVID-19 death in the BNT162b2 vs ChAdOx1 comparison and the 18-64 years and clinically vulnerable subgroup. . . . .                | 61 |
| 36 | Covariate hazard ratios for Positive SARS-CoV-2 test in the BNT162b2 vs ChAdOx1 comparison and the 18-64 years and clinically vulnerable subgroup. . . . .      | 62 |
| 37 | Covariate hazard ratios for Non-COVID-19 death in the BNT162b2 vs ChAdOx1 comparison and the 18-64 years and clinically vulnerable subgroup. . . . .            | 63 |
| 38 | Covariate hazard ratios for Any SARS-CoV-2 test in the BNT162b2 vs ChAdOx1 comparison and the 18-64 years and clinically vulnerable subgroup. . . . .           | 64 |
| 39 | Covariate hazard ratios for Positive SARS-CoV-2 test in the BNT162b2 vs unvaccinated comparison and the 40-64 years subgroup. . . . .                           | 65 |
| 40 | Covariate hazard ratios for Any SARS-CoV-2 test in the BNT162b2 vs unvaccinated comparison and the 40-64 years subgroup. . . . .                                | 66 |
| 41 | Covariate hazard ratios for COVID-19 hospitalisation in the ChAdOx1 vs unvaccinated comparison and the 40-64 years subgroup. . . . .                            | 67 |
| 42 | Covariate hazard ratios for COVID-19 death in the ChAdOx1 vs unvaccinated comparison and the 40-64 years subgroup. . . . .                                      | 68 |
| 43 | Covariate hazard ratios for Positive SARS-CoV-2 test in the ChAdOx1 vs unvaccinated comparison and the 40-64 years subgroup. . . . .                            | 69 |

|    |                                                                                                                                       |    |
|----|---------------------------------------------------------------------------------------------------------------------------------------|----|
| 44 | Covariate hazard ratios for Non-COVID-19 death in the ChAdOx1 vs unvaccinated comparison and the 40-64 years subgroup. . . . .        | 70 |
| 45 | Covariate hazard ratios for Any SARS-CoV-2 test in the ChAdOx1 vs unvaccinated comparison and the 40-64 years subgroup. . . . .       | 71 |
| 46 | Covariate hazard ratios for Positive SARS-CoV-2 test in the BNT162b2 vs ChAdOx1 comparison and the 40-64 years subgroup. . . . .      | 72 |
| 47 | Covariate hazard ratios for Any SARS-CoV-2 test in the BNT162b2 vs ChAdOx1 comparison and the 40-64 years subgroup. . . . .           | 73 |
| 48 | Covariate hazard ratios for COVID-19 hospitalisation in the BNT162b2 vs unvaccinated comparison and the 18-39 years subgroup. . . . . | 74 |
| 49 | Covariate hazard ratios for Positive SARS-CoV-2 test in the BNT162b2 vs unvaccinated comparison and the 18-39 years subgroup. . . . . | 76 |
| 50 | Covariate hazard ratios for Any SARS-CoV-2 test in the BNT162b2 vs unvaccinated comparison and the 18-39 years subgroup. . . . .      | 77 |
| 51 | Event counts / person-years (females only). . . . .                                                                                   | 79 |
| 52 | Event counts / person-years (males only). . . . .                                                                                     | 80 |
| 53 | Unadjusted hazard ratios for effect of vaccination (female-only model). . . . .                                                       | 81 |
| 54 | Unadjusted hazard ratios for effect of vaccination (male-only model). . . . .                                                         | 82 |
| 55 | Adjusted hazard ratios for effect of vaccination (female-only model). . . . .                                                         | 83 |
| 56 | Adjusted hazard ratios for effect of vaccination (male-only model). . . . .                                                           | 84 |
| 57 | Per-comparison-period ratio of adjusted hazard ratios for effect of vaccination (female-only model). . . . .                          | 85 |
| 58 | Per-comparison-period ratio of adjusted hazard ratios for effect of vaccination (male-only model). . . . .                            | 86 |
| 59 | Event counts / person-years (older adults). . . . .                                                                                   | 91 |
| 60 | Unadjusted hazard ratios for effect of vaccination (older adults). . . . .                                                            | 92 |
| 61 | Adjusted hazard ratios for effect of vaccination (older adults). . . . .                                                              | 93 |
| 62 | Per-comparison-period ratio of adjusted hazard ratios for effect of vaccination (older adults). . . . .                               | 93 |

**List of Figures**

|    |                                                                            |    |
|----|----------------------------------------------------------------------------|----|
| 1  | Study eligibility criteria. . . . .                                        | 7  |
| 2  | Flow of individuals into study . . . . .                                   | 8  |
| 3  | Second vaccination period for JCVI group 2 . . . . .                       | 9  |
| 4  | Second vaccination period for JCVI group 3 . . . . .                       | 9  |
| 5  | Second vaccination period for JCVI group 4 . . . . .                       | 10 |
| 6  | Second vaccination period for JCVI group 4 . . . . .                       | 10 |
| 7  | Second vaccination period for JCVI group 5 . . . . .                       | 11 |
| 8  | Second vaccination period for JCVI group 6 . . . . .                       | 11 |
| 9  | Second vaccination period for JCVI group 7 and aged 64 years . . . . .     | 12 |
| 10 | Second vaccination period for JCVI group 7 and aged 60-63 years . . . . .  | 12 |
| 11 | Second vaccination period for JCVI group 8 . . . . .                       | 13 |
| 12 | Second vaccination period for JCVI group 9 . . . . .                       | 13 |
| 13 | Second vaccination period for JCVI group 10 and aged 45-49 years . . . . . | 14 |
| 14 | Second vaccination period for JCVI group 10 and aged 40-44 years . . . . . | 14 |

|    |                                                                                                                                                                                                                                                                                                                                                              |    |
|----|--------------------------------------------------------------------------------------------------------------------------------------------------------------------------------------------------------------------------------------------------------------------------------------------------------------------------------------------------------------|----|
| 15 | Second vaccination period for JCVI group 11 and aged 36-39 years . . . . .                                                                                                                                                                                                                                                                                   | 15 |
| 16 | Second vaccination period for JCVI group 11 and aged 30-35 years . . . . .                                                                                                                                                                                                                                                                                   | 15 |
| 17 | Second vaccination period for JCVI group 12 and aged 25-29 years . . . . .                                                                                                                                                                                                                                                                                   | 16 |
| 18 | Second vaccination period for JCVI group 12 and aged 18-24 years . . . . .                                                                                                                                                                                                                                                                                   | 16 |
| 19 | Cumulative incidence of subsequent vaccination. *And not clinically vulnerable. . . . .                                                                                                                                                                                                                                                                      | 18 |
| 20 | Distribution of follow-up time across the six comparison periods in the 65+ years subgroup. Comparison periods (numeric labels on right-hand side of plots) correspond to the following weeks since second vaccine dose: 1 = 3-6 weeks; 2 = 7-10 weeks; 3: 11-14 weeks; 4: 15-18 weeks; 5: 19-22 weeks; 6 = 23-26 weeks. . . . .                             | 19 |
| 21 | Distribution of follow-up time across the six comparison periods in the 18-64 years and clinically vulnerable subgroup. Comparison periods (numeric labels on right-hand side of plots) correspond to the following weeks since second vaccine dose: 1 = 3-6 weeks; 2 = 7-10 weeks; 3: 11-14 weeks; 4: 15-18 weeks; 5: 19-22 weeks; 6 = 23-26 weeks. . . . . | 20 |
| 22 | Distribution of follow-up time across the six comparison periods in the 40-64 years subgroup. Comparison periods (numeric labels on right-hand side of plots) correspond to the following weeks since second vaccine dose: 1 = 3-6 weeks; 2 = 7-10 weeks; 3: 11-14 weeks; 4: 15-18 weeks; 5: 19-22 weeks; 6 = 23-26 weeks. . . . .                           | 21 |
| 23 | Distribution of follow-up time across the six comparison periods in the 18-39 years subgroup. Comparison periods (numeric labels on right-hand side of plots) correspond to the following weeks since second vaccine dose: 1 = 3-6 weeks; 2 = 7-10 weeks; 3: 11-14 weeks; 4: 15-18 weeks; 5: 19-22 weeks; 6 = 23-26 weeks. . . . .                           | 22 |
| 24 | Unadjusted and adjusted hazard ratios for BNT162b2 vs unvaccinated . . . . .                                                                                                                                                                                                                                                                                 | 27 |
| 25 | Unadjusted and adjusted hazard ratios for ChAdOx1 vs unvaccinated . . . . .                                                                                                                                                                                                                                                                                  | 28 |
| 26 | Unadjusted and adjusted hazard ratios for BNT162b2 vs ChAdOx1 . . . . .                                                                                                                                                                                                                                                                                      | 29 |
| 27 | Unadjusted and adjusted hazard ratios for any SARS-CoV-2 test for BNT162b2 vs unvaccinated . . . . .                                                                                                                                                                                                                                                         | 30 |
| 28 | Unadjusted and adjusted hazard ratios for any SARS-CoV-2 test for ChAdOx1 vs unvaccinated . . . . .                                                                                                                                                                                                                                                          | 31 |
| 29 | Unadjusted and adjusted hazard ratios for any SARS-CoV-2 test for BNT162b2 vs ChAdOx1 . . . . .                                                                                                                                                                                                                                                              | 32 |
| 30 | Adjusted hazard ratios for any SARS-CoV-2 test for BNT162b2 and ChAdOx1 vs unvaccinated . . . . .                                                                                                                                                                                                                                                            | 33 |
| 31 | Adjusted hazard ratios for any SARS-CoV-2 test for BNT162b2 vs ChAdOx1 . . . . .                                                                                                                                                                                                                                                                             | 34 |
| 32 | Adjusted hazard ratios for BNT162b2 vs unvaccinated from the female- and male-only models. . . . .                                                                                                                                                                                                                                                           | 87 |
| 33 | Adjusted hazard ratios for ChAdOx1 vs unvaccinated from the female- and male-only models. . . . .                                                                                                                                                                                                                                                            | 88 |
| 34 | Adjusted hazard ratios for any SARS-CoV-2 test for BNT162b2 vs unvaccinated from the female- and male-only models. . . . .                                                                                                                                                                                                                                   | 89 |
| 35 | Adjusted hazard ratios for any SARS-CoV-2 test for ChAdOx1 vs unvaccinated from the female- and male-only models. . . . .                                                                                                                                                                                                                                    | 90 |
| 36 | Adjusted hazard ratios for BNT162b2 vs unvaccinated from the 65-74 years and 75+ years models. . . . .                                                                                                                                                                                                                                                       | 94 |
| 37 | Adjusted hazard ratios for ChAdOx1 vs unvaccinated from the 65-74 years and 75+ years models. . . . .                                                                                                                                                                                                                                                        | 95 |
| 38 | Adjusted hazard ratios for any SARS-CoV-2 test for BNT162b2 vs unvaccinated from the 65-74 years and 75+ years models. . . . .                                                                                                                                                                                                                               | 96 |
| 39 | Adjusted hazard ratios for any SARS-CoV-2 test for ChAdOx1 vs unvaccinated from the 65-74 years and 75+ years models. . . . .                                                                                                                                                                                                                                | 96 |

## Supplementary Methods

**Supplementary Table 1:** Vaccination phases and priority groups for primary vaccination advised by the Joint Committee on Vaccination and Immunisation

| Vaccination phase | Priority group | Risk group                                                       |
|-------------------|----------------|------------------------------------------------------------------|
| 1                 | 1              | Residents in a care home for older adults                        |
|                   |                | Staff in a care home for older adults                            |
|                   | 2              | All those 80 years of age and over                               |
|                   |                | Frontline health and social care workers                         |
|                   | 3              | All those 75 years of age and over                               |
|                   | 4a             | All those 70 years of age and over                               |
|                   | 4b             | Individuals aged 16 to 69 in a high risk group <sup>a</sup>      |
|                   | 5              | All those 65 years of age and over                               |
|                   | 6              | Individuals aged 16 to 65 years in an at-risk group <sup>a</sup> |
| 2                 | 7              | All those 60 years of age and over                               |
|                   | 8              | All those 55 years of age and over                               |
|                   | 9              | All those 50 years of age and over                               |
|                   | 10             | All those 40 years of age and over                               |
|                   | 11             | All those 30 years of age and over                               |
|                   | 12             | All those 18 years of age and over                               |

<sup>a</sup> See [COVID-19: the green book, chapter 14a](#) for definitions of the high-risk and at-risk groups.

**Supplementary Table 2:** Eligibility dates for first vaccine dose

| Grouped eligibility date | Exact eligibility date | JCVI groups | Age range | Reference              |
|--------------------------|------------------------|-------------|-----------|------------------------|
| 2020-12-08               | 2020-12-08             | 1, 2        | -         | <a href="#">source</a> |
| 2021-01-18               | 2021-01-18             | 3, 4a, 4b   | -         | <a href="#">source</a> |
| 2021-02-15               | 2021-02-15             | 5, 6        | -         | <a href="#">source</a> |
| 2021-02-22               | 2021-02-22             | 7           | 64        | <a href="#">source</a> |
| 2021-03-01               | 2021-03-01             | 7           | 60-63     | <a href="#">source</a> |
| 2021-03-08               | 2021-03-08             | 8           | 56-59     | <a href="#">source</a> |
|                          | 2021-03-09             | 8           | 55        | <a href="#">source</a> |
| 2021-03-19               | 2021-03-19             | 9           | 50-54     | <a href="#">source</a> |
| 2021-04-13               | 2021-04-13             | 10          | 45-49     | <a href="#">source</a> |
| 2021-04-26               | 2021-04-26             | 10          | 44        | <a href="#">source</a> |
|                          | 2021-04-27             | 10          | 42-43     | <a href="#">source</a> |
|                          | 2021-04-30             | 10          | 40-41     | <a href="#">source</a> |
| 2021-05-13               | 2021-05-13             | 11          | 38-39     | <a href="#">source</a> |
|                          | 2021-05-19             | 11          | 36-37     | <a href="#">source</a> |
| 2021-05-21               | 2021-05-21             | 11          | 34-35     | <a href="#">source</a> |
|                          | 2021-05-25             | 11          | 32-33     | <a href="#">source</a> |
|                          | 2021-05-26             | 11          | 30-31     | <a href="#">source</a> |
| 2021-06-08               | 2021-06-08             | 12          | 25-29     | <a href="#">source</a> |
| 2021-06-15               | 2021-06-15             | 12          | 23-24     | <a href="#">source</a> |
|                          | 2021-06-16             | 12          | 21-22     | <a href="#">source</a> |
|                          | 2021-06-18             | 12          | 18-20     | <a href="#">source</a> |

JCVI: Joint Committee on Vaccination and Immunisation

**Supplementary Table 3: Variable definitions**

| Name                                       | Description                                                                                                                                                                                                                                                                                                                                                                                                                                     | Encoding                                                                                      | Date defined                                                                                          |
|--------------------------------------------|-------------------------------------------------------------------------------------------------------------------------------------------------------------------------------------------------------------------------------------------------------------------------------------------------------------------------------------------------------------------------------------------------------------------------------------------------|-----------------------------------------------------------------------------------------------|-------------------------------------------------------------------------------------------------------|
| <b>Exclusion criteria</b>                  |                                                                                                                                                                                                                                                                                                                                                                                                                                                 |                                                                                               |                                                                                                       |
| Evidence of prior COVID-19 infection       | Date of code corresponding to COVID-19 hospitalisation, positive SARS-CoV-2 test, or probable COVID-19 code in GP record.                                                                                                                                                                                                                                                                                                                       | Date                                                                                          | First occurrence                                                                                      |
| End-of-life care pathway initiated         | Date of code corresponding to end-of-life care or midazolam injection used in end-of-life care in patient's record.                                                                                                                                                                                                                                                                                                                             | Date                                                                                          | First occurrence prior to SVP                                                                         |
| Resident in care home                      | Date of code corresponding to care home in patient's record.                                                                                                                                                                                                                                                                                                                                                                                    | Date                                                                                          | First occurrence prior to SVP                                                                         |
| Medically housebound                       | Date of most recent code corresponding to medically housebound patient's record, not superseded by a code indicating that the patient is no longer housebound.                                                                                                                                                                                                                                                                                  | Date                                                                                          | First occurrence prior to SVP                                                                         |
| <b>JCVI group definitions</b>              |                                                                                                                                                                                                                                                                                                                                                                                                                                                 |                                                                                               |                                                                                                       |
| Age                                        | -                                                                                                                                                                                                                                                                                                                                                                                                                                               | Numeric                                                                                       | 31 March 2021 for individuals eligible in phase 1 and 1 July 2021 for individuals eligible in phase 2 |
| High risk                                  | A code in the primary care record indicating that the patient was at high risk of developing complications from COVID-19, not superseded by a code indicating that they were at low or moderate risk.                                                                                                                                                                                                                                           | 0; 1.                                                                                         | 18 January 2021 (eligibility date for high risk individuals).                                         |
| At-risk                                    | A code corresponding to one or more of the following: severe obesity (BMI 40+ kg/m <sup>2</sup> ); learning disability including Down's syndrome; serious mental illness; chronic heart disease; chronic respiratory disease; chronic liver disease; chronic kidney disease; chronic neurological disease; diabetes; immunosuppressed (diagnosis of permanent immunosuppression or asplenia, or currently taking immunosuppressant medication). | 0; 1.                                                                                         | 15 February 2021 (eligibility date for at-risk individuals).                                          |
| <b>Strata</b>                              |                                                                                                                                                                                                                                                                                                                                                                                                                                                 |                                                                                               |                                                                                                       |
| JCVI group                                 | Priority groups 2-9 are as defined by the JCVI expert advisory group, and we further define groups 10, 11 and 12 are defined as those aged 40-49, 30-39 and 18-29 years, respectively, who were not assigned to JCVI groups 4 (high risk) or 6 (at-risk).                                                                                                                                                                                       | 2-12                                                                                          | -                                                                                                     |
| Eligibility date                           | Date on which JCVI group (or age range within group) became eligible for 1st dose of COVID-19 vaccination.                                                                                                                                                                                                                                                                                                                                      | Date                                                                                          | -                                                                                                     |
| Region                                     | NHS region based on practice address.                                                                                                                                                                                                                                                                                                                                                                                                           | East of England; Midlands; London; North East; Yorkshire; North West; South East; South West. | Eligibility date + 6 weeks.                                                                           |
| <b>Potential confounders (demographic)</b> |                                                                                                                                                                                                                                                                                                                                                                                                                                                 |                                                                                               |                                                                                                       |
| Sex                                        | -                                                                                                                                                                                                                                                                                                                                                                                                                                               | M; F.                                                                                         | -                                                                                                     |
| Age                                        | Age in whole years.                                                                                                                                                                                                                                                                                                                                                                                                                             | Numeric <sup>a</sup>                                                                          | Start of SVP                                                                                          |
| Ethnicity                                  | From primary care records or SUS if missing from primary care.                                                                                                                                                                                                                                                                                                                                                                                  | Black; Mixed; South Asian; White; Other.                                                      | Eligibility date + 6 weeks                                                                            |

**Supplementary Table 3: Variable definitions (continued)**

| Name                                           | Description                                                                                                                                                                                                                                                                                                                                  | Encoding                                                                             | Date defined                                                                                                                                   |
|------------------------------------------------|----------------------------------------------------------------------------------------------------------------------------------------------------------------------------------------------------------------------------------------------------------------------------------------------------------------------------------------------|--------------------------------------------------------------------------------------|------------------------------------------------------------------------------------------------------------------------------------------------|
| Index of Multiple Deprivation (IMD)            | IMD quintile based on patient address. The IMD is a measure of socioeconomic deprivation based on lower-layer super output area (LSOA; a small geographical area defined by the Office of National Statistics). For more information see the <a href="#">English IMD 2019: technical report</a>                                              | 1; 2; 3; 4; 5.                                                                       | Eligibility date + 6 weeks                                                                                                                     |
| <b>Potential confounders (clinical)</b>        |                                                                                                                                                                                                                                                                                                                                              |                                                                                      |                                                                                                                                                |
| Body Mass Index (BMI)                          | Based on numeric BMI data from primary care records.                                                                                                                                                                                                                                                                                         | Under 30kg/m <sup>2</sup> or not recorded; 30-34.9; 35-39.9; 40+ kg/m <sup>2</sup> . | Start of SVP                                                                                                                                   |
| Learning disability including Down's syndrome. | Any code in primary care record before date defined.                                                                                                                                                                                                                                                                                         | 0; 1.                                                                                | Start of SVP                                                                                                                                   |
| Serious mental illness.                        | Any code in primary care record before date defined.                                                                                                                                                                                                                                                                                         | 0; 1.                                                                                | Start of SVP                                                                                                                                   |
| Multimorbidity                                 | Number of the following comorbid conditions in different organ systems: Chronic heart disease; Chronic respiratory disease; Chronic liver disease; Chronic kidney disease; Diabetes; Chronic neurological disease; Immunosuppressed (diagnosis of permanent immunosuppression or asplenia, or currently taking immunosuppressant medication) | 0; 1; 2+                                                                             | Start of SVP                                                                                                                                   |
| Influenza vaccination                          | Any record in past 5 years.                                                                                                                                                                                                                                                                                                                  | 0; 1.                                                                                | Start of SVP                                                                                                                                   |
| Pregnancy                                      | Pregnancy recorded in 36 weeks prior to date and no delivery code recorded more recently than pregnancy code.                                                                                                                                                                                                                                | 0; 1.                                                                                | Start of SVP                                                                                                                                   |
| Number of SARS-CoV-2 tests.                    | SARS-CoV-2 tests were identified using SGSS records and based on swab date. Both polymerase chain reaction (PCR) and lateral flow tests will be included, without differentiation between symptomatic and asymptomatic infection.                                                                                                            | Integer                                                                              | Between 18 May 2020 (when widespread testing became available in England) and the earliest date of eligibility for first dose in the subgroup. |

JCVI: Joint Committee on Vaccination and Immunisation; SVP: second vaccination period.

<sup>a</sup> Age was modelled separately within each strata. Age within strata was modelled as linear, with quadratic terms additionally included for strata with age range >5 years.

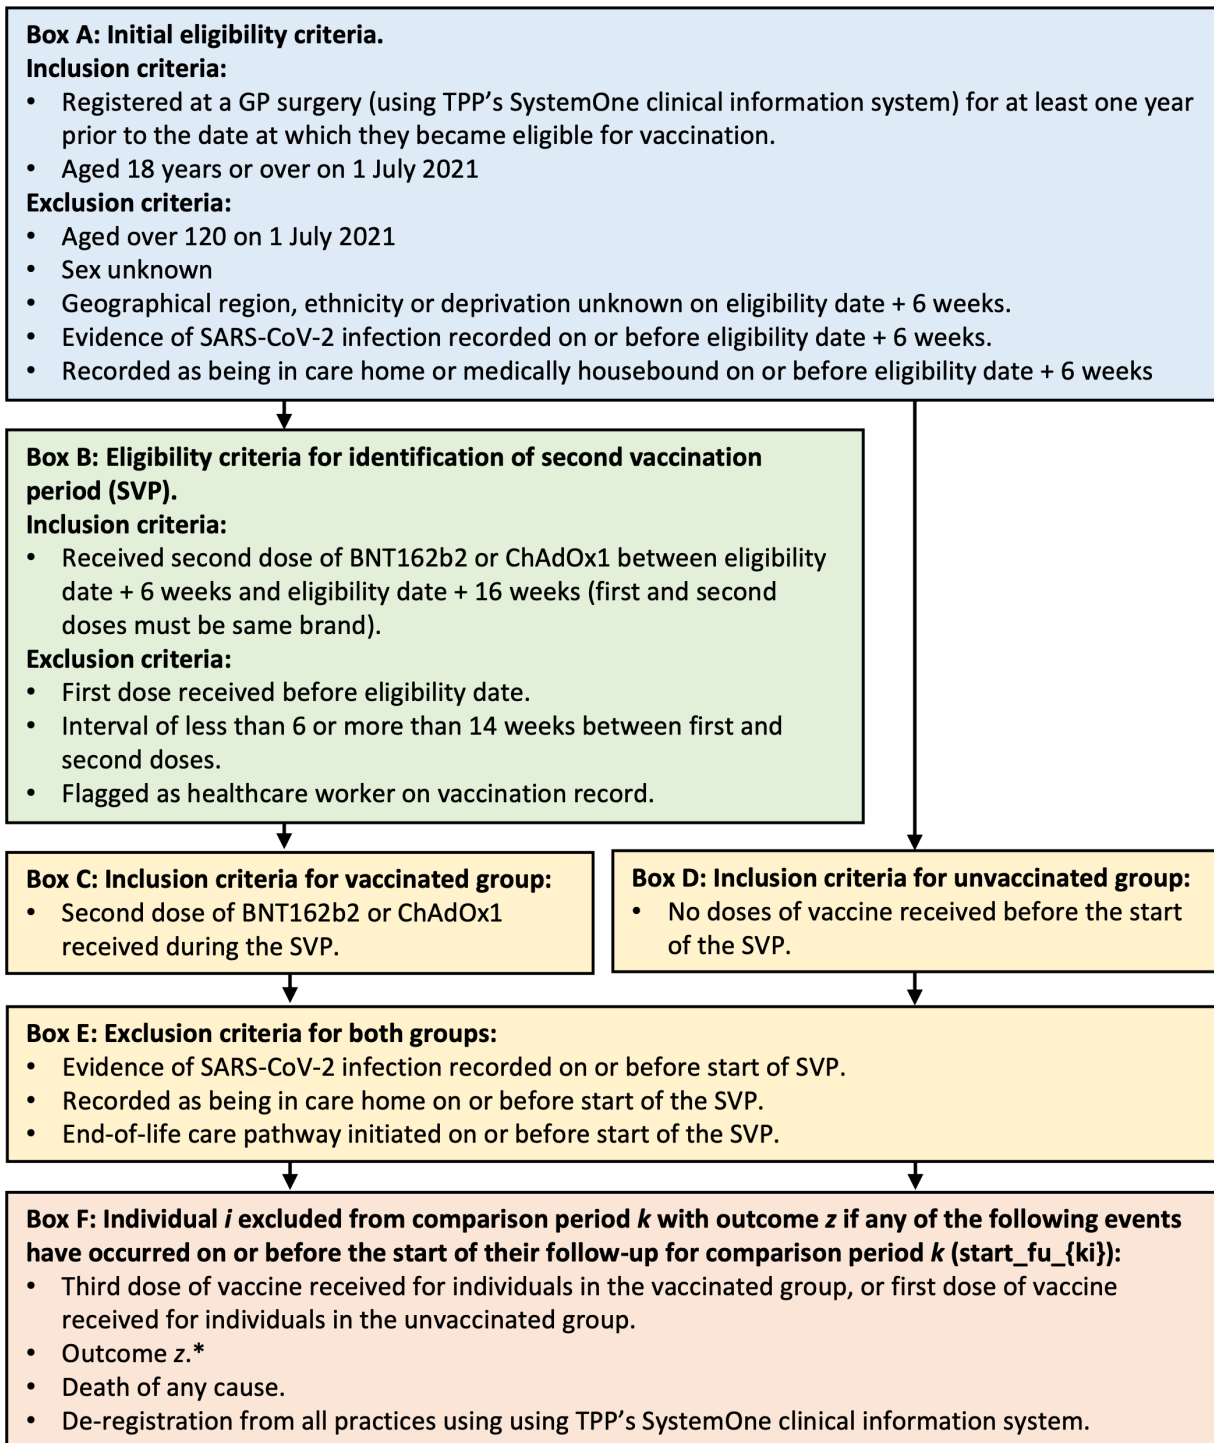

Supplementary Figure 1: Study eligibility criteria.



## Supplementary Results

### Study population

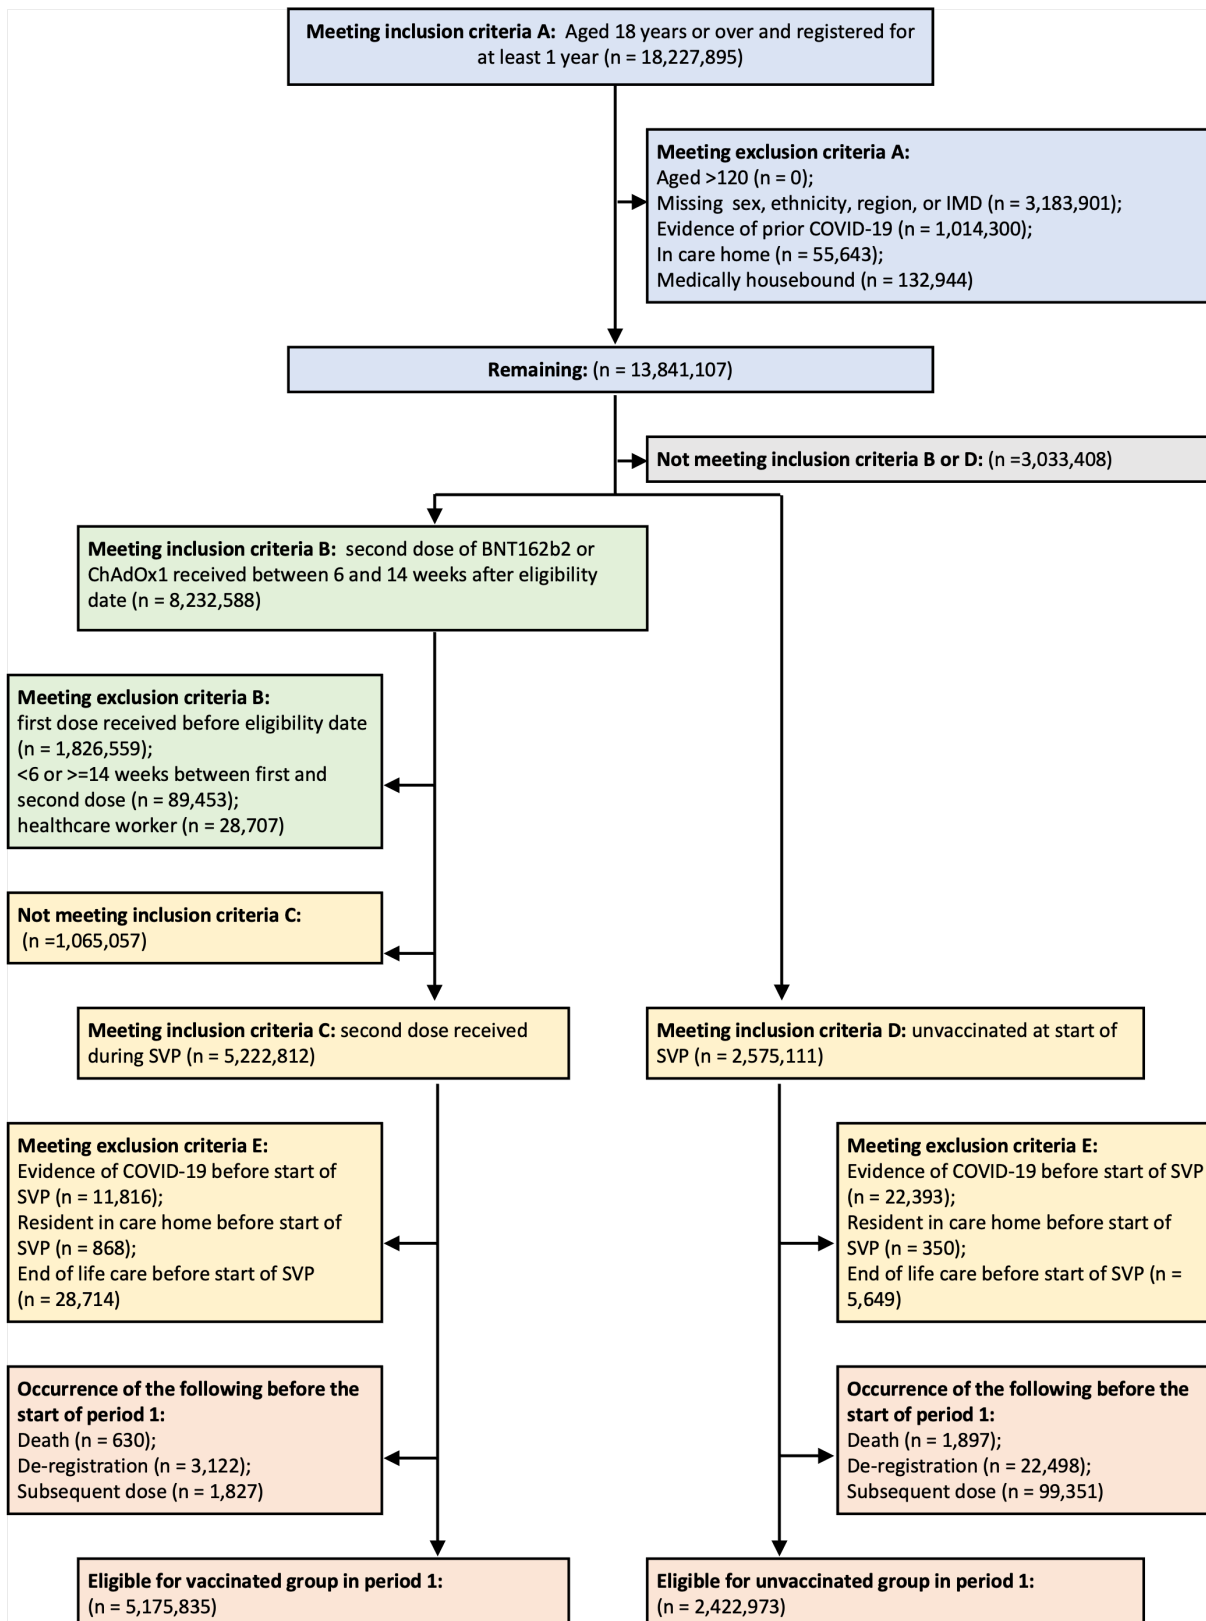

Supplementary Figure 2: Flow of individuals into study

Eligible from 2020-12-08  
 JCVI group 2; age range: 80 + years

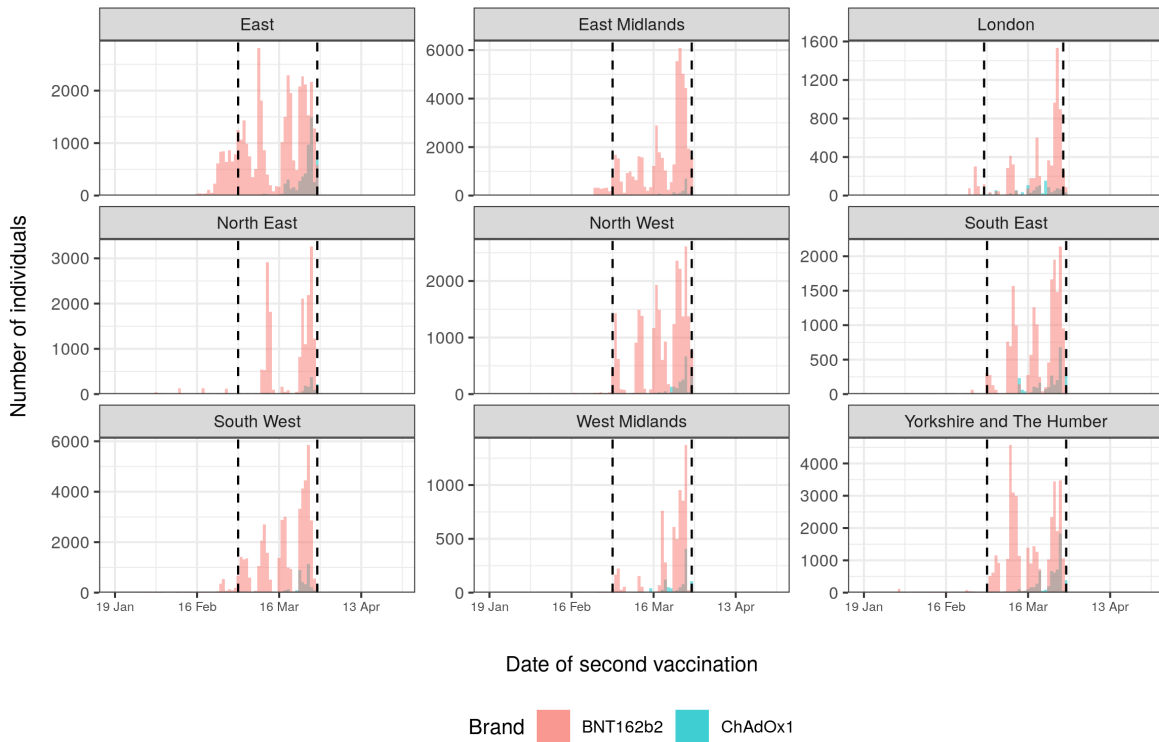

**Supplementary Figure 3: Second vaccination period for JCVI group 2**

Eligible from 2021-01-18  
 JCVI group 3; age range: 75 - 79 years

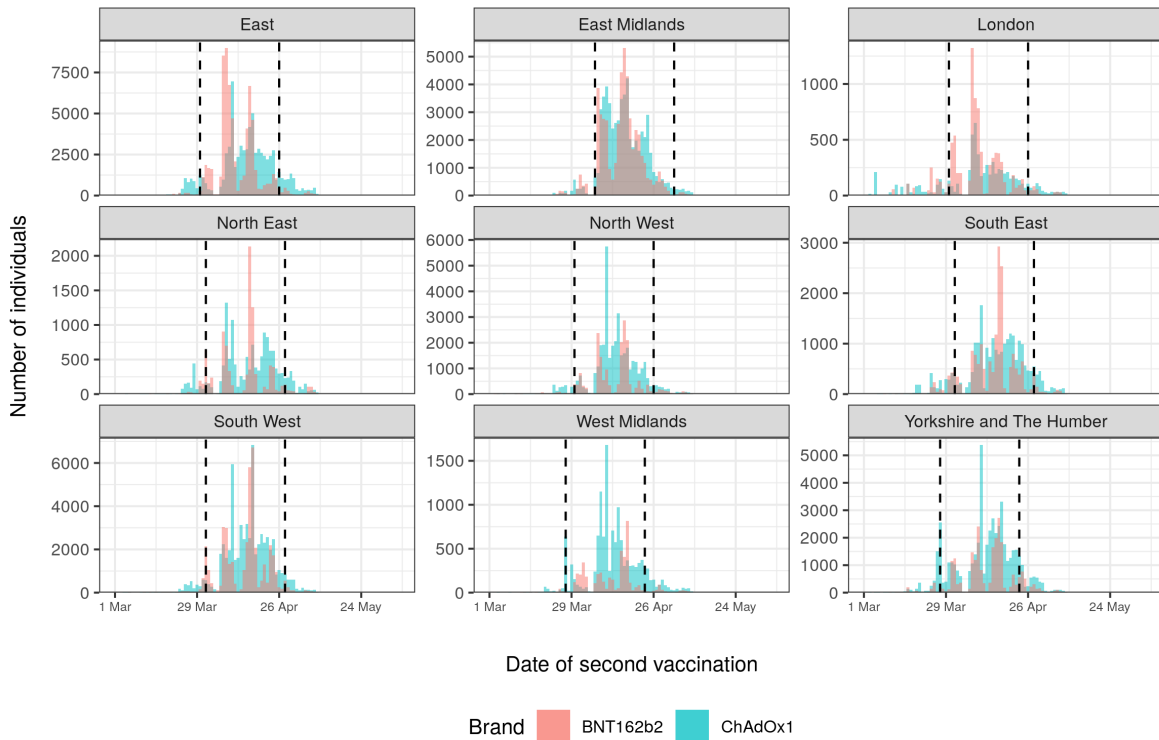

**Supplementary Figure 4: Second vaccination period for JCVI group 3**

Eligible from 2021-01-18  
JCVI group 4a; age range: 70 - 74 years

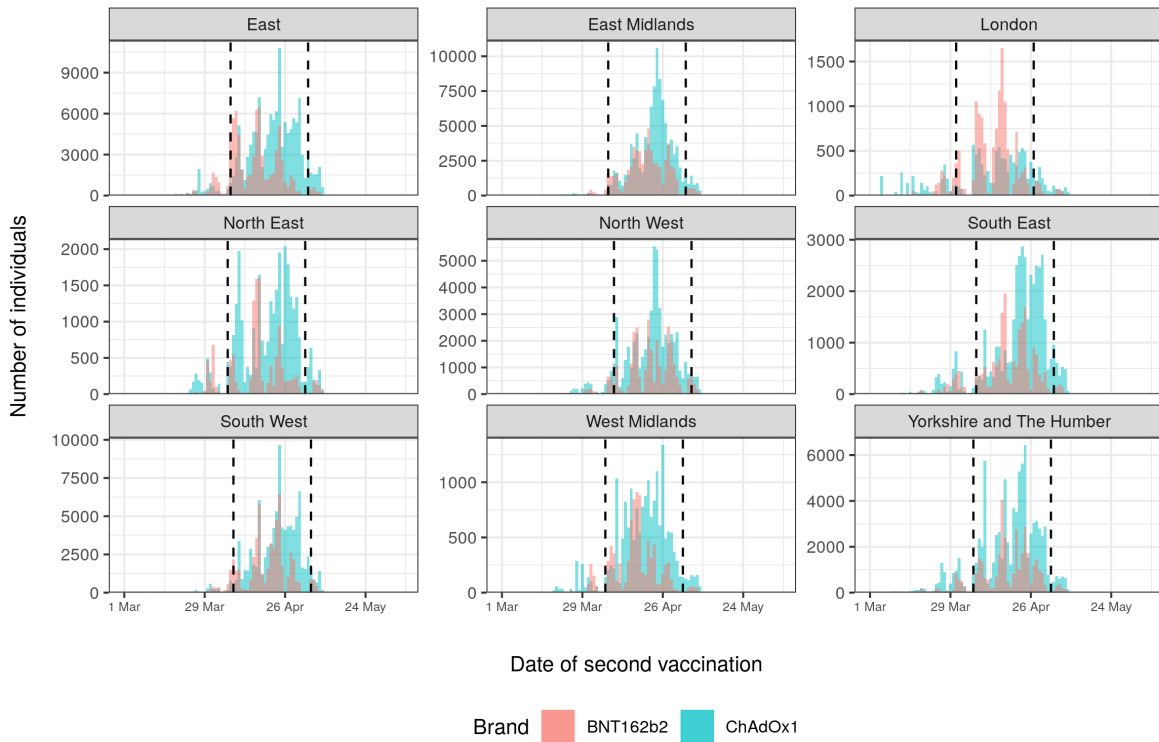

**Supplementary Figure 5: Second vaccination period for JCVI group 4**

Eligible from 2021-01-18  
JCVI group 4b; age range: 18 - 69 years

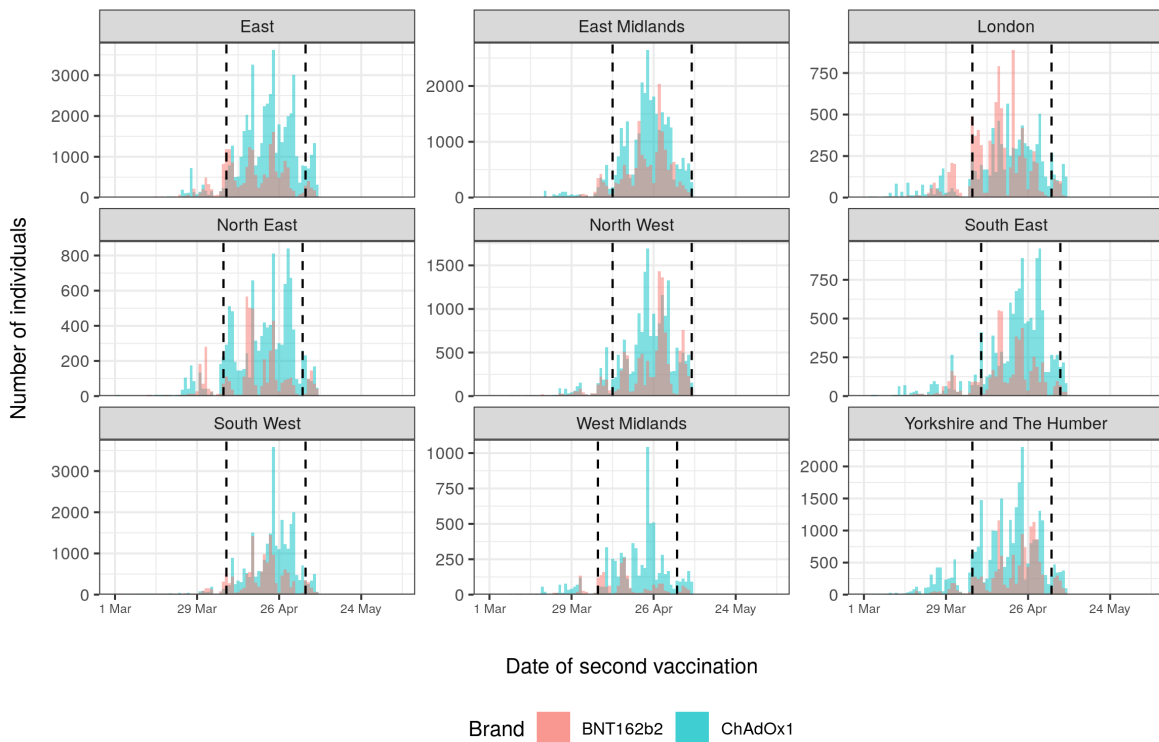

**Supplementary Figure 6: Second vaccination period for JCVI group 4**

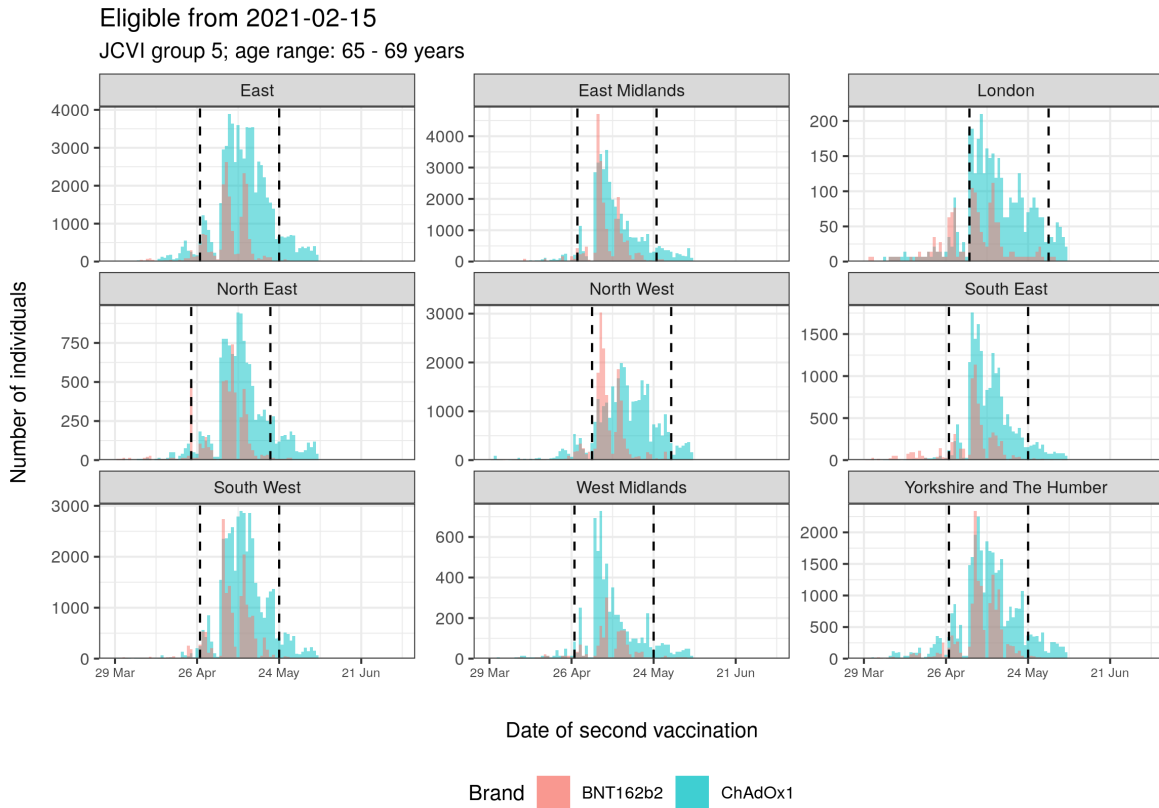

**Supplementary Figure 7: Second vaccination period for JCVI group 5**

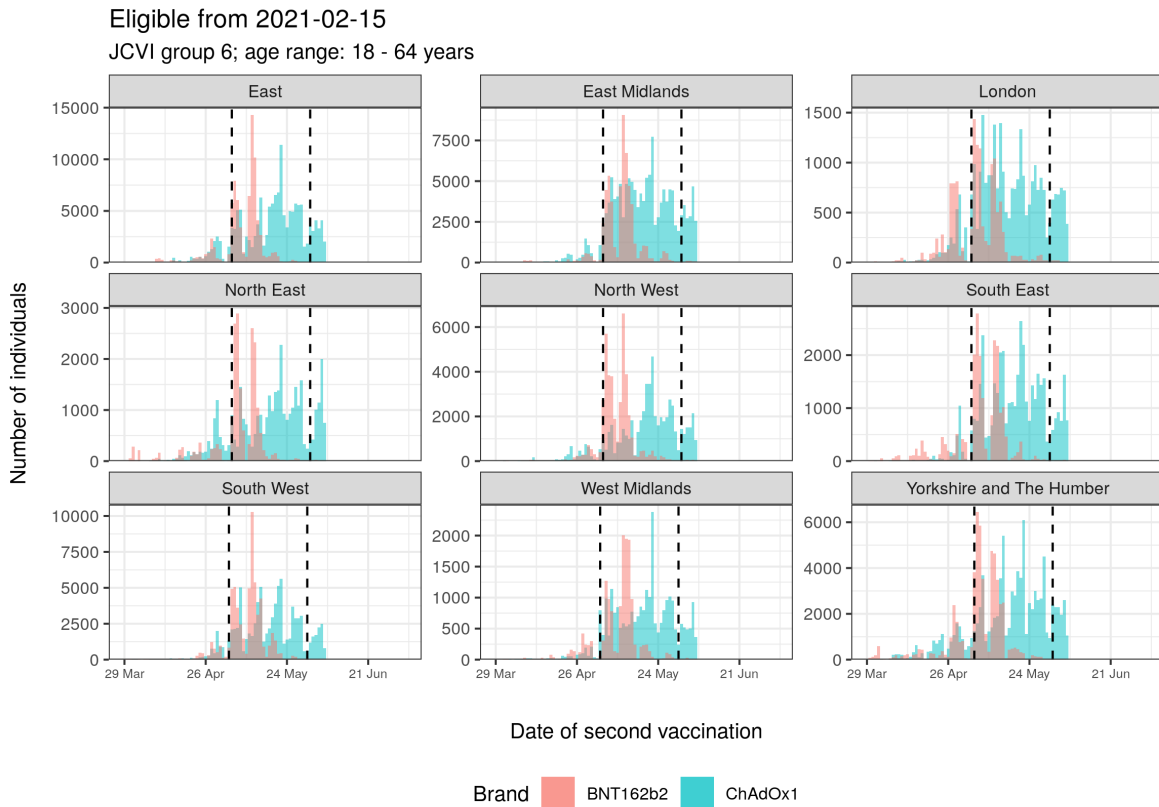

**Supplementary Figure 8: Second vaccination period for JCVI group 6**

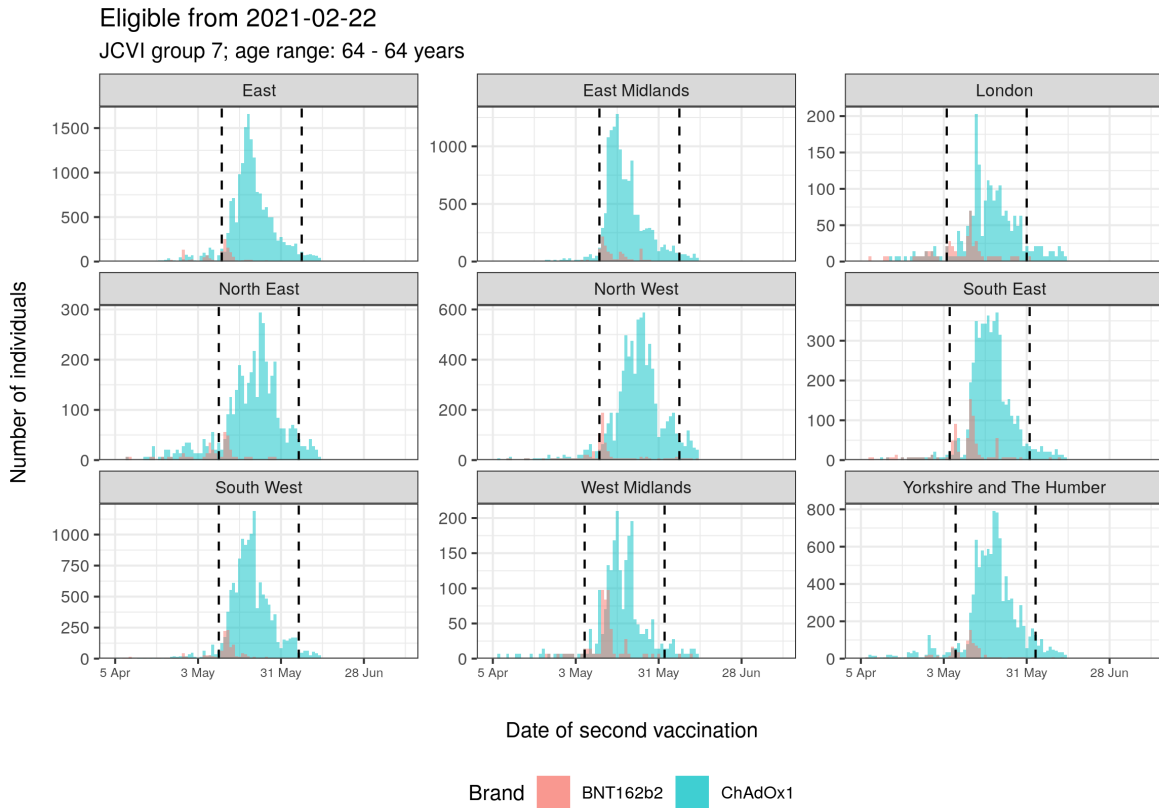

**Supplementary Figure 9:** Second vaccination period for JCVI group 7 and aged 64 years

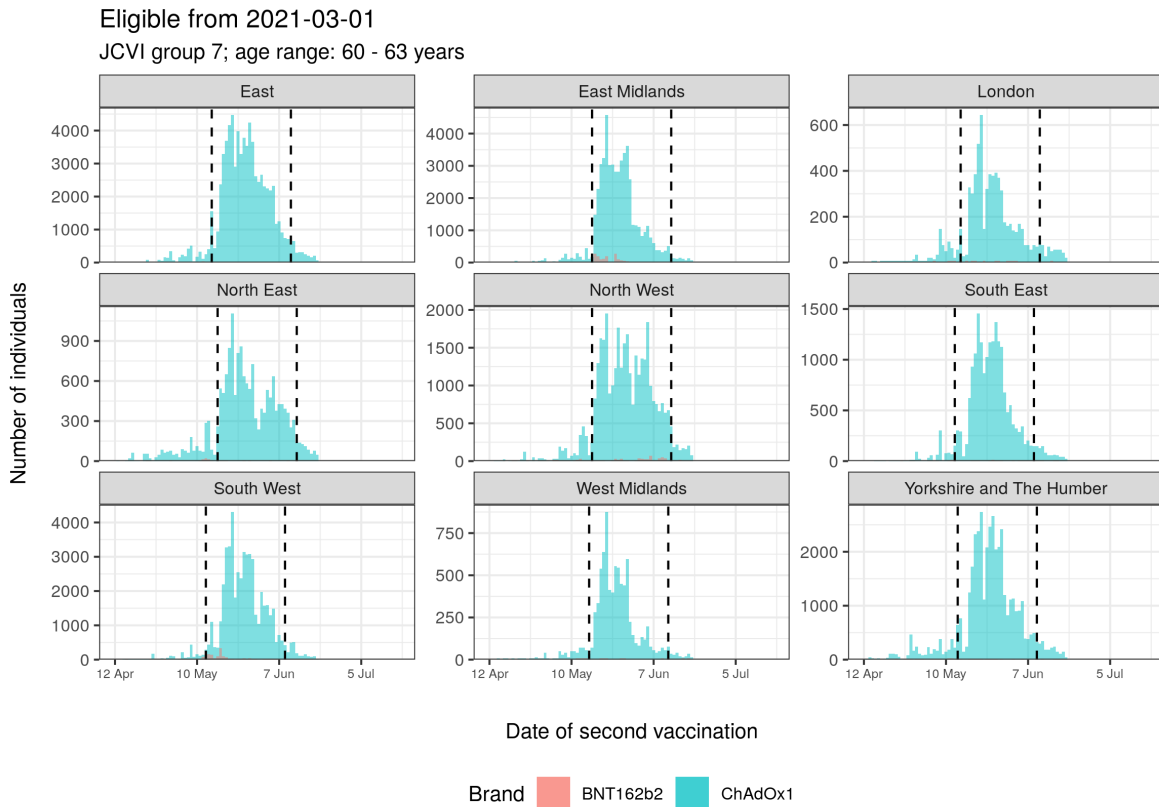

**Supplementary Figure 10:** Second vaccination period for JCVI group 7 and aged 60-63 years

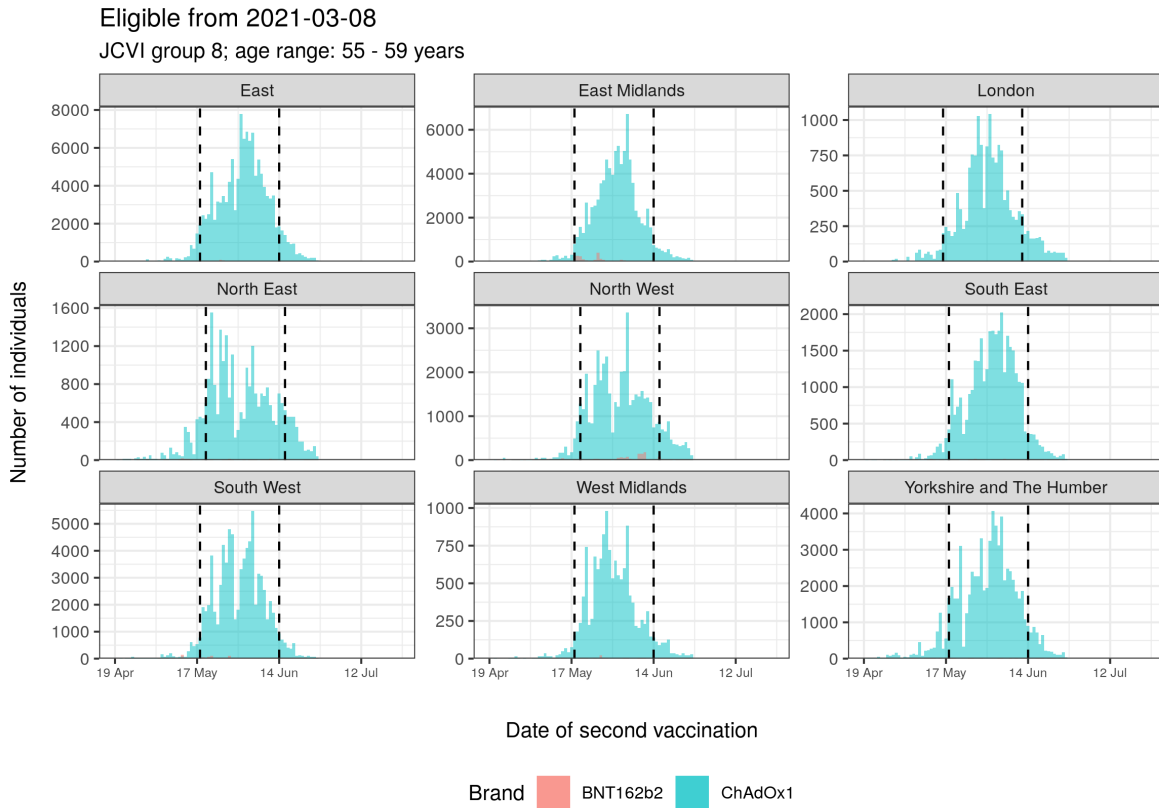

**Supplementary Figure 11: Second vaccination period for JCVI group 8**

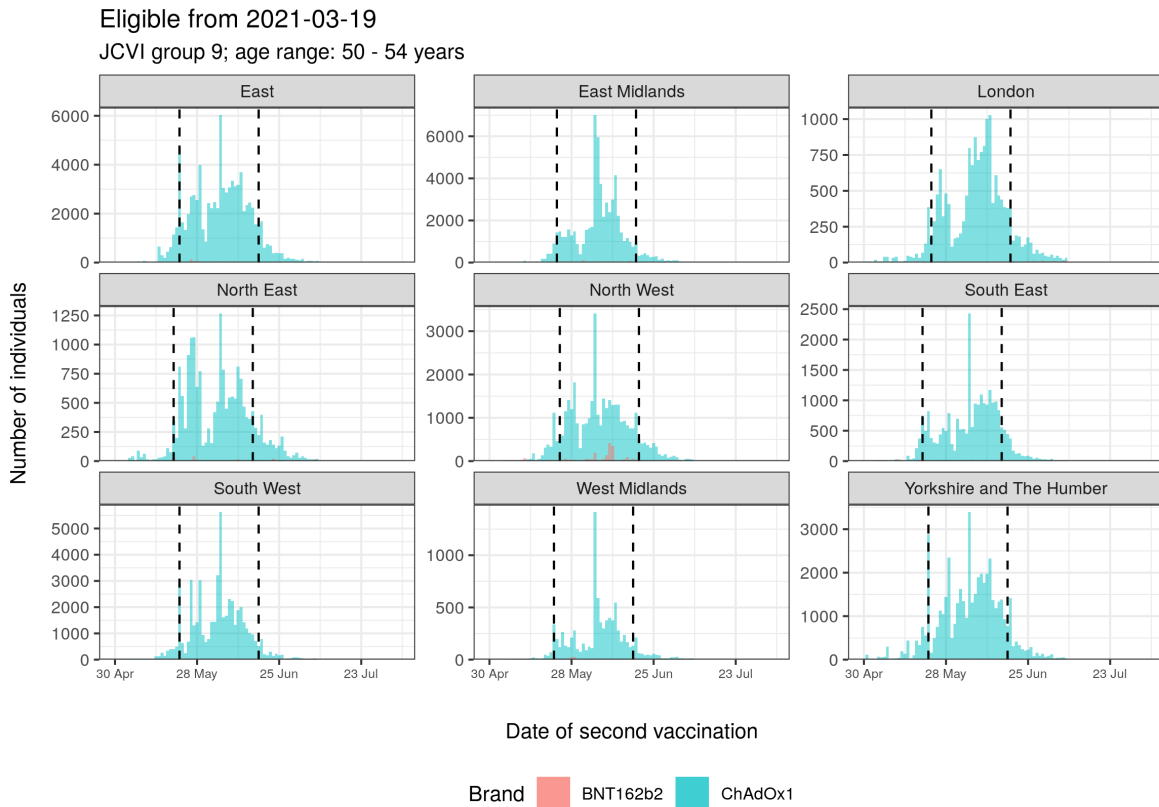

**Supplementary Figure 12: Second vaccination period for JCVI group 9**

Eligible from 2021-04-13  
 JCVI group 10; age range: 45 - 49 years

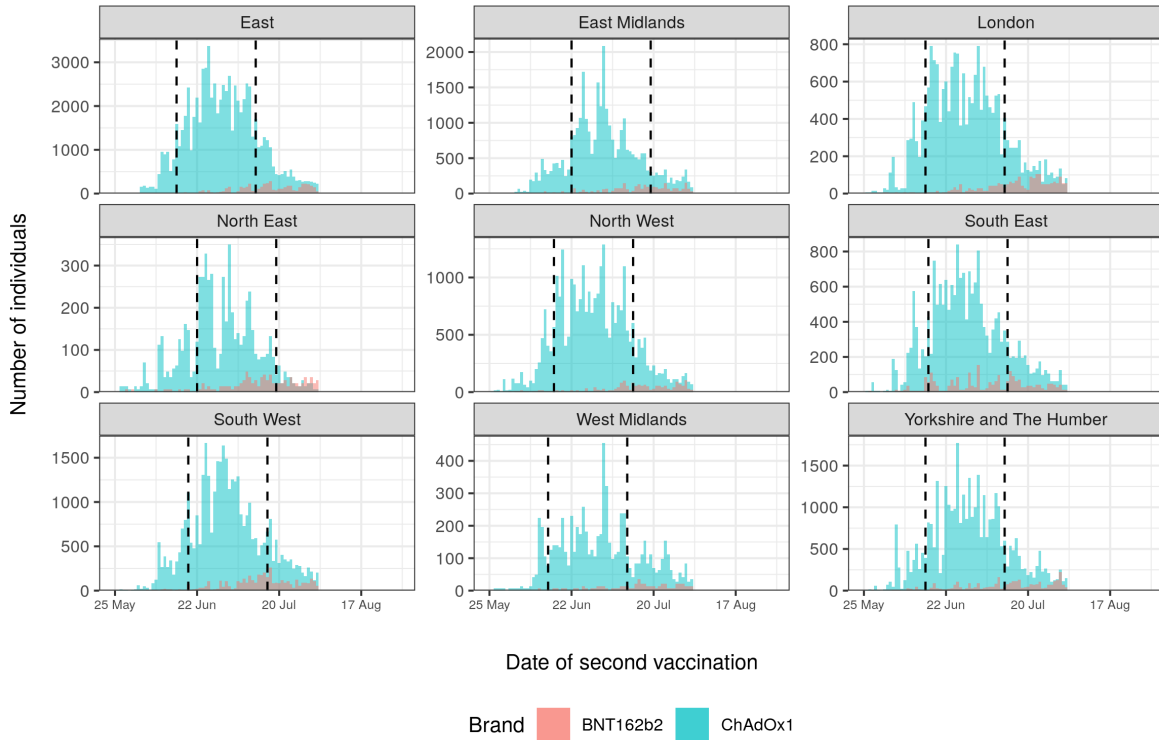

**Supplementary Figure 13:** Second vaccination period for JCVI group 10 and aged 45-49 years

Eligible from 2021-04-26  
 JCVI group 10; age range: 40 - 44 years

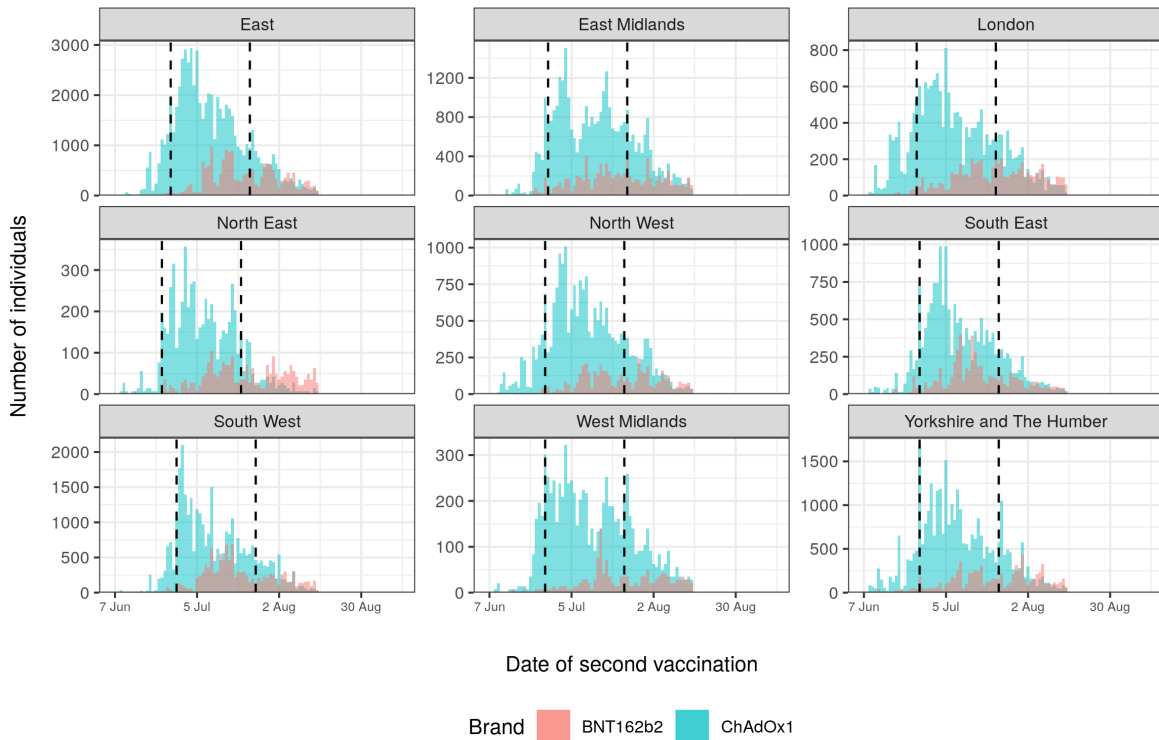

**Supplementary Figure 14:** Second vaccination period for JCVI group 10 and aged 40-44 years

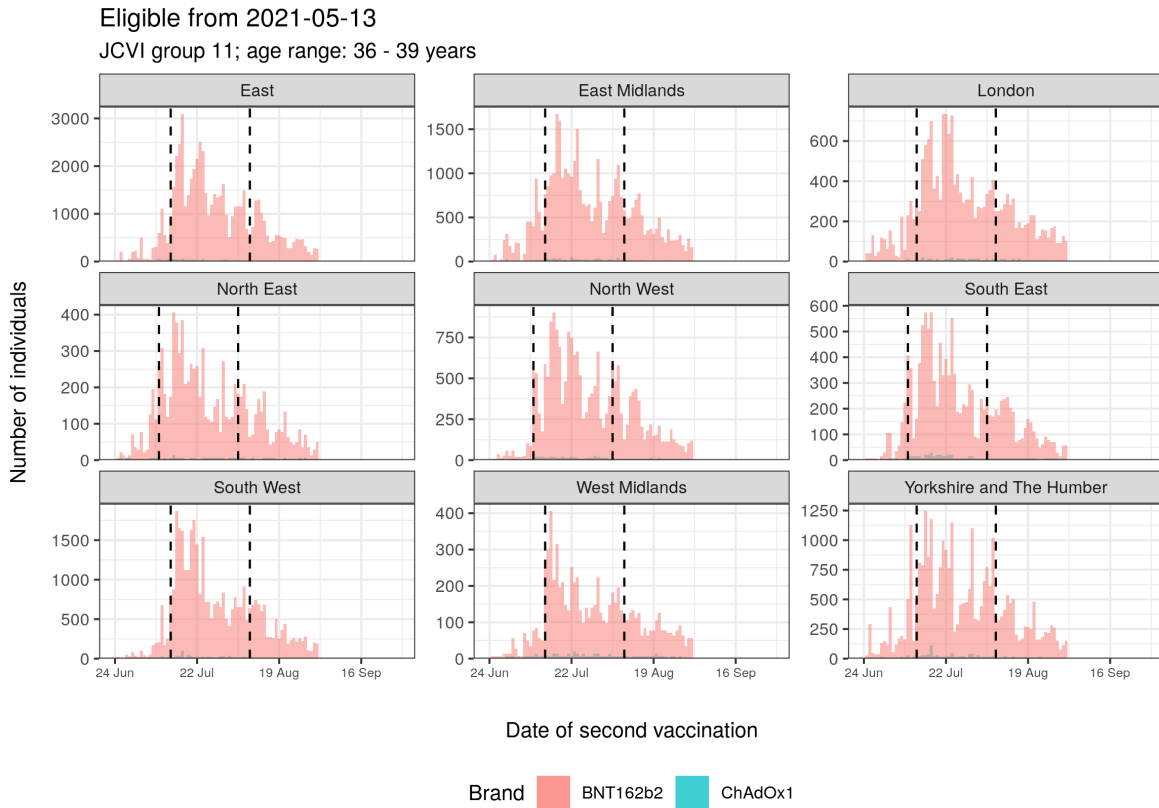

**Supplementary Figure 15:** Second vaccination period for JCVI group 11 and aged 36-39 years

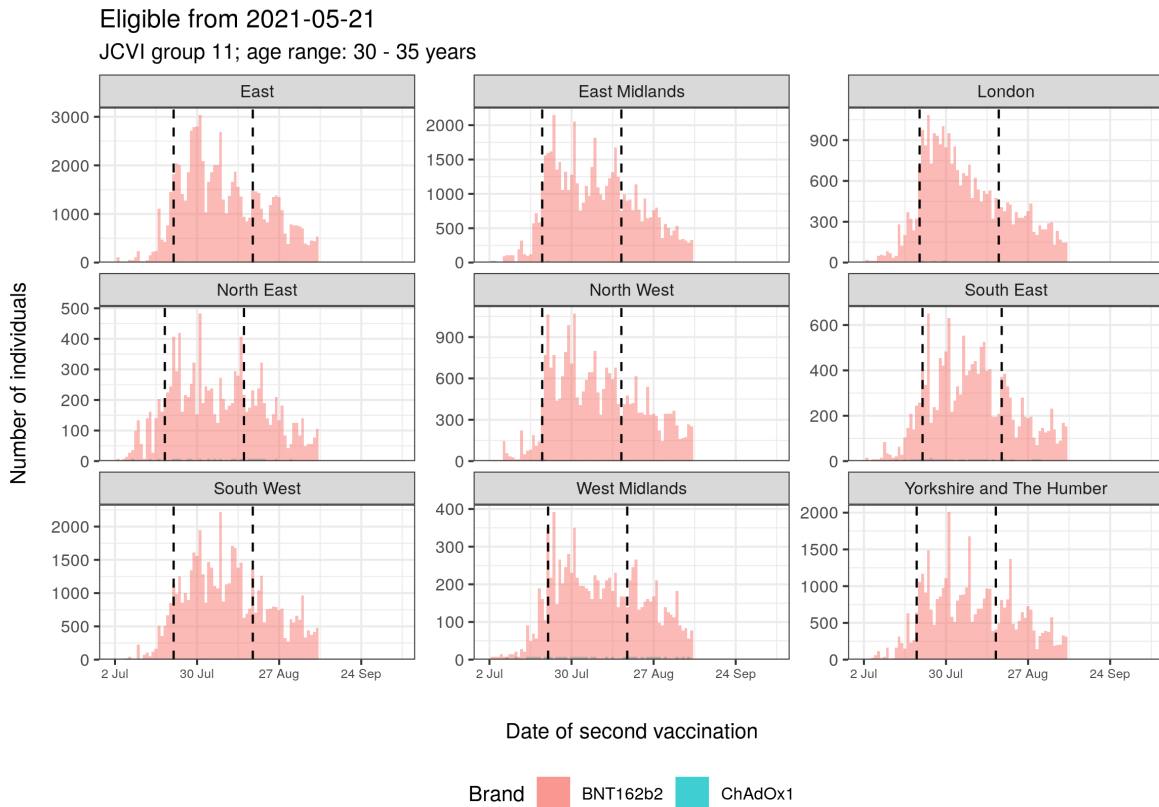

**Supplementary Figure 16:** Second vaccination period for JCVI group 11 and aged 30-35 years



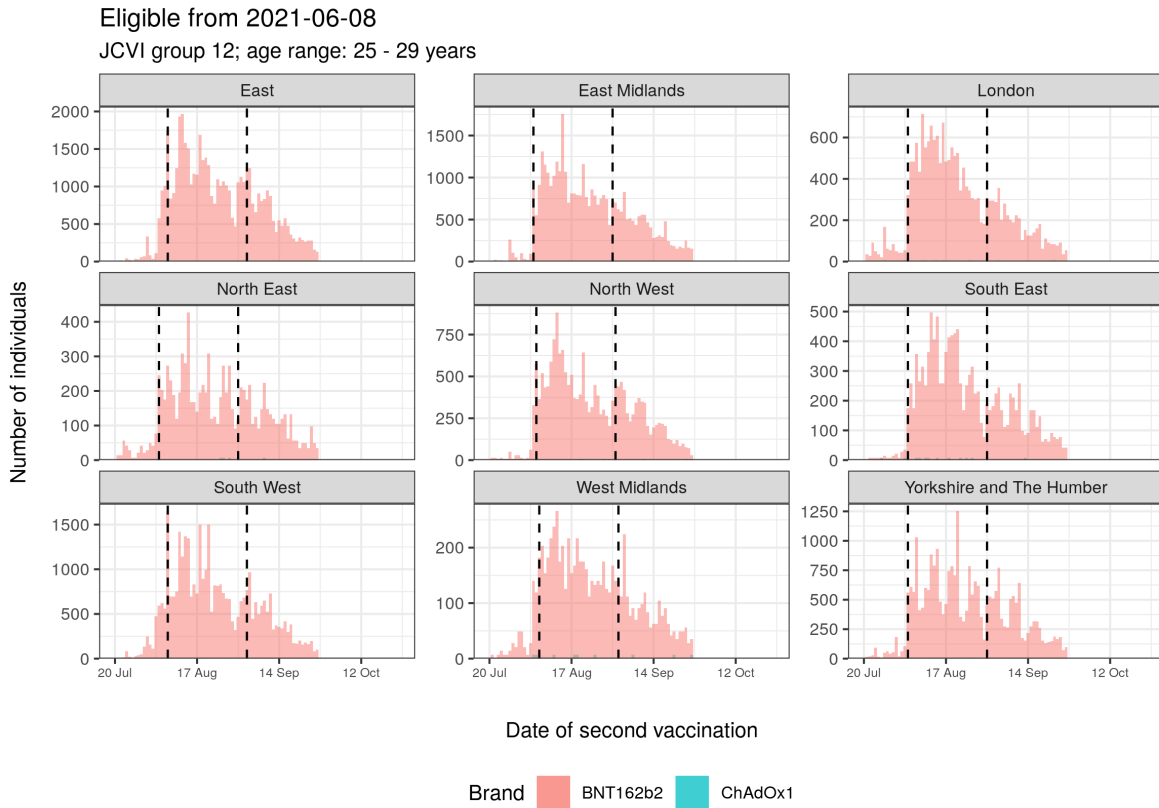

**Supplementary Figure 17:** Second vaccination period for JCVI group 12 and aged 25-29 years

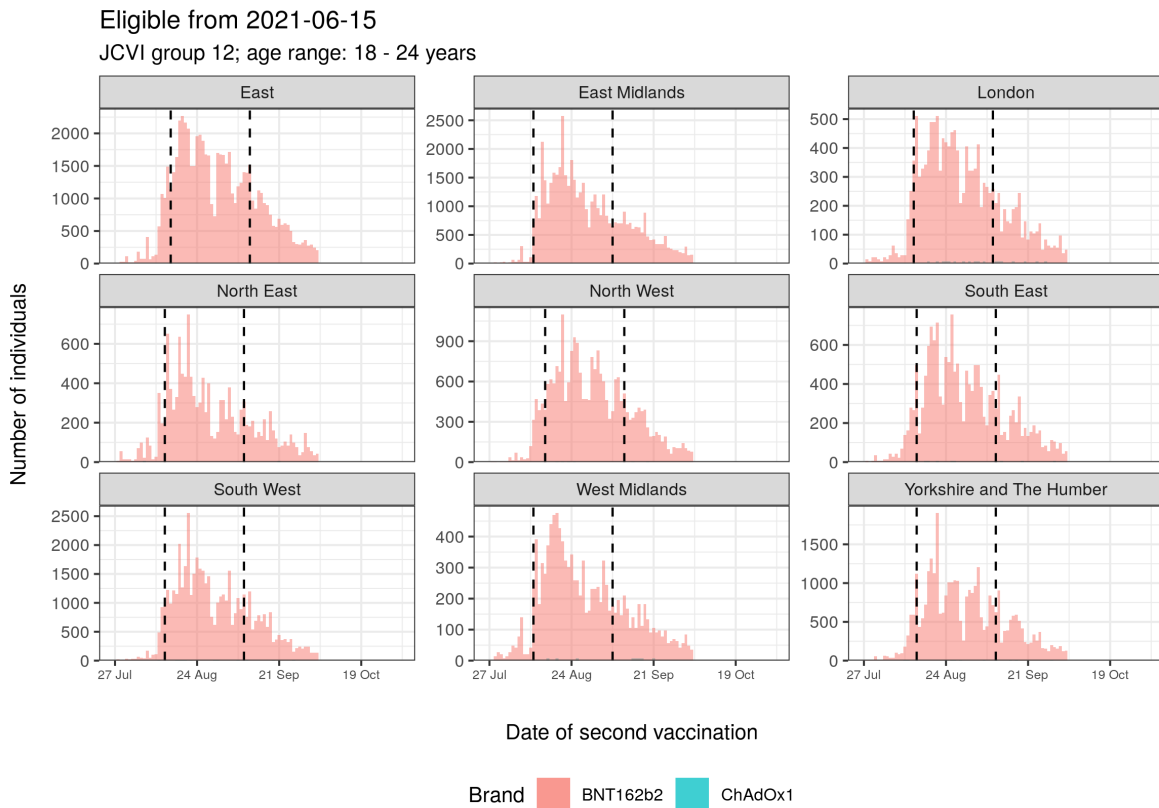

**Supplementary Figure 18:** Second vaccination period for JCVI group 12 and aged 18-24 years

**Supplementary Table 4: Additional characteristics summarised across subgroups.**

| Characteristic | Characteristic               | 65+ years     |               |              | 18-64 years and clinically vulnerable |               |               | 40-64 years <sup>a</sup> |               |               | 18-39 years <sup>a</sup> |               |
|----------------|------------------------------|---------------|---------------|--------------|---------------------------------------|---------------|---------------|--------------------------|---------------|---------------|--------------------------|---------------|
|                |                              | BNT162b2      | ChAdOx1       | Unvaccinated | BNT162b2                              | ChAdOx1       | Unvaccinated  | BNT162b2                 | ChAdOx1       | Unvaccinated  | BNT162b2                 | Unvaccinated  |
| N              |                              | 830,662       | 1,096,872     | 144,774      | 368,732                               | 649,075       | 300,881       | 63,021                   | 1,473,402     | 625,226       | 689,451                  | 1,352,099     |
| Region         | East                         | 182,441 (22%) | 248,297 (23%) | 32,102 (22%) | 79,870 (22%)                          | 150,577 (23%) | 61,488 (20%)  | 13,545 (21%)             | 377,615 (26%) | 139,706 (22%) | 165,361 (24%)            | 300,195 (22%) |
|                | East Midlands                | 169,330 (20%) | 192,297 (18%) | 21,903 (15%) | 63,406 (17%)                          | 133,644 (21%) | 51,184 (17%)  | 11,809 (19%)             | 249,235 (17%) | 95,851 (15%)  | 119,343 (17%)            | 221,284 (16%) |
|                | London                       | 28,147 (3%)   | 18,963 (2%)   | 20,356 (14%) | 14,518 (4%)                           | 28,203 (4%)   | 34,545 (11%)  | 3,633 (6%)               | 63,714 (4%)   | 105,518 (17%) | 53,270 (8%)              | 194,313 (14%) |
|                | North East                   | 40,446 (5%)   | 52,752 (5%)   | 5,866 (4%)   | 18,795 (5%)                           | 32,424 (5%)   | 16,114 (5%)   | 1,757 (3%)               | 63,378 (4%)   | 25,242 (4%)   | 27,048 (4%)              | 62,153 (5%)   |
|                | North West                   | 84,385 (10%)  | 122,262 (11%) | 9,625 (7%)   | 45,262 (12%)                          | 59,115 (9%)   | 23,716 (8%)   | 6,489 (10%)              | 149,520 (10%) | 40,264 (6%)   | 60,599 (9%)              | 90,174 (7%)   |
|                | South East                   | 56,105 (7%)   | 78,918 (7%)   | 9,695 (7%)   | 20,314 (6%)                           | 42,910 (7%)   | 15,771 (5%)   | 5,824 (9%)               | 102,249 (7%)  | 37,513 (6%)   | 38,479 (6%)              | 78,414 (6%)   |
|                | South West                   | 149,415 (18%) | 194,306 (18%) | 17,955 (12%) | 62,265 (17%)                          | 89,467 (14%)  | 28,917 (10%)  | 12,831 (20%)             | 233,709 (16%) | 61,663 (10%)  | 119,392 (17%)            | 125,447 (9%)  |
|                | West Midlands                | 19,579 (2%)   | 35,014 (3%)   | 7,966 (6%)   | 13,916 (4%)                           | 26,201 (4%)   | 19,012 (6%)   | 1,337 (2%)               | 39,711 (3%)   | 31,444 (5%)   | 23,345 (3%)              | 76,685 (6%)   |
|                | Yorkshire and The Humber     | 100,842 (12%) | 154,084 (14%) | 19,313 (13%) | 50,414 (14%)                          | 86,555 (13%)  | 50,155 (17%)  | 5,817 (9%)               | 194,299 (13%) | 88,046 (14%)  | 82,635 (12%)             | 203,455 (15%) |
| JCVI group     | 02                           | 225,106 (27%) | 23,268 (2%)   | 30,436 (21%) | -                                     | -             | -             | -                        | -             | -             | -                        | -             |
|                | 03                           | 222,292 (27%) | 292,005 (27%) | 22,449 (16%) | -                                     | -             | -             | -                        | -             | -             | -                        | -             |
|                | 04a                          | 271,439 (33%) | 514,983 (47%) | 38,696 (27%) | -                                     | -             | -             | -                        | -             | -             | -                        | -             |
|                | 04b                          | 19,355 (2%)   | 38,892 (4%)   | 3,199 (2%)   | 61,264 (17%)                          | 130,347 (20%) | 29,834 (10%)  | -                        | -             | -             | -                        | -             |
|                | 05                           | 92,484 (11%)  | 227,731 (21%) | 50,008 (35%) | -                                     | -             | -             | -                        | -             | -             | -                        | -             |
|                | 06                           | -             | -             | -            | 307,468 (83%)                         | 518,735 (80%) | 271,054 (90%) | -                        | -             | -             | -                        | -             |
|                | 07                           | -             | -             | -            | -                                     | -             | -             | 8,708 (14%)              | 346,850 (24%) | 52,892 (8%)   | -                        | -             |
|                | 08                           | -             | -             | -            | -                                     | -             | -             | 4,186 (7%)               | 455,196 (31%) | 84,497 (14%)  | -                        | -             |
|                | 09                           | -             | -             | -            | -                                     | -             | -             | 3,339 (5%)               | 303,793 (21%) | 113,652 (18%) | -                        | -             |
|                | 10                           | -             | -             | -            | -                                     | -             | -             | 46,802 (74%)             | 367,570 (25%) | 374,192 (60%) | -                        | -             |
|                | 11                           | -             | -             | -            | -                                     | -             | -             | -                        | -             | -             | 358,211 (52%)            | 674,485 (50%) |
|                | 12                           | -             | -             | -            | -                                     | -             | -             | -                        | -             | -             | 331,247 (48%)            | 677,614 (50%) |
|                | Chronic heart disease        | 253,715 (31%) | 272,706 (25%) | 29,883 (21%) | 87,850 (24%)                          | 145,915 (22%) | 52,955 (18%)  | 98 (0%)                  | 2,135 (0%)    | 658 (0%)      | 217 (0%)                 | 602 (0%)      |
|                | Chronic kidney disease       | 141,484 (17%) | 122,283 (11%) | 15,071 (10%) | 21,637 (6%)                           | 33,005 (5%)   | 9,240 (3%)    | 21 (0%)                  | 378 (0%)      | 84 (0%)       | 28 (0%)                  | 63 (0%)       |
|                | Chronic liver disease        | 23,723 (3%)   | 34,286 (3%)   | 4,025 (3%)   | 28,651 (8%)                           | 61,922 (10%)  | 34,524 (11%)  | 70 (0%)                  | 1,050 (0%)    | 420 (0%)      | 301 (0%)                 | 469 (0%)      |
|                | Chronic neurological disease | 88,788 (11%)  | 95,193 (9%)   | 11,669 (8%)  | 58,072 (16%)                          | 102,151 (16%) | 47,719 (16%)  | 28 (0%)                  | 581 (0%)      | 203 (0%)      | 154 (0%)                 | 371 (0%)      |
| Evidence of    | Chronic respiratory disease  | 88,256 (11%)  | 108,073 (10%) | 10,808 (7%)  | 33,397 (9%)                           | 59,941 (9%)   | 19,446 (6%)   | 84 (0%)                  | 1,652 (0%)    | 1,169 (0%)    | 455 (0%)                 | 3,423 (0%)    |
|                | Diabetes                     | 149,646 (18%) | 183,148 (17%) | 24,178 (17%) | 125,699 (34%)                         | 184,933 (28%) | 69,433 (23%)  | 126 (0%)                 | 3,045 (0%)    | 987 (0%)      | 672 (0%)                 | 2,373 (0%)    |
|                | Immunosuppression            | 44,303 (5%)   | 55,286 (5%)   | 4,326 (3%)   | 42,231 (11%)                          | 75,117 (12%)  | 24,822 (8%)   | 28 (0%)                  | 588 (0%)      | 196 (0%)      | 196 (0%)                 | 399 (0%)      |
|                | Learning disability          | 847 (0%)      | 1,470 (0%)    | 322 (0%)     | 11,585 (3%)                           | 22,645 (3%)   | 9,912 (3%)    | 7 (0%)                   | 21 (0%)       | 7 (0%)        | 56 (0%)                  | 112 (0%)      |
|                | Serious mental illness       | 6,818 (1%)    | 10,745 (1%)   | 3,297 (2%)   | 17,066 (5%)                           | 31,948 (5%)   | 32,333 (11%)  | 84 (0%)                  | 2,324 (0%)    | 2,492 (0%)    | 266 (0%)                 | 2,079 (0%)    |
| Pregnancy      | yes                          | -             | -             | -            | 742 (0%)                              | 1,890 (0%)    | 10,717 (4%)   | 322 (1%)                 | 301 (0%)      | 1,820 (0%)    | 8,456 (1%)               | 44,583 (3%)   |

<sup>a</sup> And not clinically vulnerable

Attrition due to subsequent vaccination

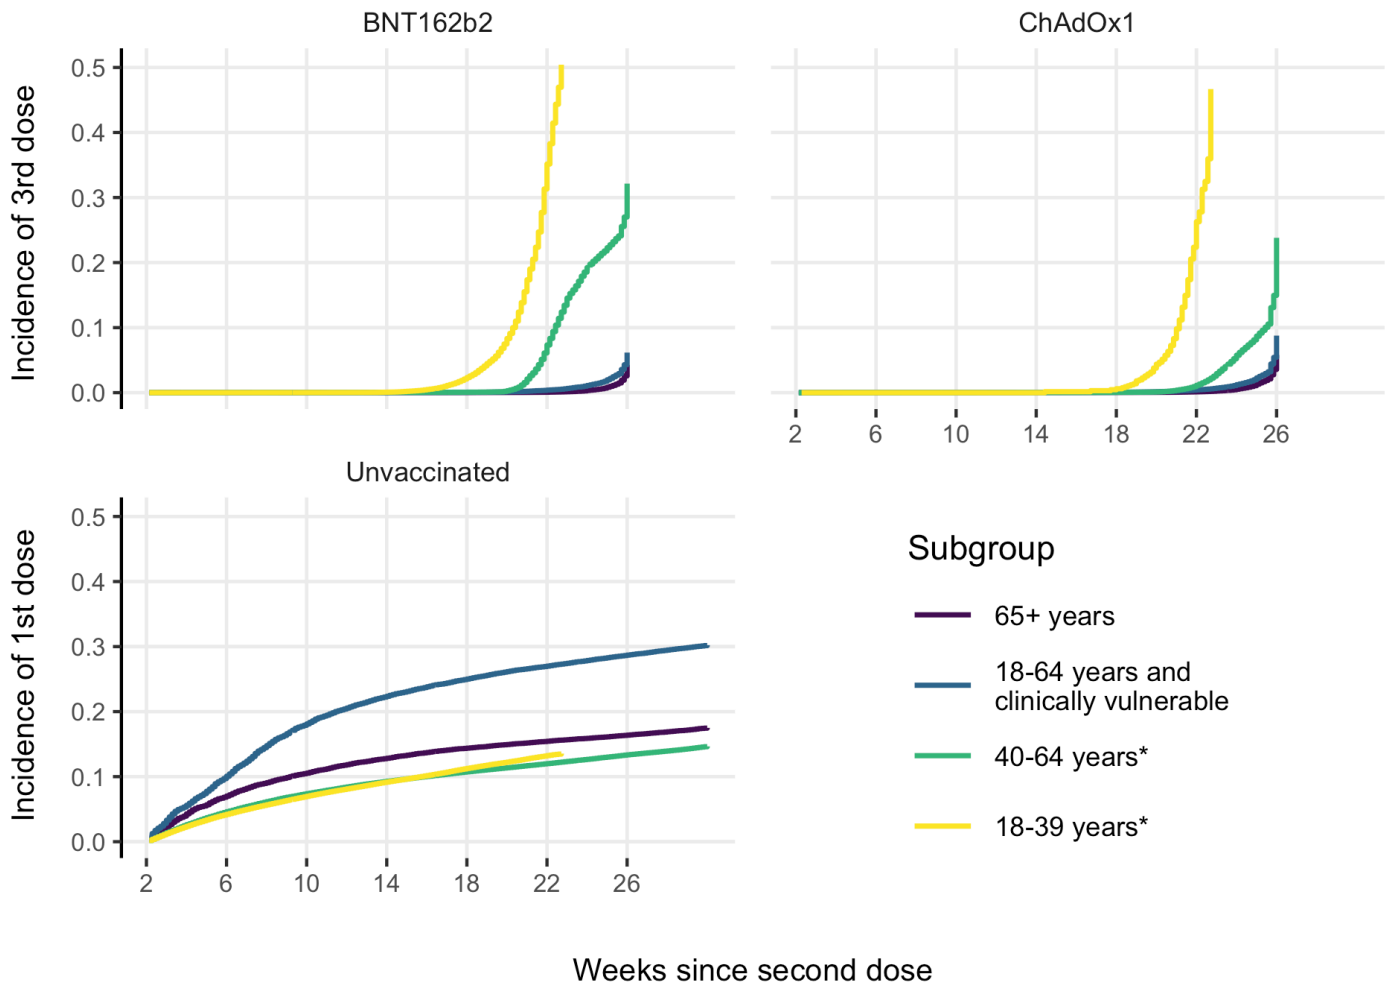

Supplementary Figure 19: Cumulative incidence of subsequent vaccination. \*And not clinically vulnerable.

## Distribution of follow-up time

The distribution of follow-up time in relation to virus variants is given in Supplementary Figures 20 to 23. We used 1 June 2021 as the approximate date at which the Delta variant became dominant in England ([BMJ 2021;373:n1445](#)), 1 December 2021 as the date at which the first cases of Omicron were detected, and 15 December 2021 as the date at which Omicron became dominant ([Omicron daily overview: 17 December 2021](#)).

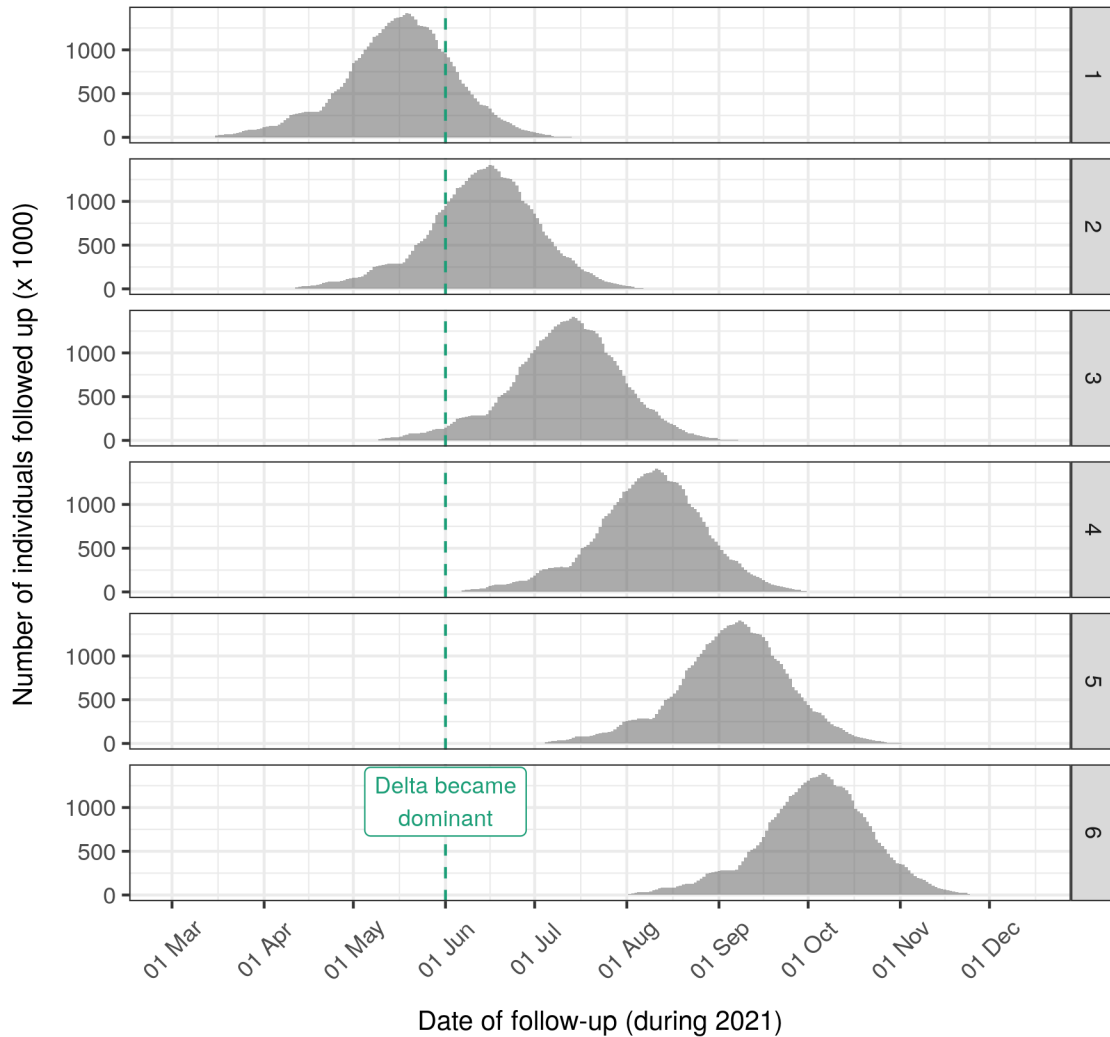

**Supplementary Figure 20:** Distribution of follow-up time across the six comparison periods in the 65+ years subgroup. Comparison periods (numeric labels on right-hand side of plots) correspond to the following weeks since second vaccine dose: 1 = 3-6 weeks; 2 = 7-10 weeks; 3 = 11-14 weeks; 4 = 15-18 weeks; 5 = 19-22 weeks; 6 = 23-26 weeks.

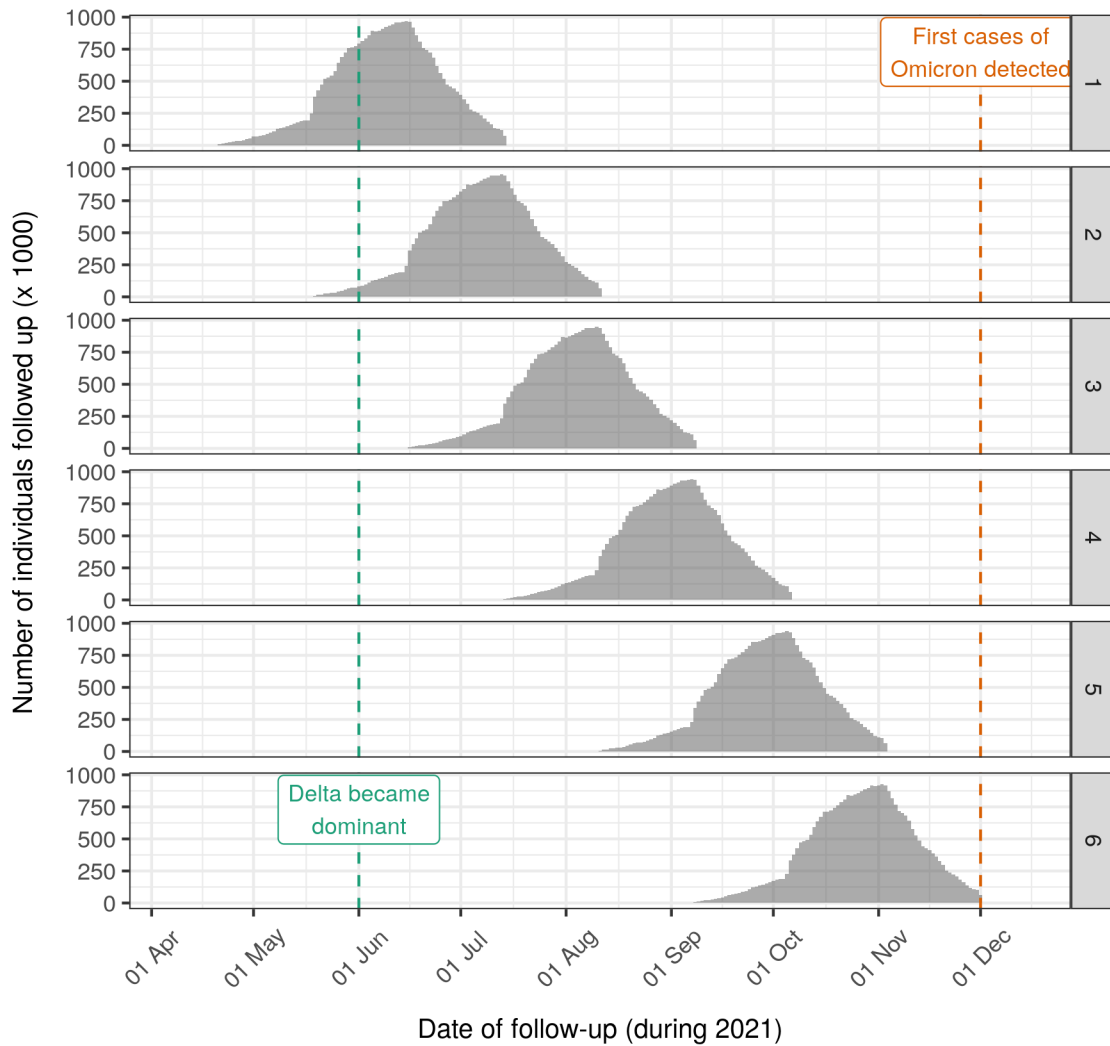

**Supplementary Figure 21:** Distribution of follow-up time across the six comparison periods in the 18-64 years and clinically vulnerable subgroup. Comparison periods (numeric labels on right-hand side of plots) correspond to the following weeks since second vaccine dose: 1 = 3-6 weeks; 2 = 7-10 weeks; 3 = 11-14 weeks; 4 = 15-18 weeks; 5 = 19-22 weeks; 6 = 23-26 weeks.

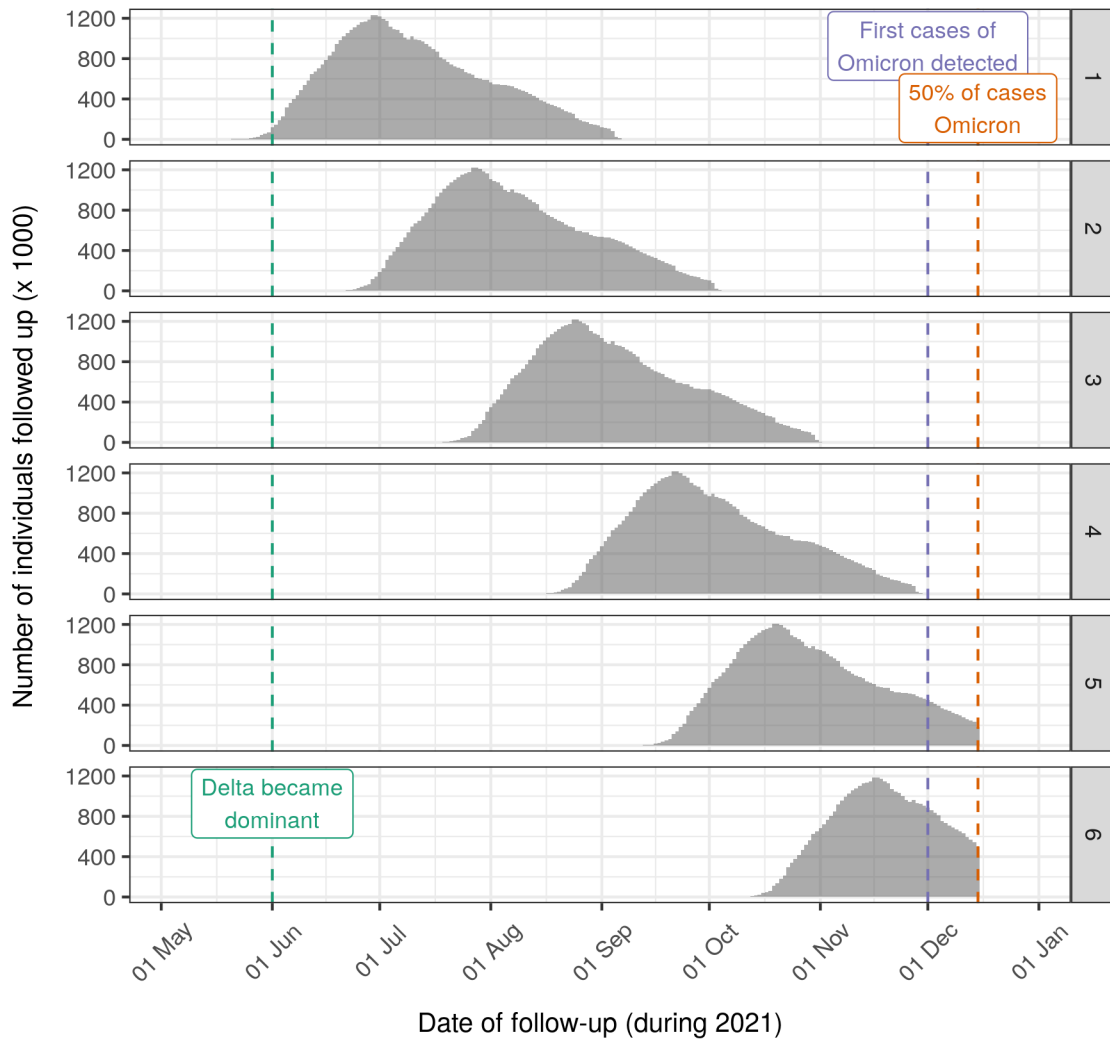

**Supplementary Figure 22:** Distribution of follow-up time across the six comparison periods in the 40-64 years subgroup. Comparison periods (numeric labels on right-hand side of plots) correspond to the following weeks since second vaccine dose: 1 = 3-6 weeks; 2 = 7-10 weeks; 3 = 11-14 weeks; 4 = 15-18 weeks; 5 = 19-22 weeks; 6 = 23-26 weeks.

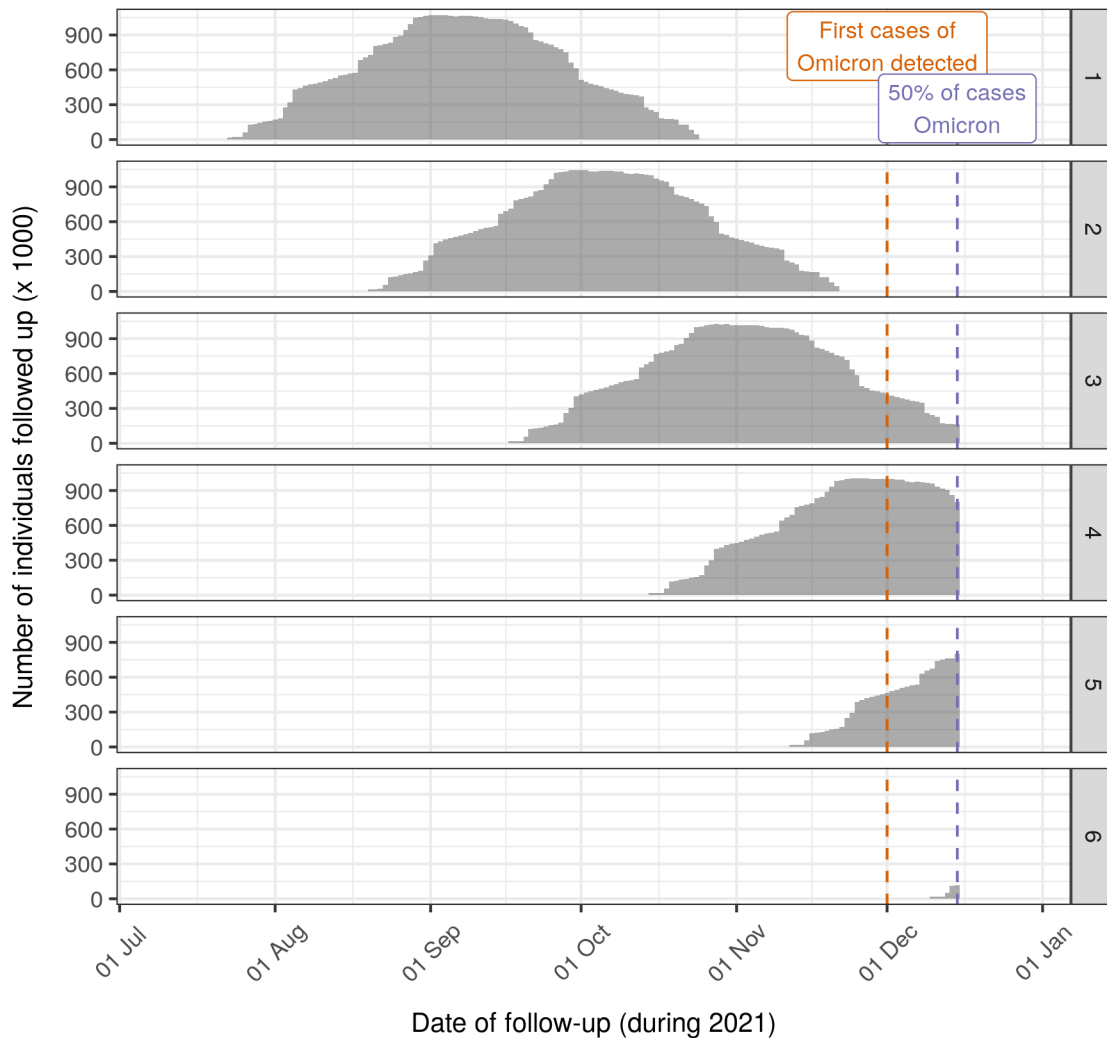

**Supplementary Figure 23:** Distribution of follow-up time across the six comparison periods in the 18-39 years subgroup. Comparison periods (numeric labels on right-hand side of plots) correspond to the following weeks since second vaccine dose: 1 = 3-6 weeks; 2 = 7-10 weeks; 3: 11-14 weeks; 4: 15-18 weeks; 5: 19-22 weeks; 6 = 23-26 weeks.

### Waning vaccine effectiveness in risk-based subgroups

This subsection provides additional results for the waning of vaccine effectiveness across the four risk-based subgroups. Supplementary Table 5 gives the event counts / person-years for each subgroup, outcome and comparison period; Supplementary Tables 6 and 7 give the unadjusted and adjusted hazard ratios (respectively) for each subgroup, outcome and comparison period; Supplementary Table 8 gives the per-comparison-period ratio of adjusted hazard ratios. The unadjusted and adjusted hazard ratios are also plotted in Supplementary Figures 24, 25 and 26 for BNT162b2 vs unvaccinated, ChAdOx1 vs unvaccinated and BNT162b2 vs ChAdOx1 respectively. The unadjusted and adjusted hazard ratios with any SARS-CoV-2 test as the outcome are plotted in Supplementary Figures 27, 28 and Supplementary Figure 29 for BNT162b2 vs unvaccinated, ChAdOx1 vs unvaccinated and BNT162b2 vs ChAdOx1 respectively. The adjusted hazard ratios and lines corresponding to the ratio of hazard ratios with any SARS-CoV-2 test as the outcome are plotted in Supplementary Figure 30 for BNT162b2 vs unvaccinated and ChAdOx1 vs unvaccinated, and Supplementary Figure 31 for BNT162b2 vs ChAdOx1. The hazard ratios corresponding to the covariates in the adjusted models are given in Supplementary Tables 9 to 50.

Supplementary Table 5: Event counts / person-years.

| Outcome                  | Weeks since 2nd dose | 65+ years         |                   |                 | 18-64 years and clinically vulnerable |                   |                   | 40-64 years <sup>a</sup> |                     |                   | 18-39 years <sup>a</sup> |                   |
|--------------------------|----------------------|-------------------|-------------------|-----------------|---------------------------------------|-------------------|-------------------|--------------------------|---------------------|-------------------|--------------------------|-------------------|
|                          |                      | BNT162b2          | ChAdOx1           | Unvaccinated    | BNT162b2                              | ChAdOx1           | Unvaccinated      | BNT162b2                 | ChAdOx1             | Unvaccinated      | BNT162b2                 | Unvaccinated      |
| COVID-19 hospitalisation | 3-6                  | 28 / 63,672       | 42 / 84,088       | 77 / 10,935     | 7 / 28,269                            | 28 / 49,762       | 168 / 22,966      | 7 / 4,832                | 63 / 112,968        | 532 / 47,788      | 21 / 52,714              | 749 / 103,074     |
|                          | 7-10                 | 35 / 63,747       | 91 / 83,948       | 112 / 10,191    | 28 / 28,228                           | 161 / 49,676      | 462 / 20,541      | 7 / 4,826                | 112 / 112,827       | 588 / 45,100      | 28 / 52,381              | 553 / 98,086      |
|                          | 11-14                | 119 / 63,610      | 336 / 83,784      | 196 / 9,625     | 63 / 28,185                           | 301 / 49,578      | 602 / 18,578      | 7 / 4,818                | 119 / 112,690       | 560 / 43,740      | 42 / 52,103              | 539 / 93,860      |
|                          | 15-18                | 301 / 63,449      | 595 / 83,591      | 315 / 9,358     | 105 / 28,134                          | 399 / 49,465      | 504 / 17,460      | 7 / 4,811                | 175 / 112,546       | 504 / 42,456      | 35 / 41,531              | 413 / 66,955      |
|                          | 19-22                | 413 / 63,274      | 756 / 83,382      | 322 / 9,028     | 105 / 28,074                          | 385 / 49,334      | 427 / 16,784      | 7 / 4,597                | 210 / 111,778       | 504 / 38,859      | 21 / 12,835              | 147 / 21,915      |
|                          | 23-26                | 574 / 63,047      | 833 / 83,089      | 336 / 8,884     | 133 / 27,922                          | 504 / 49,034      | 448 / 16,222      | 7 / 1,794                | 259 / 94,855        | 378 / 25,431      | 0 / 50                   | 7 / 554           |
|                          | Total                | 1,470 / 380,799   | 2,653 / 501,882   | 1,358 / 58,021  | 441 / 168,812                         | 1,778 / 296,849   | 2,611 / 112,551   | 42 / 25,678              | 938 / 657,664       | 3,066 / 243,374   | 147 / 211,614            | 2,408 / 384,444   |
| COVID-19 death           | 3-6                  | 7 / 63,675        | 7 / 84,090        | 28 / 10,943     | 0 / 28,270                            | 7 / 49,763        | 14 / 22,976       | 0 / 4,832                | 7 / 112,973         | 21 / 47,825       | 0 / 52,716               | 14 / 103,176      |
|                          | 7-10                 | 7 / 63,752        | 7 / 83,955        | 28 / 10,201     | 7 / 49,683                            | 28 / 20,572       | 0 / 4,826         | 0 / 4,826                | 7 / 112,838         | 28 / 45,178       | 0 / 52,385               | 14 / 98,232       |
|                          | 11-14                | 14 / 63,619       | 35 / 83,805       | 49 / 9,643      | 7 / 28,191                            | 21 / 49,602       | 63 / 18,644       | 0 / 4,819                | 7 / 112,710         | 35 / 43,857       | 0 / 52,109               | 7 / 94,034        |
|                          | 15-18                | 42 / 63,471       | 84 / 83,642       | 63 / 9,391      | 14 / 28,146                           | 28 / 49,514       | 70 / 17,564       | 0 / 4,812                | 7 / 112,576         | 28 / 42,603       | 0 / 41,538               | 7 / 67,111        |
|                          | 19-22                | 98 / 63,318       | 133 / 83,479      | 98 / 9,078      | 14 / 28,092                           | 35 / 49,411       | 70 / 16,911       | 0 / 4,598                | 14 / 111,822        | 42 / 39,023       | 0 / 12,838               | 7 / 21,974        |
|                          | 23-26                | 112 / 63,120      | 126 / 83,232      | 98 / 8,950      | 14 / 27,948                           | 42 / 49,140       | 49 / 16,374       | 0 / 1,795                | 21 / 94,906         | 28 / 25,559       | 0 / 50                   | 0 / 556           |
|                          | Total                | 280 / 380,955     | 392 / 502,203     | 364 / 58,206    | 49 / 168,877                          | 140 / 297,113     | 294 / 113,041     | 0 / 25,682               | 63 / 657,825        | 182 / 244,045     | 0 / 211,636              | 49 / 385,083      |
| Positive SARS-CoV-2 test | 3-6                  | 105 / 63,663      | 252 / 84,070      | 133 / 10,930    | 147 / 28,259                          | 1,400 / 49,706    | 1,561 / 22,900    | 224 / 4,805              | 8,890 / 112,412     | 5,880 / 47,310    | 2,688 / 52,260           | 16,331 / 100,695  |
|                          | 7-10                 | 322 / 63,727      | 1,197 / 83,891    | 231 / 10,181    | 1,414 / 28,175                        | 5,481 / 49,371    | 3,318 / 20,317    | 385 / 4,776              | 13,405 / 111,385    | 5,894 / 44,260    | 4,053 / 51,679           | 13,783 / 94,796   |
|                          | 11-14                | 1,078 / 63,545    | 3,374 / 83,573    | 420 / 9,603     | 2,366 / 27,982                        | 7,679 / 48,783    | 3,878 / 18,141    | 700 / 4,731              | 17,402 / 110,123    | 5,670 / 42,524    | 7,217 / 50,995           | 16,142 / 89,674   |
|                          | 15-18                | 2,275 / 63,277    | 5,411 / 83,082    | 581 / 9,318     | 3,101 / 27,727                        | 8,295 / 48,068    | 3,045 / 16,833    | 1,001 / 4,656            | 20,356 / 108,520    | 5,747 / 40,920    | 11,669 / 40,081          | 13,475 / 63,383   |
|                          | 19-22                | 3,073 / 62,920    | 6,433 / 82,462    | 574 / 8,974     | 3,332 / 27,437                        | 9,800 / 47,311    | 2,688 / 16,014    | 1,358 / 4,371            | 28,231 / 106,037    | 5,845 / 37,144    | 6,188 / 12,089           | 5,075 / 20,555    |
|                          | 23-26                | 4,123 / 62,468    | 8,799 / 81,683    | 609 / 8,810     | 5,103 / 26,972                        | 12,726 / 46,179   | 2,954 / 15,309    | 406 / 1,715              | 27,006 / 88,990     | 4,228 / 24,279    | 35 / 45                  | 154 / 517         |
|                          | Total                | 10,976 / 379,600  | 25,466 / 498,761  | 2,548 / 57,816  | 15,463 / 166,552                      | 45,381 / 289,418  | 17,444 / 109,514  | 4,074 / 25,054           | 115,290 / 637,467   | 33,264 / 236,437  | 31,850 / 207,149         | 64,960 / 369,620  |
| Non-COVID-19 death       | 3-6                  | 847 / 63,675      | 812 / 84,090      | 357 / 10,943    | 133 / 28,270                          | 189 / 49,763      | 147 / 22,976      | 7 / 4,832                | 91 / 112,973        | 91 / 47,825       | 7 / 52,716               | 21 / 103,176      |
|                          | 7-10                 | 1,092 / 63,752    | 966 / 83,955      | 287 / 10,201    | 133 / 28,230                          | 245 / 49,683      | 161 / 20,572      | 7 / 4,826                | 112 / 112,838       | 84 / 45,178       | 7 / 52,385               | 21 / 98,232       |
|                          | 11-14                | 1,281 / 63,619    | 1,148 / 83,805    | 266 / 9,643     | 140 / 28,191                          | 280 / 49,602      | 140 / 18,644      | 7 / 4,819                | 126 / 112,710       | 77 / 43,857       | 7 / 52,109               | 28 / 94,034       |
|                          | 15-18                | 1,330 / 63,471    | 1,246 / 83,642    | 294 / 9,391     | 154 / 28,146                          | 301 / 49,514      | 112 / 17,564      | 7 / 4,812                | 161 / 112,576       | 70 / 42,603       | 7 / 41,538               | 14 / 67,111       |
|                          | 19-22                | 1,393 / 63,318    | 1,183 / 83,479    | 259 / 9,078     | 140 / 28,092                          | 294 / 49,411      | 119 / 16,911      | 14 / 4,598               | 161 / 111,822       | 70 / 39,023       | 0 / 12,838               | 7 / 21,974        |
|                          | 23-26                | 1,561 / 63,120    | 1,358 / 83,232    | 259 / 8,950     | 182 / 27,948                          | 308 / 49,140      | 98 / 16,374       | 7 / 1,795                | 154 / 94,906        | 49 / 25,559       | 0 / 50                   | 0 / 556           |
|                          | Total                | 7,504 / 380,955   | 6,713 / 502,203   | 1,722 / 58,206  | 882 / 168,877                         | 1,617 / 297,113   | 777 / 113,041     | 49 / 25,682              | 805 / 657,825       | 441 / 244,045     | 28 / 211,636             | 91 / 385,083      |
| Any SARS-CoV-2 test      | 3-6                  | 65,310 / 60,849   | 99,890 / 79,562   | 5,936 / 10,430  | 47,677 / 25,944                       | 91,133 / 45,389   | 19,929 / 21,301   | 9,135 / 4,392            | 241,339 / 101,040   | 34,993 / 44,712   | 116,935 / 47,419         | 99,813 / 93,454   |
|                          | 7-10                 | 73,171 / 60,489   | 111,041 / 78,930  | 5,698 / 9,710   | 59,220 / 25,486                       | 108,122 / 44,434  | 20,461 / 18,800   | 10,591 / 4,319           | 249,354 / 99,916    | 34,342 / 41,729   | 117,355 / 46,646         | 84,399 / 88,423   |
|                          | 11-14                | 80,465 / 59,981   | 120,351 / 78,150  | 5,621 / 9,149   | 56,518 / 25,344                       | 101,612 / 44,324  | 19,572 / 16,747   | 11,102 / 4,249           | 250,229 / 99,375    | 33,040 / 40,057   | 114,527 / 46,275         | 77,672 / 84,452   |
|                          | 15-18                | 80,192 / 59,747   | 118,475 / 77,906  | 5,761 / 8,871   | 57,750 / 25,281                       | 107,254 / 43,558  | 17,808 / 15,533   | 11,466 / 4,167           | 273,966 / 96,413    | 30,947 / 38,621   | 113,869 / 36,314         | 60,823 / 60,574   |
|                          | 19-22                | 85,946 / 59,284   | 131,397 / 76,887  | 5,579 / 8,535   | 63,609 / 24,634                       | 114,597 / 42,433  | 16,716 / 14,734   | 12,243 / 3,899           | 281,904 / 94,053    | 28,770 / 35,238   | 53,984 / 10,881          | 23,877 / 20,007   |
|                          | 23-26                | 94,416 / 58,489   | 143,213 / 75,680  | 5,614 / 8,364   | 64,771 / 24,155                       | 113,400 / 41,419  | 15,316 / 14,189   | 5,516 / 1,551            | 250,572 / 79,312    | 20,951 / 23,245   | 413 / 44                 | 896 / 515         |
|                          | Total                | 479,500 / 358,839 | 724,367 / 467,115 | 34,209 / 55,059 | 349,545 / 150,844                     | 636,118 / 261,557 | 109,802 / 101,304 | 60,053 / 22,577          | 1,547,364 / 570,109 | 183,043 / 223,602 | 517,083 / 187,579        | 347,480 / 347,425 |

<sup>a</sup> And not clinically vulnerable



**Supplementary Table 6: Unadjusted hazard ratios for effect of vaccination.**

| Outcome                  | Weeks since 2nd dose | 65+ years                |                         |                     | 18-64 years and clinically vulnerable |                         |                     | 40-64 years <sup>a</sup> |                         |                     | 18-39 years <sup>a</sup> |
|--------------------------|----------------------|--------------------------|-------------------------|---------------------|---------------------------------------|-------------------------|---------------------|--------------------------|-------------------------|---------------------|--------------------------|
|                          |                      | BNT162b2 vs unvaccinated | ChAdOx1 vs unvaccinated | BNT162b2 vs ChAdOx1 | BNT162b2 vs unvaccinated              | ChAdOx1 vs unvaccinated | BNT162b2 vs ChAdOx1 | BNT162b2 vs unvaccinated | ChAdOx1 vs unvaccinated | BNT162b2 vs ChAdOx1 | BNT162b2 vs unvaccinated |
| COVID-19 hospitalisation | 3-6                  | 0.07 (0.04-0.11)         | 0.13 (0.08-0.20)        | 0.54 (0.30-0.96)    | 0.05 (0.02-0.12)                      | 0.10 (0.06-0.16)        | 0.51 (0.17-1.54)    | -                        | 0.06 (0.04-0.08)        | -                   | 0.04 (0.02-0.06)         |
|                          | 7-10                 | 0.07 (0.04-0.10)         | 0.10 (0.07-0.13)        | 0.51 (0.33-0.80)    | 0.05 (0.04-0.08)                      | 0.14 (0.11-0.17)        | 0.38 (0.24-0.58)    | -                        | 0.06 (0.05-0.07)        | -                   | 0.09 (0.06-0.13)         |
|                          | 11-14                | 0.10 (0.08-0.13)         | 0.15 (0.12-0.19)        | 0.55 (0.44-0.69)    | 0.06 (0.05-0.08)                      | 0.17 (0.15-0.20)        | 0.39 (0.29-0.51)    | -                        | 0.06 (0.04-0.07)        | -                   | 0.12 (0.08-0.16)         |
|                          | 15-18                | 0.13 (0.11-0.15)         | 0.18 (0.15-0.21)        | 0.62 (0.53-0.73)    | 0.10 (0.08-0.13)                      | 0.24 (0.21-0.28)        | 0.45 (0.35-0.56)    | -                        | 0.12 (0.10-0.14)        | -                   | 0.11 (0.07-0.16)         |
|                          | 19-22                | 0.15 (0.13-0.18)         | 0.23 (0.20-0.27)        | 0.57 (0.49-0.65)    | 0.12 (0.10-0.16)                      | 0.27 (0.23-0.32)        | 0.53 (0.42-0.67)    | -                        | 0.12 (0.10-0.15)        | -                   | 0.20 (0.12-0.32)         |
|                          | 23-26                | 0.22 (0.19-0.26)         | 0.28 (0.24-0.33)        | 0.69 (0.61-0.79)    | 0.16 (0.13-0.19)                      | 0.33 (0.28-0.37)        | 0.49 (0.40-0.60)    | -                        | 0.16 (0.13-0.19)        | -                   | -                        |
| COVID-19 death           | 3-6                  | 0.02 (0.01-0.07)         | -                       | -                   | -                                     | -                       | -                   | -                        | -                       | -                   | -                        |
|                          | 7-10                 | -                        | 0.03 (0.01-0.09)        | -                   | -                                     | 0.08 (0.03-0.25)        | -                   | -                        | -                       | -                   | -                        |
|                          | 11-14                | 0.04 (0.02-0.08)         | 0.07 (0.04-0.11)        | 0.57 (0.29-1.14)    | -                                     | 0.12 (0.07-0.20)        | -                   | -                        | 0.02 (0.01-0.07)        | -                   | -                        |
|                          | 15-18                | 0.09 (0.06-0.14)         | 0.13 (0.08-0.19)        | 0.58 (0.35-0.94)    | 0.07 (0.03-0.14)                      | 0.15 (0.09-0.23)        | 0.51 (0.21-1.23)    | -                        | 0.04 (0.02-0.10)        | -                   | -                        |
|                          | 19-22                | 0.11 (0.08-0.15)         | 0.12 (0.09-0.17)        | 0.67 (0.50-0.91)    | 0.16 (0.09-0.29)                      | 0.18 (0.11-0.28)        | 0.99 (0.51-1.90)    | -                        | 0.05 (0.03-0.10)        | -                   | -                        |
|                          | 23-26                | 0.13 (0.10-0.18)         | 0.19 (0.13-0.26)        | 0.64 (0.48-0.86)    | 0.19 (0.09-0.38)                      | 0.27 (0.17-0.42)        | 0.59 (0.30-1.14)    | -                        | 0.10 (0.05-0.21)        | -                   | -                        |
| Positive SARS-CoV-2 test | 3-6                  | 0.20 (0.15-0.28)         | 0.51 (0.39-0.67)        | 0.67 (0.52-0.87)    | 0.17 (0.14-0.21)                      | 0.61 (0.56-0.66)        | 0.33 (0.27-0.39)    | 0.33 (0.29-0.38)         | 0.91 (0.88-0.95)        | 0.37 (0.32-0.42)    | 0.31 (0.30-0.32)         |
|                          | 7-10                 | 0.40 (0.32-0.48)         | 0.76 (0.65-0.90)        | 0.55 (0.48-0.62)    | 0.31 (0.29-0.34)                      | 0.65 (0.62-0.68)        | 0.50 (0.47-0.53)    | 0.56 (0.50-0.63)         | 1.06 (1.02-1.10)        | 0.49 (0.44-0.54)    | 0.53 (0.51-0.55)         |
|                          | 11-14                | 0.49 (0.43-0.56)         | 0.82 (0.73-0.93)        | 0.61 (0.57-0.66)    | 0.38 (0.36-0.40)                      | 0.73 (0.70-0.77)        | 0.56 (0.54-0.59)    | 0.94 (0.86-1.02)         | 1.46 (1.41-1.51)        | 0.57 (0.53-0.61)    | 0.75 (0.73-0.77)         |
|                          | 15-18                | 0.64 (0.57-0.71)         | 0.95 (0.86-1.04)        | 0.70 (0.66-0.73)    | 0.54 (0.51-0.57)                      | 0.93 (0.89-0.98)        | 0.62 (0.59-0.65)    | 1.24 (1.15-1.33)         | 1.86 (1.80-1.92)        | 0.63 (0.59-0.67)    | 1.26 (1.23-1.29)         |
|                          | 19-22                | 0.75 (0.68-0.84)         | 1.18 (1.07-1.30)        | 0.71 (0.68-0.74)    | 0.80 (0.75-0.85)                      | 1.24 (1.19-1.30)        | 0.66 (0.63-0.69)    | 1.54 (1.44-1.65)         | 2.14 (2.07-2.21)        | 0.68 (0.64-0.72)    | 1.91 (1.84-1.99)         |
|                          | 23-26                | 1.08 (0.97-1.19)         | 1.59 (1.45-1.75)        | 0.75 (0.72-0.78)    | 0.93 (0.88-0.98)                      | 1.41 (1.35-1.47)        | 0.68 (0.66-0.70)    | 1.36 (1.21-1.52)         | 2.27 (2.19-2.36)        | 0.58 (0.53-0.64)    | 2.63 (1.75-3.97)         |
| Non-COVID-19 death       | 3-6                  | 0.33 (0.28-0.38)         | 0.46 (0.39-0.55)        | 0.80 (0.71-0.91)    | 0.68 (0.52-0.90)                      | 0.52 (0.41-0.66)        | 1.30 (1.03-1.65)    | -                        | 0.29 (0.20-0.41)        | -                   | -                        |
|                          | 7-10                 | 0.46 (0.40-0.53)         | 0.59 (0.49-0.72)        | 0.84 (0.75-0.94)    | 0.51 (0.39-0.67)                      | 0.49 (0.40-0.61)        | 1.03 (0.82-1.29)    | -                        | 0.29 (0.21-0.41)        | -                   | -                        |
|                          | 11-14                | 0.55 (0.47-0.64)         | 0.69 (0.58-0.82)        | 0.86 (0.78-0.94)    | 0.56 (0.43-0.73)                      | 0.57 (0.46-0.71)        | 0.95 (0.77-1.18)    | -                        | 0.49 (0.36-0.68)        | -                   | -                        |
|                          | 15-18                | 0.52 (0.45-0.60)         | 0.68 (0.58-0.81)        | 0.82 (0.74-0.90)    | 0.79 (0.60-1.05)                      | 0.87 (0.68-1.11)        | 1.00 (0.81-1.24)    | -                        | 0.61 (0.42-0.87)        | -                   | -                        |
|                          | 19-22                | 0.62 (0.53-0.72)         | 0.70 (0.58-0.85)        | 0.93 (0.85-1.03)    | 0.68 (0.51-0.90)                      | 0.75 (0.59-0.96)        | 0.90 (0.72-1.11)    | -                        | 0.55 (0.39-0.79)        | -                   | -                        |
|                          | 23-26                | 0.62 (0.53-0.71)         | 0.75 (0.63-0.89)        | 0.90 (0.83-0.99)    | 0.96 (0.73-1.28)                      | 1.02 (0.78-1.32)        | 1.04 (0.85-1.26)    | -                        | 0.56 (0.40-0.80)        | -                   | -                        |
| Any SARS-CoV-2 test      | 3-6                  | 2.14 (2.08-2.20)         | 2.84 (2.76-2.93)        | 0.86 (0.85-0.87)    | 2.24 (2.20-2.28)                      | 2.50 (2.46-2.55)        | 0.77 (0.76-0.78)    | 2.91 (2.83-2.99)         | 3.75 (3.70-3.79)        | 0.92 (0.90-0.94)    | 2.35 (2.33-2.37)         |
|                          | 7-10                 | 2.44 (2.37-2.52)         | 2.98 (2.89-3.07)        | 0.86 (0.85-0.87)    | 2.09 (2.05-2.13)                      | 2.34 (2.31-2.38)        | 0.78 (0.78-0.79)    | 2.96 (2.89-3.04)         | 3.52 (3.47-3.56)        | 0.89 (0.87-0.91)    | 2.73 (2.70-2.75)         |
|                          | 11-14                | 2.48 (2.40-2.55)         | 2.96 (2.87-3.05)        | 0.87 (0.86-0.88)    | 1.99 (1.96-2.03)                      | 2.20 (2.17-2.24)        | 0.82 (0.81-0.83)    | 3.32 (3.24-3.41)         | 3.68 (3.63-3.73)        | 0.91 (0.89-0.93)    | 2.81 (2.78-2.84)         |
|                          | 15-18                | 2.42 (2.35-2.50)         | 2.90 (2.82-2.99)        | 0.86 (0.86-0.87)    | 1.97 (1.93-2.00)                      | 2.25 (2.22-2.29)        | 0.82 (0.81-0.83)    | 3.62 (3.53-3.71)         | 4.09 (4.04-4.14)        | 0.92 (0.90-0.94)    | 3.22 (3.19-3.26)         |
|                          | 19-22                | 2.56 (2.48-2.64)         | 3.12 (3.02-3.21)        | 0.87 (0.86-0.88)    | 2.25 (2.20-2.29)                      | 2.53 (2.49-2.58)        | 0.82 (0.81-0.83)    | 3.81 (3.72-3.91)         | 4.34 (4.28-4.40)        | 0.91 (0.90-0.93)    | 4.53 (4.46-4.61)         |
|                          | 23-26                | 2.77 (2.68-2.85)         | 3.31 (3.21-3.41)        | 0.88 (0.87-0.89)    | 2.44 (2.39-2.49)                      | 2.72 (2.67-2.77)        | 0.82 (0.82-0.83)    | 4.33 (4.18-4.49)         | 4.96 (4.88-5.04)        | 0.84 (0.82-0.86)    | 5.97 (5.25-6.77)         |

<sup>a</sup> And not clinically vulnerable

**Supplementary Table 7: Adjusted hazard ratios for effect of vaccination.**

| Outcome                  | Weeks since 2nd dose | 65+ years                |                         |                     | 18-64 years and clinically vulnerable |                         |                     | 40-64 years <sup>a</sup> |                         |                     | 18-39 years <sup>a</sup> |
|--------------------------|----------------------|--------------------------|-------------------------|---------------------|---------------------------------------|-------------------------|---------------------|--------------------------|-------------------------|---------------------|--------------------------|
|                          |                      | BNT162b2 vs unvaccinated | ChAdOx1 vs unvaccinated | BNT162b2 vs ChAdOx1 | BNT162b2 vs unvaccinated              | ChAdOx1 vs unvaccinated | BNT162b2 vs ChAdOx1 | BNT162b2 vs unvaccinated | ChAdOx1 vs unvaccinated | BNT162b2 vs ChAdOx1 | BNT162b2 vs unvaccinated |
| COVID-19 hospitalisation | 3-6                  | 0.08 (0.05-0.13)         | 0.13 (0.08-0.23)        | 0.55 (0.31-0.98)    | 0.05 (0.02-0.12)                      | 0.09 (0.06-0.14)        | 0.51 (0.17-1.56)    | -                        | 0.05 (0.04-0.07)        | -                   | 0.04 (0.02-0.07)         |
|                          | 7-10                 | 0.07 (0.04-0.11)         | 0.11 (0.07-0.15)        | 0.51 (0.33-0.79)    | 0.04 (0.02-0.06)                      | 0.10 (0.08-0.13)        | 0.36 (0.23-0.55)    | -                        | 0.05 (0.04-0.07)        | -                   | 0.09 (0.06-0.14)         |
|                          | 11-14                | 0.09 (0.07-0.12)         | 0.09 (0.07-0.11)        | 0.55 (0.44-0.68)    | 0.05 (0.04-0.06)                      | 0.14 (0.12-0.16)        | 0.38 (0.29-0.50)    | -                        | 0.05 (0.04-0.07)        | -                   | 0.11 (0.08-0.16)         |
|                          | 15-18                | 0.13 (0.10-0.16)         | 0.18 (0.15-0.22)        | 0.63 (0.54-0.74)    | 0.08 (0.06-0.10)                      | 0.19 (0.16-0.22)        | 0.44 (0.35-0.55)    | -                        | 0.09 (0.07-0.12)        | -                   | 0.10 (0.07-0.15)         |
|                          | 19-22                | 0.15 (0.12-0.19)         | 0.21 (0.18-0.26)        | 0.57 (0.50-0.65)    | 0.08 (0.06-0.10)                      | 0.19 (0.16-0.23)        | 0.51 (0.40-0.65)    | -                        | 0.11 (0.09-0.14)        | -                   | 0.18 (0.10-0.29)         |
|                          | 23-26                | 0.20 (0.17-0.25)         | 0.25 (0.21-0.29)        | 0.69 (0.61-0.78)    | 0.09 (0.07-0.12)                      | 0.23 (0.19-0.26)        | 0.47 (0.38-0.57)    | -                        | 0.12 (0.10-0.15)        | -                   | -                        |
| COVID-19 death           | 3-6                  | 0.02 (0.01-0.07)         | -                       | -                   | -                                     | -                       | -                   | -                        | -                       | -                   | -                        |
|                          | 7-10                 | -                        | 0.04 (0.02-0.09)        | -                   | -                                     | 0.05 (0.02-0.16)        | -                   | -                        | -                       | -                   | -                        |
|                          | 11-14                | -                        | -                       | -                   | -                                     | 0.07 (0.04-0.13)        | -                   | -                        | 0.02 (0.01-0.07)        | -                   | -                        |
|                          | 15-18                | 0.07 (0.04-0.13)         | 0.11 (0.07-0.18)        | 0.58 (0.36-0.94)    | 0.04 (0.02-0.09)                      | 0.10 (0.06-0.15)        | 0.49 (0.20-1.18)    | -                        | 0.04 (0.01-0.09)        | -                   | -                        |
|                          | 19-22                | 0.10 (0.07-0.15)         | 0.11 (0.08-0.16)        | 0.67 (0.49-0.90)    | 0.10 (0.05-0.18)                      | 0.11 (0.07-0.19)        | 1.00 (0.52-1.93)    | -                        | 0.05 (0.03-0.10)        | -                   | -                        |
|                          | 23-26                | 0.12 (0.08-0.17)         | 0.15 (0.11-0.21)        | 0.65 (0.48-0.86)    | 0.08 (0.04-0.18)                      | 0.13 (0.08-0.20)        | 0.54 (0.28-1.05)    | -                        | 0.10 (0.04-0.22)        | -                   | -                        |
| Positive SARS-CoV-2 test | 3-6                  | 0.19 (0.13-0.27)         | 0.43 (0.32-0.58)        | 0.68 (0.52-0.88)    | 0.22 (0.18-0.27)                      | 0.75 (0.69-0.82)        | 0.35 (0.29-0.41)    | 0.27 (0.23-0.31)         | 0.78 (0.75-0.81)        | 0.37 (0.33-0.43)    | 0.24 (0.23-0.26)         |
|                          | 7-10                 | 0.35 (0.28-0.44)         | 0.70 (0.59-0.84)        | 0.55 (0.48-0.62)    | 0.38 (0.35-0.41)                      | 0.77 (0.73-0.81)        | 0.52 (0.49-0.56)    | 0.45 (0.41-0.51)         | 0.93 (0.90-0.97)        | 0.50 (0.45-0.55)    | 0.41 (0.40-0.43)         |
|                          | 11-14                | 0.41 (0.35-0.47)         | 0.70 (0.62-0.80)        | 0.61 (0.57-0.66)    | 0.45 (0.42-0.48)                      | 0.85 (0.81-0.89)        | 0.58 (0.56-0.61)    | 0.75 (0.68-0.82)         | 1.25 (1.20-1.30)        | 0.58 (0.53-0.62)    | 0.58 (0.56-0.60)         |
|                          | 15-18                | 0.56 (0.50-0.64)         | 0.82 (0.73-0.91)        | 0.70 (0.66-0.73)    | 0.57 (0.53-0.61)                      | 0.99 (0.94-1.04)        | 0.64 (0.61-0.67)    | 0.95 (0.88-1.02)         | 1.54 (1.49-1.60)        | 0.64 (0.60-0.68)    | 0.96 (0.93-0.99)         |
|                          | 19-22                | 0.66 (0.58-0.74)         | 1.00 (0.90-1.11)        | 0.71 (0.68-0.74)    | 0.81 (0.76-0.87)                      | 1.22 (1.16-1.28)        | 0.68 (0.65-0.71)    | 1.21 (1.13-1.29)         | 1.75 (1.69-1.81)        | 0.69 (0.65-0.73)    | 1.42 (1.36-1.49)         |
|                          | 23-26                | 0.87 (0.78-0.97)         | 1.23 (1.11-1.36)        | 0.75 (0.72-0.78)    | 0.90 (0.84-0.95)                      | 1.35 (1.29-1.41)        | 0.70 (0.67-0.72)    | 1.01 (0.90-1.14)         | 1.86 (1.79-1.93)        | 0.59 (0.54-0.65)    | 1.72 (1.11-2.68)         |
| Non-COVID-19 death       | 3-6                  | 0.29 (0.24-0.35)         | 0.36 (0.30-0.44)        | 0.84 (0.74-0.95)    | 0.47 (0.34-0.64)                      | 0.36 (0.27-0.46)        | 1.24 (0.97-1.57)    | -                        | 0.29 (0.20-0.44)        | -                   | -                        |
|                          | 7-10                 | 0.42 (0.35-0.50)         | 0.52 (0.42-0.64)        | 0.87 (0.78-0.97)    | 0.30 (0.22-0.42)                      | 0.30 (0.24-0.39)        | 0.98 (0.78-1.23)    | -                        | 0.33 (0.23-0.47)        | -                   | -                        |
|                          | 11-14                | 0.51 (0.43-0.62)         | 0.64 (0.53-0.79)        | 0.88 (0.80-0.97)    | 0.32 (0.23-0.44)                      | 0.36 (0.28-0.46)        | 0.91 (0.73-1.13)    | -                        | 0.51 (0.36-0.72)        | -                   | -                        |
|                          | 15-18                | 0.49 (0.41-0.59)         | 0.61 (0.51-0.74)        | 0.84 (0.77-0.92)    | 0.46 (0.33-0.64)                      | 0.63 (0.48-0.84)        | 0.96 (0.78-1.18)    | -                        | 0.65 (0.44-0.95)        | -                   | -                        |
|                          | 19-22                | 0.59 (0.49-0.71)         | 0.68 (0.56-0.84)        | 0.96 (0.87-1.06)    | 0.43 (0.31-0.60)                      | 0.51 (0.39-0.66)        | 0.85 (0.69-1.06)    | -                        | 0.64 (0.44-0.93)        | -                   | -                        |
|                          | 23-26                | 0.58 (0.48-0.69)         | 0.74 (0.61-0.90)        | 0.93 (0.85-1.02)    | 0.55 (0.40-0.76)                      | 0.70 (0.52-0.93)        | 0.98 (0.80-1.19)    | -                        | 0.64 (0.43-0.95)        | -                   | -                        |
| Any SARS-CoV-2 test      | 3-6                  | 1.55 (1.50-1.61)         | 2.01 (1.95-2.08)        | 0.86 (0.85-0.87)    | 2.04 (2.00-2.09)                      | 2.23 (2.19-2.27)        | 0.79 (0.78-0.79)    | 2.09 (2.03-2.15)         | 2.79 (2.75-2.83)        | 0.93 (0.91-0.95)    | 1.83 (1.81-1.85)         |
|                          | 7-10                 | 1.78 (1.73-1.84)         | 2.09 (2.03-2.16)        | 0.87 (0.86-0.88)    | 1.94 (1.90-1.98)                      | 2.10 (2.07-2.14)        | 0.80 (0.79-0.81)    | 2.15 (2.09-2.21)         | 2.67 (2.63-2.70)        | 0.90 (0.88-0.92)    | 2.10 (2.07-2.12)         |
|                          | 11-14                | 1.81 (1.75-1.87)         | 2.12 (2.05-2.19)        | 0.87 (0.87-0.88)    | 1.83 (1.79-1.87)                      | 1.98 (1.95-2.02)        | 0.83 (0.82-0.84)    | 2.41 (2.35-2.48)         | 2.82 (2.78-2.85)        | 0.92 (0.90-0.94)    | 2.14 (2.11-2.16)         |
|                          | 15-18                | 1.81 (1.75-1.87)         | 2.10 (2.03-2.17)        | 0.87 (0.86-0.88)    | 1.77 (1.74-1.81)                      | 2.00 (1.97-2.04)        | 0.83 (0.82-0.84)    | 2.59 (2.52-2.67)         | 3.10 (3.06-3.15)        | 0.92 (0.91-0.94)    | 2.41 (2.38-2.44)         |
|                          | 19-22                | 1.90 (1.84-1.96)         | 2.25 (2.18-2.33)        | 0.87 (0.87-0.88)    | 1.99 (1.95-2.03)                      | 2.20 (2.16-2.24)        | 0.84 (0.83-0.85)    | 2.72 (2.65-2.80)         | 3.29 (3.24-3.33)        | 0.92 (0.90-0.94)    | 3.14 (3.08-3.20)         |
|                          | 23-26                | 2.06 (2.00-2.13)         | 2.36 (2.29-2.44)        | 0.89 (0.88-0.90)    | 2.09 (2.04-2.13)                      | 2.31 (2.27-2.36)        | 0.83 (0.83-0.84)    | 2.93 (2.82-3.05)         | 3.70 (3.64-3.76)        | 0.85 (0.82-0.87)    | 3.06 (2.66-3.53)         |

<sup>a</sup> And not clinically vulnerable

**Supplementary Table 8: Per-comparison-period ratio of adjusted hazard ratios for effect of vaccination.**

| Outcome                  | 65+ years                |                         |                     | 18-64 years and clinically vulnerable |                         |                     | 40-64 years <sup>a</sup> |                         |                     | 18-39 years <sup>a</sup> |
|--------------------------|--------------------------|-------------------------|---------------------|---------------------------------------|-------------------------|---------------------|--------------------------|-------------------------|---------------------|--------------------------|
|                          | BNT162b2 vs unvaccinated | ChAdOx1 vs unvaccinated | BNT162b2 vs ChAdOx1 | BNT162b2 vs unvaccinated              | ChAdOx1 vs unvaccinated | BNT162b2 vs ChAdOx1 | BNT162b2 vs unvaccinated | ChAdOx1 vs unvaccinated | BNT162b2 vs ChAdOx1 | BNT162b2 vs unvaccinated |
| COVID-19 hospitalisation | 1.26 (1.17-1.36)         | 1.23 (1.07-1.40)        | 1.06 (0.99-1.13)    | 1.23 (1.13-1.35)                      | 1.20 (1.14-1.27)        | 1.07 (0.98-1.16)    | -                        | 1.24 (1.16-1.33)        | -                   | 1.31 (1.10-1.57)         |
| COVID-19 death           | 1.34 (1.09-1.64)         | 1.31 (1.07-1.61)        | 1.03 (0.79-1.35)    | 1.38 (0.77-2.47)                      | 1.21 (0.99-1.49)        | 1.02 (0.46-2.26)    | -                        | 1.66 (1.08-2.55)        | -                   | -                        |
| Positive SARS-CoV-2 test | 1.29 (1.23-1.35)         | 1.19 (1.14-1.24)        | 1.06 (1.03-1.09)    | 1.30 (1.23-1.36)                      | 1.14 (1.11-1.17)        | 1.12 (1.05-1.18)    | 1.32 (1.17-1.49)         | 1.20 (1.16-1.25)        | 1.10 (1.03-1.17)    | 1.54 (1.50-1.59)         |
| Non-COVID-19 death       | 1.13 (1.07-1.21)         | 1.13 (1.07-1.20)        | 1.02 (1.00-1.05)    | 1.07 (0.96-1.19)                      | 1.17 (1.07-1.29)        | 0.96 (0.91-1.01)    | 1.07 (0.77-1.47)         | 1.19 (1.09-1.31)        | 1.07 (0.77-1.49)    | 0.91 (0.56-1.46)         |
| Any SARS-CoV-2 test      | 1.05 (1.03-1.07)         | 1.03 (1.02-1.04)        | 1.00 (1.00-1.01)    | 1.00 (0.97-1.04)                      | 1.01 (0.98-1.04)        | 1.01 (1.01-1.02)    | 1.07 (1.06-1.08)         | 1.06 (1.04-1.09)        | 0.99 (0.98-1.00)    | 1.12 (1.08-1.16)         |

<sup>a</sup> And not clinically vulnerable

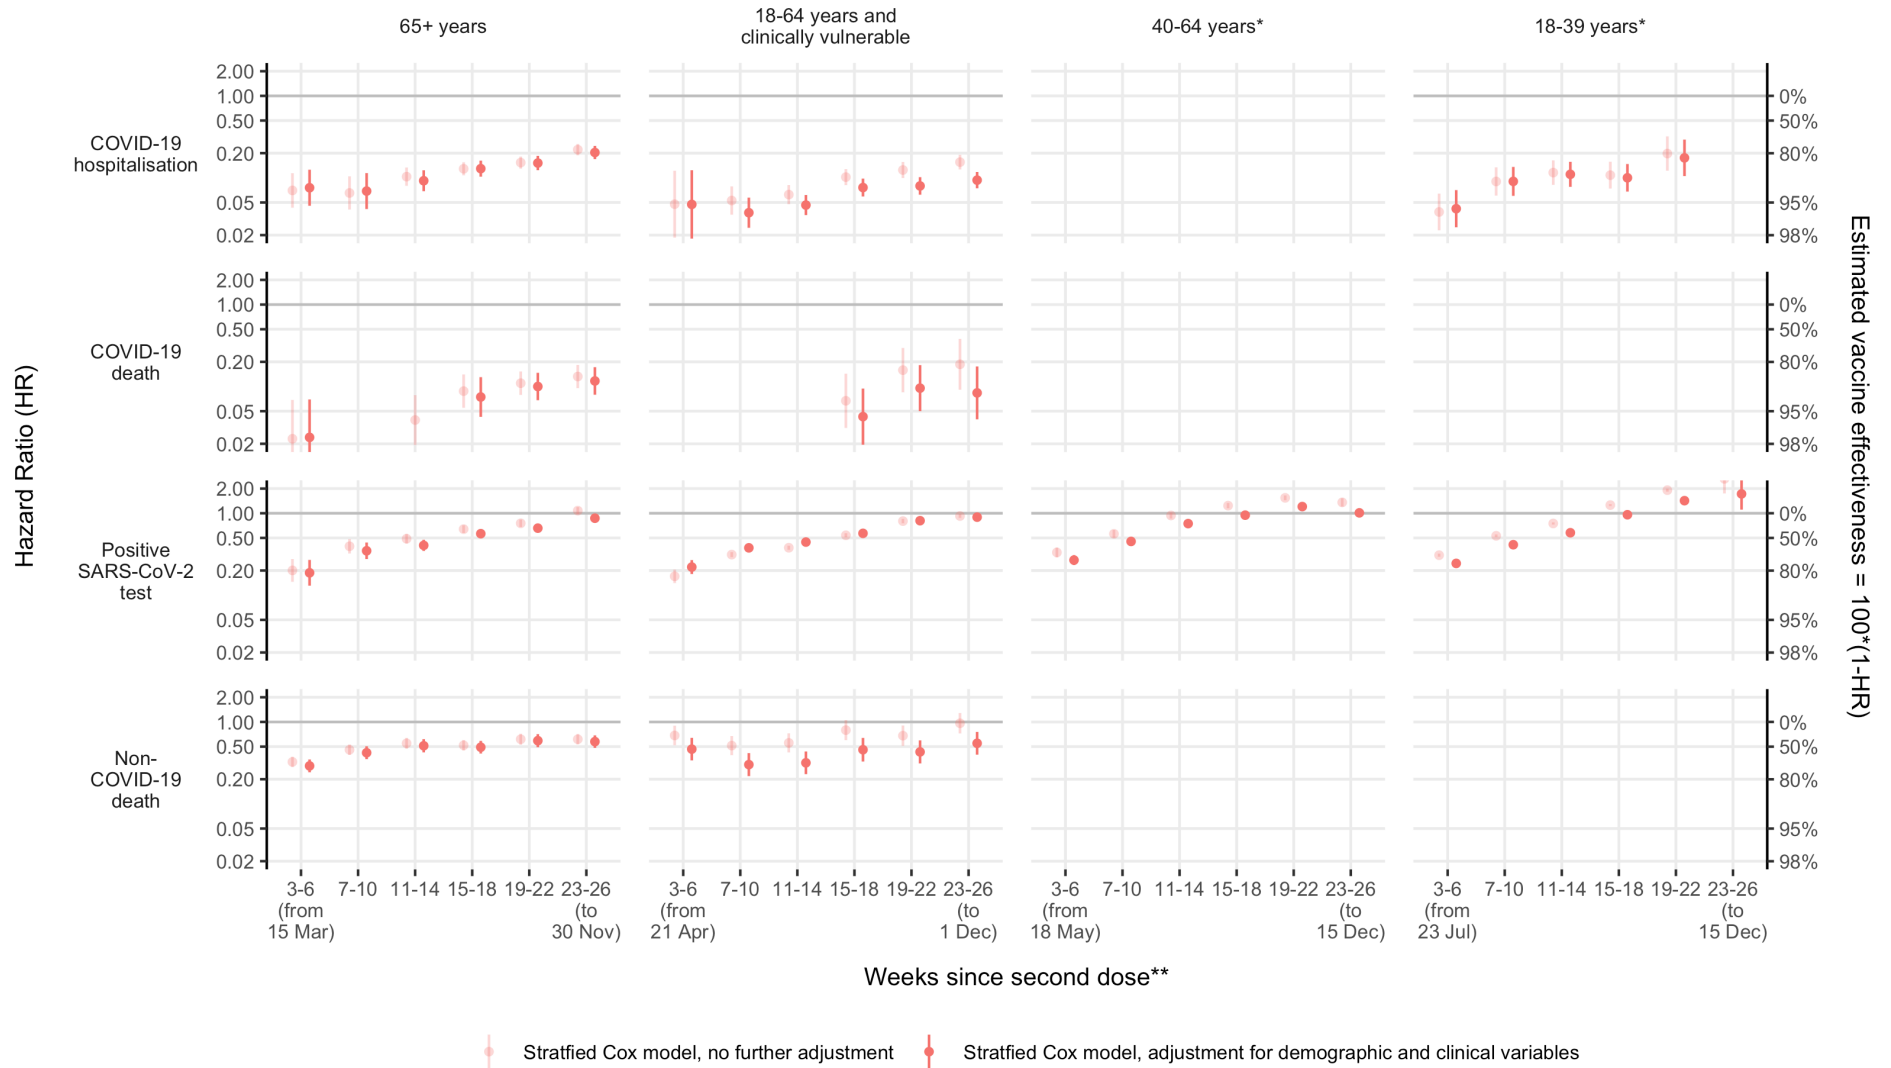

**Supplementary Figure 24:** Unadjusted and adjusted hazard ratios for BNT162b2 vs unvaccinated

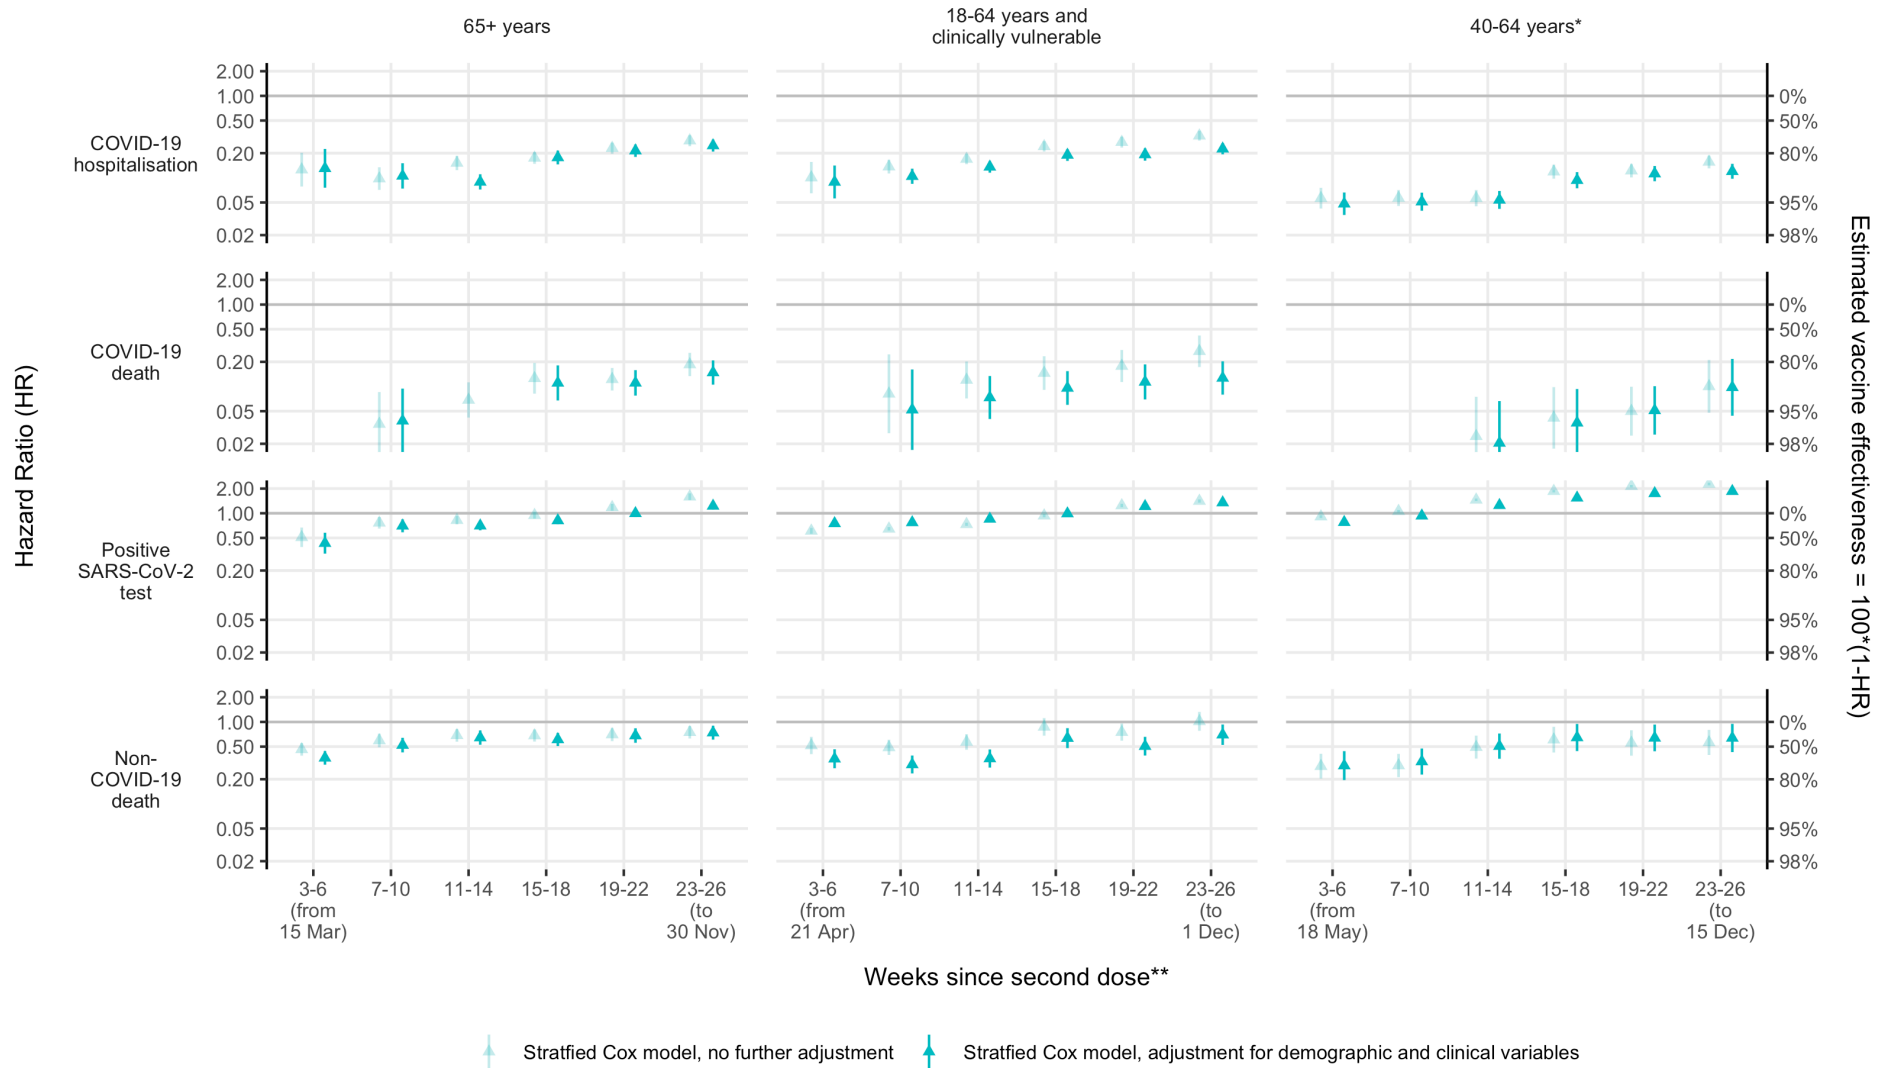

**Supplementary Figure 25:** Unadjusted and adjusted hazard ratios for ChAdOx1 vs unvaccinated

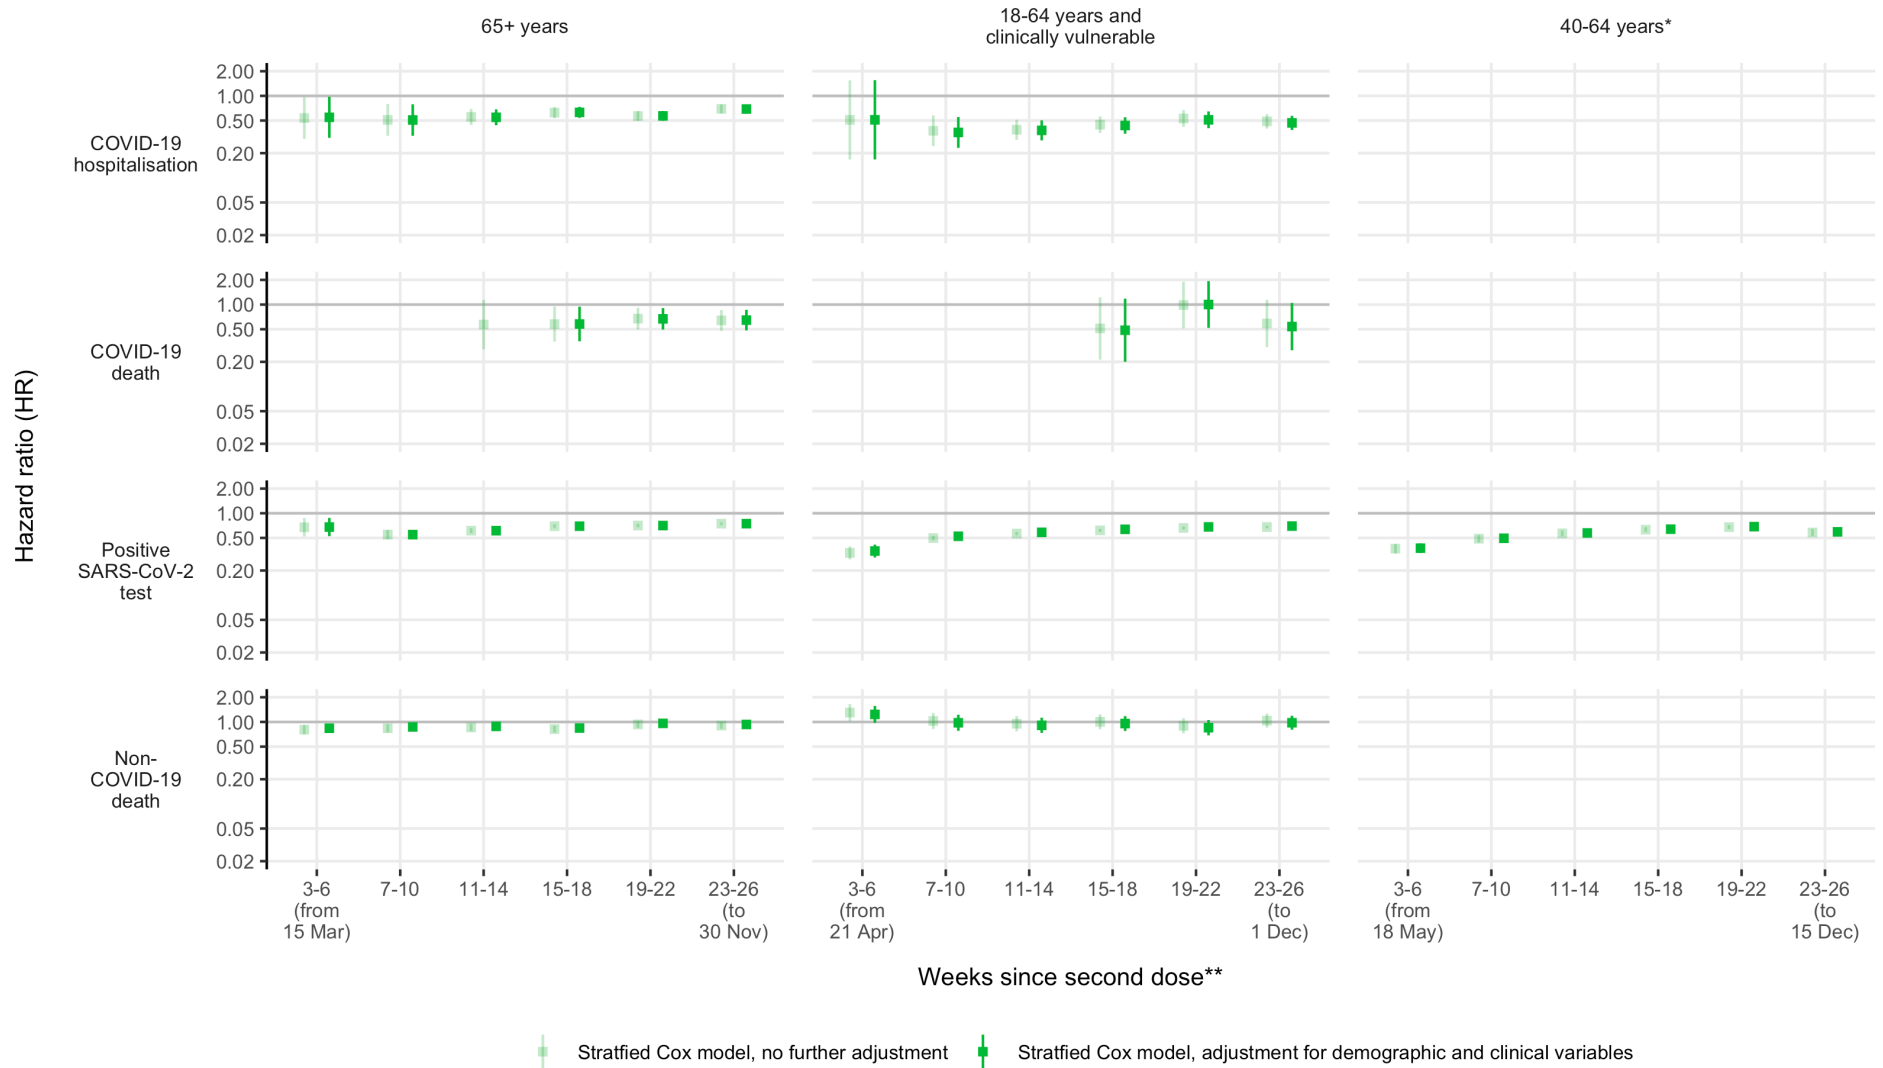

**Supplementary Figure 26:** Unadjusted and adjusted hazard ratios for BNT162b2 vs ChAdOx1

Any SARS-CoV-2 test

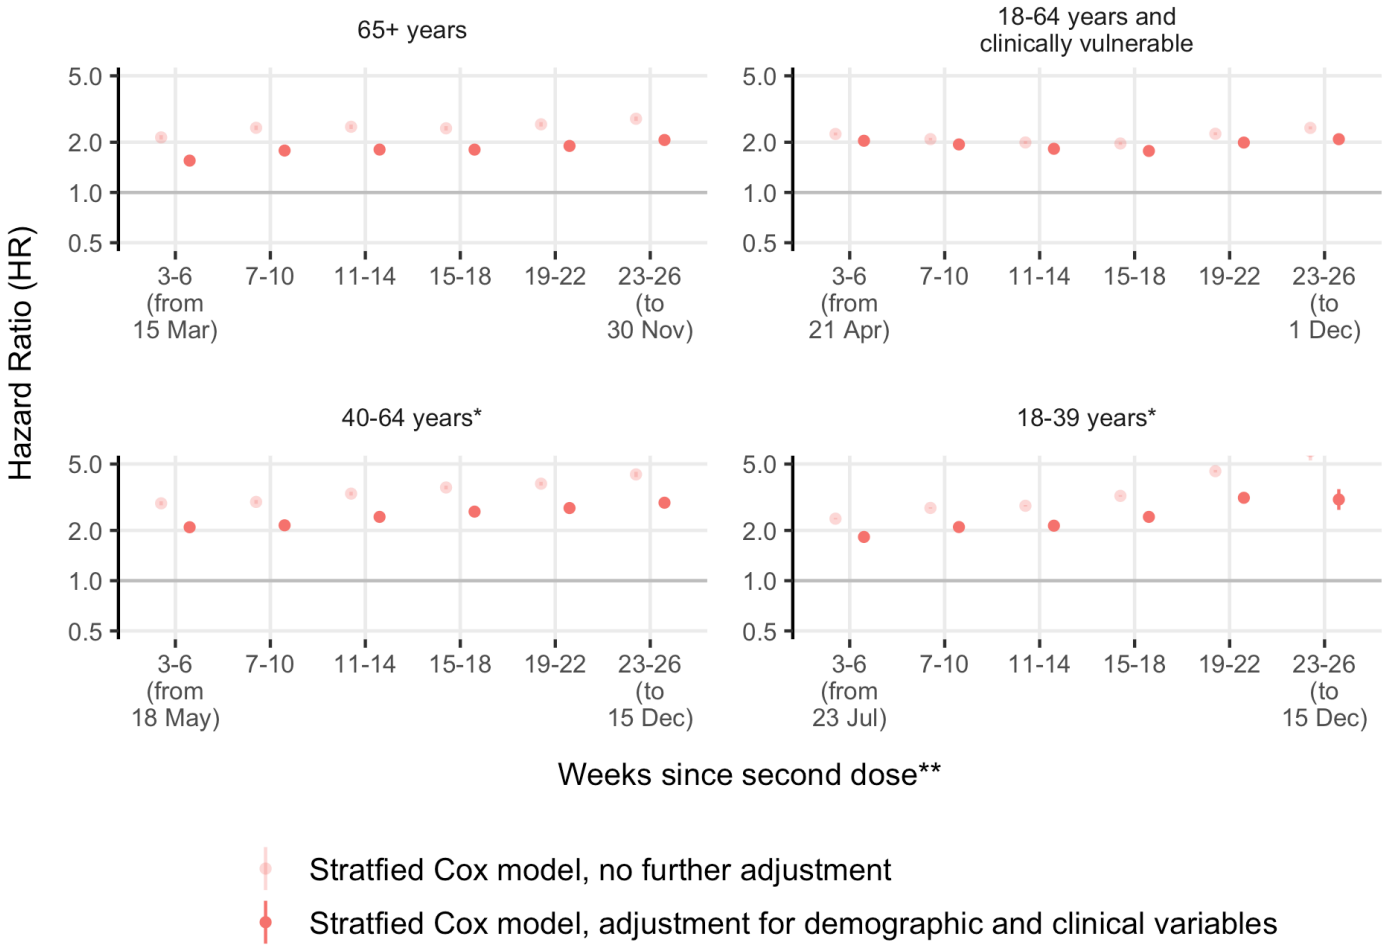

Supplementary Figure 27: Unadjusted and adjusted hazard ratios for any SARS-CoV-2 test for BNT162b2 vs unvaccinated

Any SARS-CoV-2 test

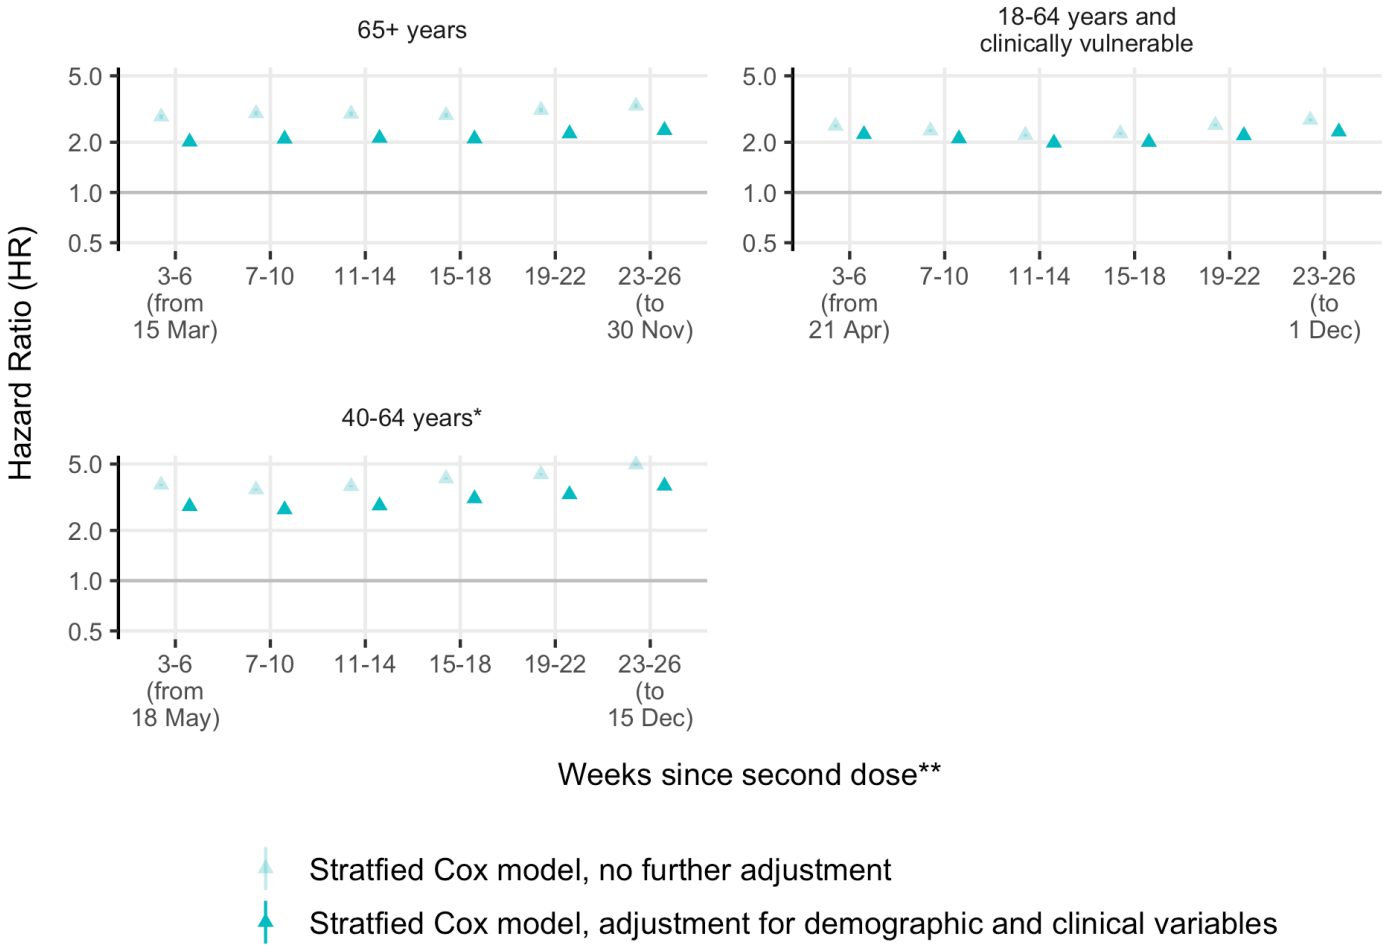

**Supplementary Figure 28:** Unadjusted and adjusted hazard ratios for any SARS-CoV-2 test for ChAdOx1 vs unvaccinated



Any SARS-CoV-2 test

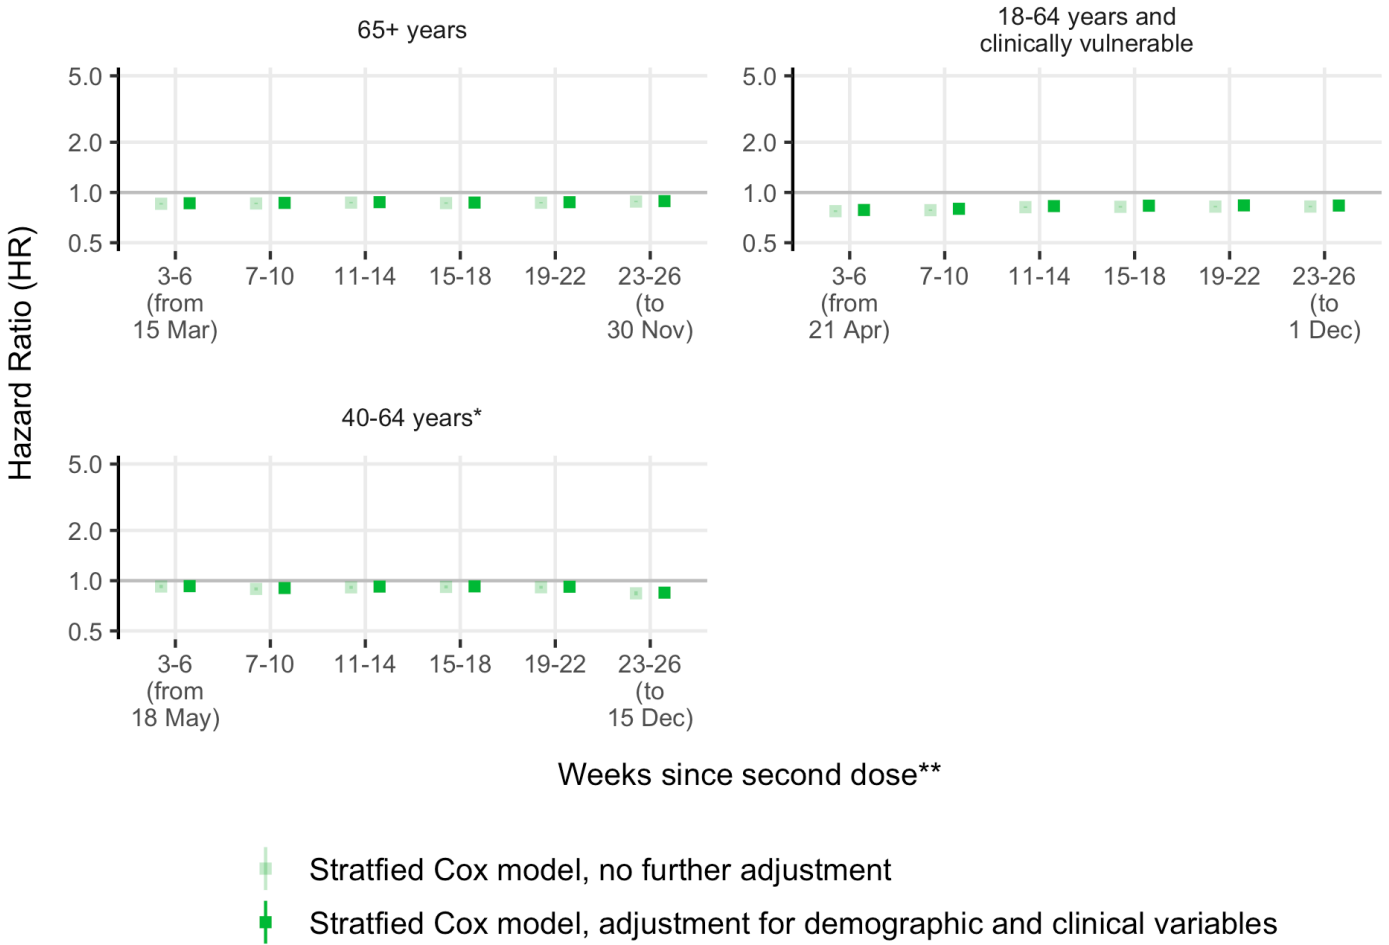

Supplementary Figure 29: Unadjusted and adjusted hazard ratios for any SARS-CoV-2 test for BNT162b2 vs ChAdOx1

Any SARS-CoV-2 test

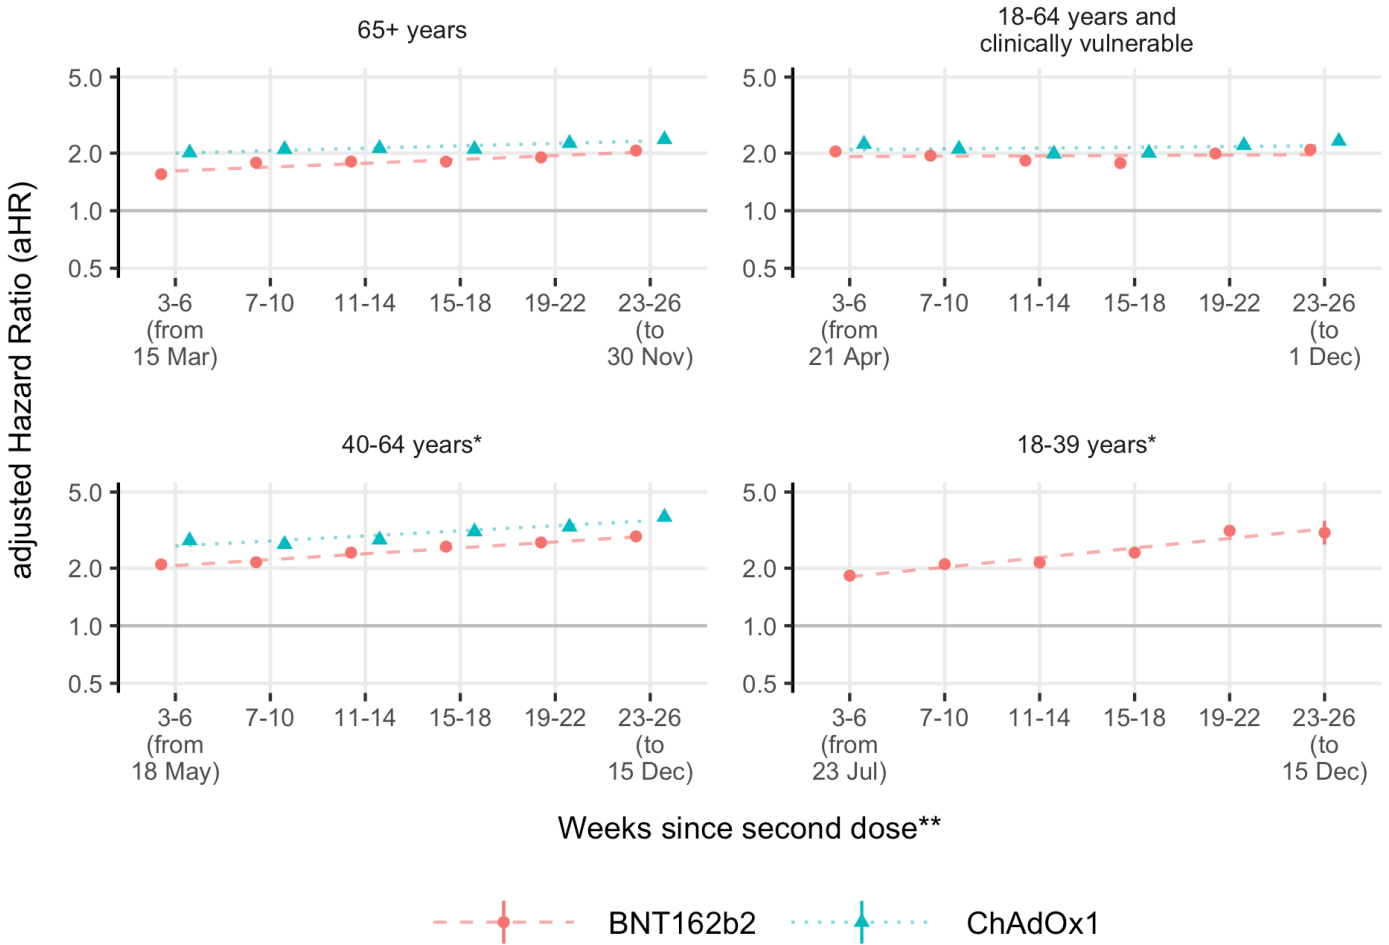

Supplementary Figure 30: Adjusted hazard ratios for any SARS-CoV-2 test for BNT162b2 and ChAdOx1 vs unvaccinated

Any SARS-CoV-2 test

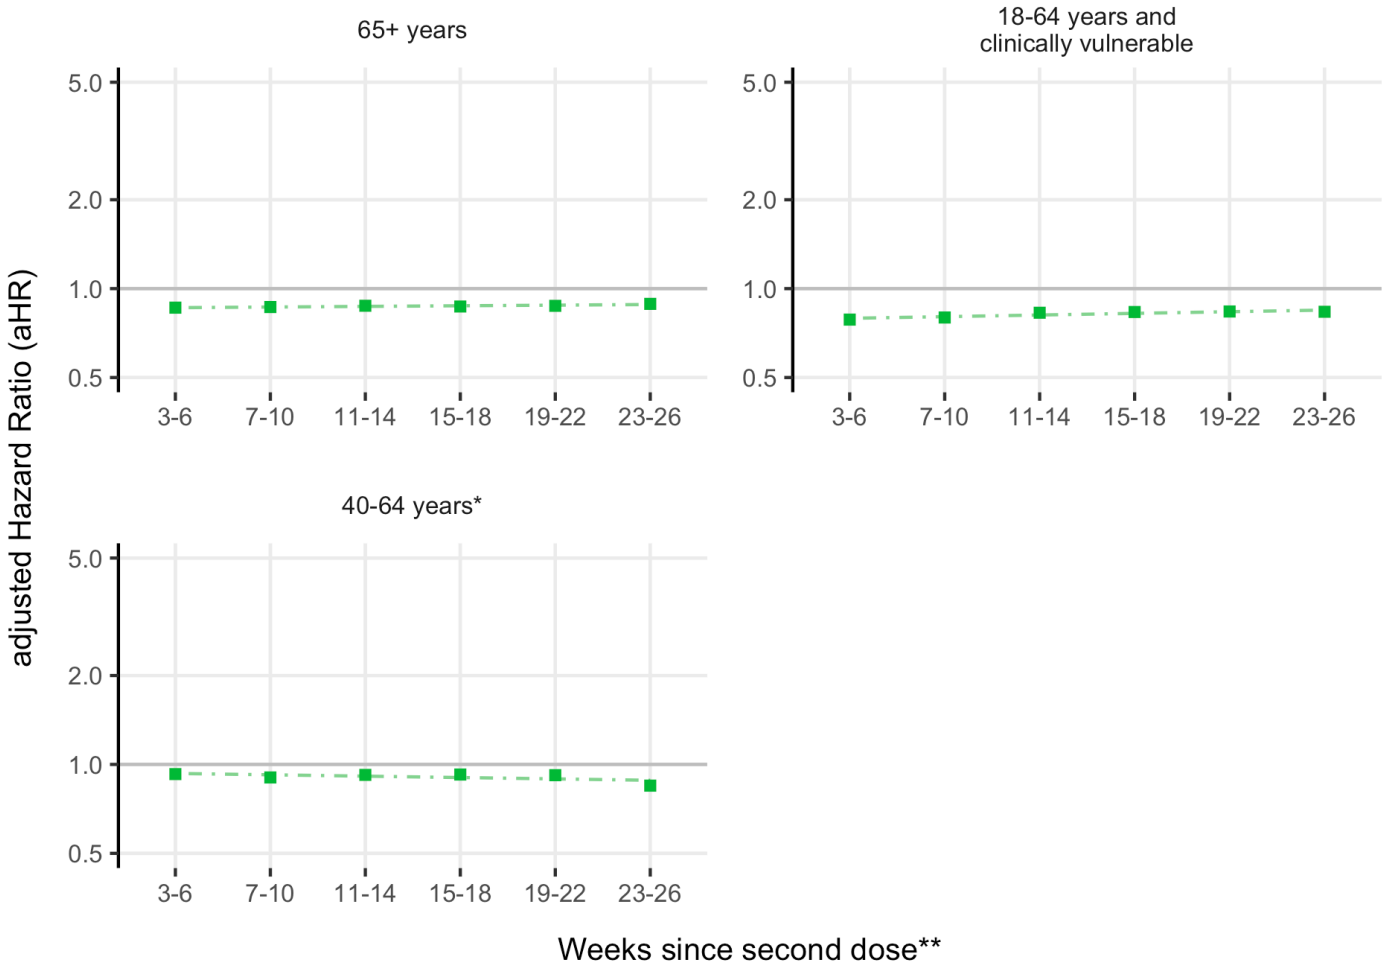

Supplementary Figure 31: Adjusted hazard ratios for any SARS-CoV-2 test for BNT162b2 vs ChAdOx1

**Supplementary Table 9: Covariate hazard ratios for COVID-19 hospitalisation in the BNT162b2 vs unvaccinated comparison and the 65+ years subgroup.**

| Variable                   | Category                            | Weeks since second dose |                      |                     |                  |                  |                  |
|----------------------------|-------------------------------------|-------------------------|----------------------|---------------------|------------------|------------------|------------------|
|                            |                                     | 3-6                     | 7-10                 | 11-14               | 15-18            | 19-22            | 23-26            |
| Age*                       | 65-70                               | 1.10 (0.87-1.38)        | 1.07 (0.92-1.25)     | 1.02 (0.91-1.14)    | 1.06 (0.95-1.18) | 1.04 (0.93-1.17) | 1.07 (0.96-1.20) |
|                            | 70-75                               | 1.42 (1.02-1.99)        | 1.05 (0.83-1.31)     | 0.96 (0.82-1.11)    | 1.01 (0.90-1.13) | 1.05 (0.95-1.17) | 1.08 (0.97-1.20) |
|                            | 75-80                               | 1.15 (0.82-1.60)        | 1.11 (0.83-1.48)     | 1.09 (0.90-1.32)    | 0.99 (0.89-1.10) | 1.07 (0.96-1.19) | 1.05 (0.95-1.16) |
|                            | 80+                                 | 0.83 (0.14-4.87)        | 26.51 (0.66-1069.12) | 24.33 (0.81-731.05) | 1.64 (0.51-5.31) | 1.14 (0.47-2.76) | 0.93 (0.46-1.91) |
|                            | 80+ squared                         | 1.00 (0.99-1.01)        | 0.98 (0.96-1.00)     | 0.98 (0.96-1.00)    | 1.00 (0.99-1.00) | 1.00 (0.99-1.00) | 1.00 (1.00-1.00) |
| Sex                        | Female                              | 1.00                    | 1.00                 | 1.00                | 1.00             | 1.00             | 1.00             |
|                            | Male                                | 1.62 (1.08-2.42)        | 1.34 (0.96-1.87)     | 1.12 (0.90-1.41)    | 1.42 (1.21-1.68) | 1.45 (1.25-1.68) | 1.54 (1.34-1.76) |
| IMD                        | 1                                   | 1.00                    | 1.00                 | 1.00                | 1.00             | 1.00             | 1.00             |
|                            | 2                                   | 0.84 (0.49-1.46)        | 0.57 (0.35-0.91)     | 1.03 (0.75-1.42)    | 0.82 (0.65-1.03) | 0.77 (0.62-0.96) | 0.88 (0.72-1.06) |
|                            | 3                                   | 0.63 (0.33-1.23)        | 0.87 (0.54-1.38)     | 0.81 (0.57-1.17)    | 0.68 (0.53-0.88) | 0.72 (0.57-0.90) | 0.69 (0.56-0.84) |
|                            | 4 / 5                               | 0.55 (0.32-0.94)        | -                    | -                   | -                | -                | -                |
|                            | 4                                   | -                       | 0.46 (0.26-0.82)     | 0.73 (0.50-1.06)    | 0.69 (0.54-0.89) | 0.65 (0.51-0.82) | 0.62 (0.50-0.77) |
|                            | 5                                   | -                       | 0.54 (0.29-0.98)     | 0.91 (0.63-1.33)    | 0.62 (0.48-0.82) | 0.47 (0.36-0.62) | 0.52 (0.42-0.66) |
| Ethnicity                  | White                               | 1.00                    | 1.00                 | 1.00                | 1.00             | 1.00             | 1.00             |
|                            | Black                               | 0.74 (0.24-2.33)        | 1.61 (0.81-3.21)     | -                   | -                | 1.08 (0.72-1.65) | 0.89 (0.58-1.37) |
|                            | South Asian                         | 2.16 (1.18-3.97)        | -                    | -                   | -                | 1.22 (0.90-1.66) | 0.88 (0.63-1.21) |
|                            | Mixed / Other                       | 1.34 (0.48-3.78)        | -                    | -                   | -                | 0.83 (0.51-1.37) | -                |
|                            | South Asian / Mixed / Other         | -                       | 1.76 (1.13-2.74)     | -                   | -                | -                | -                |
|                            | Black / South Asian / Mixed / Other | -                       | -                    | 1.10 (0.78-1.53)    | 1.16 (0.91-1.48) | -                | -                |
|                            | Mixed                               | -                       | -                    | -                   | -                | -                | 0.38 (0.12-1.20) |
|                            | Other                               | -                       | -                    | -                   | -                | -                | 1.07 (0.62-1.84) |
| BMI                        | <30 or missing                      | 1.00                    | 1.00                 | 1.00                | 1.00             | 1.00             | 1.00             |
|                            | 40+ / 30-34.9 / 35-39.9             | 1.38 (0.88-2.15)        | 1.40 (0.97-2.02)     | -                   | -                | -                | -                |
|                            | 40+                                 | -                       | -                    | 1.96 (1.20-3.21)    | 1.27 (0.79-2.03) | 2.16 (1.54-3.03) | 2.90 (2.19-3.85) |
|                            | 30-34.9                             | -                       | -                    | 1.33 (0.99-1.78)    | 1.32 (1.07-1.63) | 1.34 (1.11-1.62) | 1.28 (1.08-1.52) |
|                            | 35-39.9                             | -                       | -                    | 1.81 (1.24-2.65)    | 1.74 (1.30-2.32) | 1.25 (0.92-1.70) | 1.39 (1.06-1.81) |
| Serious mental illness     | -                                   | -                       | -                    | 1.03 (0.57-1.89)    | 1.10 (0.63-1.91) | 1.80 (1.18-2.75) |                  |
| Morbidity count            | 0                                   | 1.00                    | 1.00                 | 1.00                | 1.00             | 1.00             | 1.00             |
|                            | 1                                   | 1.39 (0.81-2.36)        | 1.47 (0.95-2.28)     | 1.82 (1.34-2.46)    | 1.63 (1.31-2.02) | 1.76 (1.42-2.18) | 1.70 (1.41-2.05) |
|                            | 2+                                  | 2.15 (1.27-3.65)        | 3.15 (2.10-4.74)     | 3.54 (2.59-4.82)    | 2.59 (2.08-3.23) | 3.46 (2.80-4.26) | 2.92 (2.43-3.51) |
| Flu vaccine                | -                                   | 0.96 (0.66-1.41)        | 1.07 (0.82-1.40)     | 0.93 (0.75-1.14)    | 0.87 (0.72-1.06) | 1.05 (0.88-1.26) |                  |
| Number of SARS-CoV-2 tests | 0                                   | 1.00                    | 1.00                 | 1.00                | 1.00             | 1.00             | 1.00             |
|                            | 1                                   | 1.84 (1.00-3.37)        | 1.68 (0.99-2.85)     | 1.17 (0.80-1.72)    | 1.42 (1.10-1.84) | 1.65 (1.32-2.05) | 1.02 (0.81-1.28) |
|                            | 2 / 3+                              | 2.37 (1.27-4.42)        | 2.22 (1.25-3.92)     | -                   | -                | -                | -                |
|                            | 2                                   | -                       | -                    | 1.33 (0.71-2.50)    | 1.69 (1.12-2.53) | 2.12 (1.52-2.94) | 1.64 (1.20-2.24) |
|                            | 3+                                  | -                       | -                    | 3.00 (1.93-4.68)    | 2.75 (1.99-3.80) | 2.27 (1.65-3.13) | 1.38 (0.97-1.95) |

\* Estimates correspond to a 1-year increase in age (or age-squared as indicated) within the given age categories.

**Supplementary Table 10:** Covariate hazard ratios for COVID-19 death in the BNT162b2 vs unvaccinated comparison and the 65+ years subgroup.

| Variable                   | Category                            | Weeks since second dose |      |                  |                   |                  |                  |
|----------------------------|-------------------------------------|-------------------------|------|------------------|-------------------|------------------|------------------|
|                            |                                     | 3-6                     | 7-10 | 11-14            | 15-18             | 19-22            | 23-26            |
| Age*                       | 65-70                               | 1.63 (0.64-4.14)        | -    | -                | 1.10 (0.87-1.38)  | 1.03 (0.80-1.31) | 1.03 (0.81-1.32) |
|                            | 70-75                               | 4.95 (4.22-5.82)        | -    | -                | 0.94 (0.73-1.22)  | 1.09 (0.88-1.33) | 1.14 (0.89-1.45) |
|                            | 75-80                               | 1.06 (0.27-4.22)        | -    | -                | 1.09 (0.82-1.44)  | 1.17 (0.96-1.42) | 1.13 (0.87-1.47) |
|                            | 80+                                 | 0.66 (0.08-5.72)        | -    | -                | 2.38 (0.20-27.84) | 1.16 (0.30-4.48) | 0.26 (0.10-0.65) |
|                            | 80+ squared                         | 1.00 (0.99-1.01)        | -    | -                | 1.00 (0.98-1.01)  | 1.00 (0.99-1.01) | 1.01 (1.00-1.01) |
| Sex                        | Female                              | -                       | -    | -                | 1.00              | 1.00             | 1.00             |
|                            | Male                                | -                       | -    | -                | 1.85 (1.24-2.77)  | 2.07 (1.54-2.78) | 2.14 (1.59-2.86) |
| IMD                        | 1                                   | 1.00                    | -    | -                | 1.00              | 1.00             | 1.00             |
|                            | 2 / 3 / 4 / 5                       | 1.02 (0.39-2.68)        | -    | -                | -                 | -                | -                |
|                            | 2                                   | -                       | -    | -                | 0.74 (0.43-1.27)  | 0.69 (0.46-1.04) | 0.84 (0.55-1.29) |
|                            | 3                                   | -                       | -    | -                | 0.51 (0.27-0.97)  | 0.59 (0.38-0.91) | 0.93 (0.61-1.42) |
|                            | 4                                   | -                       | -    | -                | 0.63 (0.35-1.16)  | 0.48 (0.30-0.78) | 0.68 (0.43-1.08) |
| Ethnicity                  | 5                                   | -                       | -    | -                | 0.75 (0.41-1.37)  | 0.36 (0.21-0.62) | 0.60 (0.37-0.98) |
|                            | White                               | 1.00                    | -    | -                | 1.00              | 1.00             | 1.00             |
|                            | Black                               | 0.00 (0.00-0.00)        | -    | -                | -                 | -                | -                |
|                            | South Asian / Mixed / Other         | 3.18 (1.26-8.07)        | -    | -                | -                 | -                | -                |
| BMI                        | Black / South Asian / Mixed / Other | -                       | -    | -                | 1.01 (0.55-1.83)  | 1.31 (0.86-2.00) | 1.55 (0.99-2.43) |
|                            | <30 or missing                      | 1.00                    | -    | -                | 1.00              | 1.00             | 1.00             |
|                            | 40+ / 30-34.9 / 35-39.9             | 0.32 (0.08-1.38)        | -    | -                | 2.59 (1.68-4.01)  | -                | -                |
|                            | 40+                                 | -                       | -    | -                | -                 | 2.93 (1.55-5.55) | 3.76 (2.10-6.73) |
|                            | 30-34.9                             | -                       | -    | -                | -                 | 1.67 (1.16-2.38) | 1.67 (1.18-2.36) |
|                            | 35-39.9                             | -                       | -    | -                | -                 | 1.86 (1.07-3.24) | 0.80 (0.38-1.72) |
| Morbidity count            | 0                                   | 1.00                    | -    | -                | 1.00              | 1.00             | 1.00             |
|                            | 1                                   | 2.73 (0.76-9.76)        | -    | -                | 2.01 (1.19-3.38)  | 1.69 (1.11-2.57) | 2.04 (1.33-3.13) |
|                            | 2+                                  | 4.97 (1.49-16.62)       | -    | -                | 2.80 (1.62-4.85)  | 2.92 (1.94-4.38) | 3.69 (2.44-5.60) |
| Flu vaccine                | -                                   | -                       | -    | 1.08 (0.66-1.75) | 1.18 (0.81-1.72)  | 1.29 (0.88-1.89) |                  |
| Number of SARS-CoV-2 tests | 0                                   | 1.00                    | -    | -                | 1.00              | 1.00             | 1.00             |
|                            | 1 / 2 / 3+                          | 2.18 (0.91-5.22)        | -    | -                | -                 | -                | -                |
|                            | 1                                   | -                       | -    | -                | 1.94 (1.08-3.49)  | 1.70 (1.12-2.58) | 1.23 (0.76-1.97) |
|                            | 2 / 3+                              | -                       | -    | -                | 2.16 (1.11-4.21)  | -                | -                |
|                            | 2                                   | -                       | -    | -                | -                 | 2.14 (1.11-4.10) | 1.78 (0.94-3.39) |
| 3+                         | -                                   | -                       | -    | -                | 2.00 (1.05-3.81)  | 1.41 (0.69-2.88) |                  |

\* Estimates correspond to a 1-year increase in age (or age-squared as indicated) within the given age categories.

**Supplementary Table 11: Covariate hazard ratios for Positive SARS-CoV-2 test in the BNT162b2 vs unvaccinated comparison and the 65+ years subgroup.**

| Variable                   | Category                            | Weeks since second dose |                   |                   |                  |                  |                  |
|----------------------------|-------------------------------------|-------------------------|-------------------|-------------------|------------------|------------------|------------------|
|                            |                                     | 3-6                     | 7-10              | 11-14             | 15-18            | 19-22            | 23-26            |
| Age*                       | 65-70                               | 0.95 (0.82-1.11)        | 0.93 (0.86-1.01)  | 0.97 (0.91-1.03)  | 0.97 (0.93-1.02) | 0.97 (0.92-1.02) | 0.97 (0.93-1.01) |
|                            | 70-75                               | 1.08 (0.89-1.33)        | 0.94 (0.83-1.06)  | 0.95 (0.90-1.01)  | 0.96 (0.92-1.00) | 0.97 (0.93-1.01) | 0.97 (0.94-1.01) |
|                            | 75-80                               | 0.92 (0.72-1.18)        | 1.22 (1.03-1.46)  | 0.97 (0.88-1.05)  | 1.01 (0.96-1.07) | 0.96 (0.92-1.01) | 0.98 (0.94-1.03) |
|                            | 80+                                 | 0.88 (0.15-5.16)        | 3.22 (0.20-52.39) | 3.18 (0.26-38.34) | 0.85 (0.33-2.22) | 0.66 (0.39-1.11) | 0.81 (0.49-1.34) |
|                            | 80+ squared                         | 1.00 (0.99-1.01)        | 0.99 (0.98-1.01)  | 0.99 (0.98-1.01)  | 1.00 (1.00-1.01) | 1.00 (1.00-1.01) | 1.00 (1.00-1.00) |
| Sex                        | Female                              | 1.00                    | 1.00              | 1.00              | 1.00             | 1.00             | 1.00             |
|                            | Male                                | 1.26 (0.97-1.64)        | 1.23 (1.04-1.46)  | 1.08 (0.97-1.19)  | 1.21 (1.12-1.30) | 1.11 (1.04-1.19) | 1.20 (1.13-1.27) |
| IMD                        | 1                                   | 1.00                    | 1.00              | 1.00              | 1.00             | 1.00             | 1.00             |
|                            | 2                                   | 1.01 (0.69-1.48)        | 0.95 (0.73-1.23)  | 0.95 (0.80-1.12)  | 0.94 (0.84-1.06) | 0.94 (0.84-1.05) | 1.00 (0.90-1.10) |
|                            | 3                                   | 0.72 (0.46-1.13)        | 1.00 (0.77-1.31)  | 0.87 (0.74-1.03)  | 0.82 (0.73-0.93) | 0.89 (0.80-0.99) | 0.92 (0.84-1.02) |
|                            | 4                                   | 0.84 (0.54-1.28)        | 0.95 (0.74-1.24)  | 0.91 (0.77-1.08)  | 0.83 (0.74-0.94) | 0.85 (0.76-0.94) | 0.93 (0.84-1.02) |
|                            | 5                                   | 0.90 (0.60-1.36)        | 0.90 (0.68-1.20)  | 0.99 (0.84-1.17)  | 0.87 (0.77-0.98) | 0.76 (0.68-0.86) | 0.87 (0.79-0.96) |
| Ethnicity                  | White                               | 1.00                    | 1.00              | 1.00              | 1.00             | 1.00             | 1.00             |
|                            | Black / South Asian / Mixed / Other | 2.34 (1.63-3.36)        | 1.36 (1.05-1.75)  | -                 | -                | -                | -                |
|                            | Black                               | -                       | -                 | 0.86 (0.57-1.30)  | 1.33 (1.01-1.74) | 1.22 (0.94-1.59) | 0.87 (0.65-1.16) |
|                            | South Asian / Mixed / Other         | -                       | -                 | 1.08 (0.88-1.33)  | -                | -                | -                |
|                            | South Asian                         | -                       | -                 | -                 | 1.25 (1.04-1.50) | 1.24 (1.05-1.47) | 0.83 (0.69-1.00) |
|                            | Mixed                               | -                       | -                 | -                 | 1.13 (0.72-1.78) | 0.60 (0.34-1.07) | 0.78 (0.49-1.24) |
| BMI                        | <30 or missing                      | 1.00                    | 1.00              | 1.00              | 1.00             | 1.00             | 1.00             |
|                            | 40+                                 | 1.28 (0.59-2.78)        | 1.01 (0.61-1.67)  | 1.46 (1.14-1.89)  | 1.19 (0.96-1.47) | 1.54 (1.29-1.83) | 1.40 (1.20-1.64) |
|                            | 30-34.9                             | 1.05 (0.72-1.51)        | 1.47 (1.19-1.81)  | 1.22 (1.07-1.40)  | 1.29 (1.17-1.42) | 1.28 (1.17-1.39) | 1.18 (1.09-1.27) |
|                            | 35-39.9                             | 1.17 (0.67-2.03)        | 1.31 (0.95-1.81)  | 1.49 (1.24-1.79)  | 1.18 (1.02-1.37) | 1.10 (0.96-1.27) | 1.19 (1.06-1.34) |
| Learning disability        | -                                   | -                       | -                 | 1.57 (0.78-3.15)  | -                | -                |                  |
| Serious mental illness     | -                                   | -                       | -                 | 0.86 (0.61-1.22)  | 0.76 (0.54-1.08) | 0.81 (0.60-1.09) |                  |
| Morbidity count            | 0                                   | 1.00                    | 1.00              | 1.00              | 1.00             | 1.00             | 1.00             |
|                            | 1                                   | 1.03 (0.75-1.42)        | 1.04 (0.85-1.29)  | 1.33 (1.18-1.51)  | 1.17 (1.07-1.28) | 1.12 (1.04-1.22) | 1.05 (0.98-1.13) |
|                            | 2+                                  | 1.12 (0.79-1.59)        | 1.51 (1.21-1.89)  | 1.58 (1.37-1.82)  | 1.35 (1.22-1.49) | 1.29 (1.18-1.41) | 1.18 (1.09-1.27) |
| Flu vaccine                |                                     | 1.47 (1.05-2.06)        | 1.22 (0.97-1.54)  | 1.26 (1.08-1.46)  | 1.25 (1.11-1.40) | 1.23 (1.11-1.37) | 1.37 (1.24-1.51) |
| Number of SARS-CoV-2 tests | 0                                   | 1.00                    | 1.00              | 1.00              | 1.00             | 1.00             | 1.00             |
|                            | 1                                   | 2.77 (1.96-3.92)        | 1.72 (1.33-2.21)  | 1.62 (1.40-1.88)  | 1.42 (1.27-1.59) | 1.55 (1.41-1.71) | 1.17 (1.07-1.29) |
|                            | 2                                   | 2.40 (1.28-4.47)        | 1.67 (1.06-2.65)  | 1.35 (1.01-1.81)  | 1.57 (1.30-1.91) | 1.38 (1.15-1.65) | 1.21 (1.02-1.42) |
|                            | 3+                                  | 3.23 (1.85-5.64)        | 1.83 (1.14-2.94)  | 1.97 (1.50-2.58)  | 1.58 (1.29-1.95) | 1.43 (1.18-1.74) | 1.41 (1.19-1.67) |

\* Estimates correspond to a 1-year increase in age (or age-squared as indicated) within the given age categories.

**Supplementary Table 12: Covariate hazard ratios for Non-COVID-19 death in the BNT162b2 vs unvaccinated comparison and the 65+ years subgroup.**

| Variable                   | Category         | Weeks since second dose |                  |                  |                  |                  |                  |
|----------------------------|------------------|-------------------------|------------------|------------------|------------------|------------------|------------------|
|                            |                  | 3-6                     | 7-10             | 11-14            | 15-18            | 19-22            | 23-26            |
| Age*                       | 65-70            | 0.97 (0.86-1.09)        | 1.14 (1.00-1.30) | 1.10 (0.97-1.26) | 1.05 (0.93-1.19) | 1.19 (1.05-1.34) | 1.11 (0.99-1.23) |
|                            | 70-75            | 1.13 (1.01-1.25)        | 1.08 (0.98-1.17) | 1.11 (1.02-1.22) | 1.09 (1.00-1.18) | 1.02 (0.94-1.10) | 1.05 (0.97-1.14) |
|                            | 75-80            | 1.06 (0.97-1.16)        | 1.08 (0.99-1.18) | 1.06 (0.98-1.14) | 1.09 (1.01-1.18) | 1.12 (1.05-1.21) | 1.05 (0.98-1.13) |
|                            | 80+              | 1.13 (0.72-1.77)        | 1.13 (0.71-1.80) | 0.87 (0.60-1.26) | 1.04 (0.68-1.59) | 1.17 (0.76-1.82) | 1.33 (0.89-2.00) |
|                            | 80+ squared      | 1.00 (1.00-1.00)        | 1.00 (1.00-1.00) | 1.00 (1.00-1.00) | 1.00 (1.00-1.00) | 1.00 (1.00-1.00) | 1.00 (1.00-1.00) |
| Sex                        | Female           | 1.00                    | 1.00             | 1.00             | 1.00             | 1.00             | 1.00             |
|                            | Male             | 1.62 (1.44-1.82)        | 1.47 (1.32-1.64) | 1.42 (1.28-1.57) | 1.35 (1.23-1.50) | 1.27 (1.15-1.40) | 1.37 (1.25-1.50) |
| IMD                        | 1                | 1.00                    | 1.00             | 1.00             | 1.00             | 1.00             | 1.00             |
|                            | 2                | 0.82 (0.68-0.99)        | 0.89 (0.75-1.06) | 0.81 (0.68-0.96) | 1.05 (0.89-1.24) | 0.72 (0.61-0.84) | 0.86 (0.73-1.00) |
|                            | 3                | 0.70 (0.58-0.85)        | 0.71 (0.60-0.85) | 0.72 (0.61-0.85) | 0.81 (0.69-0.96) | 0.69 (0.59-0.80) | 0.74 (0.63-0.86) |
|                            | 4                | 0.69 (0.57-0.83)        | 0.75 (0.63-0.89) | 0.73 (0.62-0.86) | 0.87 (0.74-1.03) | 0.61 (0.52-0.72) | 0.72 (0.62-0.84) |
|                            | 5                | 0.67 (0.56-0.81)        | 0.67 (0.56-0.80) | 0.67 (0.57-0.79) | 0.82 (0.69-0.97) | 0.58 (0.50-0.68) | 0.64 (0.54-0.74) |
| Ethnicity                  | White            | 1.00                    | 1.00             | 1.00             | 1.00             | 1.00             | 1.00             |
|                            | Black            | 0.59 (0.36-0.97)        | 0.47 (0.26-0.85) | 0.55 (0.31-0.96) | 0.61 (0.37-1.00) | 0.78 (0.49-1.22) | 0.70 (0.43-1.13) |
|                            | South Asian      | 0.53 (0.37-0.77)        | 0.41 (0.27-0.63) | 0.45 (0.30-0.68) | 0.50 (0.35-0.71) | 0.43 (0.29-0.64) | 0.41 (0.28-0.62) |
|                            | Mixed / Other    | 0.61 (0.36-1.06)        | -                | 0.62 (0.36-1.06) | 0.58 (0.35-0.98) | 0.65 (0.39-1.08) | -                |
|                            | Mixed            | -                       | 0.00 (0.00-0.00) | -                | -                | -                | 0.67 (0.30-1.51) |
|                            | Other            | -                       | 0.93 (0.53-1.63) | -                | -                | -                | 0.47 (0.22-0.99) |
| BMI                        | <30 or missing   | 1.00                    | 1.00             | 1.00             | 1.00             | 1.00             | 1.00             |
|                            | 40+              | 1.03 (0.70-1.51)        | 1.08 (0.75-1.55) | 1.04 (0.73-1.48) | 1.16 (0.83-1.61) | 0.90 (0.63-1.28) | 1.13 (0.83-1.54) |
|                            | 30-34.9          | 0.72 (0.61-0.86)        | 0.72 (0.61-0.85) | 0.99 (0.86-1.14) | 0.90 (0.78-1.04) | 0.84 (0.73-0.97) | 0.80 (0.70-0.92) |
|                            | 35-39.9          | 0.90 (0.69-1.18)        | 0.88 (0.68-1.13) | 0.80 (0.62-1.04) | 0.92 (0.72-1.16) | 0.74 (0.58-0.95) | 0.78 (0.62-0.99) |
| Serious mental illness     | 1.75 (1.17-2.62) | 1.77 (1.18-2.65)        | 1.86 (1.28-2.72) | 1.39 (0.91-2.11) | 2.03 (1.43-2.87) | 1.32 (0.87-2.01) |                  |
| Morbidity count            | 0                | 1.00                    | 1.00             | 1.00             | 1.00             | 1.00             | 1.00             |
|                            | 1                | 2.14 (1.80-2.55)        | 1.69 (1.44-1.99) | 1.67 (1.44-1.95) | 1.71 (1.48-1.98) | 1.70 (1.47-1.97) | 1.48 (1.29-1.70) |
|                            | 2+               | 3.70 (3.10-4.40)        | 2.83 (2.42-3.31) | 2.81 (2.42-3.27) | 2.80 (2.42-3.23) | 3.03 (2.62-3.50) | 2.64 (2.31-3.02) |
| Flu vaccine                | 1.05 (0.87-1.27) | 0.93 (0.78-1.11)        | 0.90 (0.76-1.07) | 0.84 (0.72-0.99) | 0.89 (0.75-1.05) | 0.93 (0.80-1.10) |                  |
| Number of SARS-CoV-2 tests | 0                | 1.00                    | 1.00             | 1.00             | 1.00             | 1.00             | 1.00             |
|                            | 1                | 1.22 (1.02-1.48)        | 1.61 (1.37-1.89) | 1.37 (1.17-1.60) | 1.30 (1.11-1.52) | 1.27 (1.08-1.49) | 1.30 (1.12-1.50) |
|                            | 2                | 1.38 (1.03-1.84)        | 1.92 (1.52-2.43) | 2.01 (1.62-2.50) | 1.91 (1.54-2.38) | 2.21 (1.81-2.71) | 1.84 (1.50-2.26) |
|                            | 3+               | 3.38 (2.79-4.09)        | 3.31 (2.75-4.00) | 3.27 (2.74-3.91) | 3.43 (2.89-4.08) | 3.57 (3.02-4.23) | 3.34 (2.84-3.93) |

\* Estimates correspond to a 1-year increase in age (or age-squared as indicated) within the given age categories.

**Supplementary Table 13: Covariate hazard ratios for Any SARS-CoV-2 test in the BNT162b2 vs unvaccinated comparison and the 65+ years subgroup.**

| Variable                   | Category       | Weeks since second dose |                  |                  |                  |                  |                  |
|----------------------------|----------------|-------------------------|------------------|------------------|------------------|------------------|------------------|
|                            |                | 3-6                     | 7-10             | 11-14            | 15-18            | 19-22            | 23-26            |
| Age*                       | 65-70          | 0.95 (0.94-0.96)        | 0.95 (0.94-0.96) | 0.95 (0.94-0.96) | 0.95 (0.94-0.96) | 0.95 (0.94-0.96) | 0.96 (0.95-0.97) |
|                            | 70-75          | 0.96 (0.95-0.97)        | 0.95 (0.94-0.96) | 0.96 (0.95-0.96) | 0.95 (0.94-0.96) | 0.95 (0.95-0.96) | 0.95 (0.95-0.96) |
|                            | 75-80          | 0.97 (0.95-0.98)        | 0.97 (0.96-0.98) | 0.96 (0.95-0.97) | 0.96 (0.95-0.97) | 0.96 (0.95-0.97) | 0.96 (0.95-0.97) |
|                            | 80+            | 0.68 (0.61-0.77)        | 0.66 (0.59-0.74) | 0.63 (0.56-0.70) | 0.60 (0.53-0.66) | 0.62 (0.56-0.69) | 0.60 (0.54-0.66) |
|                            | 80+ squared    | 1.00 (1.00-1.00)        | 1.00 (1.00-1.00) | 1.00 (1.00-1.00) | 1.00 (1.00-1.00) | 1.00 (1.00-1.00) | 1.00 (1.00-1.00) |
| Sex                        | Female         | 1.00                    | 1.00             | 1.00             | 1.00             | 1.00             | 1.00             |
|                            | Male           | 1.02 (1.01-1.04)        | 1.02 (1.00-1.03) | 1.03 (1.02-1.05) | 1.03 (1.01-1.04) | 1.03 (1.01-1.04) | 1.04 (1.02-1.05) |
| IMD                        | 1              | 1.00                    | 1.00             | 1.00             | 1.00             | 1.00             | 1.00             |
|                            | 2              | 1.08 (1.05-1.11)        | 1.10 (1.07-1.13) | 1.12 (1.09-1.15) | 1.12 (1.09-1.15) | 1.10 (1.07-1.13) | 1.12 (1.09-1.15) |
|                            | 3              | 1.13 (1.10-1.17)        | 1.18 (1.14-1.21) | 1.18 (1.15-1.21) | 1.18 (1.15-1.21) | 1.18 (1.16-1.21) | 1.22 (1.19-1.25) |
|                            | 4              | 1.17 (1.14-1.20)        | 1.23 (1.20-1.26) | 1.23 (1.20-1.26) | 1.25 (1.22-1.28) | 1.27 (1.24-1.30) | 1.30 (1.27-1.33) |
|                            | 5              | 1.24 (1.20-1.27)        | 1.30 (1.27-1.34) | 1.32 (1.29-1.35) | 1.33 (1.30-1.36) | 1.35 (1.32-1.38) | 1.39 (1.35-1.42) |
| Ethnicity                  | White          | 1.00                    | 1.00             | 1.00             | 1.00             | 1.00             | 1.00             |
|                            | Black          | 0.83 (0.76-0.90)        | 0.84 (0.77-0.91) | 0.81 (0.75-0.88) | 0.86 (0.79-0.93) | 0.83 (0.77-0.90) | 0.83 (0.77-0.90) |
|                            | South Asian    | 0.58 (0.54-0.61)        | 0.61 (0.58-0.64) | 0.57 (0.54-0.60) | 0.60 (0.57-0.63) | 0.62 (0.58-0.65) | 0.65 (0.62-0.69) |
|                            | Mixed          | 0.74 (0.65-0.83)        | 0.75 (0.66-0.84) | 0.76 (0.68-0.85) | 0.77 (0.68-0.86) | 0.84 (0.75-0.94) | 0.81 (0.73-0.91) |
|                            | Other          | 0.62 (0.57-0.69)        | 0.67 (0.61-0.73) | 0.62 (0.56-0.68) | 0.66 (0.61-0.72) | 0.67 (0.62-0.73) | 0.67 (0.61-0.73) |
| BMI                        | <30 or missing | 1.00                    | 1.00             | 1.00             | 1.00             | 1.00             | 1.00             |
|                            | 40+            | 0.87 (0.83-0.92)        | 0.85 (0.81-0.89) | 0.86 (0.82-0.90) | 0.83 (0.80-0.88) | 0.83 (0.79-0.86) | 0.82 (0.78-0.86) |
|                            | 30-34.9        | 0.96 (0.94-0.98)        | 0.96 (0.94-0.98) | 0.95 (0.93-0.97) | 0.95 (0.93-0.96) | 0.94 (0.92-0.96) | 0.94 (0.93-0.96) |
|                            | 35-39.9        | 0.93 (0.90-0.96)        | 0.95 (0.92-0.98) | 0.92 (0.90-0.95) | 0.92 (0.89-0.95) | 0.88 (0.86-0.91) | 0.87 (0.85-0.90) |
| Learning disability        |                | 1.34 (1.12-1.61)        | 1.36 (1.15-1.62) | 1.20 (1.01-1.44) | 1.50 (1.27-1.77) | 1.36 (1.15-1.60) | 1.23 (1.04-1.46) |
| Serious mental illness     |                | 0.98 (0.91-1.05)        | 1.01 (0.94-1.08) | 1.02 (0.95-1.09) | 1.01 (0.94-1.08) | 1.03 (0.96-1.10) | 0.98 (0.92-1.05) |
| Morbidity count            | 0              | 1.00                    | 1.00             | 1.00             | 1.00             | 1.00             | 1.00             |
|                            | 1              | 1.02 (1.00-1.04)        | 1.02 (1.00-1.03) | 1.01 (0.99-1.02) | 1.03 (1.01-1.04) | 1.01 (0.99-1.02) | 0.99 (0.97-1.00) |
|                            | 2+             | 1.15 (1.13-1.18)        | 1.13 (1.11-1.16) | 1.10 (1.08-1.12) | 1.12 (1.10-1.14) | 1.09 (1.07-1.11) | 1.06 (1.04-1.08) |
| Flu vaccine                |                | 1.55 (1.50-1.59)        | 1.50 (1.46-1.55) | 1.48 (1.45-1.52) | 1.45 (1.41-1.49) | 1.46 (1.43-1.50) | 1.46 (1.42-1.49) |
| Number of SARS-CoV-2 tests | 0              | 1.00                    | 1.00             | 1.00             | 1.00             | 1.00             | 1.00             |
|                            | 1              | 1.67 (1.64-1.71)        | 1.57 (1.54-1.61) | 1.52 (1.49-1.55) | 1.48 (1.45-1.51) | 1.45 (1.42-1.48) | 1.43 (1.40-1.46) |
|                            | 2              | 1.96 (1.90-2.03)        | 1.79 (1.73-1.85) | 1.70 (1.65-1.76) | 1.73 (1.67-1.79) | 1.63 (1.57-1.68) | 1.55 (1.50-1.60) |
|                            | 3+             | 3.49 (3.39-3.61)        | 3.12 (3.02-3.21) | 2.84 (2.75-2.93) | 2.71 (2.63-2.80) | 2.54 (2.46-2.62) | 2.38 (2.30-2.45) |

\* Estimates correspond to a 1-year increase in age (or age-squared as indicated) within the given age categories.



**Supplementary Table 14: Covariate hazard ratios for COVID-19 hospitalisation in the ChAdOx1 vs unvaccinated comparison and the 65+ years subgroup.**

| Variable                   | Category                            | Weeks since second dose |                      |                       |                   |                  |                  |
|----------------------------|-------------------------------------|-------------------------|----------------------|-----------------------|-------------------|------------------|------------------|
|                            |                                     | 3-6                     | 7-10                 | 11-14                 | 15-18             | 19-22            | 23-26            |
| Age*                       | 65-70                               | 1.04 (0.83-1.30)        | 1.06 (0.93-1.21)     | 1.06 (0.96-1.16)      | 1.03 (0.94-1.13)  | 1.06 (0.97-1.16) | 0.98 (0.90-1.06) |
|                            | 70-75                               | 1.29 (1.03-1.61)        | 1.09 (0.92-1.30)     | 1.07 (0.96-1.19)      | 1.03 (0.96-1.11)  | 1.02 (0.96-1.09) | 1.04 (0.97-1.11) |
|                            | 75-80                               | 1.06 (0.78-1.45)        | 1.09 (0.85-1.39)     | 1.00 (0.89-1.12)      | 1.02 (0.94-1.12)  | 1.08 (1.00-1.16) | 1.03 (0.96-1.12) |
|                            | 80+                                 | 0.83 (0.11-6.05)        | 30.61 (0.59-1585.22) | 88.94 (0.31-25706.52) | 3.05 (0.44-21.23) | 0.70 (0.23-2.11) | 1.29 (0.32-5.20) |
|                            | 80+ squared                         | 1.00 (0.99-1.01)        | 0.98 (0.96-1.00)     | 0.97 (0.94-1.01)      | 0.99 (0.98-1.00)  | 1.00 (1.00-1.01) | 1.00 (0.99-1.01) |
| Sex                        | Female                              | 1.00                    | 1.00                 | 1.00                  | 1.00              | 1.00             | 1.00             |
|                            | Male                                | 1.69 (1.16-2.47)        | 1.49 (1.12-1.98)     | 1.29 (1.09-1.54)      | 1.37 (1.20-1.57)  | 1.30 (1.15-1.47) | 1.41 (1.25-1.59) |
| IMD                        | 1                                   | 1.00                    | 1.00                 | 1.00                  | 1.00              | 1.00             | 1.00             |
|                            | 2                                   | 0.74 (0.44-1.26)        | 0.57 (0.37-0.87)     | 0.80 (0.63-1.02)      | 0.75 (0.62-0.91)  | 0.80 (0.67-0.95) | 0.90 (0.75-1.07) |
|                            | 3                                   | 0.59 (0.32-1.07)        | 0.80 (0.53-1.20)     | 0.61 (0.47-0.81)      | 0.65 (0.53-0.80)  | 0.72 (0.60-0.86) | 0.72 (0.60-0.86) |
|                            | 4                                   | 0.66 (0.38-1.17)        | 0.69 (0.45-1.07)     | 0.57 (0.43-0.76)      | 0.56 (0.45-0.70)  | 0.63 (0.52-0.77) | 0.70 (0.58-0.84) |
|                            | 5                                   | 0.51 (0.27-0.98)        | 0.52 (0.32-0.86)     | 0.55 (0.41-0.75)      | 0.47 (0.37-0.60)  | 0.48 (0.39-0.60) | 0.63 (0.51-0.76) |
| Ethnicity                  | White                               | 1.00                    | 1.00                 | 1.00                  | 1.00              | 1.00             | 1.00             |
|                            | Black                               | 0.72 (0.23-2.28)        | 1.78 (0.92-3.47)     | -                     | 1.47 (1.02-2.12)  | 1.09 (0.73-1.63) | 0.97 (0.63-1.50) |
|                            | South Asian / Mixed / Other         | 2.15 (1.25-3.70)        | 2.07 (1.38-3.11)     | -                     | -                 | 1.03 (0.80-1.32) | -                |
|                            | Black / South Asian / Mixed / Other | -                       | -                    | 1.11 (0.85-1.45)      | -                 | -                | -                |
|                            | South Asian                         | -                       | -                    | -                     | 1.25 (0.93-1.68)  | -                | 1.06 (0.80-1.41) |
|                            | Mixed / Other                       | -                       | -                    | -                     | 1.24 (0.81-1.90)  | -                | -                |
|                            | Mixed                               | -                       | -                    | -                     | -                 | -                | 0.37 (0.12-1.15) |
| BMI                        | <30 or missing                      | 1.00                    | 1.00                 | 1.00                  | 1.00              | 1.00             | 1.00             |
|                            | 40+ / 30-34.9 / 35-39.9             | 1.32 (0.86-2.04)        | -                    | -                     | -                 | -                | -                |
|                            | 40+                                 | -                       | 2.41 (1.31-4.41)     | 2.79 (2.08-3.76)      | 2.20 (1.66-2.91)  | 2.29 (1.77-2.97) | 2.81 (2.24-3.53) |
|                            | 30-34.9                             | -                       | 1.87 (1.34-2.61)     | 1.39 (1.11-1.74)      | 1.42 (1.20-1.68)  | 1.80 (1.56-2.09) | 1.44 (1.24-1.67) |
|                            | 35-39.9                             | -                       | 2.21 (1.41-3.47)     | 1.95 (1.48-2.58)      | 1.80 (1.44-2.25)  | 1.93 (1.58-2.37) | 1.91 (1.57-2.31) |
| Serious mental illness     | -                                   | -                       | 1.84 (1.23-2.76)     | 0.94 (0.55-1.60)      | 1.43 (0.96-2.14)  | 1.48 (1.00-2.18) |                  |
| Morbidity count            | 0                                   | 1.00                    | 1.00                 | 1.00                  | 1.00              | 1.00             | 1.00             |
|                            | 1                                   | 2.04 (1.25-3.34)        | 1.52 (1.05-2.20)     | 1.85 (1.45-2.37)      | 1.89 (1.58-2.26)  | 1.93 (1.63-2.30) | 1.99 (1.69-2.33) |
|                            | 2+                                  | 3.15 (1.85-5.38)        | 3.21 (2.25-4.58)     | 4.06 (3.20-5.15)      | 3.13 (2.60-3.76)  | 3.49 (2.94-4.14) | 3.44 (2.92-4.05) |
| Flu vaccine                |                                     | 0.96 (0.59-1.56)        | 0.97 (0.70-1.35)     | 1.18 (0.95-1.46)      | 0.97 (0.82-1.16)  | 0.99 (0.84-1.16) | 1.12 (0.95-1.31) |
| Number of SARS-CoV-2 tests | 0                                   | 1.00                    | 1.00                 | 1.00                  | 1.00              | 1.00             | 1.00             |
|                            | 1                                   | 2.00 (1.16-3.45)        | 1.31 (0.83-2.07)     | 1.20 (0.90-1.59)      | 1.40 (1.14-1.72)  | 1.40 (1.16-1.68) | 1.30 (1.09-1.56) |
|                            | 2 / 3+                              | 1.76 (0.90-3.44)        | -                    | -                     | -                 | -                | -                |
|                            | 2                                   | -                       | 1.51 (0.71-3.18)     | 1.19 (0.73-1.95)      | 1.59 (1.14-2.21)  | 2.05 (1.57-2.67) | 1.57 (1.19-2.08) |
|                            | 3+                                  | -                       | 3.06 (1.71-5.46)     | 2.03 (1.41-2.91)      | 2.11 (1.56-2.85)  | 2.14 (1.64-2.81) | 1.64 (1.23-2.20) |

\* Estimates correspond to a 1-year increase in age (or age-squared as indicated) within the given age categories.

**Supplementary Table 15:** Covariate hazard ratios for COVID-19 death in the ChAdOx1 vs unvaccinated comparison and the 65+ years subgroup.

| Variable                   | Category                            | Weeks since second dose |                      |       |                   |                  |                  |
|----------------------------|-------------------------------------|-------------------------|----------------------|-------|-------------------|------------------|------------------|
|                            |                                     | 3-6                     | 7-10                 | 11-14 | 15-18             | 19-22            | 23-26            |
| Age*                       | 65-70                               | -                       | 1.00 (0.72-1.39)     | -     | 0.96 (0.79-1.16)  | 1.07 (0.89-1.30) | 1.10 (0.89-1.36) |
|                            | 70-75                               | -                       | 1.68 (1.05-2.69)     | -     | 1.01 (0.82-1.24)  | 1.08 (0.94-1.24) | 1.11 (0.93-1.32) |
|                            | 75-80                               | -                       | 0.62 (0.59-0.65)     | -     | 1.10 (0.89-1.37)  | 1.13 (0.96-1.32) | 1.15 (0.96-1.37) |
|                            | 80+                                 | -                       | 26.29 (0.15-4764.08) | -     | 3.03 (0.18-51.02) | 0.40 (0.11-1.47) | 0.25 (0.06-1.00) |
|                            | 80+ squared                         | -                       | 0.98 (0.95-1.01)     | -     | 0.99 (0.98-1.01)  | 1.01 (1.00-1.01) | 1.01 (1.00-1.02) |
| Sex                        | Female                              | -                       | -                    | -     | 1.00              | 1.00             | 1.00             |
|                            | Male                                | -                       | -                    | -     | 1.69 (1.19-2.40)  | 1.43 (1.09-1.86) | 1.61 (1.22-2.13) |
| IMD                        | 1                                   | -                       | 1.00                 | -     | 1.00              | 1.00             | 1.00             |
|                            | 2 / 3 / 4 / 5                       | -                       | 0.61 (0.28-1.32)     | -     | -                 | -                | -                |
|                            | 2                                   | -                       | -                    | -     | 0.70 (0.45-1.08)  | 0.77 (0.52-1.13) | 0.80 (0.54-1.18) |
|                            | 3                                   | -                       | -                    | -     | 0.42 (0.24-0.71)  | 0.68 (0.46-1.02) | 0.74 (0.49-1.10) |
|                            | 4                                   | -                       | -                    | -     | 0.45 (0.26-0.77)  | 0.54 (0.35-0.85) | 0.62 (0.40-0.96) |
| Ethnicity                  | 5                                   | -                       | -                    | -     | 0.49 (0.28-0.85)  | 0.58 (0.37-0.91) | 0.42 (0.26-0.70) |
|                            | White                               | -                       | 1.00                 | -     | 1.00              | 1.00             | 1.00             |
|                            | Black / South Asian / Mixed / Other | -                       | 2.24 (1.04-4.84)     | -     | -                 | -                | -                |
|                            | Black                               | -                       | -                    | -     | 1.30 (0.59-2.89)  | 1.30 (0.64-2.66) | 1.16 (0.53-2.54) |
|                            | South Asian                         | -                       | -                    | -     | 0.85 (0.39-1.84)  | 1.49 (0.91-2.46) | -                |
| BMI                        | Mixed / Other                       | -                       | -                    | -     | 0.85 (0.27-2.74)  | 1.12 (0.50-2.50) | -                |
|                            | South Asian / Mixed / Other         | -                       | -                    | -     | -                 | -                | 1.17 (0.72-1.89) |
|                            | <30 or missing                      | -                       | 1.00                 | -     | 1.00              | 1.00             | 1.00             |
|                            | 40+ / 30-34.9 / 35-39.9             | -                       | 1.76 (0.88-3.51)     | -     | -                 | -                | -                |
|                            | 40+                                 | -                       | -                    | -     | 5.04 (2.84-8.92)  | 2.65 (1.54-4.56) | 2.33 (1.27-4.29) |
| Serious mental illness     | 30-34.9                             | -                       | -                    | -     | 2.62 (1.76-3.89)  | 1.88 (1.37-2.58) | 2.05 (1.49-2.84) |
|                            | 35-39.9                             | -                       | -                    | -     | 2.60 (1.47-4.61)  | 2.26 (1.47-3.48) | 2.12 (1.36-3.31) |
|                            | 0                                   | -                       | 1.00                 | -     | 1.00              | 1.00             | 1.00             |
|                            | 1 / 2+                              | -                       | 3.16 (1.42-7.03)     | -     | -                 | -                | -                |
|                            | 1                                   | -                       | -                    | -     | 2.22 (1.37-3.60)  | 2.43 (1.61-3.65) | 1.97 (1.32-2.93) |
| Morbidity count            | 2+                                  | -                       | -                    | -     | 3.85 (2.37-6.26)  | 5.27 (3.57-7.78) | 4.13 (2.80-6.10) |
|                            | Flu vaccine                         | -                       | -                    | -     | 1.12 (0.73-1.73)  | 1.09 (0.76-1.56) | 1.47 (1.03-2.08) |
|                            | 0                                   | -                       | 1.00                 | -     | 1.00              | 1.00             | 1.00             |
|                            | 1 / 2 / 3+                          | -                       | 2.22 (0.99-4.95)     | -     | -                 | -                | -                |
|                            | 1                                   | -                       | -                    | -     | 1.88 (1.16-3.02)  | 1.31 (0.88-1.95) | 0.99 (0.61-1.59) |
| Number of SARS-CoV-2 tests | 2 / 3+                              | -                       | -                    | -     | 1.80 (1.00-3.24)  | -                | -                |
|                            | 2                                   | -                       | -                    | -     | -                 | 1.58 (0.83-3.00) | 1.56 (0.82-2.97) |
|                            | 3+                                  | -                       | -                    | -     | -                 | 1.52 (0.80-2.91) | 1.61 (0.85-3.07) |

\* Estimates correspond to a 1-year increase in age (or age-squared as indicated) within the given age categories.

**Supplementary Table 16:** Covariate hazard ratios for Positive SARS-CoV-2 test in the ChAdOx1 vs unvaccinated comparison and the 65+ years subgroup.

| Variable                   | Category                            | Weeks since second dose |                    |                        |                  |                  |                  |
|----------------------------|-------------------------------------|-------------------------|--------------------|------------------------|------------------|------------------|------------------|
|                            |                                     | 3-6                     | 7-10               | 11-14                  | 15-18            | 19-22            | 23-26            |
| Age*                       | 65-70                               | 0.90 (0.80-1.00)        | 0.94 (0.90-0.99)   | 0.95 (0.92-0.99)       | 0.95 (0.92-0.98) | 0.94 (0.91-0.97) | 0.96 (0.93-0.98) |
|                            | 70-75                               | 1.07 (0.94-1.23)        | 0.97 (0.91-1.04)   | 0.92 (0.89-0.95)       | 0.94 (0.92-0.97) | 0.95 (0.93-0.98) | 0.97 (0.95-0.99) |
|                            | 75-80                               | 1.00 (0.82-1.21)        | 0.97 (0.84-1.12)   | 0.98 (0.93-1.04)       | 0.96 (0.92-1.00) | 0.94 (0.91-0.97) | 0.97 (0.93-1.00) |
|                            | 80+                                 | 1.82 (0.18-18.15)       | 9.15 (0.30-280.28) | 119.93 (1.24-11573.46) | 1.09 (0.30-3.93) | 0.60 (0.26-1.37) | 0.93 (0.38-2.27) |
|                            | 80+ squared                         | 1.00 (0.98-1.01)        | 0.99 (0.97-1.01)   | 0.97 (0.95-1.00)       | 1.00 (0.99-1.01) | 1.00 (1.00-1.01) | 1.00 (1.00-1.01) |
| Sex                        | Female                              | 1.00                    | 1.00               | 1.00                   | 1.00             | 1.00             | 1.00             |
|                            | Male                                | 1.08 (0.88-1.32)        | 1.13 (1.02-1.26)   | 1.13 (1.06-1.20)       | 1.16 (1.10-1.22) | 1.06 (1.01-1.11) | 1.09 (1.04-1.13) |
| IMD                        | 1                                   | 1.00                    | 1.00               | 1.00                   | 1.00             | 1.00             | 1.00             |
|                            | 2                                   | 1.01 (0.74-1.39)        | 0.86 (0.73-1.02)   | 0.95 (0.86-1.06)       | 0.84 (0.77-0.91) | 0.93 (0.86-1.01) | 1.02 (0.95-1.10) |
|                            | 3                                   | 0.90 (0.65-1.25)        | 0.81 (0.68-0.96)   | 0.82 (0.74-0.92)       | 0.80 (0.74-0.87) | 0.88 (0.81-0.95) | 1.04 (0.97-1.11) |
|                            | 4                                   | 1.02 (0.74-1.41)        | 0.85 (0.72-1.01)   | 0.85 (0.76-0.94)       | 0.79 (0.72-0.86) | 0.89 (0.82-0.96) | 0.99 (0.92-1.06) |
|                            | 5                                   | 0.86 (0.61-1.20)        | 0.95 (0.81-1.12)   | 0.87 (0.78-0.97)       | 0.77 (0.71-0.84) | 0.80 (0.74-0.87) | 1.00 (0.93-1.07) |
| Ethnicity                  | White                               | 1.00                    | 1.00               | 1.00                   | 1.00             | 1.00             | 1.00             |
|                            | Black / South Asian / Mixed / Other | 2.02 (1.48-2.77)        | -                  | -                      | -                | -                | -                |
|                            | Black                               | -                       | 1.33 (0.87-2.03)   | 1.01 (0.73-1.39)       | 1.25 (0.99-1.59) | 1.08 (0.85-1.39) | 0.98 (0.77-1.24) |
|                            | South Asian                         | -                       | 1.71 (1.36-2.16)   | 1.37 (1.16-1.61)       | 1.36 (1.19-1.56) | 1.19 (1.04-1.36) | 1.03 (0.90-1.17) |
|                            | Mixed / Other                       | -                       | 0.71 (0.43-1.16)   | -                      | -                | -                | -                |
|                            | Mixed                               | -                       | -                  | 0.74 (0.43-1.28)       | 1.19 (0.83-1.70) | 0.62 (0.39-0.98) | 0.80 (0.55-1.15) |
| BMI                        | <30 or missing                      | 1.00                    | 1.00               | 1.00                   | 1.00             | 1.00             | 1.00             |
|                            | 40+                                 | 1.26 (0.71-2.23)        | 1.17 (0.88-1.56)   | 1.50 (1.28-1.75)       | 1.23 (1.06-1.41) | 1.42 (1.25-1.60) | 1.21 (1.08-1.36) |
|                            | 30-34.9                             | 1.39 (1.07-1.80)        | 1.41 (1.24-1.61)   | 1.26 (1.16-1.37)       | 1.28 (1.20-1.37) | 1.26 (1.18-1.34) | 1.21 (1.15-1.28) |
|                            | 35-39.9                             | 1.10 (0.72-1.69)        | 1.20 (0.98-1.48)   | 1.23 (1.09-1.40)       | 1.34 (1.21-1.47) | 1.30 (1.19-1.42) | 1.22 (1.13-1.33) |
| Learning disability        | -                                   | -                       | -                  | 0.69 (0.33-1.46)       | -                | -                |                  |
| Serious mental illness     | 1.47 (0.75-2.86)                    | 0.97 (0.62-1.51)        | 0.60 (0.41-0.86)   | 0.61 (0.46-0.82)       | 0.75 (0.58-0.96) | 0.71 (0.56-0.89) |                  |
| Morbidity count            | 0                                   | 1.00                    | 1.00               | 1.00                   | 1.00             | 1.00             | 1.00             |
|                            | 1                                   | 1.22 (0.96-1.55)        | 1.13 (1.00-1.28)   | 1.16 (1.08-1.25)       | 1.05 (0.99-1.12) | 1.02 (0.96-1.08) | 1.01 (0.96-1.06) |
|                            | 2+                                  | 1.33 (1.00-1.77)        | 1.31 (1.13-1.51)   | 1.22 (1.12-1.33)       | 1.19 (1.11-1.28) | 1.13 (1.06-1.21) | 1.04 (0.98-1.10) |
| Flu vaccine                | 1.62 (1.22-2.16)                    | 1.18 (1.01-1.38)        | 1.32 (1.19-1.47)   | 1.38 (1.26-1.50)       | 1.34 (1.24-1.45) | 1.51 (1.41-1.62) |                  |
| Number of SARS-CoV-2 tests | 0                                   | 1.00                    | 1.00               | 1.00                   | 1.00             | 1.00             | 1.00             |
|                            | 1                                   | 2.06 (1.55-2.73)        | 1.40 (1.19-1.64)   | 1.32 (1.20-1.45)       | 1.37 (1.27-1.48) | 1.28 (1.19-1.38) | 1.30 (1.22-1.38) |
|                            | 2                                   | 1.94 (1.16-3.22)        | 1.50 (1.13-2.01)   | 1.39 (1.16-1.65)       | 1.25 (1.08-1.45) | 1.22 (1.06-1.39) | 1.36 (1.21-1.52) |
|                            | 3+                                  | 2.02 (1.19-3.43)        | 1.75 (1.28-2.40)   | 1.15 (0.93-1.44)       | 1.41 (1.21-1.65) | 1.22 (1.05-1.42) | 1.28 (1.12-1.46) |

\* Estimates correspond to a 1-year increase in age (or age-squared as indicated) within the given age categories.

**Supplementary Table 17: Covariate hazard ratios for Non-COVID-19 death in the ChAdOx1 vs unvaccinated comparison and the 65+ years subgroup.**

| Variable                   | Category         | Weeks since second dose |                  |                  |                  |                  |                  |
|----------------------------|------------------|-------------------------|------------------|------------------|------------------|------------------|------------------|
|                            |                  | 3-6                     | 7-10             | 11-14            | 15-18            | 19-22            | 23-26            |
| Age*                       | 65-70            | 0.97 (0.87-1.07)        | 1.12 (1.02-1.23) | 1.08 (0.98-1.19) | 1.08 (0.98-1.18) | 1.06 (0.97-1.17) | 1.14 (1.04-1.24) |
|                            | 70-75            | 1.17 (1.09-1.26)        | 1.04 (0.97-1.11) | 1.09 (1.02-1.16) | 1.10 (1.04-1.17) | 1.08 (1.01-1.15) | 1.05 (0.99-1.11) |
|                            | 75-80            | 1.10 (1.02-1.19)        | 1.10 (1.03-1.18) | 1.07 (1.00-1.14) | 1.12 (1.05-1.19) | 1.06 (0.99-1.13) | 1.02 (0.96-1.09) |
|                            | 80+              | 1.49 (0.80-2.76)        | 2.85 (1.30-6.25) | 1.45 (0.66-3.16) | 1.07 (0.56-2.07) | 1.35 (0.65-2.82) | 1.51 (0.74-3.06) |
|                            | 80+ squared      | 1.00 (0.99-1.00)        | 0.99 (0.99-1.00) | 1.00 (0.99-1.00) | 1.00 (1.00-1.00) | 1.00 (0.99-1.00) | 1.00 (0.99-1.00) |
| Sex                        | Female           | 1.00                    | 1.00             | 1.00             | 1.00             | 1.00             | 1.00             |
|                            | Male             | 1.44 (1.28-1.62)        | 1.26 (1.13-1.42) | 1.33 (1.19-1.48) | 1.40 (1.26-1.55) | 1.26 (1.14-1.40) | 1.38 (1.25-1.52) |
| IMD                        | 1                | 1.00                    | 1.00             | 1.00             | 1.00             | 1.00             | 1.00             |
|                            | 2                | 0.93 (0.77-1.11)        | 0.82 (0.69-0.98) | 0.82 (0.69-0.98) | 0.84 (0.71-0.98) | 0.89 (0.76-1.05) | 0.74 (0.64-0.87) |
|                            | 3                | 0.81 (0.68-0.98)        | 0.68 (0.57-0.82) | 0.73 (0.61-0.86) | 0.76 (0.64-0.89) | 0.72 (0.61-0.85) | 0.69 (0.60-0.81) |
|                            | 4                | 0.73 (0.60-0.88)        | 0.70 (0.58-0.83) | 0.70 (0.59-0.83) | 0.72 (0.61-0.84) | 0.68 (0.57-0.80) | 0.60 (0.51-0.70) |
|                            | 5                | 0.71 (0.58-0.86)        | 0.63 (0.52-0.75) | 0.67 (0.56-0.80) | 0.65 (0.55-0.77) | 0.63 (0.53-0.75) | 0.59 (0.50-0.70) |
| Ethnicity                  | White            | 1.00                    | 1.00             | 1.00             | 1.00             | 1.00             | 1.00             |
|                            | Black            | 0.41 (0.23-0.72)        | 0.45 (0.25-0.82) | 0.55 (0.31-0.96) | 0.61 (0.37-1.01) | 0.58 (0.33-1.01) | 0.64 (0.38-1.07) |
|                            | South Asian      | 0.49 (0.33-0.71)        | 0.33 (0.21-0.52) | 0.46 (0.31-0.68) | 0.54 (0.38-0.75) | 0.54 (0.38-0.78) | 0.69 (0.50-0.94) |
|                            | Mixed / Other    | 0.55 (0.31-0.96)        | -                | 0.86 (0.54-1.35) | 0.69 (0.43-1.12) | 0.73 (0.45-1.19) | -                |
|                            | Mixed            | -                       | 0.34 (0.11-1.07) | -                | -                | -                | 0.46 (0.17-1.23) |
|                            | Other            | -                       | 0.47 (0.23-1.00) | -                | -                | -                | 0.27 (0.10-0.74) |
| BMI                        | <30 or missing   | 1.00                    | 1.00             | 1.00             | 1.00             | 1.00             | 1.00             |
|                            | 40+              | 1.39 (1.03-1.87)        | 1.44 (1.10-1.89) | 1.12 (0.85-1.49) | 1.30 (1.00-1.68) | 1.14 (0.87-1.49) | 1.22 (0.95-1.56) |
|                            | 30-34.9          | 0.82 (0.69-0.97)        | 0.69 (0.58-0.81) | 0.72 (0.62-0.84) | 0.85 (0.74-0.98) | 0.82 (0.71-0.94) | 0.81 (0.70-0.92) |
|                            | 35-39.9          | 0.98 (0.77-1.25)        | 0.95 (0.76-1.19) | 0.81 (0.65-1.02) | 0.95 (0.78-1.17) | 0.66 (0.52-0.85) | 0.67 (0.53-0.84) |
| Serious mental illness     | 1.69 (1.16-2.47) | 2.20 (1.57-3.08)        | 1.73 (1.21-2.47) | 1.70 (1.21-2.40) | 1.68 (1.18-2.39) | 1.88 (1.36-2.60) |                  |
| Morbidity count            | 0                | 1.00                    | 1.00             | 1.00             | 1.00             | 1.00             | 1.00             |
|                            | 1                | 1.97 (1.66-2.33)        | 2.24 (1.91-2.64) | 1.82 (1.56-2.11) | 1.94 (1.68-2.24) | 1.93 (1.66-2.24) | 1.79 (1.56-2.06) |
|                            | 2+               | 3.73 (3.14-4.42)        | 3.98 (3.38-4.69) | 3.39 (2.92-3.93) | 3.72 (3.22-4.31) | 3.78 (3.26-4.39) | 3.46 (3.01-3.97) |
| Flu vaccine                | 1.18 (0.99-1.40) | 0.88 (0.75-1.04)        | 0.81 (0.69-0.95) | 0.87 (0.75-1.01) | 0.76 (0.65-0.89) | 0.77 (0.66-0.89) |                  |
| Number of SARS-CoV-2 tests | 0                | 1.00                    | 1.00             | 1.00             | 1.00             | 1.00             | 1.00             |
|                            | 1                | 1.24 (1.03-1.50)        | 1.49 (1.26-1.77) | 1.48 (1.26-1.73) | 1.50 (1.29-1.75) | 1.42 (1.21-1.67) | 1.18 (1.00-1.39) |
|                            | 2                | 1.79 (1.37-2.34)        | 1.85 (1.44-2.39) | 2.36 (1.90-2.93) | 1.95 (1.56-2.44) | 2.01 (1.59-2.53) | 2.01 (1.62-2.49) |
|                            | 3+               | 3.86 (3.21-4.65)        | 3.80 (3.16-4.57) | 3.24 (2.68-3.92) | 3.54 (2.97-4.23) | 3.55 (2.97-4.24) | 3.98 (3.37-4.69) |

\* Estimates correspond to a 1-year increase in age (or age-squared as indicated) within the given age categories.

**Supplementary Table 18:** Covariate hazard ratios for Any SARS-CoV-2 test in the ChAdOx1 vs unvaccinated comparison and the 65+ years subgroup.

| Variable                   | Category         | Weeks since second dose |                  |                  |                  |                  |                  |
|----------------------------|------------------|-------------------------|------------------|------------------|------------------|------------------|------------------|
|                            |                  | 3-6                     | 7-10             | 11-14            | 15-18            | 19-22            | 23-26            |
| Age*                       | 65-70            | 0.94 (0.93-0.94)        | 0.93 (0.92-0.94) | 0.93 (0.93-0.94) | 0.94 (0.93-0.95) | 0.94 (0.93-0.94) | 0.94 (0.93-0.95) |
|                            | 70-75            | 0.95 (0.95-0.96)        | 0.95 (0.94-0.95) | 0.95 (0.94-0.95) | 0.94 (0.94-0.95) | 0.94 (0.94-0.95) | 0.95 (0.94-0.95) |
|                            | 75-80            | 0.96 (0.95-0.97)        | 0.96 (0.95-0.96) | 0.95 (0.94-0.96) | 0.96 (0.95-0.96) | 0.95 (0.94-0.96) | 0.94 (0.94-0.95) |
|                            | 80+              | 1.09 (0.91-1.30)        | 1.03 (0.86-1.24) | 0.88 (0.74-1.06) | 0.91 (0.75-1.10) | 0.96 (0.80-1.15) | 0.95 (0.79-1.15) |
|                            | 80+ squared      | 1.00 (1.00-1.00)        | 1.00 (1.00-1.00) | 1.00 (1.00-1.00) | 1.00 (1.00-1.00) | 1.00 (1.00-1.00) | 1.00 (1.00-1.00) |
| Sex                        | Female           | 1.00                    | 1.00             | 1.00             | 1.00             | 1.00             | 1.00             |
|                            | Male             | 0.99 (0.97-1.00)        | 0.99 (0.98-1.00) | 1.01 (1.00-1.03) | 1.01 (1.00-1.02) | 1.01 (1.00-1.02) | 1.02 (1.01-1.03) |
| IMD                        | 1                | 1.00                    | 1.00             | 1.00             | 1.00             | 1.00             | 1.00             |
|                            | 2                | 1.11 (1.09-1.14)        | 1.11 (1.08-1.13) | 1.13 (1.10-1.15) | 1.11 (1.09-1.14) | 1.11 (1.09-1.14) | 1.15 (1.12-1.17) |
|                            | 3                | 1.16 (1.13-1.19)        | 1.17 (1.15-1.20) | 1.20 (1.17-1.22) | 1.17 (1.15-1.20) | 1.20 (1.18-1.23) | 1.25 (1.23-1.28) |
|                            | 4                | 1.26 (1.23-1.29)        | 1.27 (1.24-1.30) | 1.29 (1.26-1.31) | 1.27 (1.24-1.29) | 1.32 (1.29-1.35) | 1.37 (1.34-1.40) |
|                            | 5                | 1.32 (1.29-1.35)        | 1.37 (1.34-1.40) | 1.39 (1.37-1.42) | 1.37 (1.34-1.40) | 1.42 (1.39-1.45) | 1.50 (1.47-1.53) |
| Ethnicity                  | White            | 1.00                    | 1.00             | 1.00             | 1.00             | 1.00             | 1.00             |
|                            | Black            | 0.85 (0.79-0.92)        | 0.83 (0.77-0.90) | 0.84 (0.78-0.90) | 0.82 (0.76-0.88) | 0.81 (0.75-0.87) | 0.80 (0.75-0.86) |
|                            | South Asian      | 0.56 (0.54-0.59)        | 0.57 (0.54-0.59) | 0.57 (0.55-0.60) | 0.63 (0.60-0.66) | 0.60 (0.58-0.63) | 0.64 (0.61-0.67) |
|                            | Mixed            | 0.73 (0.65-0.82)        | 0.76 (0.68-0.84) | 0.82 (0.74-0.90) | 0.76 (0.69-0.84) | 0.84 (0.76-0.92) | 0.81 (0.74-0.89) |
|                            | Other            | 0.67 (0.62-0.73)        | 0.66 (0.61-0.71) | 0.67 (0.62-0.72) | 0.66 (0.62-0.72) | 0.71 (0.66-0.76) | 0.67 (0.62-0.72) |
| BMI                        | <30 or missing   | 1.00                    | 1.00             | 1.00             | 1.00             | 1.00             | 1.00             |
|                            | 40+              | 0.85 (0.82-0.88)        | 0.83 (0.80-0.86) | 0.85 (0.82-0.88) | 0.85 (0.82-0.88) | 0.83 (0.80-0.86) | 0.82 (0.80-0.85) |
|                            | 30-34.9          | 0.95 (0.94-0.97)        | 0.96 (0.95-0.98) | 0.96 (0.94-0.97) | 0.95 (0.93-0.96) | 0.95 (0.93-0.96) | 0.96 (0.94-0.97) |
|                            | 35-39.9          | 0.89 (0.87-0.92)        | 0.90 (0.88-0.92) | 0.89 (0.86-0.91) | 0.90 (0.88-0.92) | 0.90 (0.87-0.92) | 0.89 (0.87-0.91) |
| Learning disability        | 1.60 (1.41-1.81) | 1.62 (1.44-1.82)        | 1.55 (1.38-1.75) | 1.66 (1.48-1.87) | 1.54 (1.37-1.73) | 1.45 (1.29-1.63) |                  |
| Serious mental illness     | 1.00 (0.95-1.06) | 0.94 (0.88-0.99)        | 1.01 (0.96-1.07) | 1.03 (0.97-1.08) | 0.93 (0.88-0.98) | 0.91 (0.86-0.96) |                  |
| Morbidity count            | 0                | 1.00                    | 1.00             | 1.00             | 1.00             | 1.00             | 1.00             |
|                            | 1                | 1.00 (0.99-1.02)        | 0.98 (0.97-1.00) | 0.98 (0.97-0.99) | 0.98 (0.97-0.99) | 0.96 (0.94-0.97) | 0.95 (0.94-0.96) |
|                            | 2+               | 1.08 (1.06-1.10)        | 1.06 (1.04-1.08) | 1.05 (1.03-1.07) | 1.05 (1.04-1.07) | 1.00 (0.98-1.01) | 0.98 (0.96-0.99) |
| Flu vaccine                | 1.58 (1.55-1.62) | 1.56 (1.53-1.59)        | 1.51 (1.48-1.55) | 1.51 (1.48-1.54) | 1.51 (1.48-1.54) | 1.54 (1.51-1.57) |                  |
| Number of SARS-CoV-2 tests | 0                | 1.00                    | 1.00             | 1.00             | 1.00             | 1.00             | 1.00             |
|                            | 1                | 1.57 (1.55-1.60)        | 1.55 (1.52-1.57) | 1.51 (1.49-1.54) | 1.48 (1.45-1.50) | 1.42 (1.40-1.44) | 1.41 (1.39-1.43) |
|                            | 2                | 1.83 (1.78-1.89)        | 1.82 (1.77-1.87) | 1.74 (1.69-1.79) | 1.65 (1.60-1.70) | 1.61 (1.56-1.65) | 1.55 (1.50-1.59) |
|                            | 3+               | 3.15 (3.07-3.24)        | 2.86 (2.79-2.94) | 2.60 (2.53-2.67) | 2.57 (2.51-2.65) | 2.35 (2.29-2.42) | 2.21 (2.15-2.27) |

\* Estimates correspond to a 1-year increase in age (or age-squared as indicated) within the given age categories.

**Supplementary Table 19:** Covariate hazard ratios for COVID-19 hospitalisation in the BNT162b2 vs ChAdOx1 comparison and the 65+ years subgroup.

| Variable                   | Category                            | Weeks since second dose |                        |                      |                   |                  |                  |
|----------------------------|-------------------------------------|-------------------------|------------------------|----------------------|-------------------|------------------|------------------|
|                            |                                     | 3-6                     | 7-10                   | 11-14                | 15-18             | 19-22            | 23-26            |
| Age*                       | 65-70                               | 0.69 (0.45-1.05)        | 1.02 (0.80-1.30)       | 1.09 (0.96-1.23)     | 1.07 (0.96-1.19)  | 1.10 (1.00-1.22) | 0.94 (0.86-1.03) |
|                            | 70-75                               | 1.13 (0.89-1.42)        | 1.11 (0.92-1.35)       | 1.08 (0.96-1.20)     | 1.03 (0.95-1.11)  | 1.03 (0.97-1.10) | 1.03 (0.97-1.10) |
|                            | 75-80                               | 1.01 (0.71-1.43)        | 1.07 (0.85-1.35)       | 1.08 (0.97-1.21)     | 1.06 (0.97-1.15)  | 1.06 (0.99-1.14) | 1.05 (0.98-1.13) |
|                            | 80+                                 | 1.95 (0.08-49.64)       | 23.72 (0.01-112523.80) | 68.82 (0.65-7330.95) | 2.52 (0.60-10.56) | 1.15 (0.41-3.24) | 0.74 (0.34-1.63) |
|                            | 80+ squared                         | 1.00 (0.98-1.01)        | 0.98 (0.93-1.03)       | 0.98 (0.95-1.00)     | 1.00 (0.99-1.00)  | 1.00 (0.99-1.01) | 1.00 (1.00-1.01) |
| Sex                        | Female                              | 1.00                    | 1.00                   | 1.00                 | 1.00              | 1.00             | 1.00             |
|                            | Male                                | 1.56 (0.95-2.57)        | 1.94 (1.33-2.83)       | 1.49 (1.23-1.80)     | 1.57 (1.36-1.80)  | 1.43 (1.27-1.62) | 1.69 (1.51-1.88) |
| IMD                        | 1                                   | 1.00                    | 1.00                   | 1.00                 | 1.00              | 1.00             | 1.00             |
|                            | 2                                   | 0.37 (0.16-0.82)        | 0.85 (0.48-1.48)       | 0.73 (0.56-0.95)     | 0.70 (0.57-0.85)  | 0.77 (0.65-0.92) | 0.83 (0.70-0.98) |
|                            | 3                                   | 0.42 (0.21-0.85)        | 0.89 (0.52-1.53)       | 0.50 (0.38-0.67)     | 0.57 (0.46-0.69)  | 0.64 (0.54-0.77) | 0.66 (0.56-0.78) |
|                            | 4 / 5                               | 0.49 (0.28-0.87)        | -                      | -                    | -                 | -                | -                |
|                            | 4                                   | -                       | 0.90 (0.51-1.59)       | 0.50 (0.38-0.67)     | 0.56 (0.46-0.69)  | 0.55 (0.46-0.66) | 0.68 (0.57-0.80) |
|                            | 5                                   | -                       | 0.60 (0.32-1.12)       | 0.46 (0.34-0.61)     | 0.45 (0.36-0.56)  | 0.43 (0.35-0.53) | 0.56 (0.47-0.67) |
| Ethnicity                  | White                               | 1.00                    | 1.00                   | 1.00                 | 1.00              | 1.00             | 1.00             |
|                            | Black                               | 0.00 (0.00-0.00)        | 0.00 (0.00-0.00)       | -                    | -                 | 0.80 (0.35-1.83) | 0.98 (0.48-1.99) |
|                            | South Asian / Mixed / Other         | 4.74 (2.16-10.39)       | 2.68 (1.40-5.16)       | -                    | -                 | 1.48 (1.13-1.94) | -                |
|                            | Black / South Asian / Mixed / Other | -                       | -                      | 0.91 (0.55-1.50)     | 1.55 (1.16-2.08)  | -                | -                |
|                            | South Asian                         | -                       | -                      | -                    | -                 | -                | 1.60 (1.19-2.15) |
|                            | Mixed                               | -                       | -                      | -                    | -                 | -                | 0.00 (0.00-0.00) |
|                            | Other                               | -                       | -                      | -                    | -                 | -                | 1.65 (0.94-2.91) |
| BMI                        | <30 or missing                      | 1.00                    | 1.00                   | 1.00                 | 1.00              | 1.00             | 1.00             |
|                            | 40+ / 30-34.9 / 35-39.9             | 1.43 (0.85-2.42)        | 1.95 (1.35-2.81)       | -                    | -                 | -                | -                |
|                            | 40+                                 | -                       | -                      | 2.79 (1.99-3.91)     | 2.37 (1.80-3.10)  | 1.89 (1.45-2.45) | 3.04 (2.48-3.73) |
|                            | 30-34.9                             | -                       | -                      | 1.35 (1.08-1.70)     | 1.24 (1.05-1.47)  | 1.49 (1.30-1.71) | 1.27 (1.11-1.45) |
|                            | 35-39.9                             | -                       | -                      | 1.55 (1.12-2.14)     | 1.79 (1.44-2.23)  | 1.56 (1.28-1.91) | 1.69 (1.40-2.03) |
| Serious mental illness     | -                                   | -                       | -                      | 0.89 (0.46-1.72)     | 1.40 (0.88-2.24)  | 1.24 (0.78-1.98) |                  |
| Morbidity count            | 0                                   | 1.00                    | 1.00                   | 1.00                 | 1.00              | 1.00             | 1.00             |
|                            | 1                                   | 1.99 (0.99-4.00)        | 2.48 (1.42-4.31)       | 2.11 (1.59-2.80)     | 1.92 (1.57-2.35)  | 1.95 (1.62-2.34) | 2.15 (1.83-2.53) |
|                            | 2+                                  | 3.78 (1.89-7.59)        | 5.34 (3.14-9.07)       | 4.27 (3.24-5.64)     | 3.82 (3.13-4.67)  | 4.27 (3.57-5.11) | 3.94 (3.35-4.63) |
| Flu vaccine                | -                                   | 0.97 (0.51-1.85)        | 1.24 (0.86-1.79)       | 0.93 (0.74-1.18)     | 1.23 (0.97-1.57)  | 1.42 (1.13-1.79) |                  |
| Number of SARS-CoV-2 tests | 0                                   | 1.00                    | 1.00                   | 1.00                 | 1.00              | 1.00             | 1.00             |
|                            | 1                                   | 1.89 (0.99-3.59)        | 1.74 (1.08-2.82)       | 1.37 (1.05-1.80)     | 1.49 (1.23-1.80)  | 1.57 (1.34-1.84) | 1.28 (1.10-1.50) |
|                            | 2 / 3+                              | 2.77 (1.40-5.46)        | 2.38 (1.38-4.12)       | -                    | -                 | -                | -                |
|                            | 2                                   | -                       | -                      | 1.42 (0.89-2.26)     | 1.56 (1.14-2.14)  | 2.05 (1.61-2.61) | 1.51 (1.18-1.93) |
|                            | 3+                                  | -                       | -                      | 3.03 (2.13-4.31)     | 3.10 (2.42-3.97)  | 2.19 (1.70-2.81) | 1.79 (1.41-2.29) |

\* Estimates correspond to a 1-year increase in age (or age-squared as indicated) within the given age categories.

**Supplementary Table 20:** Covariate hazard ratios for COVID-19 death in the BNT162b2 vs ChAdOx1 comparison and the 65+ years subgroup.

| Variable                   | Category                            | Weeks since second dose |      |                  |                   |                   |                  |
|----------------------------|-------------------------------------|-------------------------|------|------------------|-------------------|-------------------|------------------|
|                            |                                     | 3-6                     | 7-10 | 11-14            | 15-18             | 19-22             | 23-26            |
| Age*                       | 65-70                               | -                       | -    | -                | 0.96 (0.75-1.23)  | 1.17 (0.93-1.47)  | 1.02 (0.76-1.37) |
|                            | 70-75                               | -                       | -    | -                | 1.00 (0.79-1.27)  | 1.10 (0.94-1.29)  | 1.05 (0.88-1.24) |
|                            | 75-80                               | -                       | -    | -                | 1.37 (1.10-1.71)  | 1.15 (0.98-1.35)  | 1.18 (0.99-1.40) |
|                            | 80+                                 | -                       | -    | -                | 0.53 (0.06-4.62)  | 1.41 (0.21-9.59)  | 0.33 (0.10-1.13) |
|                            | 80+ squared                         | -                       | -    | -                | 1.00 (0.99-1.02)  | 1.00 (0.99-1.01)  | 1.01 (1.00-1.01) |
| Sex                        | Female                              | -                       | -    | -                | 1.00              | 1.00              | 1.00             |
|                            | Male                                | -                       | -    | -                | 1.92 (1.31-2.83)  | 2.17 (1.63-2.88)  | 1.84 (1.40-2.41) |
| IMD                        | 1                                   | -                       | -    | -                | 1.00              | 1.00              | 1.00             |
|                            | 2                                   | -                       | -    | -                | 0.61 (0.38-0.97)  | 0.69 (0.46-1.02)  | 0.87 (0.58-1.31) |
|                            | 3                                   | -                       | -    | -                | 0.30 (0.17-0.54)  | 0.61 (0.41-0.91)  | 0.79 (0.53-1.18) |
|                            | 4                                   | -                       | -    | -                | 0.26 (0.14-0.48)  | 0.50 (0.33-0.76)  | 0.65 (0.43-0.99) |
|                            | 5                                   | -                       | -    | -                | 0.43 (0.25-0.73)  | 0.38 (0.24-0.60)  | 0.50 (0.32-0.78) |
| Ethnicity                  | White                               | -                       | -    | -                | 1.00              | 1.00              | 1.00             |
|                            | Black / South Asian / Mixed / Other | -                       | -    | -                | 1.02 (0.42-2.50)  | 0.88 (0.46-1.68)  | 1.81 (1.10-3.00) |
| BMI                        | <30 or missing                      | -                       | -    | -                | 1.00              | 1.00              | 1.00             |
|                            | 40+ / 30-34.9 / 35-39.9             | -                       | -    | -                | 2.46 (1.68-3.60)  | -                 | -                |
|                            | 40+                                 | -                       | -    | -                | -                 | 1.67 (0.90-3.12)  | 1.99 (1.06-3.75) |
|                            | 30-34.9                             | -                       | -    | -                | -                 | 1.33 (0.97-1.82)  | 1.49 (1.09-2.04) |
|                            | 35-39.9                             | -                       | -    | -                | -                 | 1.77 (1.15-2.72)  | 1.76 (1.13-2.74) |
| Morbidity count            | 0                                   | -                       | -    | -                | 1.00              | 1.00              | 1.00             |
|                            | 1                                   | -                       | -    | -                | 2.83 (1.41-5.66)  | 2.53 (1.56-4.11)  | 1.80 (1.18-2.75) |
|                            | 2+                                  | -                       | -    | -                | 7.13 (3.62-14.07) | 6.70 (4.24-10.61) | 4.44 (2.96-6.65) |
| Flu vaccine                | -                                   | -                       | -    | 1.16 (0.56-2.41) | 1.06 (0.63-1.77)  | 1.74 (0.92-3.29)  |                  |
| Number of SARS-CoV-2 tests | 0                                   | -                       | -    | -                | 1.00              | 1.00              | 1.00             |
|                            | 1                                   | -                       | -    | -                | 1.65 (1.01-2.69)  | 1.83 (1.30-2.58)  | 0.80 (0.51-1.25) |
|                            | 2 / 3+                              | -                       | -    | -                | 2.07 (1.19-3.60)  | -                 | -                |
|                            | 2                                   | -                       | -    | -                | -                 | 1.67 (0.93-3.03)  | 0.98 (0.48-1.99) |
|                            | 3+                                  | -                       | -    | -                | -                 | 1.79 (0.99-3.24)  | 1.53 (0.84-2.78) |

\* Estimates correspond to a 1-year increase in age (or age-squared as indicated) within the given age categories.

**Supplementary Table 21: Covariate hazard ratios for Positive SARS-CoV-2 test in the BNT162b2 vs ChAdOx1 comparison and the 65+ years subgroup.**

| Variable                   | Category                            | Weeks since second dose |                    |                    |                  |                  |                  |
|----------------------------|-------------------------------------|-------------------------|--------------------|--------------------|------------------|------------------|------------------|
|                            |                                     | 3-6                     | 7-10               | 11-14              | 15-18            | 19-22            | 23-26            |
| Age*                       | 65-70                               | 0.86 (0.75-0.99)        | 0.94 (0.89-0.98)   | 0.94 (0.91-0.97)   | 0.95 (0.92-0.98) | 0.94 (0.92-0.97) | 0.95 (0.93-0.97) |
|                            | 70-75                               | 1.01 (0.89-1.13)        | 0.96 (0.90-1.03)   | 0.93 (0.90-0.96)   | 0.95 (0.93-0.97) | 0.96 (0.94-0.98) | 0.96 (0.95-0.98) |
|                            | 75-80                               | 1.01 (0.85-1.20)        | 1.03 (0.92-1.17)   | 0.98 (0.93-1.03)   | 0.99 (0.95-1.02) | 0.94 (0.91-0.97) | 0.97 (0.94-1.00) |
|                            | 80+                                 | 2.24 (0.10-49.35)       | 4.42 (0.04-556.84) | 5.86 (0.25-138.49) | 0.54 (0.22-1.32) | 0.56 (0.32-0.99) | 0.98 (0.56-1.69) |
|                            | 80+ squared                         | 1.00 (0.98-1.01)        | 0.99 (0.96-1.02)   | 0.99 (0.97-1.01)   | 1.00 (1.00-1.01) | 1.00 (1.00-1.01) | 1.00 (1.00-1.00) |
| Sex                        | Female                              | 1.00                    | 1.00               | 1.00               | 1.00             | 1.00             | 1.00             |
|                            | Male                                | 1.00 (0.81-1.23)        | 1.18 (1.07-1.31)   | 1.19 (1.12-1.26)   | 1.20 (1.15-1.26) | 1.09 (1.05-1.14) | 1.14 (1.10-1.18) |
| IMD                        | 1                                   | 1.00                    | 1.00               | 1.00               | 1.00             | 1.00             | 1.00             |
|                            | 2                                   | 0.92 (0.64-1.33)        | 0.90 (0.76-1.06)   | 0.94 (0.85-1.03)   | 0.84 (0.78-0.91) | 0.90 (0.84-0.97) | 1.02 (0.95-1.08) |
|                            | 3                                   | 0.86 (0.60-1.22)        | 0.81 (0.68-0.96)   | 0.80 (0.72-0.88)   | 0.80 (0.75-0.87) | 0.85 (0.79-0.91) | 1.01 (0.95-1.07) |
|                            | 4                                   | 0.97 (0.69-1.36)        | 0.93 (0.79-1.09)   | 0.82 (0.74-0.90)   | 0.79 (0.73-0.85) | 0.85 (0.79-0.91) | 0.98 (0.93-1.05) |
|                            | 5                                   | 0.99 (0.71-1.39)        | 0.95 (0.80-1.12)   | 0.86 (0.78-0.95)   | 0.78 (0.72-0.84) | 0.77 (0.72-0.82) | 0.97 (0.91-1.03) |
| Ethnicity                  | White                               | 1.00                    | 1.00               | 1.00               | 1.00             | 1.00             | 1.00             |
|                            | Black / South Asian / Mixed / Other | 2.36 (1.55-3.59)        | 1.20 (0.93-1.54)   | -                  | -                | -                | -                |
|                            | Black                               | -                       | -                  | 1.08 (0.72-1.62)   | 1.00 (0.72-1.39) | 0.92 (0.68-1.26) | 0.72 (0.53-0.98) |
|                            | South Asian / Mixed / Other         | -                       | -                  | 1.14 (0.97-1.34)   | -                | -                | -                |
|                            | South Asian                         | -                       | -                  | -                  | 1.55 (1.37-1.76) | 1.40 (1.25-1.58) | 1.10 (0.98-1.24) |
|                            | Mixed                               | -                       | -                  | -                  | 1.00 (0.66-1.50) | 0.51 (0.30-0.86) | 0.82 (0.57-1.16) |
| BMI                        | <30 or missing                      | 1.00                    | 1.00               | 1.00               | 1.00             | 1.00             | 1.00             |
|                            | 40+                                 | 1.22 (0.68-2.21)        | 1.08 (0.81-1.43)   | 1.45 (1.25-1.68)   | 1.23 (1.08-1.39) | 1.37 (1.23-1.53) | 1.24 (1.13-1.37) |
|                            | 30-34.9                             | 1.19 (0.90-1.56)        | 1.40 (1.24-1.58)   | 1.21 (1.12-1.30)   | 1.25 (1.18-1.33) | 1.22 (1.16-1.28) | 1.17 (1.12-1.23) |
|                            | 35-39.9                             | 1.32 (0.89-1.98)        | 1.20 (0.98-1.46)   | 1.20 (1.07-1.34)   | 1.25 (1.15-1.37) | 1.22 (1.13-1.32) | 1.19 (1.11-1.27) |
| Learning disability        | -                                   | -                       | -                  | 0.74 (0.38-1.42)   | 1.01 (0.60-1.71) | 0.88 (0.55-1.41) |                  |
| Serious mental illness     | -                                   | -                       | -                  | 0.48 (0.35-0.66)   | 0.68 (0.53-0.87) | 0.64 (0.52-0.80) |                  |
| Morbidity count            | 0                                   | 1.00                    | 1.00               | 1.00               | 1.00             | 1.00             | 1.00             |
|                            | 1                                   | 1.14 (0.89-1.46)        | 1.08 (0.96-1.22)   | 1.13 (1.05-1.21)   | 1.05 (0.99-1.10) | 1.02 (0.97-1.07) | 1.00 (0.96-1.04) |
|                            | 2+                                  | 1.13 (0.84-1.51)        | 1.27 (1.11-1.47)   | 1.22 (1.13-1.33)   | 1.22 (1.15-1.29) | 1.14 (1.08-1.20) | 1.06 (1.01-1.11) |
| Flu vaccine                |                                     | 1.83 (1.18-2.84)        | 1.14 (0.97-1.34)   | 1.34 (1.20-1.49)   | 1.36 (1.25-1.48) | 1.39 (1.29-1.50) | 1.54 (1.44-1.64) |
| Number of SARS-CoV-2 tests | 0                                   | 1.00                    | 1.00               | 1.00               | 1.00             | 1.00             | 1.00             |
|                            | 1                                   | 2.01 (1.53-2.66)        | 1.45 (1.25-1.68)   | 1.41 (1.30-1.54)   | 1.34 (1.25-1.43) | 1.33 (1.25-1.41) | 1.26 (1.19-1.33) |
|                            | 2                                   | 1.56 (0.89-2.73)        | 1.49 (1.13-1.96)   | 1.39 (1.18-1.63)   | 1.24 (1.10-1.41) | 1.23 (1.10-1.38) | 1.27 (1.15-1.40) |
|                            | 3+                                  | 2.31 (1.37-3.90)        | 1.50 (1.08-2.09)   | 1.30 (1.07-1.57)   | 1.47 (1.29-1.68) | 1.22 (1.07-1.39) | 1.30 (1.16-1.46) |

\* Estimates correspond to a 1-year increase in age (or age-squared as indicated) within the given age categories.



**Supplementary Table 22:** Covariate hazard ratios for Non-COVID-19 death in the BNT162b2 vs ChAdOx1 comparison and the 65+ years subgroup.

| Variable                   | Category         | Weeks since second dose |                  |                  |                  |                  |                  |
|----------------------------|------------------|-------------------------|------------------|------------------|------------------|------------------|------------------|
|                            |                  | 3-6                     | 7-10             | 11-14            | 15-18            | 19-22            | 23-26            |
| Age*                       | 65-70            | 1.05 (0.96-1.16)        | 1.18 (1.08-1.30) | 1.11 (1.02-1.22) | 1.07 (0.98-1.16) | 1.03 (0.94-1.11) | 1.13 (1.05-1.23) |
|                            | 70-75            | 1.15 (1.08-1.23)        | 1.08 (1.01-1.14) | 1.11 (1.05-1.17) | 1.12 (1.06-1.18) | 1.07 (1.01-1.13) | 1.05 (0.99-1.10) |
|                            | 75-80            | 1.10 (1.03-1.17)        | 1.11 (1.05-1.18) | 1.09 (1.04-1.15) | 1.11 (1.06-1.17) | 1.08 (1.03-1.14) | 1.04 (0.99-1.09) |
|                            | 80+              | 0.89 (0.56-1.41)        | 0.98 (0.61-1.56) | 0.83 (0.56-1.24) | 0.86 (0.57-1.29) | 1.11 (0.70-1.74) | 1.17 (0.78-1.75) |
|                            | 80+ squared      | 1.00 (1.00-1.00)        | 1.00 (1.00-1.00) | 1.00 (1.00-1.00) | 1.00 (1.00-1.00) | 1.00 (1.00-1.00) | 1.00 (1.00-1.00) |
| Sex                        | Female           | 1.00                    | 1.00             | 1.00             | 1.00             | 1.00             | 1.00             |
|                            | Male             | 1.55 (1.41-1.71)        | 1.44 (1.31-1.57) | 1.44 (1.33-1.57) | 1.36 (1.26-1.48) | 1.33 (1.22-1.43) | 1.37 (1.27-1.47) |
| IMD                        | 1                | 1.00                    | 1.00             | 1.00             | 1.00             | 1.00             | 1.00             |
|                            | 2                | 0.91 (0.77-1.08)        | 0.80 (0.69-0.93) | 0.82 (0.71-0.94) | 0.89 (0.78-1.02) | 0.85 (0.74-0.97) | 0.80 (0.71-0.90) |
|                            | 3                | 0.78 (0.66-0.92)        | 0.68 (0.59-0.78) | 0.72 (0.63-0.82) | 0.80 (0.70-0.91) | 0.75 (0.66-0.85) | 0.74 (0.66-0.83) |
|                            | 4                | 0.77 (0.65-0.90)        | 0.68 (0.59-0.78) | 0.74 (0.65-0.84) | 0.79 (0.69-0.89) | 0.72 (0.63-0.81) | 0.66 (0.59-0.75) |
|                            | 5                | 0.73 (0.62-0.86)        | 0.60 (0.52-0.69) | 0.67 (0.59-0.77) | 0.71 (0.63-0.81) | 0.64 (0.56-0.72) | 0.61 (0.54-0.69) |
| Ethnicity                  | White            | 1.00                    | 1.00             | 1.00             | 1.00             | 1.00             | 1.00             |
|                            | Black            | 0.57 (0.23-1.39)        | 0.52 (0.23-1.18) | 0.61 (0.30-1.24) | 1.15 (0.71-1.88) | 1.04 (0.63-1.73) | 1.15 (0.72-1.82) |
|                            | South Asian      | 0.66 (0.44-0.98)        | 0.53 (0.36-0.79) | 0.62 (0.44-0.88) | 0.58 (0.42-0.81) | 0.71 (0.52-0.96) | 0.73 (0.54-0.97) |
|                            | Mixed / Other    | 0.81 (0.44-1.48)        | -                | 1.20 (0.80-1.80) | -                | -                | -                |
|                            | Mixed            | -                       | 0.50 (0.16-1.56) | -                | 1.18 (0.61-2.28) | 0.80 (0.36-1.79) | 1.21 (0.65-2.26) |
|                            | Other            | -                       | 1.06 (0.60-1.89) | -                | 0.83 (0.47-1.48) | 1.06 (0.64-1.77) | 0.72 (0.40-1.31) |
| BMI                        | <30 or missing   | 1.00                    | 1.00             | 1.00             | 1.00             | 1.00             | 1.00             |
|                            | 40+              | 1.28 (0.97-1.68)        | 1.35 (1.06-1.70) | 1.16 (0.92-1.47) | 1.33 (1.07-1.65) | 1.07 (0.85-1.35) | 1.28 (1.05-1.56) |
|                            | 30-34.9          | 0.75 (0.65-0.87)        | 0.68 (0.60-0.78) | 0.86 (0.77-0.96) | 0.87 (0.78-0.97) | 0.83 (0.75-0.93) | 0.81 (0.73-0.90) |
|                            | 35-39.9          | 1.05 (0.86-1.28)        | 0.88 (0.73-1.07) | 0.88 (0.73-1.05) | 0.95 (0.80-1.12) | 0.69 (0.57-0.84) | 0.78 (0.66-0.92) |
| Serious mental illness     | 1.73 (1.18-2.54) | 1.69 (1.19-2.39)        | 1.90 (1.40-2.57) | 1.24 (0.86-1.77) | 1.62 (1.18-2.23) | 1.69 (1.26-2.27) |                  |
| Morbidity count            | 0                | 1.00                    | 1.00             | 1.00             | 1.00             | 1.00             | 1.00             |
|                            | 1                | 1.88 (1.63-2.18)        | 1.83 (1.61-2.08) | 1.77 (1.57-1.99) | 1.74 (1.55-1.95) | 1.77 (1.58-1.99) | 1.70 (1.52-1.89) |
|                            | 2+               | 3.44 (2.98-3.97)        | 3.19 (2.80-3.64) | 3.18 (2.82-3.58) | 3.16 (2.82-3.55) | 3.34 (2.98-3.74) | 3.25 (2.92-3.62) |
| Flu vaccine                | 0.76 (0.64-0.89) | 0.78 (0.67-0.91)        | 0.72 (0.63-0.82) | 0.80 (0.70-0.92) | 0.73 (0.64-0.84) | 0.78 (0.69-0.88) |                  |
| Number of SARS-CoV-2 tests | 0                | 1.00                    | 1.00             | 1.00             | 1.00             | 1.00             | 1.00             |
|                            | 1                | 1.28 (1.10-1.49)        | 1.46 (1.28-1.66) | 1.43 (1.27-1.61) | 1.33 (1.18-1.50) | 1.34 (1.19-1.51) | 1.21 (1.07-1.35) |
|                            | 2                | 1.71 (1.37-2.14)        | 1.96 (1.62-2.37) | 2.23 (1.90-2.63) | 1.96 (1.66-2.32) | 2.02 (1.71-2.39) | 1.87 (1.60-2.20) |
|                            | 3+               | 3.98 (3.40-4.65)        | 3.83 (3.31-4.42) | 3.31 (2.87-3.82) | 3.53 (3.08-4.04) | 3.69 (3.23-4.21) | 3.62 (3.19-4.09) |

\* Estimates correspond to a 1-year increase in age (or age-squared as indicated) within the given age categories.

**Supplementary Table 23:** Covariate hazard ratios for Any SARS-CoV-2 test in the BNT162b2 vs ChAdOx1 comparison and the 65+ years subgroup.

| Variable                   | Category       | Weeks since second dose |                  |                  |                  |                  |                  |
|----------------------------|----------------|-------------------------|------------------|------------------|------------------|------------------|------------------|
|                            |                | 3-6                     | 7-10             | 11-14            | 15-18            | 19-22            | 23-26            |
| Age*                       | 65-70          | 0.94 (0.93-0.94)        | 0.93 (0.93-0.94) | 0.93 (0.93-0.94) | 0.94 (0.93-0.94) | 0.94 (0.93-0.94) | 0.94 (0.94-0.95) |
|                            | 70-75          | 0.95 (0.95-0.96)        | 0.95 (0.94-0.95) | 0.95 (0.94-0.95) | 0.94 (0.94-0.95) | 0.94 (0.94-0.95) | 0.95 (0.94-0.95) |
|                            | 75-80          | 0.96 (0.95-0.97)        | 0.96 (0.95-0.96) | 0.95 (0.95-0.96) | 0.96 (0.95-0.96) | 0.95 (0.95-0.96) | 0.95 (0.94-0.96) |
|                            | 80+            | 0.64 (0.57-0.71)        | 0.62 (0.56-0.69) | 0.59 (0.53-0.65) | 0.56 (0.51-0.62) | 0.59 (0.53-0.65) | 0.57 (0.51-0.62) |
|                            | 80+ squared    | 1.00 (1.00-1.00)        | 1.00 (1.00-1.00) | 1.00 (1.00-1.00) | 1.00 (1.00-1.00) | 1.00 (1.00-1.00) | 1.00 (1.00-1.00) |
| Sex                        | Female         | 1.00                    | 1.00             | 1.00             | 1.00             | 1.00             | 1.00             |
|                            | Male           | 1.01 (1.00-1.02)        | 1.01 (1.00-1.02) | 1.03 (1.02-1.04) | 1.02 (1.01-1.03) | 1.02 (1.01-1.03) | 1.03 (1.02-1.04) |
| IMD                        | 1              | 1.00                    | 1.00             | 1.00             | 1.00             | 1.00             | 1.00             |
|                            | 2              | 1.12 (1.10-1.14)        | 1.12 (1.10-1.14) | 1.14 (1.12-1.16) | 1.11 (1.09-1.13) | 1.12 (1.10-1.14) | 1.14 (1.12-1.16) |
|                            | 3              | 1.17 (1.14-1.19)        | 1.19 (1.16-1.21) | 1.20 (1.18-1.22) | 1.18 (1.16-1.20) | 1.20 (1.18-1.22) | 1.25 (1.23-1.27) |
|                            | 4              | 1.24 (1.22-1.26)        | 1.27 (1.25-1.29) | 1.28 (1.26-1.30) | 1.26 (1.24-1.28) | 1.31 (1.29-1.33) | 1.36 (1.33-1.38) |
|                            | 5              | 1.30 (1.28-1.33)        | 1.36 (1.33-1.38) | 1.38 (1.35-1.40) | 1.36 (1.33-1.38) | 1.40 (1.38-1.43) | 1.47 (1.44-1.49) |
| Ethnicity                  | White          | 1.00                    | 1.00             | 1.00             | 1.00             | 1.00             | 1.00             |
|                            | Black          | 0.87 (0.80-0.93)        | 0.85 (0.79-0.92) | 0.84 (0.78-0.90) | 0.84 (0.78-0.90) | 0.82 (0.76-0.88) | 0.85 (0.79-0.91) |
|                            | South Asian    | 0.58 (0.56-0.61)        | 0.59 (0.57-0.62) | 0.59 (0.56-0.61) | 0.63 (0.61-0.66) | 0.61 (0.59-0.64) | 0.63 (0.61-0.65) |
|                            | Mixed          | 0.74 (0.67-0.81)        | 0.82 (0.75-0.90) | 0.81 (0.74-0.88) | 0.77 (0.71-0.84) | 0.80 (0.73-0.87) | 0.85 (0.78-0.91) |
|                            | Other          | 0.69 (0.64-0.74)        | 0.68 (0.63-0.73) | 0.68 (0.63-0.72) | 0.72 (0.68-0.77) | 0.74 (0.70-0.78) | 0.72 (0.68-0.76) |
| BMI                        | <30 or missing | 1.00                    | 1.00             | 1.00             | 1.00             | 1.00             | 1.00             |
|                            | 40+            | 0.84 (0.81-0.87)        | 0.84 (0.81-0.87) | 0.85 (0.82-0.87) | 0.84 (0.81-0.86) | 0.82 (0.80-0.84) | 0.82 (0.79-0.84) |
|                            | 30-34.9        | 0.96 (0.94-0.97)        | 0.96 (0.94-0.97) | 0.95 (0.94-0.96) | 0.94 (0.93-0.95) | 0.94 (0.93-0.95) | 0.94 (0.93-0.96) |
|                            | 35-39.9        | 0.90 (0.89-0.92)        | 0.91 (0.89-0.93) | 0.90 (0.88-0.91) | 0.90 (0.88-0.92) | 0.88 (0.86-0.90) | 0.87 (0.86-0.89) |
| Learning disability        |                | 1.55 (1.39-1.73)        | 1.51 (1.36-1.68) | 1.44 (1.29-1.59) | 1.60 (1.44-1.77) | 1.52 (1.38-1.68) | 1.38 (1.25-1.52) |
| Serious mental illness     |                | 0.92 (0.87-0.97)        | 0.92 (0.88-0.97) | 0.97 (0.93-1.02) | 0.99 (0.94-1.04) | 0.92 (0.88-0.96) | 0.90 (0.86-0.94) |
| Morbidity count            | 0              | 1.00                    | 1.00             | 1.00             | 1.00             | 1.00             | 1.00             |
|                            | 1              | 1.00 (0.98-1.01)        | 0.99 (0.98-1.00) | 0.98 (0.97-0.99) | 0.99 (0.97-1.00) | 0.97 (0.96-0.98) | 0.95 (0.94-0.96) |
|                            | 2+             | 1.09 (1.08-1.11)        | 1.07 (1.06-1.09) | 1.05 (1.04-1.07) | 1.07 (1.05-1.08) | 1.02 (1.01-1.03) | 1.00 (0.99-1.01) |
| Flu vaccine                |                | 1.52 (1.49-1.55)        | 1.52 (1.49-1.55) | 1.50 (1.47-1.52) | 1.49 (1.47-1.52) | 1.49 (1.47-1.52) | 1.52 (1.50-1.55) |
| Number of SARS-CoV-2 tests | 0              | 1.00                    | 1.00             | 1.00             | 1.00             | 1.00             | 1.00             |
|                            | 1              | 1.57 (1.55-1.59)        | 1.52 (1.50-1.54) | 1.49 (1.47-1.51) | 1.45 (1.43-1.47) | 1.41 (1.39-1.43) | 1.40 (1.38-1.41) |
|                            | 2              | 1.83 (1.79-1.88)        | 1.76 (1.72-1.80) | 1.69 (1.65-1.72) | 1.64 (1.60-1.68) | 1.58 (1.54-1.61) | 1.52 (1.49-1.55) |
|                            | 3+             | 3.14 (3.07-3.21)        | 2.84 (2.78-2.91) | 2.59 (2.53-2.64) | 2.56 (2.51-2.62) | 2.39 (2.34-2.44) | 2.23 (2.19-2.28) |

\* Estimates correspond to a 1-year increase in age (or age-squared as indicated) within the given age categories.

**Supplementary Table 24:** Covariate hazard ratios for COVID-19 hospitalisation in the BNT162b2 vs unvaccinated comparison and the 18-64 years and clinically vulnerable subgroup.

| Variable                   | Category                            | Weeks since second dose |                  |                  |                  |                  |                  |
|----------------------------|-------------------------------------|-------------------------|------------------|------------------|------------------|------------------|------------------|
|                            |                                     | 3-6                     | 7-10             | 11-14            | 15-18            | 19-22            | 23-26            |
| Age*                       | 18-64                               | 1.14 (1.03-1.25)        | 1.01 (0.96-1.07) | 1.02 (0.97-1.06) | 1.00 (0.96-1.05) | 1.04 (0.98-1.10) | 1.04 (0.98-1.10) |
|                            | 18-64 squared                       | 1.00 (1.00-1.00)        | 1.00 (1.00-1.00) | 1.00 (1.00-1.00) | 1.00 (1.00-1.00) | 1.00 (1.00-1.00) | 1.00 (1.00-1.00) |
| Sex                        | Female                              | -                       | 1.00             | 1.00             | 1.00             | 1.00             | 1.00             |
|                            | Male                                | -                       | 0.89 (0.74-1.08) | 0.96 (0.82-1.13) | 0.94 (0.80-1.11) | 1.08 (0.90-1.28) | 1.19 (1.00-1.41) |
| IMD                        | 1                                   | 1.00                    | 1.00             | 1.00             | 1.00             | 1.00             | 1.00             |
|                            | 2 / 3 / 4 / 5                       | 0.77 (0.55-1.08)        | -                | -                | -                | -                | -                |
|                            | 2                                   | -                       | 0.95 (0.75-1.21) | 1.16 (0.95-1.42) | 0.92 (0.74-1.14) | 1.08 (0.85-1.36) | 1.14 (0.91-1.43) |
|                            | 3                                   | -                       | 1.25 (0.97-1.62) | 1.01 (0.79-1.30) | 0.78 (0.60-1.00) | 1.10 (0.84-1.44) | 1.30 (1.03-1.66) |
|                            | 4 / 5                               | -                       | 0.81 (0.62-1.07) | -                | -                | -                | -                |
|                            | 4                                   | -                       | -                | 0.95 (0.72-1.26) | 0.95 (0.73-1.24) | 1.10 (0.82-1.48) | 0.98 (0.74-1.30) |
| Ethnicity                  | 5                                   | -                       | -                | 1.25 (0.92-1.68) | 0.72 (0.51-1.02) | 1.16 (0.83-1.61) | 1.22 (0.90-1.67) |
|                            | White                               | 1.00                    | 1.00             | 1.00             | 1.00             | 1.00             | 1.00             |
|                            | Black / South Asian / Mixed / Other | 1.75 (1.24-2.46)        | -                | 1.61 (1.35-1.91) | 1.22 (1.01-1.49) | -                | 0.93 (0.74-1.15) |
|                            | Black                               | -                       | 1.34 (0.97-1.84) | -                | -                | 1.42 (1.05-1.92) | -                |
| BMI                        | South Asian / Mixed / Other         | -                       | 1.27 (1.00-1.61) | -                | -                | 1.34 (1.06-1.68) | -                |
|                            | <30 or missing                      | 1.00                    | 1.00             | 1.00             | 1.00             | 1.00             | 1.00             |
|                            | 40+ / 30-34.9 / 35-39.9             | 1.78 (1.31-2.42)        | -                | -                | -                | -                | -                |
|                            | 40+                                 | -                       | 2.49 (1.90-3.25) | 2.27 (1.79-2.88) | 2.45 (1.96-3.08) | 3.03 (2.39-3.85) | 3.42 (2.73-4.28) |
|                            | 30-34.9                             | -                       | 1.39 (1.06-1.82) | 1.78 (1.44-2.21) | 1.47 (1.18-1.84) | 1.67 (1.31-2.12) | 1.41 (1.11-1.80) |
| Learning disability        | 35-39.9                             | -                       | 2.41 (1.81-3.22) | 2.45 (1.92-3.12) | 1.41 (1.05-1.90) | 2.53 (1.94-3.31) | 1.99 (1.50-2.62) |
|                            | Learning disability                 | -                       | -                | -                | -                | -                | 1.13 (0.65-1.95) |
| Serious mental illness     | Serious mental illness              | -                       | 0.60 (0.39-0.92) | 0.77 (0.55-1.07) | -                | 0.88 (0.61-1.27) | 0.69 (0.48-1.01) |
|                            | Morbidity count                     | 0                       | 1.00             | 1.00             | 1.00             | 1.00             | 1.00             |
| 1 / 2+                     |                                     | 0.95 (0.67-1.35)        | -                | 1.24 (0.99-1.56) | -                | -                | -                |
| 1                          |                                     | -                       | 1.07 (0.81-1.40) | -                | 1.44 (1.15-1.80) | 1.26 (0.98-1.62) | 1.16 (0.90-1.48) |
| Flu vaccine                | 2+                                  | -                       | 1.36 (0.97-1.90) | -                | 2.15 (1.66-2.79) | 1.86 (1.39-2.49) | 1.86 (1.40-2.47) |
|                            | Flu vaccine                         | -                       | 1.08 (0.88-1.32) | 1.20 (1.02-1.42) | 1.17 (0.98-1.41) | 1.25 (1.03-1.50) | 1.10 (0.91-1.32) |
| Number of SARS-CoV-2 tests | 0                                   | 1.00                    | 1.00             | 1.00             | 1.00             | 1.00             | 1.00             |
|                            | 1 / 2 / 3+                          | 1.34 (0.96-1.86)        | -                | -                | -                | -                | -                |
|                            | 1                                   | -                       | 1.73 (1.38-2.18) | 1.21 (0.97-1.51) | 1.22 (0.97-1.54) | 1.58 (1.26-1.99) | 1.65 (1.33-2.05) |
|                            | 2                                   | -                       | 1.57 (1.09-2.27) | 1.61 (1.18-2.19) | 1.83 (1.36-2.45) | 1.97 (1.43-2.71) | 1.92 (1.41-2.64) |
|                            | 3+                                  | -                       | 1.62 (1.14-2.31) | 2.21 (1.71-2.87) | 1.81 (1.36-2.41) | 2.14 (1.58-2.90) | 2.64 (2.00-3.50) |

\* Estimates correspond to a 1-year increase in age (or age-squared as indicated) within the given age categories.

**Supplementary Table 25:** Covariate hazard ratios for COVID-19 death in the BNT162b2 vs unvaccinated comparison and the 18-64 years and clinically vulnerable subgroup.

| Variable                   | Category                            | Weeks since second dose |      |       |                  |                  |                   |
|----------------------------|-------------------------------------|-------------------------|------|-------|------------------|------------------|-------------------|
|                            |                                     | 3-6                     | 7-10 | 11-14 | 15-18            | 19-22            | 23-26             |
| Age*                       | 18-64                               | -                       | -    | -     | 1.13 (0.95-1.33) | 1.10 (0.89-1.35) | 1.14 (0.91-1.42)  |
|                            | 18-64 squared                       | -                       | -    | -     | 1.00 (1.00-1.00) | 1.00 (1.00-1.00) | 1.00 (1.00-1.00)  |
| Sex                        | Female                              | -                       | -    | -     | -                | 1.00             | 1.00              |
|                            | Male                                | -                       | -    | -     | -                | 1.83 (1.16-2.89) | 1.76 (0.99-3.14)  |
| IMD                        | 1                                   | -                       | -    | -     | 1.00             | 1.00             | 1.00              |
|                            | 2 / 3 / 4 / 5                       | -                       | -    | -     | 0.68 (0.43-1.09) | 1.36 (0.83-2.24) | -                 |
|                            | 2                                   | -                       | -    | -     | -                | -                | 1.56 (0.81-3.03)  |
|                            | 3 / 4 / 5                           | -                       | -    | -     | -                | -                | 0.94 (0.48-1.86)  |
| Ethnicity                  | White                               | -                       | -    | -     | 1.00             | 1.00             | 1.00              |
|                            | Black                               | -                       | -    | -     | 1.26 (0.55-2.84) | 1.59 (0.70-3.58) | -                 |
|                            | South Asian                         | -                       | -    | -     | 0.88 (0.39-2.01) | -                | -                 |
|                            | Mixed                               | -                       | -    | -     | 0.00 (0.00-0.00) | -                | -                 |
|                            | Other                               | -                       | -    | -     | 1.90 (0.66-5.46) | -                | -                 |
|                            | South Asian / Mixed / Other         | -                       | -    | -     | -                | 1.46 (0.79-2.68) | -                 |
| BMI                        | Black / South Asian / Mixed / Other | -                       | -    | -     | -                | -                | 0.55 (0.27-1.14)  |
|                            | <30 or missing                      | -                       | -    | -     | 1.00             | 1.00             | 1.00              |
|                            | 40+ / 30-34.9 / 35-39.9             | -                       | -    | -     | 2.11 (1.35-3.29) | 2.84 (1.79-4.50) | -                 |
|                            | 40+                                 | -                       | -    | -     | -                | -                | 5.39 (2.48-11.70) |
|                            | 30-34.9 / 35-39.9                   | -                       | -    | -     | -                | -                | 2.51 (1.33-4.73)  |
| Morbidity count            | 0                                   | -                       | -    | -     | 1.00             | 1.00             | 1.00              |
|                            | 1 / 2+                              | -                       | -    | -     | 1.00 (0.57-1.76) | -                | -                 |
|                            | 1                                   | -                       | -    | -     | -                | 0.65 (0.35-1.22) | 1.21 (0.52-2.80)  |
|                            | 2+                                  | -                       | -    | -     | -                | 2.20 (1.15-4.21) | 2.95 (1.25-6.99)  |
| Number of SARS-CoV-2 tests | 0                                   | -                       | -    | -     | 1.00             | 1.00             | 1.00              |
|                            | 1 / 2 / 3+                          | -                       | -    | -     | 1.13 (0.67-1.90) | -                | 1.54 (0.88-2.69)  |
|                            | 1                                   | -                       | -    | -     | -                | 1.23 (0.66-2.30) | -                 |
|                            | 2 / 3+                              | -                       | -    | -     | -                | 1.31 (0.68-2.53) | -                 |

\* Estimates correspond to a 1-year increase in age (or age-squared as indicated) within the given age categories.

**Supplementary Table 26:** Covariate hazard ratios for Positive SARS-CoV-2 test in the BNT162b2 vs unvaccinated comparison and the 18-64 years and clinically vulnerable subgroup.

| Variable                   | Category                            | Weeks since second dose |                  |                  |                  |                  |                  |
|----------------------------|-------------------------------------|-------------------------|------------------|------------------|------------------|------------------|------------------|
|                            |                                     | 3-6                     | 7-10             | 11-14            | 15-18            | 19-22            | 23-26            |
| Age*                       | 18-64                               | 0.96 (0.93-0.98)        | 0.97 (0.95-0.98) | 0.98 (0.97-1.00) | 1.02 (1.01-1.04) | 1.09 (1.07-1.11) | 1.09 (1.08-1.11) |
|                            | 18-64 squared                       | 1.00 (1.00-1.00)        | 1.00 (1.00-1.00) | 1.00 (1.00-1.00) | 1.00 (1.00-1.00) | 1.00 (1.00-1.00) | 1.00 (1.00-1.00) |
| Sex                        | Female                              | 1.00                    | 1.00             | 1.00             | 1.00             | 1.00             | 1.00             |
|                            | Male                                | 0.89 (0.80-0.98)        | 0.94 (0.88-1.00) | 0.89 (0.84-0.94) | 0.87 (0.82-0.91) | 0.81 (0.77-0.85) | 0.83 (0.80-0.87) |
| IMD                        | 1                                   | 1.00                    | 1.00             | 1.00             | 1.00             | 1.00             | 1.00             |
|                            | 2                                   | 1.00 (0.88-1.15)        | 1.04 (0.96-1.12) | 1.06 (0.99-1.14) | 1.08 (1.00-1.16) | 1.12 (1.04-1.20) | 1.05 (0.98-1.12) |
|                            | 3                                   | 1.11 (0.96-1.29)        | 1.13 (1.03-1.23) | 0.97 (0.90-1.05) | 1.04 (0.96-1.13) | 1.14 (1.06-1.24) | 1.15 (1.07-1.23) |
|                            | 4                                   | 1.18 (1.01-1.38)        | 1.09 (0.99-1.20) | 1.09 (1.00-1.18) | 1.05 (0.97-1.14) | 1.16 (1.07-1.26) | 1.19 (1.11-1.28) |
|                            | 5                                   | 1.15 (0.96-1.38)        | 1.16 (1.05-1.29) | 1.02 (0.93-1.12) | 0.99 (0.90-1.09) | 1.21 (1.11-1.32) | 1.24 (1.15-1.33) |
| Ethnicity                  | White                               | 1.00                    | 1.00             | 1.00             | 1.00             | 1.00             | 1.00             |
|                            | Black / South Asian / Mixed / Other | 1.24 (1.11-1.39)        | -                | -                | -                | -                | -                |
|                            | Black                               | -                       | 1.06 (0.94-1.21) | 1.08 (0.97-1.21) | 0.96 (0.85-1.08) | 0.90 (0.79-1.03) | 0.71 (0.62-0.81) |
|                            | South Asian                         | -                       | 0.74 (0.66-0.82) | 0.88 (0.80-0.96) | 0.85 (0.77-0.94) | 0.84 (0.76-0.93) | 0.91 (0.83-1.00) |
|                            | Mixed                               | -                       | 0.95 (0.79-1.15) | 1.00 (0.85-1.18) | 1.17 (1.00-1.38) | 1.19 (1.01-1.41) | 0.81 (0.67-0.97) |
| BMI                        | Other                               | -                       | 0.55 (0.43-0.70) | 0.97 (0.82-1.14) | 0.72 (0.59-0.88) | 0.78 (0.64-0.96) | 0.72 (0.60-0.87) |
|                            | <30 or missing                      | 1.00                    | 1.00             | 1.00             | 1.00             | 1.00             | 1.00             |
|                            | 40+                                 | 1.00 (0.85-1.17)        | 1.07 (0.97-1.18) | 1.13 (1.04-1.23) | 1.26 (1.16-1.36) | 1.26 (1.16-1.36) | 1.19 (1.11-1.28) |
|                            | 30-34.9                             | 1.14 (0.98-1.32)        | 1.27 (1.17-1.38) | 1.19 (1.11-1.28) | 1.16 (1.08-1.25) | 1.15 (1.07-1.24) | 1.13 (1.06-1.20) |
|                            | 35-39.9                             | 1.33 (1.11-1.59)        | 1.24 (1.11-1.38) | 1.18 (1.08-1.29) | 1.34 (1.23-1.46) | 1.26 (1.15-1.38) | 1.17 (1.08-1.27) |
| Learning disability        | -                                   | 0.43 (0.35-0.53)        | 0.54 (0.45-0.64) | 0.55 (0.46-0.66) | 0.55 (0.46-0.66) | 0.59 (0.50-0.69) |                  |
| Serious mental illness     | 0.49 (0.39-0.62)                    | 0.52 (0.45-0.60)        | 0.60 (0.53-0.68) | 0.54 (0.47-0.62) | 0.50 (0.44-0.58) | 0.55 (0.49-0.61) |                  |
| Morbidity count            | 0                                   | 1.00                    | 1.00             | 1.00             | 1.00             | 1.00             | 1.00             |
|                            | 1                                   | 0.99 (0.86-1.14)        | 0.94 (0.85-1.03) | 1.00 (0.93-1.08) | 1.04 (0.96-1.12) | 0.98 (0.91-1.06) | 0.95 (0.89-1.02) |
|                            | 2+                                  | 0.93 (0.75-1.15)        | 0.86 (0.76-0.97) | 0.95 (0.86-1.05) | 1.05 (0.95-1.16) | 0.92 (0.83-1.02) | 0.92 (0.85-1.00) |
| Flu vaccine                | 0.96 (0.86-1.06)                    | 0.96 (0.90-1.03)        | 1.00 (0.95-1.06) | 1.08 (1.02-1.15) | 1.10 (1.03-1.16) | 1.09 (1.04-1.15) |                  |
| Number of SARS-CoV-2 tests | 0                                   | 1.00                    | 1.00             | 1.00             | 1.00             | 1.00             | 1.00             |
|                            | 1                                   | 1.64 (1.46-1.86)        | 1.73 (1.61-1.86) | 1.58 (1.48-1.68) | 1.50 (1.41-1.60) | 1.35 (1.27-1.44) | 1.39 (1.31-1.47) |
|                            | 2                                   | 1.92 (1.61-2.30)        | 1.73 (1.55-1.93) | 1.77 (1.61-1.94) | 1.65 (1.50-1.81) | 1.39 (1.26-1.54) | 1.52 (1.40-1.65) |
|                            | 3+                                  | 1.94 (1.62-2.32)        | 1.89 (1.69-2.11) | 1.79 (1.62-1.97) | 1.72 (1.56-1.89) | 1.48 (1.33-1.64) | 1.56 (1.42-1.70) |
| Pregnancy                  | -                                   | 0.90 (0.77-1.05)        | 1.03 (0.90-1.19) | 1.18 (1.01-1.38) | 1.12 (0.94-1.34) | 1.33 (1.13-1.57) |                  |

\* Estimates correspond to a 1-year increase in age (or age-squared as indicated) within the given age categories.

**Supplementary Table 27:** Covariate hazard ratios for Non-COVID-19 death in the BNT162b2 vs unvaccinated comparison and the 18-64 years and clinically vulnerable subgroup.

| Variable                   | Category                            | Weeks since second dose |                  |                  |                  |                  |                  |
|----------------------------|-------------------------------------|-------------------------|------------------|------------------|------------------|------------------|------------------|
|                            |                                     | 3-6                     | 7-10             | 11-14            | 15-18            | 19-22            | 23-26            |
| Age*                       | 18-64                               | 1.17 (1.04-1.32)        | 1.11 (0.98-1.26) | 1.10 (0.98-1.23) | 1.19 (1.03-1.38) | 1.12 (0.99-1.25) | 1.13 (0.99-1.28) |
|                            | 18-64 squared                       | 1.00 (1.00-1.00)        | 1.00 (1.00-1.00) | 1.00 (1.00-1.00) | 1.00 (1.00-1.00) | 1.00 (1.00-1.00) | 1.00 (1.00-1.00) |
| Sex                        | Female                              | 1.00                    | 1.00             | 1.00             | 1.00             | 1.00             | 1.00             |
|                            | Male                                | 1.89 (1.46-2.46)        | 1.43 (1.12-1.82) | 1.57 (1.23-2.01) | 1.35 (1.04-1.74) | 1.77 (1.36-2.30) | 1.51 (1.17-1.94) |
| IMD                        | 1                                   | 1.00                    | 1.00             | 1.00             | 1.00             | 1.00             | 1.00             |
|                            | 2                                   | 0.84 (0.61-1.17)        | 0.82 (0.60-1.13) | 0.75 (0.54-1.05) | 0.78 (0.55-1.11) | 0.69 (0.47-1.01) | 0.93 (0.67-1.29) |
|                            | 3                                   | 0.87 (0.61-1.23)        | 0.74 (0.52-1.05) | 0.68 (0.47-1.00) | 0.70 (0.48-1.02) | 0.84 (0.58-1.23) | 0.85 (0.59-1.22) |
|                            | 4                                   | 0.62 (0.41-0.95)        | 0.78 (0.54-1.13) | 0.87 (0.60-1.26) | 0.87 (0.60-1.25) | 0.95 (0.65-1.39) | -                |
|                            | 5                                   | 0.70 (0.44-1.12)        | 0.54 (0.34-0.87) | 0.70 (0.46-1.08) | 0.56 (0.35-0.90) | 0.78 (0.51-1.20) | -                |
|                            | 4 / 5                               | -                       | -                | -                | -                | -                | 0.62 (0.44-0.86) |
| Ethnicity                  | White                               | 1.00                    | 1.00             | 1.00             | 1.00             | 1.00             | 1.00             |
|                            | Black                               | 0.52 (0.27-1.02)        | -                | 0.22 (0.08-0.60) | -                | 0.99 (0.55-1.76) | 0.84 (0.43-1.64) |
|                            | South Asian / Mixed / Other         | 0.40 (0.24-0.67)        | -                | 0.59 (0.38-0.92) | -                | 0.42 (0.24-0.73) | 0.90 (0.57-1.40) |
|                            | Black / South Asian / Mixed / Other | -                       | 0.56 (0.38-0.83) | -                | 0.53 (0.34-0.84) | -                | -                |
| BMI                        | <30 or missing                      | 1.00                    | 1.00             | 1.00             | 1.00             | 1.00             | 1.00             |
|                            | 40+                                 | 1.11 (0.74-1.68)        | 0.73 (0.46-1.14) | 1.08 (0.73-1.59) | 0.77 (0.49-1.23) | 0.82 (0.54-1.24) | 1.03 (0.68-1.54) |
|                            | 30-34.9                             | 0.77 (0.54-1.10)        | 0.59 (0.42-0.84) | 0.71 (0.50-0.99) | 0.75 (0.53-1.05) | 0.53 (0.36-0.78) | 0.66 (0.47-0.94) |
|                            | 35-39.9                             | 1.09 (0.73-1.63)        | 0.79 (0.53-1.19) | 0.50 (0.29-0.84) | 0.86 (0.57-1.31) | 0.54 (0.32-0.90) | 0.91 (0.61-1.35) |
|                            | Learning disability                 | 1.29 (0.62-2.69)        | -                | 1.06 (0.47-2.39) | -                | 2.19 (1.14-4.20) | 2.18 (1.11-4.29) |
| Serious mental illness     | 1.73 (1.11-2.69)                    | 1.65 (1.06-2.56)        | 1.58 (1.01-2.47) | 0.99 (0.55-1.76) | 1.12 (0.66-1.89) | 1.49 (0.93-2.36) |                  |
| Morbidity count            | 0                                   | 1.00                    | 1.00             | 1.00             | 1.00             | 1.00             | 1.00             |
|                            | 1                                   | 1.25 (0.83-1.90)        | 2.15 (1.33-3.47) | 1.09 (0.74-1.63) | 1.22 (0.77-1.95) | 0.77 (0.52-1.14) | 1.67 (1.05-2.64) |
|                            | 2+                                  | 2.87 (1.87-4.41)        | 4.19 (2.53-6.93) | 2.15 (1.39-3.33) | 2.62 (1.64-4.19) | 1.64 (1.09-2.46) | 3.28 (2.03-5.30) |
| Flu vaccine                | 0.85 (0.63-1.16)                    | 1.07 (0.80-1.44)        | 1.32 (0.98-1.78) | 1.03 (0.76-1.39) | 0.94 (0.69-1.27) | 1.07 (0.80-1.43) |                  |
| Number of SARS-CoV-2 tests | 0                                   | 1.00                    | 1.00             | 1.00             | 1.00             | 1.00             | 1.00             |
|                            | 1                                   | 0.89 (0.60-1.33)        | 1.17 (0.82-1.67) | 1.52 (1.09-2.10) | 1.67 (1.19-2.35) | 1.36 (0.97-1.92) | 1.17 (0.82-1.67) |
|                            | 2                                   | 1.68 (1.04-2.71)        | 1.99 (1.29-3.08) | 1.96 (1.24-3.12) | 1.96 (1.21-3.17) | 1.90 (1.19-3.02) | 1.38 (0.81-2.36) |
|                            | 3+                                  | 5.02 (3.73-6.75)        | 4.68 (3.44-6.36) | 4.88 (3.59-6.65) | 6.00 (4.41-8.17) | 3.32 (2.30-4.79) | 5.92 (4.39-7.99) |

\* Estimates correspond to a 1-year increase in age (or age-squared as indicated) within the given age categories.

**Supplementary Table 28:** Covariate hazard ratios for Any SARS-CoV-2 test in the BNT162b2 vs unvaccinated comparison and the 18-64 years and clinically vulnerable subgroup.

| Variable                   | Category       | Weeks since second dose |                  |                  |                  |                  |                  |
|----------------------------|----------------|-------------------------|------------------|------------------|------------------|------------------|------------------|
|                            |                | 3-6                     | 7-10             | 11-14            | 15-18            | 19-22            | 23-26            |
| Age*                       | 18-64          | 1.02 (1.01-1.02)        | 1.02 (1.01-1.02) | 1.01 (1.01-1.02) | 1.01 (1.01-1.02) | 1.03 (1.02-1.03) | 1.03 (1.03-1.04) |
|                            | 18-64 squared  | 1.00 (1.00-1.00)        | 1.00 (1.00-1.00) | 1.00 (1.00-1.00) | 1.00 (1.00-1.00) | 1.00 (1.00-1.00) | 1.00 (1.00-1.00) |
| Sex                        | Female         | 1.00                    | 1.00             | 1.00             | 1.00             | 1.00             | 1.00             |
|                            | Male           | 0.73 (0.72-0.74)        | 0.75 (0.74-0.77) | 0.80 (0.79-0.81) | 0.78 (0.77-0.80) | 0.78 (0.76-0.79) | 0.78 (0.76-0.79) |
| IMD                        | 1              | 1.00                    | 1.00             | 1.00             | 1.00             | 1.00             | 1.00             |
|                            | 2              | 1.11 (1.08-1.13)        | 1.12 (1.09-1.14) | 1.11 (1.08-1.13) | 1.13 (1.10-1.15) | 1.14 (1.12-1.17) | 1.15 (1.12-1.17) |
|                            | 3              | 1.19 (1.16-1.21)        | 1.22 (1.19-1.25) | 1.20 (1.18-1.23) | 1.24 (1.21-1.27) | 1.27 (1.24-1.30) | 1.29 (1.26-1.32) |
|                            | 4              | 1.27 (1.24-1.30)        | 1.30 (1.27-1.33) | 1.27 (1.24-1.30) | 1.32 (1.29-1.35) | 1.37 (1.34-1.40) | 1.40 (1.37-1.43) |
|                            | 5              | 1.37 (1.33-1.40)        | 1.44 (1.41-1.48) | 1.40 (1.37-1.43) | 1.46 (1.43-1.50) | 1.53 (1.49-1.56) | 1.57 (1.54-1.61) |
| Ethnicity                  | White          | 1.00                    | 1.00             | 1.00             | 1.00             | 1.00             | 1.00             |
|                            | Black          | 0.96 (0.92-1.01)        | 0.92 (0.88-0.95) | 0.96 (0.92-1.00) | 0.94 (0.90-0.98) | 0.94 (0.90-0.98) | 0.90 (0.86-0.95) |
|                            | South Asian    | 0.69 (0.66-0.71)        | 0.64 (0.62-0.66) | 0.65 (0.63-0.67) | 0.66 (0.63-0.68) | 0.67 (0.64-0.69) | 0.70 (0.68-0.72) |
|                            | Mixed          | 0.91 (0.86-0.97)        | 0.88 (0.83-0.93) | 0.94 (0.89-1.00) | 0.97 (0.92-1.03) | 0.90 (0.85-0.96) | 0.90 (0.85-0.96) |
|                            | Other          | 0.73 (0.68-0.78)        | 0.71 (0.67-0.75) | 0.78 (0.73-0.83) | 0.78 (0.73-0.83) | 0.81 (0.76-0.86) | 0.76 (0.71-0.81) |
| BMI                        | <30 or missing | 1.00                    | 1.00             | 1.00             | 1.00             | 1.00             | 1.00             |
|                            | 40+            | 0.98 (0.96-1.00)        | 0.96 (0.94-0.99) | 0.98 (0.95-1.00) | 0.95 (0.92-0.97) | 0.96 (0.94-0.98) | 0.97 (0.95-0.99) |
|                            | 30-34.9        | 1.01 (0.99-1.03)        | 1.00 (0.98-1.02) | 1.01 (0.99-1.03) | 0.99 (0.97-1.01) | 1.00 (0.98-1.02) | 1.01 (0.99-1.03) |
|                            | 35-39.9        | 0.98 (0.95-1.01)        | 0.97 (0.95-0.99) | 0.96 (0.93-0.98) | 0.97 (0.95-1.00) | 0.98 (0.96-1.00) | 0.96 (0.93-0.98) |
| Learning disability        |                | 1.08 (1.03-1.12)        | 0.92 (0.88-0.96) | 0.95 (0.91-0.99) | 0.98 (0.94-1.02) | 0.94 (0.90-0.98) | 0.94 (0.90-0.98) |
| Serious mental illness     |                | 0.81 (0.78-0.84)        | 0.77 (0.75-0.80) | 0.80 (0.78-0.83) | 0.77 (0.75-0.80) | 0.74 (0.72-0.77) | 0.77 (0.74-0.80) |
| Morbidity count            | 0              | 1.00                    | 1.00             | 1.00             | 1.00             | 1.00             | 1.00             |
|                            | 1              | 0.98 (0.96-1.01)        | 0.98 (0.96-1.01) | 0.97 (0.95-0.99) | 0.98 (0.96-1.00) | 0.96 (0.94-0.99) | 0.96 (0.94-0.98) |
|                            | 2+             | 0.94 (0.91-0.97)        | 0.92 (0.90-0.95) | 0.92 (0.90-0.95) | 0.92 (0.89-0.94) | 0.92 (0.90-0.94) | 0.91 (0.89-0.93) |
| Flu vaccine                |                | 1.26 (1.24-1.29)        | 1.23 (1.21-1.25) | 1.21 (1.19-1.23) | 1.22 (1.20-1.24) | 1.21 (1.19-1.23) | 1.22 (1.20-1.25) |
| Number of SARS-CoV-2 tests | 0              | 1.00                    | 1.00             | 1.00             | 1.00             | 1.00             | 1.00             |
|                            | 1              | 1.52 (1.49-1.55)        | 1.52 (1.50-1.55) | 1.49 (1.46-1.51) | 1.45 (1.42-1.47) | 1.43 (1.41-1.46) | 1.42 (1.39-1.44) |
|                            | 2              | 1.90 (1.85-1.95)        | 1.84 (1.80-1.89) | 1.82 (1.77-1.87) | 1.79 (1.74-1.84) | 1.71 (1.66-1.75) | 1.70 (1.66-1.75) |
|                            | 3+             | 3.18 (3.11-3.27)        | 2.92 (2.85-2.99) | 2.75 (2.68-2.82) | 2.64 (2.58-2.71) | 2.38 (2.32-2.44) | 2.34 (2.28-2.41) |
| Pregnancy                  |                | 2.00 (1.91-2.09)        | 1.89 (1.81-1.98) | 1.76 (1.67-1.85) | 1.69 (1.60-1.78) | 1.41 (1.32-1.50) | 1.39 (1.30-1.49) |

\* Estimates correspond to a 1-year increase in age (or age-squared as indicated) within the given age categories.

**Supplementary Table 29:** Covariate hazard ratios for COVID-19 hospitalisation in the ChAdOx1 vs unvaccinated comparison and the 18-64 years and clinically vulnerable subgroup.

| Variable                   | Category            | Weeks since second dose |                  |                  |                  |                  |                  |
|----------------------------|---------------------|-------------------------|------------------|------------------|------------------|------------------|------------------|
|                            |                     | 3-6                     | 7-10             | 11-14            | 15-18            | 19-22            | 23-26            |
| Age*                       | 18-64               | 1.13 (1.03-1.24)        | 0.99 (0.94-1.04) | 1.01 (0.97-1.05) | 1.03 (0.99-1.08) | 1.06 (1.01-1.12) | 1.06 (1.02-1.11) |
|                            | 18-64 squared       | 1.00 (1.00-1.00)        | 1.00 (1.00-1.00) | 1.00 (1.00-1.00) | 1.00 (1.00-1.00) | 1.00 (1.00-1.00) | 1.00 (1.00-1.00) |
| Sex                        | Female              | 1.00                    | 1.00             | 1.00             | 1.00             | 1.00             | 1.00             |
|                            | Male                | 0.79 (0.59-1.07)        | 1.04 (0.88-1.22) | 1.00 (0.88-1.15) | 1.08 (0.94-1.23) | 1.16 (1.01-1.34) | 1.14 (1.01-1.30) |
| IMD                        | 1                   | 1.00                    | 1.00             | 1.00             | 1.00             | 1.00             | 1.00             |
|                            | 2 / 3 / 4 / 5       | 0.76 (0.55-1.05)        | -                | -                | -                | -                | -                |
|                            | 2                   | -                       | 1.03 (0.83-1.27) | 1.20 (1.01-1.43) | 0.94 (0.78-1.12) | 0.93 (0.77-1.13) | 1.05 (0.88-1.25) |
|                            | 3                   | -                       | 1.23 (0.98-1.56) | 1.02 (0.83-1.25) | 0.85 (0.69-1.04) | 1.03 (0.83-1.27) | 1.07 (0.88-1.29) |
|                            | 4                   | -                       | 0.83 (0.62-1.11) | 1.01 (0.80-1.27) | 0.94 (0.76-1.16) | 0.93 (0.73-1.17) | 0.83 (0.66-1.03) |
|                            | 5                   | -                       | 0.89 (0.65-1.23) | 1.06 (0.82-1.38) | 0.88 (0.69-1.13) | 0.85 (0.65-1.10) | 0.94 (0.75-1.19) |
| Ethnicity                  | White               | 1.00                    | 1.00             | 1.00             | 1.00             | 1.00             | 1.00             |
|                            | Black               | 1.61 (0.94-2.73)        | 1.33 (0.97-1.80) | 1.55 (1.20-2.00) | 1.33 (1.02-1.74) | 1.41 (1.06-1.86) | 0.79 (0.56-1.11) |
|                            | South Asian         | 2.06 (1.42-2.99)        | 1.24 (0.95-1.61) | 1.63 (1.33-1.99) | 1.31 (1.05-1.64) | 1.31 (1.04-1.66) | 0.99 (0.78-1.27) |
|                            | Mixed / Other       | 0.77 (0.35-1.69)        | 1.24 (0.88-1.75) | -                | -                | -                | -                |
|                            | Mixed               | -                       | -                | 1.11 (0.71-1.74) | 1.40 (0.94-2.10) | 1.66 (1.11-2.48) | 1.29 (0.86-1.95) |
|                            | Other               | -                       | -                | 2.52 (1.86-3.40) | 0.77 (0.46-1.30) | 0.89 (0.52-1.52) | 0.79 (0.48-1.30) |
| BMI                        | <30 or missing      | 1.00                    | 1.00             | 1.00             | 1.00             | 1.00             | 1.00             |
|                            | 40+                 | 1.89 (1.26-2.84)        | 2.67 (2.11-3.39) | 2.31 (1.88-2.83) | 2.98 (2.48-3.58) | 2.92 (2.41-3.54) | 2.86 (2.39-3.42) |
|                            | 30-34.9             | 1.14 (0.73-1.76)        | 1.47 (1.17-1.85) | 1.78 (1.49-2.13) | 1.64 (1.37-1.96) | 1.62 (1.34-1.96) | 1.36 (1.13-1.64) |
|                            | 35-39.9             | 2.04 (1.31-3.16)        | 2.47 (1.92-3.17) | 2.24 (1.81-2.76) | 1.71 (1.36-2.15) | 1.98 (1.58-2.49) | 2.06 (1.69-2.53) |
|                            | Learning disability | -                       | 1.12 (0.69-1.81) | 0.69 (0.42-1.13) | 1.00 (0.66-1.52) | 1.22 (0.80-1.84) | 1.08 (0.72-1.61) |
| Serious mental illness     | -                   | 0.63 (0.42-0.93)        | 0.72 (0.53-0.98) | 0.90 (0.66-1.22) | 0.81 (0.58-1.11) | 0.74 (0.54-1.01) |                  |
| Morbidity count            | 0                   | 1.00                    | 1.00             | 1.00             | 1.00             | 1.00             | 1.00             |
|                            | 1                   | 0.92 (0.63-1.34)        | 1.18 (0.92-1.53) | 1.15 (0.94-1.42) | 1.50 (1.22-1.83) | 1.27 (1.03-1.57) | 1.19 (0.98-1.45) |
|                            | 2+                  | 1.45 (0.89-2.37)        | 1.75 (1.30-2.34) | 1.64 (1.30-2.07) | 2.50 (2.01-3.12) | 1.93 (1.52-2.45) | 1.94 (1.56-2.42) |
| Flu vaccine                |                     | 1.31 (0.96-1.79)        | 1.09 (0.91-1.30) | 1.17 (1.01-1.36) | 1.13 (0.97-1.32) | 1.24 (1.05-1.45) | 1.25 (1.08-1.45) |
| Number of SARS-CoV-2 tests | 0                   | 1.00                    | 1.00             | 1.00             | 1.00             | 1.00             | 1.00             |
|                            | 1                   | 1.15 (0.78-1.70)        | 1.52 (1.23-1.87) | 1.38 (1.16-1.64) | 1.17 (0.97-1.40) | 1.57 (1.31-1.87) | 1.32 (1.11-1.57) |
|                            | 2 / 3+              | 1.35 (0.88-2.08)        | -                | -                | -                | -                | -                |
|                            | 2                   | -                       | 1.62 (1.19-2.21) | 1.48 (1.13-1.92) | 1.64 (1.29-2.09) | 2.08 (1.62-2.66) | 1.35 (1.04-1.76) |
|                            | 3+                  | -                       | 2.16 (1.64-2.86) | 1.96 (1.56-2.48) | 1.98 (1.59-2.47) | 2.38 (1.88-3.01) | 2.57 (2.09-3.17) |

\* Estimates correspond to a 1-year increase in age (or age-squared as indicated) within the given age categories.



**Supplementary Table 30:** Covariate hazard ratios for COVID-19 death in the ChAdOx1 vs unvaccinated comparison and the 18-64 years and clinically vulnerable subgroup.

| Variable                   | Category                            | Weeks since second dose |                  |                  |                  |                  |                   |
|----------------------------|-------------------------------------|-------------------------|------------------|------------------|------------------|------------------|-------------------|
|                            |                                     | 3-6                     | 7-10             | 11-14            | 15-18            | 19-22            | 23-26             |
| Age*                       | 18-64                               | -                       | 1.09 (0.84-1.40) | 1.23 (0.99-1.53) | 1.10 (0.95-1.29) | 1.15 (0.94-1.41) | 1.02 (0.87-1.20)  |
|                            | 18-64 squared                       | -                       | 1.00 (1.00-1.00) | 1.00 (1.00-1.00) | 1.00 (1.00-1.00) | 1.00 (1.00-1.00) | 1.00 (1.00-1.00)  |
| Sex                        | Female                              | -                       | 1.00             | 1.00             | 1.00             | 1.00             | 1.00              |
|                            | Male                                | -                       | 1.27 (0.62-2.60) | 2.82 (1.71-4.67) | 1.15 (0.77-1.74) | 1.84 (1.22-2.79) | 1.94 (1.23-3.06)  |
| IMD                        | 1                                   | -                       | 1.00             | 1.00             | 1.00             | 1.00             | 1.00              |
|                            | 2 / 3 / 4 / 5                       | -                       | 0.63 (0.29-1.39) | -                | -                | -                | -                 |
|                            | 2                                   | -                       | -                | 0.62 (0.33-1.17) | 1.15 (0.71-1.88) | 0.95 (0.54-1.70) | 1.50 (0.81-2.78)  |
|                            | 3 / 4 / 5                           | -                       | -                | 0.64 (0.37-1.11) | -                | -                | -                 |
|                            | 3                                   | -                       | -                | -                | 0.89 (0.48-1.66) | 1.36 (0.79-2.33) | 1.86 (0.97-3.56)  |
|                            | 4 / 5                               | -                       | -                | -                | 0.69 (0.37-1.26) | -                | -                 |
|                            | 4                                   | -                       | -                | -                | -                | 0.80 (0.39-1.64) | 1.17 (0.54-2.51)  |
| Ethnicity                  | White                               | -                       | 1.00             | 1.00             | 1.00             | 1.00             | 1.00              |
|                            | Black / South Asian / Mixed / Other | -                       | 0.63 (0.22-1.79) | 1.51 (0.89-2.57) | 0.98 (0.57-1.70) | -                | 1.06 (0.55-2.03)  |
|                            | Black                               | -                       | -                | -                | -                | 1.66 (0.77-3.59) | -                 |
|                            | South Asian / Mixed / Other         | -                       | -                | -                | -                | 1.74 (1.00-3.05) | -                 |
| BMI                        | <30 or missing                      | -                       | 1.00             | 1.00             | 1.00             | 1.00             | 1.00              |
|                            | 40+ / 30-34.9 / 35-39.9             | -                       | 1.80 (0.81-4.01) | -                | -                | -                | -                 |
|                            | 40+                                 | -                       | -                | 3.27 (1.71-6.24) | 4.87 (2.94-8.08) | 4.90 (2.91-8.25) | 5.67 (3.19-10.09) |
|                            | 30-34.9                             | -                       | -                | 1.24 (0.66-2.34) | -                | 1.65 (0.95-2.88) | 2.29 (1.29-4.04)  |
|                            | 35-39.9                             | -                       | -                | 2.70 (1.42-5.15) | -                | 2.07 (1.05-4.10) | 2.52 (1.26-5.06)  |
|                            | 30-34.9 / 35-39.9                   | -                       | -                | -                | 1.83 (1.13-2.96) | -                | -                 |
| Serious mental illness     | -                                   | -                       | -                | -                | -                | 1.97 (0.92-4.22) |                   |
| Morbidity count            | 0                                   | -                       | 1.00             | 1.00             | 1.00             | 1.00             | 1.00              |
|                            | 1 / 2+                              | -                       | 0.73 (0.29-1.85) | 2.51 (1.11-5.67) | 1.64 (0.93-2.87) | 1.41 (0.83-2.42) | -                 |
|                            | 1                                   | -                       | -                | -                | -                | -                | 1.48 (0.75-2.91)  |
| Flu vaccine                | 2+                                  | -                       | -                | -                | -                | -                | 2.21 (1.04-4.66)  |
|                            | -                                   | -                       | -                | -                | -                | -                | -                 |
| Number of SARS-CoV-2 tests | -                                   | -                       | -                | 1.29 (0.78-2.11) | 0.95 (0.62-1.44) | 1.33 (0.86-2.06) | 1.27 (0.81-1.98)  |
|                            | 0                                   | -                       | 1.00             | 1.00             | 1.00             | 1.00             | 1.00              |
|                            | 1 / 2 / 3+                          | -                       | 1.33 (0.61-2.91) | 1.00 (0.59-1.69) | -                | -                | 1.58 (1.00-2.49)  |
|                            | 1                                   | -                       | -                | -                | 0.88 (0.47-1.65) | 0.94 (0.51-1.75) | -                 |
| Flu vaccine                | 2 / 3+                              | -                       | -                | -                | 1.50 (0.85-2.66) | 2.03 (1.22-3.40) | -                 |
|                            | -                                   | -                       | -                | -                | -                | -                | -                 |

\* Estimates correspond to a 1-year increase in age (or age-squared as indicated) within the given age categories.

**Supplementary Table 31:** Covariate hazard ratios for Positive SARS-CoV-2 test in the ChAdOx1 vs unvaccinated comparison and the 18-64 years and clinically vulnerable subgroup.

| Variable                   | Category       | Weeks since second dose |                  |                  |                  |                  |                  |
|----------------------------|----------------|-------------------------|------------------|------------------|------------------|------------------|------------------|
|                            |                | 3-6                     | 7-10             | 11-14            | 15-18            | 19-22            | 23-26            |
| Age*                       | 18-64          | 0.97 (0.95-0.99)        | 0.97 (0.96-0.98) | 0.97 (0.96-0.98) | 1.04 (1.03-1.05) | 1.10 (1.09-1.11) | 1.10 (1.09-1.11) |
|                            | 18-64 squared  | 1.00 (1.00-1.00)        | 1.00 (1.00-1.00) | 1.00 (1.00-1.00) | 1.00 (1.00-1.00) | 1.00 (1.00-1.00) | 1.00 (1.00-1.00) |
| Sex                        | Female         | 1.00                    | 1.00             | 1.00             | 1.00             | 1.00             | 1.00             |
|                            | Male           | 0.91 (0.84-0.98)        | 0.97 (0.93-1.01) | 0.94 (0.91-0.98) | 0.86 (0.83-0.90) | 0.84 (0.81-0.87) | 0.84 (0.82-0.87) |
| IMD                        | 1              | 1.00                    | 1.00             | 1.00             | 1.00             | 1.00             | 1.00             |
|                            | 2              | 1.06 (0.96-1.18)        | 1.02 (0.96-1.08) | 1.04 (0.98-1.09) | 1.08 (1.02-1.14) | 1.10 (1.05-1.16) | 1.14 (1.09-1.20) |
|                            | 3              | 1.15 (1.03-1.29)        | 1.08 (1.01-1.15) | 1.03 (0.97-1.09) | 1.03 (0.97-1.09) | 1.16 (1.09-1.22) | 1.21 (1.15-1.27) |
|                            | 4              | 1.14 (1.01-1.28)        | 1.04 (0.97-1.12) | 1.05 (0.99-1.11) | 1.06 (1.00-1.13) | 1.20 (1.13-1.27) | 1.23 (1.17-1.30) |
|                            | 5              | 1.28 (1.13-1.45)        | 1.17 (1.09-1.25) | 1.00 (0.94-1.07) | 1.05 (0.98-1.12) | 1.25 (1.18-1.33) | 1.27 (1.20-1.33) |
| Ethnicity                  | White          | 1.00                    | 1.00             | 1.00             | 1.00             | 1.00             | 1.00             |
|                            | Black          | 1.05 (0.87-1.27)        | 0.96 (0.85-1.07) | 1.03 (0.93-1.13) | 0.93 (0.83-1.03) | 0.85 (0.76-0.95) | 0.65 (0.58-0.73) |
|                            | South Asian    | 1.17 (1.04-1.31)        | 0.77 (0.71-0.83) | 0.92 (0.86-0.98) | 0.86 (0.80-0.93) | 0.84 (0.79-0.91) | 0.79 (0.74-0.85) |
|                            | Mixed          | 1.22 (0.96-1.55)        | 1.04 (0.89-1.21) | 0.89 (0.77-1.03) | 1.05 (0.92-1.21) | 0.99 (0.86-1.14) | 0.87 (0.76-1.00) |
|                            | Other          | 0.87 (0.67-1.14)        | 0.56 (0.46-0.68) | 0.81 (0.70-0.94) | 0.60 (0.51-0.72) | 0.68 (0.58-0.80) | 0.75 (0.66-0.86) |
| BMI                        | <30 or missing | 1.00                    | 1.00             | 1.00             | 1.00             | 1.00             | 1.00             |
|                            | 40+            | 0.95 (0.84-1.08)        | 0.99 (0.92-1.07) | 1.12 (1.06-1.19) | 1.18 (1.11-1.25) | 1.16 (1.10-1.23) | 1.15 (1.10-1.21) |
|                            | 30-34.9        | 1.09 (0.98-1.22)        | 1.17 (1.10-1.24) | 1.14 (1.08-1.20) | 1.15 (1.09-1.21) | 1.14 (1.09-1.20) | 1.17 (1.12-1.22) |
|                            | 35-39.9        | 1.23 (1.08-1.41)        | 1.18 (1.09-1.27) | 1.14 (1.07-1.22) | 1.24 (1.16-1.32) | 1.22 (1.15-1.30) | 1.19 (1.13-1.26) |
| Learning disability        |                | 0.38 (0.29-0.50)        | 0.38 (0.32-0.44) | 0.47 (0.41-0.54) | 0.53 (0.46-0.60) | 0.58 (0.51-0.66) | 0.63 (0.57-0.70) |
| Serious mental illness     |                | 0.51 (0.42-0.61)        | 0.55 (0.49-0.61) | 0.58 (0.53-0.64) | 0.56 (0.51-0.62) | 0.50 (0.45-0.55) | 0.51 (0.46-0.55) |
| Morbidity count            | 0              | 1.00                    | 1.00             | 1.00             | 1.00             | 1.00             | 1.00             |
|                            | 1              | 0.92 (0.81-1.03)        | 0.97 (0.91-1.04) | 0.95 (0.90-1.01) | 0.99 (0.93-1.04) | 0.96 (0.91-1.01) | 0.94 (0.90-0.99) |
|                            | 2+             | 0.81 (0.68-0.96)        | 0.89 (0.82-0.98) | 0.94 (0.87-1.01) | 0.97 (0.91-1.05) | 0.88 (0.82-0.94) | 0.85 (0.80-0.91) |
| Flu vaccine                |                | 0.99 (0.91-1.07)        | 0.96 (0.92-1.01) | 0.99 (0.95-1.04) | 1.05 (1.00-1.09) | 1.08 (1.04-1.12) | 1.05 (1.01-1.09) |
| Number of SARS-CoV-2 tests | 0              | 1.00                    | 1.00             | 1.00             | 1.00             | 1.00             | 1.00             |
|                            | 1              | 1.53 (1.40-1.68)        | 1.60 (1.52-1.69) | 1.43 (1.37-1.50) | 1.39 (1.33-1.46) | 1.31 (1.25-1.37) | 1.33 (1.28-1.39) |
|                            | 2              | 1.76 (1.54-2.01)        | 1.54 (1.42-1.66) | 1.53 (1.43-1.64) | 1.47 (1.38-1.58) | 1.48 (1.39-1.58) | 1.38 (1.30-1.47) |
|                            | 3+             | 1.81 (1.57-2.09)        | 1.73 (1.59-1.88) | 1.60 (1.49-1.72) | 1.66 (1.55-1.78) | 1.50 (1.40-1.62) | 1.48 (1.38-1.57) |
| Pregnancy                  |                | 0.87 (0.70-1.09)        | 0.89 (0.77-1.03) | 1.03 (0.90-1.17) | 1.09 (0.95-1.27) | 1.09 (0.93-1.27) | 1.19 (1.03-1.38) |

\* Estimates correspond to a 1-year increase in age (or age-squared as indicated) within the given age categories.

**Supplementary Table 32:** Covariate hazard ratios for Non-COVID-19 death in the ChAdOx1 vs unvaccinated comparison and the 18-64 years and clinically vulnerable subgroup.

| Variable                   | Category                            | Weeks since second dose |                  |                  |                  |                  |                  |
|----------------------------|-------------------------------------|-------------------------|------------------|------------------|------------------|------------------|------------------|
|                            |                                     | 3-6                     | 7-10             | 11-14            | 15-18            | 19-22            | 23-26            |
| Age*                       | 18-64                               | 1.15 (1.04-1.28)        | 1.03 (0.93-1.13) | 1.17 (1.05-1.30) | 1.20 (1.05-1.37) | 1.13 (1.03-1.25) | 1.10 (1.01-1.21) |
|                            | 18-64 squared                       | 1.00 (1.00-1.00)        | 1.00 (1.00-1.00) | 1.00 (1.00-1.00) | 1.00 (1.00-1.00) | 1.00 (1.00-1.00) | 1.00 (1.00-1.00) |
| Sex                        | Female                              | 1.00                    | 1.00             | 1.00             | 1.00             | 1.00             | 1.00             |
|                            | Male                                | 1.78 (1.41-2.25)        | 1.28 (1.05-1.57) | 1.45 (1.19-1.77) | 1.38 (1.13-1.68) | 1.65 (1.35-2.03) | 1.43 (1.17-1.76) |
| IMD                        | 1                                   | 1.00                    | 1.00             | 1.00             | 1.00             | 1.00             | 1.00             |
|                            | 2                                   | 1.10 (0.82-1.47)        | 0.82 (0.62-1.08) | 0.93 (0.70-1.22) | 0.83 (0.64-1.09) | 0.83 (0.63-1.10) | 0.82 (0.63-1.07) |
|                            | 3                                   | 0.84 (0.60-1.18)        | 0.71 (0.53-0.96) | 0.92 (0.69-1.24) | 0.80 (0.60-1.07) | 0.84 (0.62-1.12) | 0.63 (0.47-0.85) |
|                            | 4                                   | 0.72 (0.50-1.05)        | 0.69 (0.50-0.95) | 0.87 (0.63-1.19) | 0.60 (0.43-0.84) | 0.61 (0.43-0.86) | -                |
|                            | 5                                   | 0.70 (0.47-1.07)        | 0.71 (0.51-0.99) | 0.77 (0.55-1.09) | 0.62 (0.44-0.87) | 0.81 (0.58-1.13) | -                |
|                            | 4 / 5                               | -                       | -                | -                | -                | -                | 0.56 (0.42-0.73) |
| Ethnicity                  | White                               | 1.00                    | 1.00             | 1.00             | 1.00             | 1.00             | 1.00             |
|                            | Black / South Asian / Mixed / Other | 0.48 (0.32-0.71)        | 0.51 (0.36-0.72) | -                | 0.61 (0.42-0.88) | -                | 0.63 (0.44-0.91) |
|                            | Black                               | -                       | -                | 0.44 (0.22-0.87) | -                | 1.00 (0.60-1.67) | -                |
|                            | South Asian / Mixed / Other         | -                       | -                | 0.64 (0.44-0.94) | -                | 0.54 (0.36-0.83) | -                |
| BMI                        | <30 or missing                      | 1.00                    | 1.00             | 1.00             | 1.00             | 1.00             | 1.00             |
|                            | 40+                                 | 1.01 (0.69-1.48)        | 0.77 (0.53-1.12) | 0.80 (0.56-1.14) | 0.82 (0.58-1.17) | 0.84 (0.59-1.18) | 0.85 (0.60-1.19) |
|                            | 30-34.9                             | 0.89 (0.67-1.19)        | 0.79 (0.60-1.04) | 0.78 (0.60-1.02) | 0.60 (0.45-0.80) | 0.67 (0.50-0.89) | 0.74 (0.56-0.96) |
|                            | 35-39.9                             | 0.59 (0.37-0.93)        | 0.85 (0.60-1.20) | 0.72 (0.50-1.04) | 0.72 (0.51-1.04) | 0.89 (0.64-1.25) | 0.55 (0.37-0.82) |
|                            | Learning disability                 | 0.93 (0.44-1.96)        | -                | 1.38 (0.77-2.46) | -                | 1.04 (0.53-2.03) | 1.54 (0.88-2.72) |
| Serious mental illness     | 1.83 (1.23-2.75)                    | 1.76 (1.22-2.55)        | 1.41 (0.95-2.09) | 1.34 (0.89-2.02) | 1.17 (0.76-1.79) | 1.42 (0.95-2.12) |                  |
| Morbidity count            | 0                                   | 1.00                    | 1.00             | 1.00             | 1.00             | 1.00             | 1.00             |
|                            | 1                                   | 1.28 (0.86-1.90)        | 1.49 (1.03-2.14) | 1.41 (1.01-1.96) | 1.18 (0.84-1.65) | 0.79 (0.58-1.09) | 1.15 (0.83-1.61) |
|                            | 2+                                  | 2.77 (1.83-4.19)        | 3.16 (2.17-4.61) | 2.03 (1.43-2.88) | 2.29 (1.63-3.24) | 1.67 (1.20-2.32) | 2.11 (1.49-2.98) |
| Flu vaccine                | 0.98 (0.75-1.28)                    | 1.06 (0.83-1.36)        | 1.05 (0.82-1.36) | 0.81 (0.63-1.03) | 1.02 (0.80-1.31) | 1.00 (0.78-1.28) |                  |
| Number of SARS-CoV-2 tests | 0                                   | 1.00                    | 1.00             | 1.00             | 1.00             | 1.00             | 1.00             |
|                            | 1                                   | 1.09 (0.78-1.51)        | 1.14 (0.85-1.52) | 1.44 (1.10-1.89) | 1.02 (0.76-1.38) | 0.94 (0.69-1.27) | 0.98 (0.73-1.33) |
|                            | 2                                   | 1.82 (1.19-2.78)        | 1.73 (1.19-2.52) | 1.78 (1.21-2.62) | 1.70 (1.17-2.48) | 2.24 (1.60-3.12) | 1.25 (0.82-1.93) |
|                            | 3+                                  | 5.21 (3.97-6.84)        | 4.26 (3.30-5.49) | 5.28 (4.12-6.76) | 4.96 (3.87-6.36) | 4.15 (3.20-5.38) | 5.08 (3.96-6.51) |

\* Estimates correspond to a 1-year increase in age (or age-squared as indicated) within the given age categories.

**Supplementary Table 33:** Covariate hazard ratios for Any SARS-CoV-2 test in the ChAdOx1 vs unvaccinated comparison and the 18-64 years and clinically vulnerable subgroup.

| Variable                   | Category       | Weeks since second dose |                  |                  |                  |                  |                  |
|----------------------------|----------------|-------------------------|------------------|------------------|------------------|------------------|------------------|
|                            |                | 3-6                     | 7-10             | 11-14            | 15-18            | 19-22            | 23-26            |
| Age*                       | 18-64          | 1.02 (1.02-1.03)        | 1.02 (1.02-1.03) | 1.01 (1.01-1.01) | 1.02 (1.02-1.03) | 1.04 (1.04-1.04) | 1.04 (1.04-1.05) |
|                            | 18-64 squared  | 1.00 (1.00-1.00)        | 1.00 (1.00-1.00) | 1.00 (1.00-1.00) | 1.00 (1.00-1.00) | 1.00 (1.00-1.00) | 1.00 (1.00-1.00) |
| Sex                        | Female         | 1.00                    | 1.00             | 1.00             | 1.00             | 1.00             | 1.00             |
|                            | Male           | 0.72 (0.71-0.73)        | 0.76 (0.75-0.77) | 0.81 (0.80-0.82) | 0.78 (0.77-0.79) | 0.77 (0.76-0.78) | 0.77 (0.76-0.78) |
| IMD                        | 1              | 1.00                    | 1.00             | 1.00             | 1.00             | 1.00             | 1.00             |
|                            | 2              | 1.14 (1.11-1.16)        | 1.12 (1.10-1.14) | 1.12 (1.10-1.15) | 1.13 (1.11-1.15) | 1.14 (1.12-1.16) | 1.16 (1.14-1.18) |
|                            | 3              | 1.22 (1.20-1.25)        | 1.22 (1.20-1.24) | 1.21 (1.18-1.23) | 1.22 (1.20-1.24) | 1.24 (1.22-1.27) | 1.27 (1.24-1.29) |
|                            | 4              | 1.30 (1.28-1.33)        | 1.30 (1.28-1.33) | 1.29 (1.26-1.31) | 1.32 (1.29-1.34) | 1.37 (1.35-1.40) | 1.37 (1.35-1.40) |
|                            | 5              | 1.43 (1.40-1.46)        | 1.45 (1.42-1.47) | 1.40 (1.37-1.42) | 1.44 (1.42-1.47) | 1.53 (1.50-1.56) | 1.54 (1.51-1.57) |
| Ethnicity                  | White          | 1.00                    | 1.00             | 1.00             | 1.00             | 1.00             | 1.00             |
|                            | Black          | 0.92 (0.89-0.95)        | 0.86 (0.83-0.89) | 0.94 (0.90-0.97) | 0.94 (0.91-0.98) | 0.90 (0.86-0.93) | 0.87 (0.84-0.90) |
|                            | South Asian    | 0.64 (0.62-0.65)        | 0.59 (0.57-0.60) | 0.62 (0.61-0.64) | 0.62 (0.60-0.64) | 0.66 (0.64-0.68) | 0.67 (0.65-0.68) |
|                            | Mixed          | 0.93 (0.88-0.98)        | 0.87 (0.83-0.91) | 0.90 (0.86-0.95) | 0.92 (0.88-0.97) | 0.91 (0.87-0.96) | 0.90 (0.86-0.95) |
|                            | Other          | 0.72 (0.69-0.76)        | 0.70 (0.66-0.73) | 0.75 (0.71-0.78) | 0.76 (0.72-0.80) | 0.75 (0.72-0.79) | 0.76 (0.73-0.80) |
| BMI                        | <30 or missing | 1.00                    | 1.00             | 1.00             | 1.00             | 1.00             | 1.00             |
|                            | 40+            | 0.94 (0.92-0.96)        | 0.95 (0.93-0.97) | 0.95 (0.93-0.97) | 0.95 (0.93-0.97) | 0.95 (0.93-0.97) | 0.95 (0.93-0.96) |
|                            | 30-34.9        | 0.99 (0.97-1.01)        | 1.00 (0.99-1.02) | 0.99 (0.97-1.00) | 0.98 (0.97-1.00) | 1.00 (0.98-1.01) | 0.99 (0.98-1.01) |
|                            | 35-39.9        | 0.98 (0.95-1.00)        | 1.00 (0.98-1.02) | 0.96 (0.94-0.98) | 0.97 (0.95-0.99) | 0.98 (0.96-1.00) | 0.98 (0.96-0.99) |
| Learning disability        |                | 1.02 (0.98-1.05)        | 0.92 (0.89-0.95) | 0.97 (0.94-1.00) | 1.02 (0.99-1.05) | 0.95 (0.92-0.98) | 1.00 (0.97-1.03) |
| Serious mental illness     |                | 0.77 (0.75-0.79)        | 0.75 (0.73-0.77) | 0.79 (0.76-0.81) | 0.76 (0.74-0.79) | 0.75 (0.73-0.77) | 0.74 (0.72-0.76) |
| Morbidity count            | 0              | 1.00                    | 1.00             | 1.00             | 1.00             | 1.00             | 1.00             |
|                            | 1              | 0.96 (0.94-0.98)        | 0.96 (0.94-0.97) | 0.96 (0.94-0.98) | 0.99 (0.97-1.01) | 0.97 (0.95-0.99) | 0.96 (0.95-0.98) |
|                            | 2+             | 0.90 (0.88-0.92)        | 0.89 (0.87-0.91) | 0.90 (0.88-0.92) | 0.92 (0.91-0.94) | 0.89 (0.87-0.91) | 0.89 (0.87-0.91) |
| Flu vaccine                |                | 1.24 (1.22-1.25)        | 1.21 (1.19-1.22) | 1.19 (1.17-1.21) | 1.18 (1.17-1.20) | 1.18 (1.17-1.20) | 1.20 (1.19-1.22) |
| Number of SARS-CoV-2 tests | 0              | 1.00                    | 1.00             | 1.00             | 1.00             | 1.00             | 1.00             |
|                            | 1              | 1.48 (1.46-1.50)        | 1.49 (1.47-1.51) | 1.45 (1.42-1.47) | 1.41 (1.39-1.43) | 1.40 (1.39-1.42) | 1.38 (1.36-1.40) |
|                            | 2              | 1.82 (1.78-1.85)        | 1.78 (1.75-1.82) | 1.72 (1.69-1.76) | 1.71 (1.67-1.74) | 1.68 (1.64-1.71) | 1.66 (1.62-1.69) |
|                            | 3+             | 3.05 (2.99-3.11)        | 2.83 (2.78-2.89) | 2.70 (2.65-2.75) | 2.61 (2.56-2.66) | 2.42 (2.38-2.47) | 2.36 (2.31-2.40) |
| Pregnancy                  |                | 1.74 (1.67-1.82)        | 1.66 (1.59-1.74) | 1.57 (1.49-1.64) | 1.47 (1.40-1.55) | 1.23 (1.16-1.30) | 1.23 (1.16-1.31) |

\* Estimates correspond to a 1-year increase in age (or age-squared as indicated) within the given age categories.

**Supplementary Table 34:** Covariate hazard ratios for COVID-19 hospitalisation in the BNT162b2 vs ChAdOx1 comparison and the 18-64 years and clinically vulnerable subgroup.

| Variable                   | Category                            | Weeks since second dose |                  |                  |                  |                  |                  |
|----------------------------|-------------------------------------|-------------------------|------------------|------------------|------------------|------------------|------------------|
|                            |                                     | 3-6                     | 7-10             | 11-14            | 15-18            | 19-22            | 23-26            |
| Age*                       | 18-64                               | 1.11 (0.87-1.40)        | 0.96 (0.86-1.07) | 0.99 (0.92-1.06) | 1.08 (1.00-1.15) | 1.04 (0.97-1.11) | 1.09 (1.02-1.15) |
|                            | 18-64 squared                       | 1.00 (1.00-1.00)        | 1.00 (1.00-1.00) | 1.00 (1.00-1.00) | 1.00 (1.00-1.00) | 1.00 (1.00-1.00) | 1.00 (1.00-1.00) |
| Sex                        | Female                              | -                       | 1.00             | 1.00             | 1.00             | 1.00             | 1.00             |
|                            | Male                                | -                       | 1.38 (1.03-1.86) | 1.26 (1.02-1.56) | 1.20 (1.01-1.43) | 1.15 (0.96-1.37) | 1.34 (1.14-1.58) |
| IMD                        | 1                                   | 1.00                    | 1.00             | 1.00             | 1.00             | 1.00             | 1.00             |
|                            | 2 / 3 / 4 / 5                       | 0.56 (0.26-1.21)        | -                | -                | -                | -                | -                |
|                            | 2                                   | -                       | 1.13 (0.76-1.67) | 1.03 (0.76-1.39) | 0.94 (0.72-1.22) | 0.67 (0.51-0.88) | 0.96 (0.76-1.20) |
|                            | 3                                   | -                       | 0.98 (0.64-1.52) | 0.77 (0.55-1.08) | 0.90 (0.68-1.17) | 0.86 (0.66-1.13) | 0.85 (0.67-1.08) |
|                            | 4 / 5                               | -                       | 0.84 (0.56-1.25) | -                | -                | -                | -                |
|                            | 4                                   | -                       | -                | 0.98 (0.71-1.35) | 1.05 (0.80-1.38) | 0.65 (0.48-0.87) | 0.78 (0.61-1.01) |
| Ethnicity                  | 5                                   | -                       | -                | 1.07 (0.76-1.50) | 0.84 (0.62-1.15) | 0.76 (0.57-1.03) | 0.87 (0.67-1.12) |
|                            | White                               | 1.00                    | 1.00             | 1.00             | 1.00             | 1.00             | 1.00             |
|                            | Black / South Asian / Mixed / Other | 1.76 (0.62-5.03)        | -                | 1.79 (1.30-2.46) | 1.37 (1.03-1.83) | -                | 0.92 (0.68-1.24) |
|                            | Black                               | -                       | 0.97 (0.30-3.14) | -                | -                | 0.84 (0.40-1.78) | -                |
| BMI                        | South Asian / Mixed / Other         | -                       | 1.22 (0.71-2.08) | -                | -                | 1.15 (0.83-1.59) | -                |
|                            | <30 or missing                      | 1.00                    | 1.00             | 1.00             | 1.00             | 1.00             | 1.00             |
|                            | 40+ / 30-34.9 / 35-39.9             | 1.26 (0.63-2.54)        | -                | -                | -                | -                | -                |
|                            | 40+                                 | -                       | 1.95 (1.28-2.96) | 2.44 (1.82-3.28) | 2.33 (1.84-2.96) | 2.35 (1.85-2.99) | 2.34 (1.88-2.92) |
|                            | 30-34.9                             | -                       | 1.23 (0.83-1.82) | 1.34 (1.01-1.79) | 1.23 (0.97-1.55) | 1.32 (1.04-1.68) | 1.24 (1.00-1.54) |
|                            | 35-39.9                             | -                       | 1.89 (1.23-2.92) | 2.22 (1.64-3.00) | 1.50 (1.14-1.99) | 1.26 (0.93-1.71) | 1.74 (1.37-2.21) |
| Learning disability        | -                                   | -                       | -                | -                | -                | 1.11 (0.70-1.75) |                  |
| Serious mental illness     | -                                   | 1.60 (0.88-2.91)        | 0.96 (0.53-1.71) | -                | 1.05 (0.65-1.69) | 1.00 (0.66-1.52) |                  |
| Morbidity count            | 0                                   | 1.00                    | 1.00             | 1.00             | 1.00             | 1.00             | 1.00             |
|                            | 1 / 2+                              | 1.59 (0.59-4.31)        | -                | 1.81 (1.29-2.53) | -                | -                | -                |
|                            | 1                                   | -                       | 1.48 (0.89-2.44) | -                | 1.64 (1.22-2.20) | 1.57 (1.16-2.13) | 1.38 (1.06-1.81) |
| Flu vaccine                | 2+                                  | -                       | 3.25 (1.92-5.51) | -                | 3.13 (2.30-4.24) | 2.86 (2.07-3.95) | 2.48 (1.87-3.28) |
|                            | -                                   | -                       | 1.21 (0.84-1.73) | 1.27 (0.96-1.66) | 1.12 (0.89-1.42) | 1.43 (1.11-1.85) | 1.48 (1.18-1.85) |
| Number of SARS-CoV-2 tests | 0                                   | 1.00                    | 1.00             | 1.00             | 1.00             | 1.00             | 1.00             |
|                            | 1 / 2 / 3+                          | 1.26 (0.59-2.66)        | -                | -                | -                | -                | -                |
|                            | 1                                   | -                       | 1.08 (0.72-1.61) | 1.70 (1.32-2.18) | 1.30 (1.03-1.63) | 1.56 (1.25-1.95) | 1.25 (1.02-1.53) |
|                            | 2                                   | -                       | 1.86 (1.13-3.06) | 1.66 (1.13-2.42) | 1.90 (1.41-2.54) | 1.99 (1.47-2.69) | 1.35 (1.00-1.83) |
|                            | 3+                                  | -                       | 3.64 (2.41-5.48) | 2.66 (1.90-3.71) | 2.62 (2.02-3.42) | 2.99 (2.28-3.93) | 2.72 (2.14-3.46) |

\* Estimates correspond to a 1-year increase in age (or age-squared as indicated) within the given age categories.

**Supplementary Table 35:** Covariate hazard ratios for COVID-19 death in the BNT162b2 vs ChAdOx1 comparison and the 18-64 years and clinically vulnerable subgroup.

| Variable                   | Category                            | Weeks since second dose |      |       |                  |                    |                   |
|----------------------------|-------------------------------------|-------------------------|------|-------|------------------|--------------------|-------------------|
|                            |                                     | 3-6                     | 7-10 | 11-14 | 15-18            | 19-22              | 23-26             |
| Age*                       | 18-64                               | -                       | -    | -     | 1.10 (0.83-1.46) | 1.05 (0.79-1.39)   | 0.98 (0.78-1.24)  |
|                            | 18-64 squared                       | -                       | -    | -     | 1.00 (1.00-1.00) | 1.00 (1.00-1.00)   | 1.00 (1.00-1.00)  |
| Sex                        | Female                              | -                       | -    | -     | -                | 1.00               | 1.00              |
|                            | Male                                | -                       | -    | -     | -                | 1.46 (0.84-2.55)   | 1.36 (0.78-2.35)  |
| IMD                        | 1                                   | -                       | -    | -     | 1.00             | 1.00               | 1.00              |
|                            | 2 / 3 / 4 / 5                       | -                       | -    | -     | 1.15 (0.56-2.35) | 0.92 (0.47-1.79)   | -                 |
|                            | 2                                   | -                       | -    | -     | -                | -                  | 1.01 (0.44-2.31)  |
|                            | 3 / 4 / 5                           | -                       | -    | -     | -                | -                  | 1.32 (0.64-2.73)  |
| Ethnicity                  | White                               | -                       | -    | -     | 1.00             | 1.00               | 1.00              |
|                            | Black / South Asian / Mixed / Other | -                       | -    | -     | 0.23 (0.03-1.91) | -                  | -                 |
|                            | Black                               | -                       | -    | -     | -                | 0.00 (0.00-0.00)   | 0.00 (0.00-0.00)  |
|                            | South Asian                         | -                       | -    | -     | -                | 5.21 (2.28-11.90)  | -                 |
|                            | Mixed                               | -                       | -    | -     | -                | 0.00 (0.00-0.00)   | -                 |
|                            | Other                               | -                       | -    | -     | -                | 0.00 (0.00-0.00)   | -                 |
| BMI                        | South Asian / Mixed / Other         | -                       | -    | -     | -                | -                  | 2.38 (0.95-5.95)  |
|                            | <30 or missing                      | -                       | -    | -     | 1.00             | 1.00               | 1.00              |
|                            | 40+ / 30-34.9 / 35-39.9             | -                       | -    | -     | 3.66 (1.81-7.40) | 1.31 (0.73-2.34)   | -                 |
|                            | 40+                                 | -                       | -    | -     | -                | -                  | 4.97 (2.45-10.09) |
| Morbidity count            | 30-34.9 / 35-39.9                   | -                       | -    | -     | -                | -                  | 1.92 (1.01-3.64)  |
|                            | 0                                   | -                       | -    | -     | 1.00             | 1.00               | 1.00              |
|                            | 1 / 2+                              | -                       | -    | -     | 2.29 (0.70-7.43) | 10.54 (1.48-75.10) | -                 |
|                            | 1                                   | -                       | -    | -     | -                | -                  | 2.23 (0.75-6.62)  |
| Number of SARS-CoV-2 tests | 2+                                  | -                       | -    | -     | -                | -                  | 4.49 (1.47-13.73) |
|                            | 0                                   | -                       | -    | -     | 1.00             | 1.00               | 1.00              |
|                            | 1 / 2 / 3+                          | -                       | -    | -     | 1.59 (0.81-3.11) | -                  | 2.07 (1.21-3.54)  |
|                            | 1                                   | -                       | -    | -     | -                | 1.25 (0.56-2.81)   | -                 |
|                            | 2 / 3+                              | -                       | -    | -     | -                | 3.65 (1.92-6.92)   | -                 |

\* Estimates correspond to a 1-year increase in age (or age-squared as indicated) within the given age categories.

**Supplementary Table 36:** Covariate hazard ratios for Positive SARS-CoV-2 test in the BNT162b2 vs ChAdOx1 comparison and the 18-64 years and clinically vulnerable subgroup.

| Variable                   | Category                            | Weeks since second dose |                  |                  |                  |                  |                  |
|----------------------------|-------------------------------------|-------------------------|------------------|------------------|------------------|------------------|------------------|
|                            |                                     | 3-6                     | 7-10             | 11-14            | 15-18            | 19-22            | 23-26            |
| Age*                       | 18-64                               | 0.99 (0.96-1.02)        | 0.99 (0.97-1.00) | 0.99 (0.97-1.00) | 1.05 (1.04-1.06) | 1.11 (1.10-1.13) | 1.11 (1.10-1.12) |
|                            | 18-64 squared                       | 1.00 (1.00-1.00)        | 1.00 (1.00-1.00) | 1.00 (1.00-1.00) | 1.00 (1.00-1.00) | 1.00 (1.00-1.00) | 1.00 (1.00-1.00) |
| Sex                        | Female                              | 1.00                    | 1.00             | 1.00             | 1.00             | 1.00             | 1.00             |
|                            | Male                                | 0.93 (0.84-1.03)        | 1.04 (0.99-1.10) | 1.01 (0.97-1.05) | 0.93 (0.90-0.97) | 0.87 (0.84-0.90) | 0.90 (0.87-0.93) |
| IMD                        | 1                                   | 1.00                    | 1.00             | 1.00             | 1.00             | 1.00             | 1.00             |
|                            | 2                                   | 1.17 (1.00-1.35)        | 0.98 (0.91-1.05) | 1.03 (0.97-1.09) | 1.00 (0.95-1.06) | 1.09 (1.03-1.15) | 1.15 (1.10-1.21) |
|                            | 3                                   | 1.15 (0.98-1.35)        | 0.97 (0.90-1.04) | 0.99 (0.93-1.05) | 1.00 (0.94-1.06) | 1.16 (1.10-1.23) | 1.21 (1.16-1.27) |
|                            | 4                                   | 1.17 (0.99-1.37)        | 1.04 (0.96-1.12) | 1.02 (0.96-1.09) | 0.97 (0.92-1.03) | 1.18 (1.12-1.25) | 1.25 (1.19-1.31) |
|                            | 5                                   | 1.32 (1.12-1.55)        | 1.11 (1.03-1.20) | 0.98 (0.92-1.05) | 0.96 (0.90-1.02) | 1.26 (1.19-1.33) | 1.30 (1.24-1.36) |
| Ethnicity                  | White                               | 1.00                    | 1.00             | 1.00             | 1.00             | 1.00             | 1.00             |
|                            | Black / South Asian / Mixed / Other | 1.00 (0.85-1.19)        | -                | -                | -                | -                | -                |
|                            | Black                               | -                       | 0.67 (0.54-0.84) | 0.79 (0.67-0.94) | 0.80 (0.69-0.94) | 0.75 (0.65-0.88) | 0.61 (0.53-0.71) |
|                            | South Asian                         | -                       | 0.74 (0.67-0.83) | 0.96 (0.89-1.04) | 0.91 (0.84-0.99) | 0.86 (0.80-0.93) | 0.84 (0.78-0.89) |
|                            | Mixed                               | -                       | 1.08 (0.87-1.35) | 0.82 (0.67-1.01) | 0.90 (0.75-1.09) | 0.78 (0.65-0.94) | 0.76 (0.64-0.90) |
| BMI                        | Other                               | -                       | 0.60 (0.46-0.78) | 0.85 (0.70-1.02) | 0.82 (0.68-0.98) | 0.66 (0.55-0.80) | 0.76 (0.65-0.88) |
|                            | <30 or missing                      | 1.00                    | 1.00             | 1.00             | 1.00             | 1.00             | 1.00             |
|                            | 40+                                 | 1.10 (0.94-1.28)        | 0.92 (0.85-1.00) | 1.06 (0.99-1.12) | 1.10 (1.03-1.16) | 1.11 (1.05-1.17) | 1.12 (1.07-1.17) |
|                            | 30-34.9                             | 1.02 (0.88-1.17)        | 1.11 (1.04-1.19) | 1.12 (1.06-1.18) | 1.08 (1.03-1.14) | 1.11 (1.06-1.16) | 1.13 (1.08-1.17) |
|                            | 35-39.9                             | 1.08 (0.91-1.29)        | 1.09 (1.00-1.18) | 1.08 (1.01-1.15) | 1.22 (1.15-1.30) | 1.15 (1.08-1.22) | 1.13 (1.07-1.19) |
| Learning disability        | -                                   | 0.34 (0.28-0.41)        | 0.41 (0.36-0.47) | 0.53 (0.47-0.60) | 0.51 (0.45-0.58) | 0.61 (0.55-0.67) |                  |
| Serious mental illness     | -                                   | 0.66 (0.50-0.87)        | 0.62 (0.54-0.71) | 0.59 (0.52-0.66) | 0.54 (0.48-0.61) | 0.52 (0.47-0.58) | 0.52 (0.47-0.57) |
| Morbidity count            | 0                                   | 1.00                    | 1.00             | 1.00             | 1.00             | 1.00             | 1.00             |
|                            | 1                                   | 1.14 (0.98-1.33)        | 0.98 (0.90-1.06) | 0.96 (0.90-1.02) | 0.96 (0.91-1.02) | 0.96 (0.91-1.01) | 0.92 (0.88-0.96) |
|                            | 2+                                  | 0.95 (0.77-1.17)        | 0.87 (0.79-0.97) | 0.94 (0.87-1.01) | 0.96 (0.89-1.03) | 0.90 (0.85-0.97) | 0.86 (0.81-0.91) |
| Flu vaccine                | -                                   | 0.99 (0.89-1.11)        | 0.98 (0.93-1.03) | 1.01 (0.97-1.06) | 1.06 (1.02-1.11) | 1.10 (1.06-1.15) | 1.08 (1.04-1.11) |
| Number of SARS-CoV-2 tests | 0                                   | 1.00                    | 1.00             | 1.00             | 1.00             | 1.00             | 1.00             |
|                            | 1                                   | 1.47 (1.31-1.66)        | 1.49 (1.41-1.58) | 1.32 (1.26-1.39) | 1.33 (1.27-1.39) | 1.26 (1.21-1.32) | 1.28 (1.23-1.33) |
|                            | 2                                   | 1.63 (1.36-1.94)        | 1.44 (1.31-1.57) | 1.44 (1.34-1.55) | 1.40 (1.31-1.50) | 1.37 (1.28-1.45) | 1.35 (1.28-1.43) |
|                            | 3+                                  | 1.69 (1.38-2.07)        | 1.64 (1.49-1.81) | 1.53 (1.42-1.66) | 1.54 (1.44-1.66) | 1.45 (1.35-1.55) | 1.38 (1.30-1.47) |
| Pregnancy                  | -                                   | 0.66 (0.45-0.98)        | 0.81 (0.59-1.12) | 0.99 (0.75-1.32) | 0.95 (0.73-1.25) | 0.85 (0.65-1.10) |                  |

\* Estimates correspond to a 1-year increase in age (or age-squared as indicated) within the given age categories.

**Supplementary Table 37:** Covariate hazard ratios for Non-COVID-19 death in the BNT162b2 vs ChAdOx1 comparison and the 18-64 years and clinically vulnerable subgroup.

| Variable                   | Category                            | Weeks since second dose |                  |                  |                  |                  |                  |
|----------------------------|-------------------------------------|-------------------------|------------------|------------------|------------------|------------------|------------------|
|                            |                                     | 3-6                     | 7-10             | 11-14            | 15-18            | 19-22            | 23-26            |
| Age*                       | 18-64                               | 1.05 (0.94-1.19)        | 1.07 (0.94-1.22) | 1.08 (0.97-1.20) | 1.13 (1.01-1.26) | 1.09 (0.98-1.21) | 1.19 (1.07-1.34) |
|                            | 18-64 squared                       | 1.00 (1.00-1.00)        | 1.00 (1.00-1.00) | 1.00 (1.00-1.00) | 1.00 (1.00-1.00) | 1.00 (1.00-1.00) | 1.00 (1.00-1.00) |
| Sex                        | Female                              | 1.00                    | 1.00             | 1.00             | 1.00             | 1.00             | 1.00             |
|                            | Male                                | 1.95 (1.53-2.47)        | 1.33 (1.08-1.64) | 1.37 (1.13-1.68) | 1.41 (1.16-1.70) | 1.57 (1.29-1.90) | 1.41 (1.17-1.70) |
| IMD                        | 1                                   | 1.00                    | 1.00             | 1.00             | 1.00             | 1.00             | 1.00             |
|                            | 2                                   | 0.99 (0.72-1.37)        | 0.86 (0.64-1.15) | 0.98 (0.74-1.30) | 0.92 (0.69-1.21) | 0.72 (0.54-0.95) | 0.86 (0.66-1.11) |
|                            | 3                                   | 0.84 (0.59-1.19)        | 0.68 (0.49-0.94) | 0.86 (0.63-1.16) | 0.90 (0.67-1.19) | 0.71 (0.53-0.95) | 0.71 (0.54-0.94) |
|                            | 4                                   | 0.84 (0.59-1.21)        | 0.77 (0.56-1.06) | 0.79 (0.58-1.09) | 0.85 (0.63-1.14) | 0.66 (0.49-0.90) | 0.72 (0.54-0.95) |
|                            | 5                                   | 0.75 (0.50-1.11)        | 0.65 (0.46-0.92) | 0.74 (0.54-1.03) | 0.72 (0.52-0.99) | 0.78 (0.58-1.06) | 0.64 (0.48-0.87) |
| Ethnicity                  | White                               | 1.00                    | 1.00             | 1.00             | 1.00             | 1.00             | 1.00             |
|                            | Black / South Asian / Mixed / Other | 0.38 (0.21-0.72)        | 0.60 (0.39-0.94) | -                | -                | -                | 0.67 (0.46-0.99) |
|                            | Black                               | -                       | -                | 0.71 (0.29-1.70) | 1.22 (0.63-2.39) | 1.19 (0.60-2.36) | -                |
|                            | South Asian / Mixed / Other         | -                       | -                | 0.52 (0.31-0.87) | -                | -                | -                |
|                            | South Asian                         | -                       | -                | -                | 0.73 (0.44-1.20) | 0.61 (0.36-1.02) | -                |
| BMI                        | Mixed / Other                       | -                       | -                | -                | 0.75 (0.33-1.70) | 0.71 (0.31-1.63) | -                |
|                            | <30 or missing                      | 1.00                    | 1.00             | 1.00             | 1.00             | 1.00             | 1.00             |
|                            | 40+                                 | 1.15 (0.80-1.63)        | 0.60 (0.41-0.90) | 0.92 (0.67-1.27) | 0.80 (0.58-1.11) | 0.80 (0.58-1.10) | 0.93 (0.70-1.25) |
|                            | 30-34.9                             | 0.92 (0.69-1.22)        | 0.70 (0.53-0.92) | 0.83 (0.64-1.07) | 0.67 (0.52-0.87) | 0.57 (0.43-0.76) | 0.69 (0.54-0.88) |
|                            | 35-39.9                             | 0.86 (0.59-1.27)        | 0.85 (0.61-1.19) | 0.80 (0.57-1.12) | 0.60 (0.42-0.85) | 0.92 (0.68-1.25) | 0.65 (0.47-0.91) |
| Learning disability        | 1.06 (0.52-2.17)                    | -                       | 1.36 (0.76-2.43) | 2.08 (1.29-3.35) | 1.46 (0.83-2.55) | 1.60 (0.92-2.79) |                  |
| Serious mental illness     | 2.04 (1.30-3.18)                    | 1.95 (1.28-2.98)        | 0.87 (0.50-1.53) | 1.85 (1.25-2.72) | 1.34 (0.86-2.09) | 1.15 (0.72-1.83) |                  |
| Morbidity count            | 0                                   | 1.00                    | 1.00             | 1.00             | 1.00             | 1.00             | 1.00             |
|                            | 1                                   | 0.98 (0.67-1.42)        | 1.18 (0.82-1.70) | 1.02 (0.74-1.40) | 0.88 (0.64-1.21) | 0.73 (0.54-0.99) | 1.30 (0.93-1.83) |
|                            | 2+                                  | 2.18 (1.49-3.19)        | 2.46 (1.69-3.57) | 1.74 (1.25-2.41) | 1.94 (1.42-2.65) | 1.46 (1.07-1.98) | 2.47 (1.76-3.48) |
| Flu vaccine                | 0.74 (0.56-0.98)                    | 0.86 (0.66-1.11)        | 0.94 (0.73-1.22) | 0.83 (0.66-1.06) | 1.07 (0.82-1.40) | 1.10 (0.86-1.41) |                  |
| Number of SARS-CoV-2 tests | 0                                   | 1.00                    | 1.00             | 1.00             | 1.00             | 1.00             | 1.00             |
|                            | 1                                   | 1.27 (0.94-1.74)        | 0.96 (0.71-1.30) | 1.32 (1.02-1.71) | 1.02 (0.77-1.35) | 1.00 (0.76-1.32) | 1.08 (0.84-1.40) |
|                            | 2                                   | 1.94 (1.30-2.91)        | 1.58 (1.08-2.31) | 1.24 (0.82-1.88) | 1.88 (1.34-2.63) | 2.07 (1.50-2.84) | 1.32 (0.92-1.91) |
|                            | 3+                                  | 5.37 (4.05-7.11)        | 4.23 (3.25-5.51) | 4.71 (3.67-6.05) | 5.00 (3.95-6.32) | 3.68 (2.84-4.75) | 4.36 (3.45-5.50) |

\* Estimates correspond to a 1-year increase in age (or age-squared as indicated) within the given age categories.



**Supplementary Table 38:** Covariate hazard ratios for Any SARS-CoV-2 test in the BNT162b2 vs ChAdOx1 comparison and the 18-64 years and clinically vulnerable subgroup.

| Variable                   | Category       | Weeks since second dose |                  |                  |                  |                  |                  |
|----------------------------|----------------|-------------------------|------------------|------------------|------------------|------------------|------------------|
|                            |                | 3-6                     | 7-10             | 11-14            | 15-18            | 19-22            | 23-26            |
| Age*                       | 18-64          | 1.04 (1.03-1.04)        | 1.04 (1.04-1.04) | 1.03 (1.02-1.03) | 1.03 (1.03-1.04) | 1.05 (1.05-1.05) | 1.05 (1.05-1.06) |
|                            | 18-64 squared  | 1.00 (1.00-1.00)        | 1.00 (1.00-1.00) | 1.00 (1.00-1.00) | 1.00 (1.00-1.00) | 1.00 (1.00-1.00) | 1.00 (1.00-1.00) |
| Sex                        | Female         | 1.00                    | 1.00             | 1.00             | 1.00             | 1.00             | 1.00             |
|                            | Male           | 0.71 (0.70-0.72)        | 0.75 (0.74-0.76) | 0.81 (0.80-0.82) | 0.79 (0.78-0.80) | 0.78 (0.77-0.79) | 0.78 (0.77-0.79) |
| IMD                        | 1              | 1.00                    | 1.00             | 1.00             | 1.00             | 1.00             | 1.00             |
|                            | 2              | 1.17 (1.15-1.19)        | 1.15 (1.14-1.17) | 1.15 (1.13-1.16) | 1.14 (1.12-1.16) | 1.16 (1.14-1.18) | 1.19 (1.17-1.21) |
|                            | 3              | 1.26 (1.24-1.28)        | 1.25 (1.23-1.27) | 1.23 (1.21-1.25) | 1.26 (1.24-1.28) | 1.28 (1.26-1.30) | 1.32 (1.30-1.34) |
|                            | 4              | 1.34 (1.32-1.37)        | 1.34 (1.32-1.36) | 1.31 (1.29-1.34) | 1.35 (1.32-1.37) | 1.41 (1.39-1.43) | 1.43 (1.41-1.45) |
|                            | 5              | 1.46 (1.44-1.49)        | 1.49 (1.46-1.51) | 1.44 (1.42-1.47) | 1.48 (1.45-1.50) | 1.57 (1.54-1.59) | 1.61 (1.58-1.63) |
| Ethnicity                  | White          | 1.00                    | 1.00             | 1.00             | 1.00             | 1.00             | 1.00             |
|                            | Black          | 0.92 (0.88-0.96)        | 0.86 (0.82-0.89) | 0.92 (0.88-0.96) | 0.92 (0.89-0.96) | 0.88 (0.84-0.91) | 0.85 (0.82-0.88) |
|                            | South Asian    | 0.58 (0.56-0.60)        | 0.53 (0.52-0.55) | 0.58 (0.57-0.60) | 0.59 (0.58-0.61) | 0.63 (0.61-0.64) | 0.65 (0.63-0.66) |
|                            | Mixed          | 0.88 (0.84-0.93)        | 0.85 (0.81-0.89) | 0.90 (0.86-0.95) | 0.88 (0.84-0.93) | 0.86 (0.82-0.90) | 0.87 (0.83-0.91) |
|                            | Other          | 0.71 (0.67-0.75)        | 0.68 (0.65-0.72) | 0.74 (0.70-0.78) | 0.76 (0.73-0.80) | 0.75 (0.72-0.79) | 0.76 (0.73-0.80) |
| BMI                        | <30 or missing | 1.00                    | 1.00             | 1.00             | 1.00             | 1.00             | 1.00             |
|                            | 40+            | 0.92 (0.90-0.93)        | 0.92 (0.91-0.94) | 0.93 (0.91-0.94) | 0.92 (0.90-0.93) | 0.92 (0.91-0.94) | 0.93 (0.92-0.94) |
|                            | 30-34.9        | 0.98 (0.96-0.99)        | 0.98 (0.97-1.00) | 0.98 (0.96-0.99) | 0.96 (0.95-0.97) | 0.98 (0.97-0.99) | 0.98 (0.97-0.99) |
|                            | 35-39.9        | 0.96 (0.94-0.97)        | 0.97 (0.95-0.99) | 0.94 (0.92-0.96) | 0.94 (0.93-0.96) | 0.96 (0.95-0.98) | 0.95 (0.94-0.97) |
| Learning disability        |                | 1.06 (1.03-1.09)        | 0.94 (0.91-0.96) | 1.00 (0.97-1.03) | 1.05 (1.02-1.07) | 0.97 (0.95-1.00) | 1.00 (0.97-1.03) |
| Serious mental illness     |                | 0.71 (0.69-0.73)        | 0.71 (0.69-0.73) | 0.76 (0.74-0.78) | 0.73 (0.71-0.75) | 0.71 (0.69-0.73) | 0.71 (0.69-0.73) |
| Morbidity count            | 0              | 1.00                    | 1.00             | 1.00             | 1.00             | 1.00             | 1.00             |
|                            | 1              | 0.94 (0.93-0.96)        | 0.94 (0.92-0.95) | 0.95 (0.93-0.96) | 0.97 (0.95-0.98) | 0.96 (0.95-0.97) | 0.95 (0.93-0.96) |
|                            | 2+             | 0.87 (0.85-0.88)        | 0.86 (0.84-0.87) | 0.89 (0.87-0.90) | 0.90 (0.88-0.91) | 0.88 (0.86-0.89) | 0.87 (0.86-0.89) |
| Flu vaccine                |                | 1.24 (1.22-1.25)        | 1.22 (1.20-1.23) | 1.20 (1.19-1.22) | 1.19 (1.18-1.21) | 1.20 (1.18-1.21) | 1.21 (1.20-1.23) |
| Number of SARS-CoV-2 tests | 0              | 1.00                    | 1.00             | 1.00             | 1.00             | 1.00             | 1.00             |
|                            | 1              | 1.42 (1.40-1.44)        | 1.44 (1.42-1.45) | 1.39 (1.37-1.41) | 1.37 (1.35-1.39) | 1.36 (1.34-1.37) | 1.34 (1.32-1.36) |
|                            | 2              | 1.75 (1.72-1.79)        | 1.72 (1.69-1.75) | 1.68 (1.65-1.71) | 1.67 (1.64-1.70) | 1.62 (1.59-1.65) | 1.60 (1.57-1.63) |
|                            | 3+             | 2.76 (2.71-2.81)        | 2.59 (2.55-2.64) | 2.50 (2.46-2.55) | 2.43 (2.39-2.47) | 2.28 (2.24-2.32) | 2.20 (2.16-2.24) |
| Pregnancy                  |                | 0.67 (0.60-0.74)        | 0.78 (0.71-0.85) | 0.78 (0.71-0.85) | 0.78 (0.71-0.86) | 0.78 (0.71-0.85) | 0.94 (0.87-1.03) |

\* Estimates correspond to a 1-year increase in age (or age-squared as indicated) within the given age categories.

**Supplementary Table 39:** Covariate hazard ratios for Positive SARS-CoV-2 test in the BNT162b2 vs unvaccinated comparison and the 40-64 years subgroup.

| Variable                   | Category                | Weeks since second dose |                  |                  |                  |                  |                  |
|----------------------------|-------------------------|-------------------------|------------------|------------------|------------------|------------------|------------------|
|                            |                         | 3-6                     | 7-10             | 11-14            | 15-18            | 19-22            | 23-26            |
| Age*                       | 40-45                   | 0.97 (0.95-1.00)        | 1.00 (0.97-1.02) | 0.98 (0.95-1.00) | 0.99 (0.97-1.01) | 0.98 (0.95-1.00) | 0.94 (0.90-0.98) |
|                            | 45-50                   | 0.98 (0.95-1.01)        | 0.98 (0.95-1.01) | 0.99 (0.95-1.02) | 0.99 (0.96-1.02) | 0.97 (0.95-1.00) | 1.00 (0.96-1.04) |
|                            | 50-55                   | 0.93 (0.88-0.97)        | 0.97 (0.93-1.01) | 0.96 (0.92-1.00) | 1.00 (0.96-1.05) | 0.96 (0.92-1.00) | 0.97 (0.93-1.01) |
|                            | 55-60                   | 1.03 (0.96-1.10)        | 1.03 (0.98-1.09) | 0.91 (0.86-0.96) | 0.99 (0.93-1.04) | 0.96 (0.91-1.02) | 0.98 (0.93-1.02) |
|                            | 60-64                   | 0.89 (0.77-1.02)        | 0.93 (0.83-1.03) | 1.00 (0.90-1.10) | 1.00 (0.89-1.12) | 0.90 (0.81-0.99) | 0.92 (0.84-1.01) |
| Sex                        | Female                  | 1.00                    | 1.00             | 1.00             | 1.00             | 1.00             | 1.00             |
|                            | Male                    | 0.77 (0.73-0.81)        | 0.75 (0.71-0.78) | 0.72 (0.69-0.76) | 0.71 (0.68-0.75) | 0.74 (0.71-0.78) | 0.77 (0.72-0.81) |
| IMD                        | 1                       | 1.00                    | 1.00             | 1.00             | 1.00             | 1.00             | 1.00             |
|                            | 2                       | 1.00 (0.93-1.07)        | 1.09 (1.01-1.17) | 1.07 (1.00-1.16) | 1.13 (1.05-1.22) | 1.12 (1.04-1.21) | 1.16 (1.06-1.27) |
|                            | 3                       | 0.97 (0.90-1.05)        | 1.05 (0.97-1.13) | 1.06 (0.98-1.14) | 1.22 (1.14-1.32) | 1.20 (1.12-1.30) | 1.23 (1.12-1.34) |
|                            | 4                       | 0.99 (0.91-1.08)        | 1.10 (1.02-1.20) | 1.11 (1.03-1.21) | 1.26 (1.16-1.36) | 1.22 (1.13-1.32) | 1.35 (1.23-1.48) |
|                            | 5                       | 1.04 (0.95-1.13)        | 1.07 (0.98-1.17) | 1.15 (1.06-1.26) | 1.29 (1.19-1.40) | 1.27 (1.17-1.37) | 1.37 (1.24-1.51) |
| Ethnicity                  | White                   | 1.00                    | 1.00             | 1.00             | 1.00             | 1.00             | 1.00             |
|                            | Black                   | 0.87 (0.78-0.97)        | 0.95 (0.86-1.06) | 0.90 (0.81-1.01) | 0.72 (0.64-0.81) | 0.66 (0.59-0.75) | 0.80 (0.70-0.92) |
|                            | South Asian             | 0.63 (0.57-0.69)        | 0.65 (0.59-0.71) | 0.65 (0.59-0.72) | 0.54 (0.49-0.60) | 0.56 (0.51-0.62) | 0.48 (0.42-0.55) |
|                            | Mixed                   | 0.83 (0.71-0.98)        | -                | 0.72 (0.60-0.86) | 0.79 (0.67-0.93) | 0.88 (0.75-1.02) | -                |
|                            | Other                   | 0.55 (0.47-0.64)        | -                | 0.56 (0.48-0.65) | 0.56 (0.48-0.65) | 0.55 (0.48-0.63) | -                |
|                            | Mixed / Other           | -                       | 0.75 (0.68-0.84) | -                | -                | -                | 0.67 (0.59-0.77) |
| BMI                        | <30 or missing          | 1.00                    | 1.00             | 1.00             | 1.00             | 1.00             | 1.00             |
|                            | 40+                     | 1.62 (1.05-2.49)        | -                | 1.64 (1.04-2.58) | 1.45 (0.90-2.35) | 1.57 (1.01-2.44) | -                |
|                            | 30-34.9                 | 1.38 (1.28-1.50)        | -                | 1.40 (1.29-1.51) | 1.41 (1.31-1.53) | 1.25 (1.16-1.36) | -                |
|                            | 35-39.9                 | 1.38 (1.22-1.57)        | -                | 1.38 (1.22-1.57) | 1.34 (1.18-1.51) | 1.20 (1.06-1.36) | -                |
|                            | 40+ / 30-34.9 / 35-39.9 | -                       | 1.44 (1.35-1.54) | -                | -                | -                | 1.35 (1.25-1.47) |
| Morbidity count            | 0                       | 1.00                    | 1.00             | 1.00             | 1.00             | 1.00             | 1.00             |
|                            | 1 / 2+                  | 1.38 (1.07-1.78)        | 1.04 (0.78-1.40) | 1.14 (0.86-1.53) | -                | -                | 1.12 (0.80-1.57) |
|                            | 1                       | -                       | -                | -                | 0.94 (0.68-1.28) | 1.09 (0.81-1.46) | -                |
|                            | 2+                      | -                       | -                | -                | 0.00 (0.00-0.00) | 0.00 (0.00-0.00) | -                |
| Flu vaccine                |                         | 1.09 (0.99-1.20)        | 1.03 (0.94-1.14) | 0.99 (0.90-1.09) | 1.07 (0.98-1.17) | 1.01 (0.92-1.10) | 1.03 (0.92-1.15) |
| Number of SARS-CoV-2 tests | 0                       | 1.00                    | 1.00             | 1.00             | 1.00             | 1.00             | 1.00             |
|                            | 1                       | 2.13 (1.99-2.29)        | 2.17 (2.03-2.33) | 2.04 (1.91-2.19) | 2.03 (1.90-2.17) | 1.98 (1.85-2.11) | 2.21 (2.04-2.39) |
|                            | 2                       | 2.73 (2.47-3.02)        | 2.21 (1.97-2.47) | 2.19 (1.96-2.44) | 2.29 (2.07-2.54) | 2.23 (2.01-2.47) | 2.49 (2.19-2.83) |
|                            | 3+                      | 2.74 (2.49-3.02)        | 2.64 (2.40-2.90) | 2.74 (2.50-3.01) | 2.59 (2.36-2.85) | 2.44 (2.22-2.68) | 2.55 (2.25-2.88) |
| Pregnancy                  |                         | -                       | -                | 1.11 (0.78-1.57) | 1.01 (0.72-1.44) | 1.19 (0.85-1.66) | -                |

\* Estimates correspond to a 1-year increase in age (or age-squared as indicated) within the given age categories.

**Supplementary Table 40:** Covariate hazard ratios for Any SARS-CoV-2 test in the BNT162b2 vs unvaccinated comparison and the 40-64 years subgroup.

| Variable                   | Category         | Weeks since second dose |                  |                  |                  |                  |                  |
|----------------------------|------------------|-------------------------|------------------|------------------|------------------|------------------|------------------|
|                            |                  | 3-6                     | 7-10             | 11-14            | 15-18            | 19-22            | 23-26            |
| Age*                       | 40-45            | 0.99 (0.98-1.00)        | 1.01 (1.00-1.02) | 0.99 (0.98-1.00) | 1.00 (0.99-1.01) | 0.99 (0.98-1.00) | 1.00 (0.98-1.02) |
|                            | 45-50            | 1.00 (0.98-1.01)        | 1.00 (0.99-1.02) | 0.99 (0.97-1.00) | 1.01 (0.99-1.02) | 1.00 (0.98-1.01) | 1.00 (0.99-1.02) |
|                            | 50-55            | 0.98 (0.96-0.99)        | 0.99 (0.97-1.00) | 0.99 (0.97-1.01) | 1.00 (0.98-1.01) | 0.99 (0.98-1.01) | 1.00 (0.98-1.02) |
|                            | 55-60            | 0.98 (0.96-1.00)        | 1.01 (0.99-1.03) | 0.96 (0.95-0.98) | 0.99 (0.97-1.01) | 0.98 (0.96-1.00) | 0.99 (0.97-1.01) |
|                            | 60-64            | 0.97 (0.94-1.00)        | 0.94 (0.91-0.98) | 0.98 (0.95-1.02) | 0.97 (0.93-1.00) | 0.97 (0.94-1.00) | 0.94 (0.91-0.98) |
| Sex                        | Female           | 1.00                    | 1.00             | 1.00             | 1.00             | 1.00             | 1.00             |
|                            | Male             | 0.74 (0.73-0.75)        | 0.71 (0.69-0.72) | 0.70 (0.68-0.71) | 0.69 (0.68-0.70) | 0.71 (0.70-0.73) | 0.70 (0.69-0.72) |
| IMD                        | 1                | 1.00                    | 1.00             | 1.00             | 1.00             | 1.00             | 1.00             |
|                            | 2                | 1.07 (1.04-1.10)        | 1.13 (1.10-1.16) | 1.13 (1.09-1.16) | 1.16 (1.13-1.20) | 1.16 (1.12-1.19) | 1.18 (1.13-1.22) |
|                            | 3                | 1.13 (1.09-1.16)        | 1.19 (1.16-1.23) | 1.19 (1.15-1.23) | 1.28 (1.24-1.33) | 1.29 (1.25-1.33) | 1.29 (1.24-1.34) |
|                            | 4                | 1.20 (1.16-1.23)        | 1.26 (1.22-1.30) | 1.31 (1.27-1.35) | 1.35 (1.31-1.40) | 1.41 (1.36-1.46) | 1.45 (1.40-1.51) |
|                            | 5                | 1.26 (1.22-1.30)        | 1.35 (1.30-1.39) | 1.39 (1.34-1.43) | 1.53 (1.48-1.58) | 1.56 (1.51-1.62) | 1.62 (1.55-1.69) |
| Ethnicity                  | White            | 1.00                    | 1.00             | 1.00             | 1.00             | 1.00             | 1.00             |
|                            | Black            | 0.91 (0.87-0.95)        | 0.90 (0.86-0.94) | 0.92 (0.88-0.96) | 0.90 (0.86-0.94) | 0.88 (0.84-0.92) | 0.91 (0.86-0.97) |
|                            | South Asian      | 0.58 (0.55-0.60)        | 0.57 (0.55-0.59) | 0.57 (0.55-0.60) | 0.57 (0.54-0.59) | 0.57 (0.54-0.59) | 0.54 (0.51-0.58) |
|                            | Mixed            | 0.84 (0.79-0.89)        | 0.90 (0.84-0.95) | 0.83 (0.78-0.88) | 0.82 (0.77-0.88) | 0.84 (0.79-0.90) | 0.82 (0.76-0.90) |
|                            | Other            | 0.70 (0.66-0.73)        | 0.64 (0.60-0.67) | 0.64 (0.61-0.68) | 0.61 (0.57-0.64) | 0.62 (0.59-0.66) | 0.53 (0.49-0.58) |
| BMI                        | <30 or missing   | 1.00                    | 1.00             | 1.00             | 1.00             | 1.00             | 1.00             |
|                            | 40+              | 1.36 (1.13-1.64)        | 1.02 (0.83-1.26) | 1.35 (1.12-1.64) | 1.30 (1.06-1.60) | 1.36 (1.11-1.66) | 1.23 (0.94-1.62) |
|                            | 30-34.9          | 1.18 (1.15-1.22)        | 1.21 (1.17-1.24) | 1.19 (1.15-1.23) | 1.21 (1.17-1.24) | 1.15 (1.11-1.19) | 1.16 (1.11-1.21) |
|                            | 35-39.9          | 1.12 (1.06-1.17)        | 1.11 (1.05-1.17) | 1.13 (1.07-1.19) | 1.11 (1.05-1.17) | 1.15 (1.09-1.22) | 1.13 (1.06-1.21) |
| Serious mental illness     | 0.90 (0.76-1.07) | 0.91 (0.77-1.07)        | 0.97 (0.82-1.14) | 0.68 (0.56-0.83) | 0.94 (0.78-1.13) | 0.76 (0.60-0.96) |                  |
| Morbidity count            | 0                | 1.00                    | 1.00             | 1.00             | 1.00             | 1.00             | 1.00             |
|                            | 1 / 2+           | 1.26 (1.14-1.39)        | -                | 1.12 (1.00-1.25) | 1.13 (1.00-1.26) | 1.07 (0.95-1.21) | 1.10 (0.96-1.27) |
|                            | 1                | -                       | 1.19 (1.07-1.33) | -                | -                | -                | -                |
|                            | 2+               | -                       | 2.96 (1.72-5.09) | -                | -                | -                | -                |
| Flu vaccine                | 1.26 (1.22-1.30) | 1.20 (1.16-1.23)        | 1.16 (1.12-1.20) | 1.17 (1.13-1.21) | 1.23 (1.19-1.27) | 1.25 (1.20-1.30) |                  |
| Number of SARS-CoV-2 tests | 0                | 1.00                    | 1.00             | 1.00             | 1.00             | 1.00             | 1.00             |
|                            | 1                | 2.14 (2.08-2.20)        | 2.10 (2.05-2.16) | 2.03 (1.98-2.09) | 1.98 (1.93-2.04) | 1.98 (1.92-2.03) | 2.06 (1.99-2.14) |
|                            | 2                | 2.72 (2.62-2.83)        | 2.44 (2.34-2.54) | 2.41 (2.31-2.51) | 2.42 (2.32-2.52) | 2.40 (2.30-2.51) | 2.53 (2.39-2.67) |
|                            | 3+               | 5.82 (5.65-6.01)        | 5.13 (4.97-5.29) | 4.70 (4.55-4.86) | 4.28 (4.13-4.43) | 3.93 (3.79-4.08) | 4.41 (4.22-4.62) |
| Pregnancy                  | 1.84 (1.66-2.04) | 1.59 (1.42-1.78)        | 1.46 (1.29-1.65) | 1.36 (1.18-1.56) | 1.29 (1.12-1.49) | 0.93 (0.72-1.22) |                  |

\* Estimates correspond to a 1-year increase in age (or age-squared as indicated) within the given age categories.

**Supplementary Table 41:** Covariate hazard ratios for COVID-19 hospitalisation in the ChAdOx1 vs unvaccinated comparison and the 40-64 years subgroup.

| Variable                   | Category                            | Weeks since second dose |                  |                  |                  |                  |                  |
|----------------------------|-------------------------------------|-------------------------|------------------|------------------|------------------|------------------|------------------|
|                            |                                     | 3-6                     | 7-10             | 11-14            | 15-18            | 19-22            | 23-26            |
| Age*                       | 40-45                               | 1.01 (0.91-1.11)        | 0.99 (0.90-1.10) | 1.03 (0.92-1.14) | 1.03 (0.93-1.15) | 1.14 (1.02-1.28) | 1.05 (0.87-1.27) |
|                            | 45-50                               | 1.06 (0.95-1.17)        | 1.01 (0.89-1.15) | 0.97 (0.86-1.09) | 1.02 (0.91-1.14) | 1.04 (0.93-1.16) | 1.12 (0.97-1.30) |
|                            | 50-55                               | 1.10 (0.96-1.26)        | 1.05 (0.94-1.16) | 0.98 (0.88-1.09) | 1.08 (0.96-1.22) | 1.08 (0.97-1.20) | 0.98 (0.89-1.09) |
|                            | 55-60                               | 1.01 (0.86-1.19)        | 1.09 (0.97-1.21) | 0.90 (0.80-1.00) | 0.98 (0.87-1.11) | 1.09 (0.97-1.21) | 1.06 (0.96-1.17) |
|                            | 60-64                               | 1.17 (0.89-1.53)        | 0.95 (0.78-1.16) | 1.05 (0.90-1.24) | 0.97 (0.81-1.17) | 0.87 (0.71-1.06) | 0.94 (0.79-1.11) |
| Sex                        | Female                              | 1.00                    | 1.00             | 1.00             | 1.00             | 1.00             | 1.00             |
|                            | Male                                | 1.21 (1.02-1.43)        | 1.21 (1.04-1.42) | 1.29 (1.11-1.51) | 1.44 (1.23-1.69) | 1.38 (1.18-1.60) | 1.46 (1.24-1.72) |
| IMD                        | 1                                   | 1.00                    | 1.00             | 1.00             | 1.00             | 1.00             | 1.00             |
|                            | 2                                   | 0.81 (0.65-1.02)        | 0.98 (0.79-1.22) | 0.97 (0.78-1.20) | 0.97 (0.78-1.20) | 0.96 (0.77-1.20) | 1.15 (0.90-1.47) |
|                            | 3                                   | 0.79 (0.62-1.01)        | 0.89 (0.70-1.13) | 0.78 (0.62-0.99) | 0.90 (0.71-1.14) | 0.95 (0.75-1.19) | 0.94 (0.72-1.22) |
|                            | 4                                   | 0.83 (0.64-1.08)        | 0.84 (0.65-1.09) | 0.86 (0.67-1.10) | 0.89 (0.69-1.13) | 0.91 (0.72-1.16) | 1.10 (0.85-1.43) |
|                            | 5                                   | 0.87 (0.66-1.15)        | 0.95 (0.73-1.24) | 0.84 (0.64-1.10) | 0.75 (0.57-0.99) | 0.91 (0.71-1.18) | 1.21 (0.93-1.58) |
| Ethnicity                  | White                               | 1.00                    | 1.00             | 1.00             | 1.00             | 1.00             | 1.00             |
|                            | Black / South Asian / Mixed / Other | 1.12 (0.92-1.36)        | -                | 1.46 (1.21-1.76) | 1.00 (0.82-1.23) | 0.97 (0.79-1.18) | 1.18 (0.95-1.48) |
|                            | Black                               | -                       | 1.53 (1.16-2.01) | -                | -                | -                | -                |
|                            | South Asian / Mixed / Other         | -                       | 1.15 (0.93-1.42) | -                | -                | -                | -                |
| BMI                        | <30 or missing                      | 1.00                    | 1.00             | 1.00             | 1.00             | 1.00             | 1.00             |
|                            | 40+ / 30-34.9 / 35-39.9             | 2.84 (2.36-3.43)        | 2.50 (2.10-2.97) | 2.49 (2.09-2.97) | 2.75 (2.32-3.26) | 2.73 (2.31-3.23) | 2.29 (1.91-2.74) |
| Morbidity count            | 0                                   | 1.00                    | 1.00             | 1.00             | 1.00             | 1.00             | 1.00             |
|                            | 1 / 2+                              | 1.80 (0.92-3.52)        | -                | 2.09 (1.15-3.80) | 1.65 (0.85-3.20) | 1.11 (0.50-2.49) | 2.24 (1.23-4.07) |
|                            | 1                                   | -                       | 2.02 (1.11-3.69) | -                | -                | -                | -                |
|                            | 2+                                  | -                       | 0.00 (0.00-0.00) | -                | -                | -                | -                |
| Flu vaccine                |                                     | 1.19 (0.89-1.58)        | 1.07 (0.83-1.39) | 1.00 (0.78-1.30) | 1.52 (1.20-1.92) | 0.96 (0.76-1.21) | 1.48 (1.20-1.82) |
| Number of SARS-CoV-2 tests | 0                                   | 1.00                    | 1.00             | 1.00             | 1.00             | 1.00             | 1.00             |
|                            | 1                                   | 1.73 (1.38-2.18)        | 1.54 (1.23-1.92) | 1.57 (1.25-1.96) | 1.55 (1.25-1.93) | 1.32 (1.05-1.64) | 1.43 (1.15-1.79) |
|                            | 2                                   | 2.09 (1.47-2.97)        | 1.54 (1.05-2.24) | 1.76 (1.22-2.53) | 1.64 (1.14-2.34) | 1.14 (0.76-1.70) | 1.60 (1.11-2.31) |
|                            | 3+                                  | 2.21 (1.60-3.06)        | 1.94 (1.42-2.65) | 1.87 (1.35-2.60) | 1.88 (1.35-2.62) | 1.44 (1.02-2.04) | 1.58 (1.10-2.25) |

\* Estimates correspond to a 1-year increase in age (or age-squared as indicated) within the given age categories.

**Supplementary Table 42:** Covariate hazard ratios for COVID-19 death in the ChAdOx1 vs unvaccinated comparison and the 40-64 years subgroup.

| Variable                   | Category                            | Weeks since second dose |                  |                   |                  |                   |                   |
|----------------------------|-------------------------------------|-------------------------|------------------|-------------------|------------------|-------------------|-------------------|
|                            |                                     | 3-6                     | 7-10             | 11-14             | 15-18            | 19-22             | 23-26             |
| Age*                       | 40-45                               | -                       | -                | 2.48 (1.77-3.46)  | 1.22 (0.74-2.02) | 0.95 (0.40-2.26)  | 3.09 (2.98-3.20)  |
|                            | 45-50                               | -                       | -                | 1.27 (0.99-1.63)  | 0.94 (0.92-0.96) | 0.78 (0.53-1.15)  | 1.17 (0.94-1.45)  |
|                            | 50-55                               | -                       | -                | 1.04 (0.52-2.09)  | 1.06 (0.58-1.93) | 0.78 (0.52-1.15)  | 1.13 (0.79-1.61)  |
|                            | 55-60                               | -                       | -                | 0.98 (0.59-1.64)  | 1.28 (0.83-1.97) | 1.27 (0.99-1.62)  | 0.88 (0.60-1.29)  |
|                            | 60-64                               | -                       | -                | 1.03 (0.68-1.56)  | 1.93 (1.00-3.72) | 1.08 (0.61-1.91)  | 1.04 (0.60-1.81)  |
| Sex                        | Female                              | -                       | -                | -                 | -                | 1.00              | 1.00              |
|                            | Male                                | -                       | -                | -                 | -                | 3.05 (1.52-6.11)  | 2.97 (1.44-6.15)  |
| IMD                        | 1                                   | -                       | -                | 1.00              | 1.00             | 1.00              | 1.00              |
|                            | 2 / 3 / 4 / 5                       | -                       | -                | 0.70 (0.35-1.41)  | 0.78 (0.35-1.73) | 0.85 (0.46-1.56)  | -                 |
|                            | 2                                   | -                       | -                | -                 | -                | -                 | 1.27 (0.49-3.27)  |
|                            | 3 / 4 / 5                           | -                       | -                | -                 | -                | -                 | 0.82 (0.33-2.06)  |
| Ethnicity                  | White                               | -                       | -                | 1.00              | 1.00             | 1.00              | 1.00              |
|                            | Black                               | -                       | -                | 0.00 (0.00-0.00)  | -                | 2.48 (1.00-6.13)  | -                 |
|                            | South Asian / Mixed / Other         | -                       | -                | 0.96 (0.35-2.59)  | -                | 0.87 (0.34-2.24)  | -                 |
|                            | Black / South Asian / Mixed / Other | -                       | -                | -                 | 1.63 (0.64-4.15) | -                 | 1.16 (0.46-2.93)  |
| BMI                        | <30 or missing                      | -                       | -                | 1.00              | 1.00             | 1.00              | 1.00              |
|                            | 40+ / 30-34.9 / 35-39.9             | -                       | -                | 2.26 (1.07-4.77)  | 2.88 (1.38-6.00) | 4.38 (2.46-7.80)  | -                 |
|                            | 40+                                 | -                       | -                | -                 | -                | -                 | 0.00 (0.00-0.00)  |
|                            | 30-34.9 / 35-39.9                   | -                       | -                | -                 | -                | -                 | 2.64 (1.35-5.18)  |
| Morbidity count            | 0                                   | -                       | -                | 1.00              | 1.00             | 1.00              | 1.00              |
|                            | 1 / 2+                              | -                       | -                | 3.00 (0.42-21.15) | -                | 2.61 (0.36-18.98) | 3.14 (0.44-22.61) |
|                            | 1                                   | -                       | -                | -                 | 0.00 (0.00-0.00) | -                 | -                 |
|                            | 2+                                  | -                       | -                | -                 | 0.00 (0.00-0.00) | -                 | -                 |
| Flu vaccine                | -                                   | -                       | 0.96 (0.34-2.71) | -                 | -                | -                 |                   |
| Number of SARS-CoV-2 tests | 0                                   | -                       | -                | 1.00              | 1.00             | 1.00              | 1.00              |
|                            | 1 / 2 / 3+                          | -                       | -                | 2.63 (1.33-5.20)  | 2.30 (1.09-4.86) | 0.62 (0.25-1.57)  | 1.20 (0.52-2.79)  |

\* Estimates correspond to a 1-year increase in age (or age-squared as indicated) within the given age categories.

**Supplementary Table 43:** Covariate hazard ratios for Positive SARS-CoV-2 test in the ChAdOx1 vs unvaccinated comparison and the 40-64 years subgroup.

| Variable                   | Category               | Weeks since second dose |                  |                  |                  |                  |                  |
|----------------------------|------------------------|-------------------------|------------------|------------------|------------------|------------------|------------------|
|                            |                        | 3-6                     | 7-10             | 11-14            | 15-18            | 19-22            | 23-26            |
| Age*                       | 40-45                  | 0.97 (0.96-0.99)        | 1.00 (0.98-1.02) | 1.00 (0.99-1.02) | 1.00 (0.98-1.01) | 0.97 (0.96-0.99) | 0.98 (0.96-1.00) |
|                            | 45-50                  | 0.97 (0.95-0.99)        | 0.98 (0.96-1.00) | 0.97 (0.95-0.99) | 0.95 (0.94-0.97) | 0.96 (0.94-0.97) | 0.95 (0.93-0.97) |
|                            | 50-55                  | 0.94 (0.92-0.97)        | 0.96 (0.94-0.98) | 0.96 (0.94-0.97) | 0.93 (0.92-0.95) | 0.93 (0.92-0.95) | 0.96 (0.95-0.97) |
|                            | 55-60                  | 0.94 (0.91-0.97)        | 0.94 (0.92-0.96) | 0.94 (0.92-0.96) | 0.96 (0.94-0.98) | 0.96 (0.94-0.97) | 0.97 (0.96-0.99) |
|                            | 60-64                  | 0.89 (0.84-0.95)        | 0.96 (0.92-1.00) | 0.97 (0.94-1.00) | 0.92 (0.89-0.96) | 0.95 (0.92-0.98) | 0.94 (0.92-0.97) |
| Sex                        | Female                 | 1.00                    | 1.00             | 1.00             | 1.00             | 1.00             | 1.00             |
|                            | Male                   | 0.91 (0.88-0.94)        | 0.94 (0.91-0.96) | 0.87 (0.85-0.90) | 0.86 (0.84-0.89) | 0.92 (0.90-0.94) | 0.99 (0.97-1.01) |
| IMD                        | 1                      | 1.00                    | 1.00             | 1.00             | 1.00             | 1.00             | 1.00             |
|                            | 2                      | 0.98 (0.93-1.04)        | 1.03 (0.98-1.07) | 1.10 (1.05-1.15) | 1.12 (1.07-1.17) | 1.12 (1.08-1.17) | 1.16 (1.11-1.21) |
|                            | 3                      | 0.97 (0.92-1.02)        | 1.02 (0.97-1.07) | 1.08 (1.03-1.13) | 1.19 (1.14-1.24) | 1.22 (1.17-1.27) | 1.18 (1.14-1.23) |
|                            | 4                      | 1.00 (0.95-1.05)        | 1.00 (0.96-1.05) | 1.12 (1.07-1.17) | 1.24 (1.19-1.30) | 1.28 (1.24-1.33) | 1.30 (1.25-1.36) |
|                            | 5                      | 1.09 (1.03-1.15)        | 1.03 (0.98-1.08) | 1.16 (1.11-1.22) | 1.30 (1.24-1.35) | 1.38 (1.33-1.44) | 1.40 (1.34-1.46) |
| Ethnicity                  | White                  | 1.00                    | 1.00             | 1.00             | 1.00             | 1.00             | 1.00             |
|                            | Black                  | 0.84 (0.76-0.92)        | 0.91 (0.83-0.99) | 0.85 (0.77-0.93) | 0.70 (0.64-0.77) | 0.63 (0.58-0.69) | 0.71 (0.65-0.78) |
|                            | South Asian            | 0.67 (0.62-0.72)        | 0.73 (0.68-0.78) | 0.73 (0.68-0.78) | 0.68 (0.64-0.73) | 0.63 (0.59-0.66) | 0.54 (0.50-0.58) |
|                            | Mixed                  | 0.80 (0.70-0.92)        | 0.95 (0.85-1.07) | 0.83 (0.73-0.93) | 0.81 (0.72-0.91) | 0.80 (0.72-0.89) | 0.82 (0.73-0.92) |
|                            | Other                  | 0.58 (0.51-0.65)        | 0.62 (0.56-0.69) | 0.59 (0.53-0.66) | 0.64 (0.58-0.70) | 0.58 (0.53-0.64) | 0.55 (0.50-0.61) |
| BMI                        | <30 or missing         | 1.00                    | 1.00             | 1.00             | 1.00             | 1.00             | 1.00             |
|                            | 40+                    | 1.34 (0.98-1.83)        | 1.12 (0.82-1.51) | 1.44 (1.13-1.84) | 1.01 (0.77-1.34) | 1.30 (1.04-1.61) | 1.40 (1.12-1.75) |
|                            | 30-34.9                | 1.22 (1.16-1.28)        | 1.22 (1.17-1.27) | 1.18 (1.13-1.23) | 1.17 (1.12-1.21) | 1.13 (1.10-1.17) | 1.14 (1.11-1.18) |
|                            | 35-39.9                | 1.20 (1.11-1.30)        | 1.25 (1.17-1.34) | 1.24 (1.16-1.31) | 1.21 (1.14-1.28) | 1.17 (1.11-1.23) | 1.18 (1.12-1.24) |
|                            | Serious mental illness | 0.76 (0.52-1.12)        | 1.04 (0.78-1.40) | 0.73 (0.52-1.02) | 0.78 (0.56-1.08) | 0.54 (0.38-0.77) | 0.71 (0.52-0.96) |
| Morbidity count            | 0                      | 1.00                    | 1.00             | 1.00             | 1.00             | 1.00             | 1.00             |
|                            | 1 / 2+                 | 1.14 (0.93-1.39)        | 1.11 (0.94-1.32) | 1.09 (0.93-1.29) | -                | -                | 1.04 (0.91-1.20) |
|                            | 1                      | -                       | -                | -                | 0.96 (0.80-1.13) | 1.10 (0.96-1.26) | -                |
|                            | 2+                     | -                       | -                | -                | 1.24 (0.40-3.82) | 1.24 (0.46-3.31) | -                |
| Flu vaccine                |                        | 1.06 (1.01-1.11)        | 1.03 (0.99-1.07) | 1.03 (1.00-1.06) | 1.06 (1.02-1.09) | 1.13 (1.10-1.16) | 1.10 (1.07-1.13) |
| Number of SARS-CoV-2 tests | 0                      | 1.00                    | 1.00             | 1.00             | 1.00             | 1.00             | 1.00             |
|                            | 1                      | 1.61 (1.55-1.68)        | 1.52 (1.46-1.58) | 1.44 (1.39-1.49) | 1.40 (1.35-1.44) | 1.34 (1.31-1.38) | 1.35 (1.31-1.39) |
|                            | 2                      | 1.87 (1.75-1.99)        | 1.66 (1.57-1.77) | 1.56 (1.47-1.64) | 1.55 (1.47-1.63) | 1.51 (1.44-1.58) | 1.46 (1.39-1.53) |
|                            | 3+                     | 2.08 (1.96-2.21)        | 1.94 (1.84-2.05) | 1.95 (1.86-2.05) | 2.03 (1.94-2.11) | 1.97 (1.90-2.05) | 2.01 (1.93-2.09) |
| Pregnancy                  |                        | 1.45 (1.10-1.92)        | 1.66 (1.24-2.23) | 1.34 (0.97-1.85) | 1.15 (0.82-1.60) | 0.97 (0.67-1.39) | -                |

\* Estimates correspond to a 1-year increase in age (or age-squared as indicated) within the given age categories.

**Supplementary Table 44:** Covariate hazard ratios for Non-COVID-19 death in the ChAdOx1 vs unvaccinated comparison and the 40-64 years subgroup.

| Variable                   | Category                            | Weeks since second dose |                   |                   |                   |                   |                   |
|----------------------------|-------------------------------------|-------------------------|-------------------|-------------------|-------------------|-------------------|-------------------|
|                            |                                     | 3-6                     | 7-10              | 11-14             | 15-18             | 19-22             | 23-26             |
| Age*                       | 40-45                               | 0.87 (0.58-1.32)        | 1.36 (0.96-1.94)  | 0.98 (0.73-1.32)  | 1.30 (0.99-1.70)  | 1.29 (0.89-1.89)  | 1.52 (1.50-1.55)  |
|                            | 45-50                               | 1.05 (0.81-1.37)        | 1.10 (0.86-1.40)  | 1.24 (0.95-1.60)  | 0.95 (0.72-1.25)  | 1.11 (0.84-1.46)  | 1.40 (0.89-2.19)  |
|                            | 50-55                               | 1.09 (0.87-1.38)        | 0.99 (0.79-1.25)  | 1.11 (0.90-1.37)  | 1.07 (0.89-1.29)  | 1.16 (0.96-1.42)  | 1.04 (0.85-1.27)  |
|                            | 55-60                               | 1.28 (1.02-1.62)        | 0.93 (0.76-1.14)  | 1.01 (0.85-1.20)  | 1.05 (0.90-1.23)  | 1.14 (0.98-1.33)  | 1.07 (0.89-1.29)  |
|                            | 60-64                               | 1.23 (0.95-1.59)        | 1.12 (0.90-1.40)  | 1.15 (0.88-1.49)  | 1.22 (0.98-1.53)  | 0.97 (0.79-1.20)  | 1.05 (0.83-1.32)  |
| Sex                        | Female                              | 1.00                    | 1.00              | 1.00              | 1.00              | 1.00              | 1.00              |
|                            | Male                                | 2.62 (1.84-3.73)        | 1.87 (1.37-2.55)  | 1.58 (1.16-2.16)  | 1.62 (1.22-2.14)  | 1.33 (1.01-1.74)  | 1.38 (1.03-1.84)  |
| IMD                        | 1                                   | 1.00                    | 1.00              | 1.00              | 1.00              | 1.00              | 1.00              |
|                            | 2                                   | 0.65 (0.42-1.02)        | 0.48 (0.31-0.73)  | 0.85 (0.56-1.27)  | 0.71 (0.48-1.04)  | 0.71 (0.50-1.03)  | 0.72 (0.48-1.10)  |
|                            | 3                                   | 0.65 (0.41-1.02)        | 0.51 (0.33-0.78)  | 0.62 (0.40-0.97)  | 0.53 (0.35-0.80)  | 0.47 (0.31-0.71)  | 0.73 (0.48-1.10)  |
|                            | 4                                   | 0.55 (0.34-0.91)        | 0.43 (0.27-0.67)  | 0.61 (0.39-0.96)  | 0.55 (0.37-0.82)  | 0.43 (0.28-0.65)  | 0.44 (0.27-0.71)  |
|                            | 5                                   | 0.38 (0.21-0.67)        | 0.39 (0.24-0.63)  | 0.48 (0.29-0.79)  | 0.35 (0.22-0.56)  | 0.30 (0.18-0.48)  | 0.47 (0.30-0.74)  |
| Ethnicity                  | White                               | 1.00                    | 1.00              | 1.00              | 1.00              | 1.00              | 1.00              |
|                            | Black                               | 0.36 (0.12-1.13)        | -                 | -                 | 0.39 (0.12-1.21)  | -                 | -                 |
|                            | South Asian / Mixed / Other         | 0.31 (0.14-0.66)        | -                 | -                 | 0.42 (0.22-0.82)  | -                 | -                 |
|                            | Black / South Asian / Mixed / Other | -                       | 0.63 (0.38-1.05)  | 0.55 (0.32-0.93)  | -                 | 0.60 (0.36-1.02)  | 0.56 (0.29-1.08)  |
| BMI                        | <30 or missing                      | 1.00                    | 1.00              | 1.00              | 1.00              | 1.00              | 1.00              |
|                            | 40+                                 | 0.00 (0.00-0.00)        | -                 | 0.00 (0.00-0.00)  | 0.00 (0.00-0.00)  | 0.00 (0.00-0.00)  | -                 |
|                            | 30-34.9                             | 0.85 (0.52-1.38)        | -                 | -                 | -                 | -                 | -                 |
|                            | 35-39.9                             | 0.95 (0.44-2.06)        | -                 | -                 | -                 | -                 | -                 |
|                            | 40+ / 30-34.9 / 35-39.9             | -                       | 0.91 (0.61-1.37)  | -                 | -                 | -                 | 0.61 (0.40-0.94)  |
|                            | 30-34.9 / 35-39.9                   | -                       | -                 | 1.16 (0.79-1.68)  | 0.77 (0.52-1.13)  | 0.73 (0.50-1.08)  | -                 |
| Morbidity count            | 0                                   | 1.00                    | 1.00              | 1.00              | 1.00              | 1.00              | 1.00              |
|                            | 1 / 2+                              | 7.82 (4.05-15.11)       | 4.87 (2.26-10.49) | 6.48 (3.28-12.82) | 5.35 (2.62-10.91) | -                 | 5.90 (2.84-12.25) |
|                            | 1                                   | -                       | -                 | -                 | -                 | 7.17 (3.90-13.18) | -                 |
|                            | 2+                                  | -                       | -                 | -                 | -                 | 0.00 (0.00-0.00)  | -                 |
| Flu vaccine                |                                     | 0.87 (0.57-1.32)        | 0.87 (0.60-1.27)  | 0.93 (0.65-1.33)  | -                 | 0.95 (0.69-1.31)  | 0.96 (0.69-1.34)  |
| Number of SARS-CoV-2 tests | 0                                   | 1.00                    | 1.00              | 1.00              | 1.00              | 1.00              | 1.00              |
|                            | 1                                   | 1.83 (1.22-2.75)        | 1.18 (0.77-1.80)  | 1.05 (0.68-1.61)  | 1.28 (0.90-1.83)  | 0.79 (0.51-1.22)  | -                 |
|                            | 2                                   | 1.79 (0.90-3.54)        | 1.60 (0.84-3.04)  | -                 | -                 | 1.39 (0.78-2.50)  | -                 |
|                            | 3+                                  | 2.19 (1.16-4.14)        | 2.45 (1.44-4.18)  | -                 | -                 | 2.31 (1.44-3.69)  | -                 |
|                            | 2 / 3+                              | -                       | -                 | 2.07 (1.37-3.14)  | 1.00 (0.60-1.66)  | -                 | -                 |
|                            | 1 / 2 / 3+                          | -                       | -                 | -                 | -                 | -                 | 0.93 (0.66-1.32)  |

\* Estimates correspond to a 1-year increase in age (or age-squared as indicated) within the given age categories.

**Supplementary Table 45:** Covariate hazard ratios for Any SARS-CoV-2 test in the ChAdOx1 vs unvaccinated comparison and the 40-64 years subgroup.

| Variable                   | Category         | Weeks since second dose |                  |                  |                  |                  |                  |
|----------------------------|------------------|-------------------------|------------------|------------------|------------------|------------------|------------------|
|                            |                  | 3-6                     | 7-10             | 11-14            | 15-18            | 19-22            | 23-26            |
| Age*                       | 40-45            | 0.99 (0.99-1.00)        | 0.99 (0.99-1.00) | 1.00 (0.99-1.00) | 1.00 (0.99-1.00) | 0.99 (0.98-0.99) | 0.99 (0.98-1.00) |
|                            | 45-50            | 0.99 (0.98-1.00)        | 0.99 (0.99-1.00) | 0.98 (0.98-0.99) | 0.98 (0.98-0.99) | 0.98 (0.98-0.99) | 0.98 (0.97-0.98) |
|                            | 50-55            | 0.98 (0.97-0.98)        | 0.98 (0.98-0.99) | 0.97 (0.97-0.98) | 0.98 (0.97-0.98) | 0.97 (0.97-0.98) | 0.98 (0.97-0.98) |
|                            | 55-60            | 0.98 (0.98-0.99)        | 0.98 (0.98-0.99) | 0.98 (0.98-0.99) | 0.99 (0.98-0.99) | 0.99 (0.98-0.99) | 0.99 (0.99-1.00) |
|                            | 60-64            | 0.95 (0.94-0.95)        | 0.95 (0.94-0.96) | 0.96 (0.95-0.97) | 0.96 (0.95-0.96) | 0.96 (0.95-0.97) | 0.97 (0.96-0.97) |
| Sex                        | Female           | 1.00                    | 1.00             | 1.00             | 1.00             | 1.00             | 1.00             |
|                            | Male             | 0.77 (0.76-0.77)        | 0.80 (0.79-0.80) | 0.80 (0.79-0.80) | 0.80 (0.79-0.80) | 0.81 (0.81-0.82) | 0.82 (0.82-0.83) |
| IMD                        | 1                | 1.00                    | 1.00             | 1.00             | 1.00             | 1.00             | 1.00             |
|                            | 2                | 1.11 (1.09-1.13)        | 1.11 (1.10-1.13) | 1.14 (1.13-1.16) | 1.18 (1.16-1.19) | 1.18 (1.16-1.19) | 1.20 (1.18-1.22) |
|                            | 3                | 1.19 (1.17-1.21)        | 1.20 (1.19-1.22) | 1.26 (1.24-1.28) | 1.32 (1.31-1.34) | 1.33 (1.31-1.35) | 1.34 (1.32-1.36) |
|                            | 4                | 1.28 (1.26-1.30)        | 1.28 (1.26-1.30) | 1.36 (1.35-1.38) | 1.45 (1.43-1.47) | 1.47 (1.45-1.49) | 1.49 (1.47-1.51) |
|                            | 5                | 1.38 (1.36-1.40)        | 1.38 (1.36-1.40) | 1.48 (1.46-1.50) | 1.58 (1.56-1.60) | 1.61 (1.59-1.63) | 1.63 (1.61-1.66) |
| Ethnicity                  | White            | 1.00                    | 1.00             | 1.00             | 1.00             | 1.00             | 1.00             |
|                            | Black            | 0.86 (0.83-0.88)        | 0.86 (0.83-0.88) | 0.86 (0.83-0.88) | 0.83 (0.80-0.85) | 0.82 (0.79-0.84) | 0.85 (0.82-0.88) |
|                            | South Asian      | 0.54 (0.53-0.55)        | 0.55 (0.54-0.56) | 0.58 (0.56-0.59) | 0.60 (0.59-0.62) | 0.60 (0.59-0.61) | 0.58 (0.56-0.59) |
|                            | Mixed            | 0.83 (0.80-0.86)        | 0.86 (0.83-0.90) | 0.83 (0.80-0.87) | 0.84 (0.81-0.87) | 0.84 (0.80-0.87) | 0.83 (0.79-0.86) |
|                            | Other            | 0.67 (0.65-0.69)        | 0.66 (0.64-0.68) | 0.66 (0.64-0.68) | 0.65 (0.63-0.67) | 0.64 (0.62-0.66) | 0.62 (0.60-0.64) |
| BMI                        | <30 or missing   | 1.00                    | 1.00             | 1.00             | 1.00             | 1.00             | 1.00             |
|                            | 40+              | 0.96 (0.88-1.05)        | 0.87 (0.80-0.96) | 0.97 (0.89-1.05) | 0.91 (0.83-0.99) | 0.97 (0.90-1.06) | 0.96 (0.88-1.05) |
|                            | 30-34.9          | 1.00 (0.99-1.01)        | 1.00 (0.99-1.02) | 1.00 (0.99-1.01) | 0.99 (0.98-1.00) | 0.99 (0.97-1.00) | 0.99 (0.98-1.01) |
|                            | 35-39.9          | 0.98 (0.96-1.00)        | 0.99 (0.97-1.01) | 0.99 (0.97-1.01) | 0.97 (0.95-0.98) | 0.96 (0.94-0.98) | 0.97 (0.95-0.99) |
| Serious mental illness     | 0.75 (0.68-0.83) | 0.74 (0.67-0.82)        | 0.75 (0.68-0.83) | 0.69 (0.62-0.76) | 0.76 (0.69-0.84) | 0.70 (0.63-0.78) |                  |
| Morbidity count            | 0                | 1.00                    | 1.00             | 1.00             | 1.00             | 1.00             | 1.00             |
|                            | 1                | 1.01 (0.96-1.06)        | 1.03 (0.98-1.08) | 1.00 (0.95-1.05) | 0.99 (0.94-1.03) | 0.99 (0.95-1.04) | 0.99 (0.94-1.04) |
|                            | 2+               | 1.16 (0.82-1.65)        | 1.37 (1.00-1.86) | 0.86 (0.58-1.27) | 0.90 (0.62-1.30) | 0.96 (0.68-1.37) | 1.00 (0.68-1.47) |
| Flu vaccine                | 1.31 (1.30-1.32) | 1.29 (1.28-1.30)        | 1.26 (1.25-1.27) | 1.26 (1.25-1.27) | 1.29 (1.28-1.30) | 1.31 (1.30-1.32) |                  |
| Number of SARS-CoV-2 tests | 0                | 1.00                    | 1.00             | 1.00             | 1.00             | 1.00             | 1.00             |
|                            | 1                | 1.46 (1.45-1.48)        | 1.42 (1.41-1.44) | 1.40 (1.39-1.42) | 1.36 (1.35-1.37) | 1.35 (1.34-1.36) | 1.33 (1.32-1.34) |
|                            | 2                | 1.87 (1.84-1.90)        | 1.75 (1.73-1.78) | 1.71 (1.68-1.73) | 1.65 (1.63-1.68) | 1.61 (1.59-1.64) | 1.58 (1.56-1.61) |
|                            | 3+               | 4.81 (4.75-4.87)        | 3.71 (3.67-3.76) | 3.21 (3.17-3.25) | 3.25 (3.21-3.29) | 3.01 (2.97-3.04) | 2.96 (2.92-3.00) |
| Pregnancy                  | 1.87 (1.68-2.07) | 1.66 (1.48-1.87)        | 1.57 (1.39-1.77) | 1.43 (1.25-1.65) | 1.35 (1.17-1.55) | 0.97 (0.77-1.22) |                  |

\* Estimates correspond to a 1-year increase in age (or age-squared as indicated) within the given age categories.



**Supplementary Table 46:** Covariate hazard ratios for Positive SARS-CoV-2 test in the BNT162b2 vs ChAdOx1 comparison and the 40-64 years subgroup.

| Variable                   | Category                | Weeks since second dose |                  |                  |                  |                  |                  |
|----------------------------|-------------------------|-------------------------|------------------|------------------|------------------|------------------|------------------|
|                            |                         | 3-6                     | 7-10             | 11-14            | 15-18            | 19-22            | 23-26            |
| Age*                       | 40-45                   | 0.97 (0.94-1.00)        | 0.99 (0.97-1.02) | 1.00 (0.98-1.02) | 0.99 (0.97-1.01) | 0.97 (0.96-0.99) | 0.98 (0.95-1.00) |
|                            | 45-50                   | 0.97 (0.94-1.00)        | 0.97 (0.95-1.00) | 0.96 (0.94-0.98) | 0.94 (0.93-0.96) | 0.95 (0.93-0.97) | 0.94 (0.92-0.96) |
|                            | 50-55                   | 0.94 (0.92-0.97)        | 0.96 (0.93-0.98) | 0.95 (0.93-0.97) | 0.92 (0.90-0.94) | 0.93 (0.91-0.95) | 0.96 (0.94-0.97) |
|                            | 55-60                   | 0.92 (0.89-0.95)        | 0.93 (0.91-0.95) | 0.94 (0.92-0.96) | 0.96 (0.94-0.98) | 0.96 (0.94-0.97) | 0.97 (0.96-0.99) |
|                            | 60-64                   | 0.90 (0.84-0.96)        | 0.96 (0.92-1.00) | 0.97 (0.93-1.00) | 0.92 (0.88-0.95) | 0.95 (0.93-0.98) | 0.94 (0.92-0.97) |
| Sex                        | Female                  | 1.00                    | 1.00             | 1.00             | 1.00             | 1.00             | 1.00             |
|                            | Male                    | 1.03 (0.98-1.07)        | 1.05 (1.01-1.08) | 0.94 (0.92-0.97) | 0.92 (0.89-0.94) | 0.97 (0.94-0.99) | 1.03 (1.01-1.06) |
| IMD                        | 1                       | 1.00                    | 1.00             | 1.00             | 1.00             | 1.00             | 1.00             |
|                            | 2                       | 1.00 (0.92-1.07)        | 0.97 (0.92-1.03) | 1.11 (1.05-1.17) | 1.10 (1.05-1.16) | 1.13 (1.08-1.18) | 1.15 (1.10-1.21) |
|                            | 3                       | 0.97 (0.90-1.05)        | 0.98 (0.93-1.04) | 1.08 (1.02-1.14) | 1.18 (1.12-1.24) | 1.23 (1.18-1.29) | 1.17 (1.12-1.23) |
|                            | 4                       | 1.01 (0.94-1.08)        | 0.95 (0.89-1.01) | 1.13 (1.07-1.19) | 1.23 (1.17-1.30) | 1.30 (1.24-1.36) | 1.30 (1.24-1.36) |
|                            | 5                       | 1.12 (1.05-1.20)        | 1.00 (0.95-1.06) | 1.18 (1.12-1.25) | 1.31 (1.25-1.38) | 1.40 (1.34-1.46) | 1.40 (1.34-1.46) |
| Ethnicity                  | White                   | 1.00                    | 1.00             | 1.00             | 1.00             | 1.00             | 1.00             |
|                            | Black                   | 0.63 (0.50-0.80)        | 0.72 (0.60-0.86) | 0.65 (0.55-0.76) | 0.60 (0.51-0.70) | 0.57 (0.50-0.65) | 0.61 (0.53-0.71) |
|                            | South Asian             | 0.75 (0.67-0.84)        | 0.84 (0.76-0.92) | 0.85 (0.78-0.92) | 0.81 (0.76-0.87) | 0.69 (0.64-0.74) | 0.58 (0.53-0.63) |
|                            | Mixed                   | 0.75 (0.59-0.96)        | -                | 0.93 (0.79-1.09) | 0.86 (0.74-1.00) | 0.74 (0.64-0.84) | -                |
|                            | Other                   | 0.67 (0.56-0.81)        | -                | 0.67 (0.58-0.77) | 0.71 (0.63-0.80) | 0.66 (0.59-0.73) | -                |
|                            | Mixed / Other           | -                       | 0.72 (0.64-0.82) | -                | -                | -                | 0.65 (0.59-0.71) |
| BMI                        | <30 or missing          | 1.00                    | 1.00             | 1.00             | 1.00             | 1.00             | 1.00             |
|                            | 40+                     | 1.02 (0.65-1.60)        | -                | 1.41 (1.07-1.86) | 1.07 (0.80-1.43) | 1.20 (0.95-1.52) | -                |
|                            | 30-34.9                 | 1.12 (1.05-1.19)        | -                | 1.11 (1.07-1.16) | 1.09 (1.05-1.14) | 1.09 (1.05-1.13) | -                |
|                            | 35-39.9                 | 1.07 (0.97-1.18)        | -                | 1.17 (1.09-1.25) | 1.15 (1.08-1.23) | 1.13 (1.07-1.20) | -                |
|                            | 40+ / 30-34.9 / 35-39.9 | -                       | 1.14 (1.09-1.19) | -                | -                | -                | 1.13 (1.09-1.16) |
| Morbidity count            | 0                       | 1.00                    | 1.00             | 1.00             | 1.00             | 1.00             | 1.00             |
|                            | 1 / 2+                  | 0.94 (0.70-1.26)        | 1.19 (0.97-1.45) | 1.02 (0.84-1.23) | -                | -                | 1.03 (0.89-1.20) |
|                            | 1                       | -                       | -                | -                | 0.96 (0.80-1.17) | 1.03 (0.89-1.21) | -                |
|                            | 2+                      | -                       | -                | -                | 1.69 (0.55-5.18) | 1.55 (0.58-4.14) | -                |
| Flu vaccine                |                         | 1.06 (1.01-1.11)        | 1.05 (1.01-1.10) | 1.07 (1.04-1.11) | 1.09 (1.05-1.12) | 1.16 (1.13-1.19) | 1.13 (1.10-1.16) |
| Number of SARS-CoV-2 tests | 0                       | 1.00                    | 1.00             | 1.00             | 1.00             | 1.00             | 1.00             |
|                            | 1                       | 1.36 (1.29-1.43)        | 1.32 (1.26-1.38) | 1.27 (1.23-1.32) | 1.26 (1.22-1.31) | 1.23 (1.20-1.27) | 1.27 (1.23-1.31) |
|                            | 2                       | 1.45 (1.33-1.58)        | 1.49 (1.39-1.59) | 1.39 (1.31-1.48) | 1.37 (1.29-1.45) | 1.35 (1.29-1.42) | 1.35 (1.29-1.42) |
|                            | 3+                      | 1.75 (1.63-1.88)        | 1.71 (1.61-1.82) | 1.79 (1.70-1.89) | 1.86 (1.78-1.95) | 1.87 (1.80-1.95) | 1.94 (1.86-2.02) |
| Pregnancy                  |                         | -                       | -                | 1.04 (0.60-1.80) | 0.56 (0.30-1.03) | 0.72 (0.45-1.16) | -                |

\* Estimates correspond to a 1-year increase in age (or age-squared as indicated) within the given age categories.

**Supplementary Table 47: Covariate hazard ratios for Any SARS-CoV-2 test in the BNT162b2 vs ChAdOx1 comparison and the 40-64 years subgroup.**

| Variable                   | Category         | Weeks since second dose |                  |                  |                  |                  |                  |
|----------------------------|------------------|-------------------------|------------------|------------------|------------------|------------------|------------------|
|                            |                  | 3-6                     | 7-10             | 11-14            | 15-18            | 19-22            | 23-26            |
| Age*                       | 40-45            | 0.99 (0.98-1.00)        | 0.99 (0.98-1.00) | 0.99 (0.99-1.00) | 0.99 (0.98-1.00) | 0.98 (0.98-0.99) | 0.98 (0.97-0.99) |
|                            | 45-50            | 0.99 (0.98-0.99)        | 0.99 (0.98-0.99) | 0.98 (0.97-0.99) | 0.98 (0.97-0.98) | 0.97 (0.97-0.98) | 0.97 (0.96-0.98) |
|                            | 50-55            | 0.98 (0.97-0.98)        | 0.98 (0.97-0.99) | 0.97 (0.97-0.98) | 0.97 (0.97-0.98) | 0.97 (0.96-0.97) | 0.97 (0.97-0.98) |
|                            | 55-60            | 0.98 (0.98-0.99)        | 0.98 (0.98-0.99) | 0.98 (0.98-0.99) | 0.99 (0.98-0.99) | 0.99 (0.98-0.99) | 0.99 (0.99-1.00) |
|                            | 60-64            | 0.94 (0.94-0.95)        | 0.95 (0.94-0.96) | 0.95 (0.95-0.96) | 0.95 (0.95-0.96) | 0.96 (0.95-0.97) | 0.97 (0.96-0.97) |
| Sex                        | Female           | 1.00                    | 1.00             | 1.00             | 1.00             | 1.00             | 1.00             |
|                            | Male             | 0.78 (0.77-0.79)        | 0.82 (0.81-0.82) | 0.82 (0.81-0.82) | 0.82 (0.81-0.82) | 0.83 (0.83-0.84) | 0.84 (0.83-0.85) |
| IMD                        | 1                | 1.00                    | 1.00             | 1.00             | 1.00             | 1.00             | 1.00             |
|                            | 2                | 1.13 (1.11-1.15)        | 1.12 (1.10-1.14) | 1.16 (1.14-1.18) | 1.18 (1.17-1.20) | 1.18 (1.17-1.20) | 1.21 (1.19-1.23) |
|                            | 3                | 1.21 (1.19-1.22)        | 1.21 (1.20-1.23) | 1.28 (1.26-1.30) | 1.34 (1.32-1.36) | 1.34 (1.32-1.36) | 1.35 (1.33-1.37) |
|                            | 4                | 1.30 (1.28-1.32)        | 1.29 (1.27-1.31) | 1.39 (1.36-1.41) | 1.46 (1.44-1.48) | 1.48 (1.45-1.50) | 1.50 (1.48-1.52) |
|                            | 5                | 1.39 (1.37-1.41)        | 1.39 (1.37-1.41) | 1.50 (1.47-1.52) | 1.59 (1.57-1.62) | 1.62 (1.59-1.64) | 1.64 (1.62-1.67) |
| Ethnicity                  | White            | 1.00                    | 1.00             | 1.00             | 1.00             | 1.00             | 1.00             |
|                            | Black            | 0.81 (0.78-0.84)        | 0.82 (0.79-0.85) | 0.80 (0.77-0.83) | 0.76 (0.73-0.79) | 0.77 (0.74-0.80) | 0.80 (0.76-0.83) |
|                            | South Asian      | 0.53 (0.51-0.54)        | 0.54 (0.53-0.56) | 0.59 (0.58-0.61) | 0.63 (0.61-0.64) | 0.62 (0.61-0.64) | 0.59 (0.58-0.61) |
|                            | Mixed            | 0.84 (0.80-0.88)        | 0.85 (0.81-0.89) | 0.84 (0.80-0.88) | 0.85 (0.81-0.88) | 0.83 (0.79-0.86) | 0.82 (0.78-0.86) |
|                            | Other            | 0.69 (0.66-0.71)        | 0.69 (0.67-0.72) | 0.69 (0.66-0.71) | 0.68 (0.66-0.71) | 0.66 (0.64-0.69) | 0.66 (0.63-0.68) |
| BMI                        | <30 or missing   | 1.00                    | 1.00             | 1.00             | 1.00             | 1.00             | 1.00             |
|                            | 40+              | 0.92 (0.84-1.01)        | 0.87 (0.79-0.95) | 0.91 (0.83-1.00) | 0.89 (0.81-0.97) | 0.92 (0.84-1.00) | 0.94 (0.85-1.03) |
|                            | 30-34.9          | 0.98 (0.97-0.99)        | 0.98 (0.97-0.99) | 0.98 (0.97-0.99) | 0.97 (0.96-0.98) | 0.97 (0.96-0.98) | 0.98 (0.97-0.99) |
|                            | 35-39.9          | 0.96 (0.94-0.98)        | 0.97 (0.95-0.99) | 0.97 (0.95-0.99) | 0.94 (0.93-0.96) | 0.94 (0.92-0.96) | 0.96 (0.94-0.98) |
| Serious mental illness     | 0.70 (0.62-0.79) | 0.67 (0.59-0.76)        | 0.68 (0.60-0.77) | 0.68 (0.61-0.77) | 0.72 (0.64-0.80) | 0.69 (0.61-0.77) |                  |
| Morbidity count            | 0                | 1.00                    | 1.00             | 1.00             | 1.00             | 1.00             | 1.00             |
|                            | 1 / 2+           | 0.96 (0.91-1.01)        | -                | 0.97 (0.92-1.02) | 0.95 (0.90-1.00) | 0.95 (0.91-1.00) | 0.96 (0.92-1.01) |
|                            | 1                | -                       | 0.98 (0.93-1.03) | -                | -                | -                | -                |
|                            | 2+               | -                       | 1.16 (0.82-1.65) | -                | -                | -                | -                |
| Flu vaccine                | 1.30 (1.29-1.31) | 1.28 (1.27-1.29)        | 1.27 (1.26-1.28) | 1.26 (1.25-1.27) | 1.30 (1.29-1.31) | 1.33 (1.31-1.34) |                  |
| Number of SARS-CoV-2 tests | 0                | 1.00                    | 1.00             | 1.00             | 1.00             | 1.00             | 1.00             |
|                            | 1                | 1.37 (1.35-1.38)        | 1.33 (1.32-1.35) | 1.32 (1.30-1.33) | 1.29 (1.27-1.30) | 1.29 (1.27-1.30) | 1.28 (1.27-1.29) |
|                            | 2                | 1.74 (1.71-1.77)        | 1.64 (1.62-1.67) | 1.60 (1.57-1.62) | 1.56 (1.53-1.58) | 1.53 (1.51-1.55) | 1.51 (1.48-1.53) |
|                            | 3+               | 4.50 (4.45-4.56)        | 3.47 (3.43-3.52) | 3.00 (2.96-3.04) | 3.08 (3.04-3.12) | 2.86 (2.83-2.90) | 2.85 (2.81-2.89) |
| Pregnancy                  | 1.02 (0.86-1.21) | 0.97 (0.83-1.15)        | 0.84 (0.71-0.99) | 0.83 (0.70-0.99) | 0.80 (0.68-0.94) | 0.55 (0.40-0.77) |                  |

\* Estimates correspond to a 1-year increase in age (or age-squared as indicated) within the given age categories.

**Supplementary Table 48:** Covariate hazard ratios for COVID-19 hospitalisation in the BNT162b2 vs unvaccinated comparison and the 18-39 years subgroup.

| Variable                   | Category                            | Weeks since second dose |                  |                  |                   |                  |       |
|----------------------------|-------------------------------------|-------------------------|------------------|------------------|-------------------|------------------|-------|
|                            |                                     | 3-6                     | 7-10             | 11-14            | 15-18             | 19-22            | 23-26 |
| Age*                       | 18-25                               | 1.05 (0.96-1.16)        | 1.13 (1.02-1.24) | 1.09 (0.98-1.21) | 1.08 (0.93-1.25)  | -                | -     |
|                            | 25-30                               | 1.09 (0.98-1.20)        | 1.10 (0.98-1.23) | 1.06 (0.95-1.19) | 1.05 (0.90-1.24)  | 1.18 (0.80-1.74) | -     |
|                            | 30-36                               | 0.94 (0.88-1.00)        | 1.09 (1.01-1.18) | 1.06 (0.99-1.14) | 1.14 (1.05-1.24)  | 0.92 (0.82-1.04) | -     |
|                            | 36-40                               | 1.08 (0.96-1.22)        | 1.10 (0.96-1.25) | 1.00 (0.87-1.15) | 1.17 (1.02-1.33)  | 1.10 (0.91-1.33) | -     |
| Sex                        | Female                              | 1.00                    | 1.00             | 1.00             | 1.00              | 1.00             | -     |
|                            | Male                                | 0.81 (0.68-0.97)        | 0.69 (0.57-0.85) | 0.70 (0.58-0.85) | 0.68 (0.54-0.84)  | 0.77 (0.55-1.09) | -     |
| IMD                        | 1                                   | 1.00                    | 1.00             | 1.00             | 1.00              | 1.00             | -     |
|                            | 2 / 3 / 4 / 5                       | 0.84 (0.72-0.99)        | -                | -                | -                 | -                | -     |
|                            | 2                                   | -                       | 1.10 (0.88-1.36) | 1.11 (0.89-1.38) | 0.84 (0.65-1.09)  | 0.94 (0.61-1.45) | -     |
|                            | 3                                   | -                       | 0.90 (0.70-1.15) | 0.90 (0.70-1.16) | 0.98 (0.75-1.28)  | 0.98 (0.62-1.54) | -     |
|                            | 4                                   | -                       | 0.88 (0.67-1.16) | 0.88 (0.67-1.17) | 0.67 (0.48-0.93)  | -                | -     |
|                            | 5                                   | -                       | 0.86 (0.63-1.17) | 0.91 (0.66-1.25) | 0.87 (0.62-1.23)  | -                | -     |
| Ethnicity                  | 4 / 5                               | -                       | -                | -                | -                 | 0.92 (0.59-1.42) | -     |
|                            | White                               | 1.00                    | 1.00             | 1.00             | 1.00              | 1.00             | -     |
|                            | Black                               | 1.40 (1.03-1.89)        | 0.73 (0.46-1.15) | -                | -                 | -                | -     |
|                            | South Asian                         | 1.22 (0.99-1.51)        | -                | -                | -                 | -                | -     |
|                            | Mixed                               | 1.03 (0.68-1.57)        | -                | -                | -                 | -                | -     |
|                            | Other                               | 0.76 (0.52-1.13)        | -                | -                | -                 | -                | -     |
| BMI                        | South Asian / Mixed / Other         | -                       | 0.95 (0.76-1.18) | -                | -                 | -                | -     |
|                            | Black / South Asian / Mixed / Other | -                       | -                | 1.05 (0.86-1.28) | 1.02 (0.82-1.28)  | 0.85 (0.57-1.27) | -     |
|                            | <30 or missing                      | 1.00                    | 1.00             | 1.00             | 1.00              | 1.00             | -     |
|                            | 40+ / 30-34.9 / 35-39.9             | 2.47 (2.06-2.96)        | -                | 2.78 (2.26-3.42) | -                 | -                | -     |
|                            | 40+                                 | -                       | 3.21 (1.34-7.68) | -                | 4.18 (1.56-11.21) | 0.00 (0.00-0.00) | -     |
|                            | 30-34.9 / 35-39.9                   | -                       | 2.01 (1.62-2.50) | -                | 1.94 (1.50-2.52)  | -                | -     |
| Morbidity count            | 30-34.9                             | -                       | -                | -                | -                 | 2.60 (1.67-4.04) | -     |
|                            | 35-39.9                             | -                       | -                | -                | -                 | 2.55 (1.32-4.93) | -     |
|                            | 0                                   | 1.00                    | 1.00             | 1.00             | 1.00              | 1.00             | -     |
|                            | 1 / 2+                              | 0.92 (0.53-1.62)        | -                | -                | -                 | 1.02 (0.24-4.35) | -     |
| Flu vaccine                | 1                                   | -                       | 1.09 (0.59-2.02) | 0.35 (0.11-1.10) | 0.71 (0.26-1.93)  | -                | -     |
|                            | 2+                                  | -                       | 0.00 (0.00-0.00) | 0.00 (0.00-0.00) | 0.00 (0.00-0.00)  | -                | -     |
|                            | 0                                   | 0.95 (0.77-1.16)        | 1.23 (0.98-1.55) | 1.00 (0.78-1.27) | 0.93 (0.69-1.25)  | 0.76 (0.45-1.28) | -     |
| Number of SARS-CoV-2 tests | 0                                   | 1.00                    | 1.00             | 1.00             | 1.00              | 1.00             | -     |
|                            | 1 / 2 / 3+                          | 1.61 (1.38-1.89)        | -                | -                | -                 | -                | -     |
|                            | 1                                   | -                       | 1.61 (1.29-2.00) | 1.57 (1.26-1.96) | 1.32 (1.00-1.73)  | 1.56 (1.04-2.33) | -     |
|                            | 2                                   | -                       | 1.87 (1.41-2.48) | 1.49 (1.09-2.04) | 1.34 (0.91-1.96)  | -                | -     |
|                            | 3+                                  | -                       | 1.63 (1.25-2.13) | 1.95 (1.50-2.52) | 2.32 (1.75-3.06)  | -                | -     |
|                            | 2 / 3+                              | -                       | -                | -                | -                 | 1.80 (1.18-2.75) | -     |

**Supplementary Table 48:** Covariate hazard ratios for COVID-19 hospitalisation in the BNT162b2 vs unvaccinated comparison and the 18-39 years subgroup. *(continued)*

| Variable  | Category | Weeks since second dose |                   |                  |                  |                   |       |
|-----------|----------|-------------------------|-------------------|------------------|------------------|-------------------|-------|
|           |          | 3-6                     | 7-10              | 11-14            | 15-18            | 19-22             | 23-26 |
| Pregnancy |          | 9.35 (7.68-11.39)       | 8.10 (6.46-10.16) | 6.83 (5.41-8.62) | 6.23 (4.69-8.27) | 6.66 (4.12-10.77) | -     |

\* Estimates correspond to a 1-year increase in age (or age-squared as indicated) within the given age categories.

**Supplementary Table 49:** Covariate hazard ratios for Positive SARS-CoV-2 test in the BNT162b2 vs unvaccinated comparison and the 18-39 years subgroup.

| Variable                   | Category                            | Weeks since second dose |                  |                  |                  |                  |                  |
|----------------------------|-------------------------------------|-------------------------|------------------|------------------|------------------|------------------|------------------|
|                            |                                     | 3-6                     | 7-10             | 11-14            | 15-18            | 19-22            | 23-26            |
| Age*                       | 18-25                               | 0.98 (0.97-1.00)        | 1.00 (0.99-1.02) | 1.02 (1.01-1.03) | 1.03 (1.02-1.05) | -                | -                |
|                            | 25-30                               | 1.00 (0.98-1.02)        | 1.04 (1.01-1.06) | 1.02 (1.00-1.04) | 1.00 (0.98-1.02) | 0.98 (0.94-1.02) | -                |
|                            | 30-36                               | 0.99 (0.98-1.00)        | 1.05 (1.03-1.06) | 1.03 (1.02-1.05) | 1.02 (1.00-1.03) | 0.99 (0.97-1.00) | -                |
|                            | 36-40                               | 0.97 (0.94-1.00)        | 1.02 (0.99-1.05) | 1.02 (0.99-1.04) | 1.03 (1.01-1.05) | 1.01 (0.99-1.03) | 1.05 (0.93-1.18) |
| Sex                        | Female                              | 1.00                    | 1.00             | 1.00             | 1.00             | 1.00             | 1.00             |
|                            | Male                                | 0.80 (0.77-0.82)        | 0.73 (0.70-0.75) | 0.72 (0.70-0.74) | 0.73 (0.71-0.75) | 0.79 (0.76-0.82) | 0.46 (0.34-0.63) |
| IMD                        | 1                                   | 1.00                    | 1.00             | 1.00             | 1.00             | 1.00             | 1.00             |
|                            | 2                                   | 0.98 (0.94-1.02)        | 1.04 (1.00-1.08) | 1.06 (1.02-1.10) | 1.06 (1.02-1.10) | 1.06 (1.00-1.12) | 1.07 (0.70-1.62) |
|                            | 3                                   | 0.98 (0.94-1.02)        | 1.01 (0.97-1.06) | 1.05 (1.00-1.09) | 1.11 (1.07-1.15) | 1.13 (1.06-1.20) | 1.08 (0.70-1.68) |
|                            | 4                                   | 0.92 (0.88-0.97)        | 0.97 (0.93-1.02) | 1.01 (0.97-1.06) | 1.12 (1.08-1.17) | 1.12 (1.06-1.20) | 1.41 (0.90-2.20) |
|                            | 5                                   | 0.89 (0.84-0.94)        | 0.91 (0.86-0.96) | 1.04 (1.00-1.09) | 1.17 (1.12-1.22) | 1.20 (1.13-1.28) | 1.10 (0.64-1.88) |
| Ethnicity                  | White                               | 1.00                    | 1.00             | 1.00             | 1.00             | 1.00             | 1.00             |
|                            | Black                               | 0.88 (0.81-0.94)        | 0.65 (0.59-0.71) | 0.74 (0.69-0.80) | 0.79 (0.73-0.85) | 0.79 (0.70-0.89) | -                |
|                            | South Asian                         | 0.63 (0.60-0.67)        | 0.65 (0.61-0.68) | 0.59 (0.55-0.62) | 0.52 (0.49-0.55) | 0.44 (0.41-0.49) | -                |
|                            | Mixed                               | 0.90 (0.82-0.98)        | 0.73 (0.67-0.81) | 0.80 (0.74-0.87) | 0.82 (0.75-0.89) | 0.92 (0.81-1.04) | -                |
|                            | Other                               | 0.44 (0.41-0.49)        | 0.42 (0.38-0.46) | 0.43 (0.40-0.47) | 0.44 (0.40-0.48) | 0.50 (0.44-0.57) | -                |
|                            | Black / South Asian / Mixed / Other | -                       | -                | -                | -                | -                | 0.61 (0.41-0.92) |
| BMI                        | <30 or missing                      | 1.00                    | 1.00             | 1.00             | 1.00             | 1.00             | 1.00             |
|                            | 40+                                 | 1.42 (1.12-1.81)        | 1.28 (0.99-1.66) | 1.44 (1.16-1.79) | 1.27 (1.01-1.59) | 0.97 (0.66-1.44) | 0.00 (0.00-0.00) |
|                            | 30-34.9                             | 1.29 (1.23-1.37)        | 1.29 (1.23-1.37) | 1.21 (1.15-1.27) | 1.11 (1.06-1.17) | 1.10 (1.03-1.18) | 1.50 (0.92-2.44) |
|                            | 35-39.9                             | 1.32 (1.22-1.43)        | 1.24 (1.14-1.34) | 1.23 (1.15-1.33) | 1.15 (1.07-1.23) | 0.91 (0.81-1.02) | 0.78 (0.29-2.15) |
| Serious mental illness     | -                                   | -                       | -                | 0.80 (0.53-1.20) | -                | -                |                  |
| Morbidity count            | 0                                   | 1.00                    | 1.00             | 1.00             | 1.00             | 1.00             | 1.00             |
|                            | 1                                   | 0.92 (0.77-1.11)        | -                | -                | -                | 1.17 (0.89-1.53) | -                |
|                            | 2+                                  | 0.00 (0.00-0.00)        | -                | -                | -                | 0.00 (0.00-0.00) | -                |
|                            | 1 / 2+                              | -                       | 1.06 (0.89-1.27) | 0.97 (0.81-1.15) | 1.24 (1.05-1.46) | -                | 2.02 (0.49-8.36) |
| Flu vaccine                |                                     | 1.03 (0.98-1.08)        | 1.04 (0.99-1.09) | 1.03 (0.99-1.07) | 0.99 (0.96-1.03) | 0.99 (0.94-1.04) | 0.78 (0.47-1.29) |
| Number of SARS-CoV-2 tests | 0                                   | 1.00                    | 1.00             | 1.00             | 1.00             | 1.00             | 1.00             |
|                            | 1                                   | 1.97 (1.90-2.04)        | 1.86 (1.79-1.93) | 1.84 (1.78-1.90) | 1.77 (1.71-1.83) | 1.74 (1.65-1.83) | 2.29 (1.55-3.39) |
|                            | 2                                   | 2.12 (2.01-2.23)        | 2.07 (1.96-2.18) | 2.04 (1.95-2.13) | 1.87 (1.79-1.95) | 1.98 (1.86-2.12) | 3.48 (2.14-5.65) |
|                            | 3+                                  | 2.51 (2.40-2.63)        | 2.50 (2.39-2.61) | 2.36 (2.27-2.45) | 2.22 (2.14-2.31) | 2.12 (2.00-2.24) | 2.27 (1.37-3.76) |
| Pregnancy                  |                                     | 1.15 (1.07-1.23)        | 1.15 (1.07-1.23) | 1.09 (1.02-1.17) | 0.98 (0.90-1.06) | 1.01 (0.89-1.14) | -                |

\* Estimates correspond to a 1-year increase in age (or age-squared as indicated) within the given age categories.

**Supplementary Table 50: Covariate hazard ratios for Any SARS-CoV-2 test in the BNT162b2 vs unvaccinated comparison and the 18-39 years subgroup.**

| Variable                   | Category                            | Weeks since second dose |                  |                  |                  |                  |                  |
|----------------------------|-------------------------------------|-------------------------|------------------|------------------|------------------|------------------|------------------|
|                            |                                     | 3-6                     | 7-10             | 11-14            | 15-18            | 19-22            | 23-26            |
| Age*                       | 18-25                               | 0.99 (0.99-0.99)        | 1.02 (1.02-1.03) | 1.03 (1.03-1.04) | 1.03 (1.02-1.03) | -                | -                |
|                            | 25-30                               | 0.99 (0.98-0.99)        | 1.01 (1.00-1.01) | 1.00 (1.00-1.01) | 1.01 (1.00-1.02) | 0.99 (0.97-1.01) | -                |
|                            | 30-36                               | 0.98 (0.98-0.99)        | 0.99 (0.99-0.99) | 0.99 (0.99-1.00) | 0.99 (0.99-1.00) | 0.98 (0.98-0.99) | -                |
|                            | 36-40                               | 0.98 (0.97-0.99)        | 0.99 (0.98-0.99) | 1.00 (0.99-1.00) | 1.00 (0.99-1.01) | 0.99 (0.98-0.99) | 1.06 (1.01-1.11) |
| Sex                        | Female                              | 1.00                    | 1.00             | 1.00             | 1.00             | 1.00             | 1.00             |
|                            | Male                                | 0.80 (0.80-0.81)        | 0.76 (0.75-0.77) | 0.76 (0.75-0.76) | 0.75 (0.75-0.76) | 0.79 (0.77-0.80) | 0.59 (0.53-0.67) |
| IMD                        | 1                                   | 1.00                    | 1.00             | 1.00             | 1.00             | 1.00             | 1.00             |
|                            | 2                                   | 1.08 (1.06-1.09)        | 1.07 (1.06-1.09) | 1.07 (1.06-1.09) | 1.09 (1.08-1.11) | 1.08 (1.06-1.11) | 1.23 (1.04-1.45) |
|                            | 3                                   | 1.13 (1.12-1.15)        | 1.12 (1.10-1.14) | 1.13 (1.12-1.15) | 1.16 (1.15-1.18) | 1.21 (1.18-1.24) | 1.24 (1.04-1.48) |
|                            | 4                                   | 1.19 (1.17-1.20)        | 1.16 (1.14-1.18) | 1.17 (1.15-1.19) | 1.22 (1.20-1.24) | 1.27 (1.24-1.30) | 1.40 (1.17-1.67) |
|                            | 5                                   | 1.24 (1.22-1.25)        | 1.22 (1.20-1.24) | 1.22 (1.20-1.24) | 1.28 (1.26-1.30) | 1.35 (1.31-1.38) | 1.37 (1.13-1.66) |
| Ethnicity                  | White                               | 1.00                    | 1.00             | 1.00             | 1.00             | 1.00             | 1.00             |
|                            | Black                               | 0.93 (0.90-0.95)        | 0.87 (0.85-0.90) | 0.95 (0.92-0.97) | 0.96 (0.93-0.99) | 0.92 (0.88-0.97) | -                |
|                            | South Asian                         | 0.64 (0.63-0.65)        | 0.69 (0.68-0.70) | 0.70 (0.69-0.71) | 0.66 (0.65-0.67) | 0.60 (0.58-0.62) | -                |
|                            | Mixed                               | 0.96 (0.93-0.99)        | 0.92 (0.89-0.95) | 0.95 (0.92-0.98) | 0.96 (0.93-0.99) | 0.92 (0.88-0.97) | -                |
|                            | Other                               | 0.65 (0.64-0.67)        | 0.66 (0.65-0.68) | 0.60 (0.59-0.62) | 0.61 (0.60-0.63) | 0.63 (0.61-0.66) | -                |
|                            | Black / South Asian / Mixed / Other | -                       | -                | -                | -                | -                | 0.61 (0.52-0.72) |
| BMI                        | <30 or missing                      | 1.00                    | 1.00             | 1.00             | 1.00             | 1.00             | 1.00             |
|                            | 40+                                 | 1.06 (0.97-1.15)        | 1.08 (0.99-1.17) | 1.13 (1.04-1.23) | 1.12 (1.02-1.22) | 0.98 (0.85-1.13) | 1.23 (0.38-4.01) |
|                            | 30-34.9                             | 1.03 (1.01-1.05)        | 1.07 (1.05-1.08) | 1.09 (1.07-1.11) | 1.07 (1.05-1.09) | 1.08 (1.06-1.11) | 1.17 (0.96-1.44) |
|                            | 35-39.9                             | 1.03 (1.00-1.05)        | 1.05 (1.02-1.07) | 1.09 (1.06-1.12) | 1.08 (1.05-1.11) | 1.06 (1.02-1.11) | 1.49 (1.13-1.97) |
| Learning disability        | 0.98 (0.58-1.65)                    | 1.64 (1.05-2.55)        | 1.68 (1.07-2.64) | 1.84 (1.13-2.99) | -                | -                |                  |
| Serious mental illness     | 0.93 (0.81-1.07)                    | 1.02 (0.88-1.17)        | 0.93 (0.80-1.08) | 0.87 (0.74-1.03) | 1.03 (0.82-1.31) | -                |                  |
| Morbidity count            | 0                                   | 1.00                    | 1.00             | 1.00             | 1.00             | 1.00             | 1.00             |
|                            | 1                                   | 1.10 (1.04-1.17)        | 1.06 (1.00-1.13) | 0.90 (0.84-0.97) | 0.98 (0.91-1.06) | -                | -                |
|                            | 2+                                  | 0.97 (0.56-1.68)        | 1.69 (0.97-2.93) | 1.55 (0.95-2.53) | 1.40 (0.74-2.63) | -                | -                |
|                            | 1 / 2+                              | -                       | -                | -                | -                | 1.00 (0.89-1.12) | 0.94 (0.45-1.97) |
| Flu vaccine                |                                     | 0.94 (0.93-0.95)        | 0.96 (0.95-0.98) | 0.99 (0.98-1.00) | 1.01 (1.00-1.02) | 1.02 (1.00-1.04) | 1.16 (0.98-1.37) |
| Number of SARS-CoV-2 tests | 0                                   | 1.00                    | 1.00             | 1.00             | 1.00             | 1.00             | 1.00             |
|                            | 1                                   | 1.63 (1.61-1.65)        | 1.61 (1.60-1.63) | 1.61 (1.59-1.63) | 1.59 (1.57-1.61) | 1.61 (1.58-1.64) | 2.29 (1.95-2.68) |
|                            | 2                                   | 1.96 (1.94-1.99)        | 1.91 (1.88-1.94) | 1.92 (1.89-1.95) | 1.87 (1.84-1.90) | 1.99 (1.94-2.04) | 3.20 (2.62-3.91) |
|                            | 3+                                  | 3.21 (3.17-3.25)        | 3.15 (3.11-3.19) | 3.08 (3.04-3.12) | 2.96 (2.92-3.00) | 3.27 (3.20-3.33) | 5.63 (4.82-6.57) |
| Pregnancy                  |                                     | 2.00 (1.96-2.04)        | 1.83 (1.79-1.87) | 1.69 (1.65-1.73) | 1.47 (1.43-1.51) | 1.22 (1.17-1.28) | 1.00 (0.67-1.50) |

\* Estimates correspond to a 1-year increase in age (or age-squared as indicated) within the given age categories.

## **Waning vaccine effectiveness in risk- and sex-based subgroups**

This subsection provides additional results for the waning of vaccine effectiveness across eight subgroups: the four risk-based subgroups, each split into females and males. Supplementary Tables 51 and 52 give the event counts / person-years for each subgroup, outcome and comparison period for females and males respectively. Supplementary Tables 53 and 54 give the unadjusted hazard ratios for females and males respectively. Supplementary Tables 55 and 56 give the adjusted hazard ratios for females and males respectively. Supplementary Tables 57 and 58 give the per-comparison-period ratio of adjusted hazard ratios for females and males respectively. The adjusted hazard ratios are plotted in Supplementary Figures 32 and 33 for BNT162b2 vs unvaccinated and ChAdOx1 vs unvaccinated respectively. The adjusted hazard ratios with any SARS-CoV-2 test as the outcome are plotted in Supplementary Figures 34 and 35 for BNT162b2 vs unvaccinated and ChAdOx1 vs unvaccinated respectively.

Supplementary Table 51: Event counts / person-years (females only).

| Outcome                  | Weeks since 2nd dose | 65+ years         |                   |                 | 18-64 years and clinically vulnerable |                   |                 | 40-64 years <sup>a</sup> |                   |                 | 18-39 years <sup>a</sup> |                   |
|--------------------------|----------------------|-------------------|-------------------|-----------------|---------------------------------------|-------------------|-----------------|--------------------------|-------------------|-----------------|--------------------------|-------------------|
|                          |                      | BNT162b2          | ChAdOx1           | Unvaccinated    | BNT162b2                              | ChAdOx1           | Unvaccinated    | BNT162b2                 | ChAdOx1           | Unvaccinated    | BNT162b2                 | Unvaccinated      |
| COVID-19 hospitalisation | 3-6                  | 14 / 33,746       | 21 / 43,585       | 35 / 5,867      | 7 / 13,737                            | 21 / 25,281       | 105 / 11,806    | 7 / 2,451                | 21 / 53,074       | 224 / 19,641    | 14 / 25,737              | 497 / 46,208      |
|                          | 7-10                 | 14 / 33,799       | 35 / 43,520       | 56 / 5,459      | 21 / 13,718                           | 70 / 25,239       | 266 / 10,443    | 7 / 2,449                | 42 / 53,010       | 245 / 18,559    | 21 / 25,555              | 378 / 43,556      |
|                          | 11-14                | 56 / 33,736       | 133 / 43,444      | 105 / 5,171     | 28 / 13,700                           | 147 / 25,192      | 343 / 9,385     | 7 / 2,445                | 42 / 52,949       | 224 / 17,788    | 28 / 25,412              | 350 / 41,315      |
|                          | 15-18                | 119 / 33,663      | 238 / 43,358      | 161 / 5,018     | 56 / 13,676                           | 196 / 25,136      | 280 / 8,794     | 7 / 2,442                | 70 / 52,884       | 182 / 17,319    | 28 / 20,511              | 259 / 28,921      |
|                          | 19-22                | 161 / 33,583      | 322 / 43,267      | 168 / 4,853     | 56 / 13,646                           | 189 / 25,073      | 224 / 8,373     | 7 / 2,338                | 77 / 52,551       | 189 / 15,734    | 21 / 6,476               | 84 / 9,176        |
|                          | 23-26                | 217 / 33,477      | 329 / 43,130      | 175 / 4,765     | 49 / 13,573                           | 238 / 24,929      | 245 / 8,072     | 7 / 931                  | 98 / 44,833       | 147 / 10,619    | 0 / 25                   | 7 / 215           |
|                          | Total                | 581 / 202,004     | 1,078 / 260,304   | 700 / 31,133    | 217 / 82,050                          | 861 / 150,850     | 1,463 / 56,873  | 42 / 13,056              | 350 / 309,301     | 1,211 / 99,660  | 112 / 103,716            | 1,575 / 169,391   |
| COVID-19 death           | 3-6                  | 7 / 33,748        | 0 / 43,586        | 14 / 5,870      | 0 / 13,737                            | 0 / 25,282        | 7 / 11,811      | 0 / 2,451                | 0 / 53,075        | 7 / 19,655      | 0 / 25,738               | 7 / 46,274        |
|                          | 7-10                 | 7 / 33,801        | 7 / 43,522        | 14 / 5,464      | 7 / 13,719                            | 7 / 25,243        | 14 / 10,461     | 0 / 2,449                | 0 / 53,013        | 7 / 18,590      | 0 / 25,558               | 7 / 43,649        |
|                          | 11-14                | 7 / 33,739        | 14 / 43,452       | 21 / 5,180      | 0 / 13,702                            | 7 / 25,203        | 21 / 9,422      | 0 / 2,446                | 7 / 52,955        | 14 / 17,837     | 0 / 25,416               | 7 / 41,428        |
|                          | 15-18                | 14 / 33,672       | 35 / 43,379       | 28 / 5,034      | 7 / 13,681                            | 14 / 25,160       | 42 / 8,854      | 0 / 2,443                | 7 / 52,894        | 7 / 17,377      | 0 / 20,516               | 0 / 29,020        |
|                          | 19-22                | 21 / 33,600       | 56 / 43,307       | 49 / 4,879      | 7 / 13,655                            | 21 / 25,110       | 28 / 8,448      | 0 / 2,339                | 7 / 52,567        | 7 / 15,801      | 0 / 6,478                | 7 / 9,210         |
|                          | 23-26                | 35 / 33,507       | 56 / 43,189       | 42 / 4,799      | 7 / 13,586                            | 21 / 24,981       | 21 / 8,158      | 0 / 931                  | 7 / 44,851        | 7 / 10,666      | 0 / 25                   | 0 / 216           |
|                          | Total                | 91 / 202,067      | 168 / 260,435     | 168 / 31,226    | 21 / 82,080                           | 70 / 150,979      | 133 / 57,154    | 0 / 13,059               | 28 / 309,355      | 49 / 99,926     | 0 / 103,731              | 28 / 169,797      |
| Positive SARS-CoV-2 test | 3-6                  | 56 / 33,742       | 133 / 43,576      | 63 / 5,864      | 70 / 13,731                           | 777 / 25,249      | 910 / 11,766    | 133 / 2,438              | 4,130 / 52,818    | 2,933 / 19,402  | 1,477 / 25,518           | 8,981 / 44,958    |
|                          | 7-10                 | 140 / 33,789      | 560 / 43,491      | 119 / 5,453     | 700 / 13,690                          | 2,884 / 25,074    | 1,925 / 10,312  | 217 / 2,422              | 6,230 / 52,342    | 3,017 / 18,131  | 2,359 / 25,197           | 7,777 / 41,813    |
|                          | 11-14                | 504 / 33,705      | 1,589 / 43,342    | 238 / 5,158     | 1,211 / 13,597                        | 4,102 / 24,766    | 2,303 / 9,128   | 399 / 2,398              | 8,540 / 51,739    | 2,926 / 17,159  | 4,200 / 24,817           | 9,030 / 39,051    |
|                          | 15-18                | 1,050 / 33,582    | 2,548 / 43,114    | 301 / 4,996     | 1,603 / 13,468                        | 4,627 / 24,380    | 1,883 / 8,415   | 595 / 2,355              | 10,136 / 50,950   | 2,961 / 16,521  | 6,671 / 19,701           | 7,490 / 26,986    |
|                          | 19-22                | 1,505 / 33,412    | 3,213 / 42,818    | 308 / 4,820     | 1,813 / 13,317                        | 5,551 / 23,959    | 1,652 / 7,906   | 756 / 2,211              | 13,762 / 49,772   | 2,933 / 14,844  | 3,409 / 6,052            | 2,751 / 8,429     |
|                          | 23-26                | 1,946 / 33,195    | 4,333 / 42,435    | 329 / 4,724     | 2,674 / 13,076                        | 7,084 / 23,347    | 1,848 / 7,513   | 238 / 887                | 12,817 / 42,040   | 2,121 / 10,017  | 28 / 23                  | 98 / 196          |
|                          | Total                | 5,201 / 201,425   | 12,376 / 258,776  | 1,358 / 31,015  | 8,071 / 80,879                        | 25,025 / 146,775  | 10,521 / 55,040 | 2,338 / 12,711           | 55,615 / 299,661  | 16,891 / 96,074 | 18,144 / 101,308         | 36,127 / 161,433  |
| Non-COVID-19 death       | 3-6                  | 336 / 33,748      | 343 / 43,586      | 168 / 5,870     | 42 / 13,737                           | 70 / 25,282       | 56 / 11,811     | 7 / 2,451                | 21 / 53,075       | 28 / 19,655     | 7 / 25,738               | 7 / 46,274        |
|                          | 7-10                 | 455 / 33,801      | 427 / 43,522      | 154 / 5,464     | 49 / 13,719                           | 112 / 25,243      | 70 / 10,461     | 0 / 2,449                | 35 / 53,013       | 28 / 18,590     | 0 / 25,558               | 7 / 43,649        |
|                          | 11-14                | 546 / 33,739      | 483 / 43,452      | 147 / 5,180     | 56 / 13,702                           | 119 / 25,203      | 56 / 9,422      | 7 / 2,446                | 49 / 52,955       | 21 / 17,837     | 0 / 25,416               | 7 / 41,428        |
|                          | 15-18                | 602 / 33,672      | 525 / 43,379      | 147 / 5,034     | 63 / 13,681                           | 126 / 25,160      | 49 / 8,854      | 7 / 2,443                | 56 / 52,894       | 28 / 17,377     | 0 / 20,516               | 7 / 29,020        |
|                          | 19-22                | 630 / 33,600      | 511 / 43,307      | 147 / 4,879     | 56 / 13,655                           | 119 / 25,110      | 42 / 8,448      | 7 / 2,339                | 63 / 52,567       | 35 / 15,801     | 0 / 6,478                | 7 / 9,210         |
|                          | 23-26                | 700 / 33,507      | 574 / 43,189      | 126 / 4,799     | 70 / 13,586                           | 126 / 24,981      | 35 / 8,158      | 7 / 931                  | 63 / 44,851       | 21 / 10,666     | 0 / 25                   | 0 / 216           |
|                          | Total                | 3,269 / 202,067   | 2,863 / 260,435   | 889 / 31,226    | 336 / 82,080                          | 672 / 150,979     | 308 / 57,154    | 35 / 13,059              | 287 / 309,355     | 161 / 99,926    | 7 / 103,731              | 35 / 169,797      |
| Any SARS-CoV-2 test      | 3-6                  | 33,544 / 32,291   | 51,625 / 41,228   | 3,248 / 5,586   | 27,335 / 12,366                       | 54,222 / 22,599   | 12,411 / 10,742 | 5,292 / 2,192            | 133,273 / 46,221  | 18,557 / 17,949 | 64,967 / 22,811          | 56,756 / 40,793   |
|                          | 7-10                 | 37,646 / 32,113   | 57,260 / 40,914   | 3,199 / 5,183   | 33,243 / 12,130                       | 62,951 / 22,105   | 12,565 / 9,348  | 6,209 / 2,150            | 134,939 / 45,926  | 18,452 / 16,717 | 66,640 / 22,291          | 48,643 / 38,095   |
|                          | 11-14                | 41,293 / 31,866   | 61,537 / 40,549   | 3,101 / 4,904   | 30,919 / 12,122                       | 57,512 / 22,190   | 11,767 / 8,274  | 6,580 / 2,102            | 134,540 / 45,819  | 17,507 / 15,798 | 65,338 / 22,083          | 44,058 / 36,043   |
|                          | 15-18                | 41,391 / 31,754   | 60,725 / 40,440   | 3,115 / 4,750   | 31,647 / 12,117                       | 61,383 / 21,763   | 10,836 / 7,618  | 6,741 / 2,058            | 146,706 / 44,208  | 16,478 / 15,254 | 65,065 / 17,509          | 34,440 / 25,358   |
|                          | 19-22                | 44,373 / 31,530   | 67,424 / 39,930   | 3,080 / 4,577   | 34,895 / 11,745                       | 65,625 / 21,103   | 9,975 / 7,139   | 7,091 / 1,926            | 149,471 / 43,141  | 14,973 / 13,814 | 30,793 / 5,353           | 13,377 / 8,119    |
|                          | 23-26                | 48,594 / 31,137   | 73,325 / 39,331   | 3,108 / 4,473   | 35,413 / 11,501                       | 64,743 / 20,573   | 9,107 / 6,851   | 3,276 / 789              | 133,035 / 36,671  | 11,102 / 9,445  | 259 / 22                 | 532 / 195         |
|                          | Total                | 246,841 / 190,691 | 371,896 / 242,392 | 18,851 / 29,473 | 193,452 / 71,981                      | 366,436 / 130,333 | 66,661 / 49,972 | 35,189 / 11,217          | 831,964 / 261,986 | 97,069 / 88,977 | 293,062 / 90,069         | 197,806 / 148,603 |

<sup>a</sup> And not clinically vulnerable



**Supplementary Table 52: Event counts / person-years (males only).**

| Outcome                  | Weeks since 2nd dose | 65+ years         |                   |                 | 18-64 years and clinically vulnerable |                   |                 | 40-64 years <sup>a</sup> |                   |                  | 18-39 years <sup>a</sup> |                   |
|--------------------------|----------------------|-------------------|-------------------|-----------------|---------------------------------------|-------------------|-----------------|--------------------------|-------------------|------------------|--------------------------|-------------------|
|                          |                      | BNT162b2          | ChAdOx1           | Unvaccinated    | BNT162b2                              | ChAdOx1           | Unvaccinated    | BNT162b2                 | ChAdOx1           | Unvaccinated     | BNT162b2                 | Unvaccinated      |
| COVID-19 hospitalisation | 3-6                  | 21 / 29,925       | 28 / 40,503       | 49 / 5,068      | 7 / 14,532                            | 14 / 24,481       | 70 / 11,160     | 0 / 2,380                | 42 / 59,894       | 315 / 28,147     | 7 / 26,977               | 252 / 56,866      |
|                          | 7-10                 | 28 / 29,948       | 63 / 40,428       | 63 / 4,732      | 14 / 14,510                           | 91 / 24,437       | 196 / 10,098    | 0 / 2,377                | 77 / 59,817       | 350 / 26,541     | 7 / 26,826               | 182 / 54,530      |
|                          | 11-14                | 70 / 29,874       | 203 / 40,340      | 98 / 4,454      | 42 / 14,486                           | 154 / 24,386      | 259 / 9,194     | 7 / 2,373                | 77 / 59,741       | 336 / 25,952     | 14 / 26,691              | 189 / 52,545      |
|                          | 15-18                | 189 / 29,786      | 357 / 40,233      | 161 / 4,340     | 56 / 14,459                           | 210 / 24,329      | 224 / 8,666     | 0 / 2,369                | 105 / 59,662      | 322 / 25,137     | 14 / 21,020              | 161 / 38,034      |
|                          | 19-22                | 252 / 29,691      | 434 / 40,115      | 161 / 4,175     | 49 / 14,428                           | 203 / 24,262      | 203 / 8,411     | 0 / 2,259                | 133 / 59,226      | 322 / 23,124     | 7 / 6,359                | 63 / 12,740       |
|                          | 23-26                | 364 / 29,570      | 511 / 39,958      | 161 / 4,119     | 84 / 14,349                           | 266 / 24,105      | 210 / 8,149     | 0 / 864                  | 161 / 50,022      | 238 / 14,812     | 0 / 25                   | 7 / 339           |
|                          | Total                | 924 / 178,794     | 1,596 / 241,577   | 693 / 26,888    | 252 / 86,764                          | 938 / 146,000     | 1,162 / 55,678  | 7 / 12,622               | 595 / 348,362     | 1,883 / 143,713  | 49 / 107,898             | 854 / 215,054     |
| COVID-19 death           | 3-6                  | 7 / 29,927        | 7 / 40,504        | 14 / 5,072      | 0 / 14,533                            | 7 / 24,481        | 14 / 11,165     | 0 / 2,380                | 7 / 59,898        | 14 / 28,170      | 0 / 26,978               | 7 / 56,902        |
|                          | 7-10                 | 7 / 29,951        | 7 / 40,432        | 14 / 4,738      | 0 / 14,511                            | 7 / 24,440        | 21 / 10,111     | 0 / 2,377                | 7 / 59,825        | 21 / 26,588      | 0 / 26,827               | 14 / 54,583       |
|                          | 11-14                | 14 / 29,879       | 28 / 40,353       | 35 / 4,463      | 7 / 14,489                            | 21 / 24,399       | 42 / 9,222      | 0 / 2,373                | 7 / 59,755        | 21 / 26,021      | 0 / 26,693               | 7 / 52,605        |
|                          | 15-18                | 28 / 29,799       | 56 / 40,263       | 35 / 4,357      | 7 / 14,465                            | 21 / 24,354       | 35 / 8,710      | 0 / 2,369                | 7 / 59,682        | 28 / 25,225      | 0 / 21,022               | 7 / 38,091        |
|                          | 19-22                | 77 / 29,717       | 84 / 40,173       | 49 / 4,198      | 14 / 14,437                           | 21 / 24,301       | 42 / 8,463      | 0 / 2,259                | 7 / 59,255        | 35 / 23,222      | 0 / 6,359                | 7 / 12,764        |
|                          | 23-26                | 77 / 29,613       | 77 / 40,043       | 56 / 4,151      | 7 / 14,362                            | 28 / 24,159       | 35 / 8,216      | 0 / 864                  | 14 / 50,055       | 21 / 14,893      | 0 / 25                   | 0 / 340           |
|                          | Total                | 210 / 178,886     | 259 / 241,768     | 203 / 26,979    | 35 / 86,797                           | 105 / 146,134     | 189 / 55,887    | 0 / 12,622               | 49 / 348,470      | 140 / 144,119    | 0 / 107,904              | 42 / 215,285      |
| Positive SARS-CoV-2 test | 3-6                  | 56 / 29,921       | 119 / 40,494      | 70 / 5,065      | 77 / 14,528                           | 623 / 24,457      | 651 / 11,134    | 91 / 2,367               | 4,767 / 59,594    | 2,947 / 27,908   | 1,211 / 26,741           | 7,350 / 55,737    |
|                          | 7-10                 | 182 / 29,938      | 637 / 40,400      | 119 / 4,728     | 721 / 14,484                          | 2,604 / 24,297    | 1,393 / 10,005  | 168 / 2,353              | 7,175 / 59,042    | 2,884 / 26,129   | 1,694 / 26,482           | 6,006 / 52,983    |
|                          | 11-14                | 581 / 29,840      | 1,792 / 40,231    | 182 / 4,445     | 1,155 / 14,385                        | 3,577 / 24,016    | 1,575 / 9,013   | 301 / 2,333              | 8,862 / 58,383    | 2,751 / 25,365   | 3,017 / 26,179           | 7,112 / 50,623    |
|                          | 15-18                | 1,232 / 29,695    | 2,863 / 39,968    | 287 / 4,322     | 1,498 / 14,259                        | 3,668 / 23,688    | 1,162 / 8,418   | 406 / 2,302              | 10,220 / 57,570   | 2,793 / 24,398   | 4,998 / 20,380           | 5,992 / 36,397    |
|                          | 19-22                | 1,568 / 29,508    | 3,220 / 39,644    | 266 / 4,154     | 1,519 / 14,120                        | 4,249 / 23,352    | 1,036 / 8,107   | 609 / 2,161              | 14,469 / 56,265   | 2,912 / 22,300   | 2,786 / 6,037            | 2,331 / 12,126    |
|                          | 23-26                | 2,177 / 29,273    | 4,466 / 39,249    | 287 / 4,085     | 2,436 / 13,897                        | 5,649 / 22,832    | 1,113 / 7,796   | 175 / 829                | 14,196 / 46,950   | 2,107 / 14,261   | 14 / 23                  | 63 / 321          |
|                          | Total                | 5,796 / 178,175   | 13,097 / 239,986  | 1,211 / 26,799  | 7,406 / 85,673                        | 20,370 / 142,642  | 6,930 / 54,473  | 1,750 / 12,345           | 59,689 / 337,804  | 16,394 / 140,361 | 13,720 / 105,842         | 28,854 / 208,187  |
| Non-COVID-19 death       | 3-6                  | 518 / 29,927      | 469 / 40,504      | 189 / 5,072     | 91 / 14,533                           | 126 / 24,481      | 91 / 11,165     | 7 / 2,380                | 70 / 59,898       | 70 / 28,170      | 7 / 26,978               | 14 / 56,902       |
|                          | 7-10                 | 644 / 29,951      | 546 / 40,432      | 133 / 4,738     | 84 / 14,511                           | 140 / 24,440      | 98 / 10,111     | 7 / 2,377                | 77 / 59,825       | 56 / 26,588      | 7 / 26,827               | 21 / 54,583       |
|                          | 11-14                | 742 / 29,879      | 665 / 40,353      | 119 / 4,463     | 84 / 14,489                           | 161 / 24,399      | 91 / 9,222      | 7 / 2,373                | 77 / 59,755       | 56 / 26,021      | 7 / 26,693               | 21 / 52,605       |
|                          | 15-18                | 735 / 29,799      | 721 / 40,263      | 154 / 4,357     | 91 / 14,465                           | 182 / 24,354      | 63 / 8,710      | 7 / 2,369                | 105 / 59,682      | 42 / 25,225      | 7 / 21,022               | 14 / 38,091       |
|                          | 19-22                | 770 / 29,717      | 672 / 40,173      | 112 / 4,198     | 91 / 14,437                           | 175 / 24,301      | 84 / 8,463      | 7 / 2,259                | 105 / 59,255      | 42 / 23,222      | 0 / 6,359                | 7 / 12,764        |
|                          | 23-26                | 861 / 29,613      | 784 / 40,043      | 133 / 4,151     | 112 / 14,362                          | 182 / 24,159      | 63 / 8,216      | 0 / 864                  | 98 / 50,055       | 35 / 14,893      | 0 / 25                   | 0 / 340           |
|                          | Total                | 4,270 / 178,886   | 3,857 / 241,768   | 840 / 26,979    | 553 / 86,797                          | 966 / 146,134     | 490 / 55,887    | 35 / 12,622              | 532 / 348,470     | 301 / 144,119    | 28 / 107,904             | 77 / 215,285      |
| Any SARS-CoV-2 test      | 3-6                  | 31,766 / 28,558   | 48,272 / 38,334   | 2,695 / 4,844   | 20,342 / 13,578                       | 36,918 / 22,790   | 7,525 / 10,559  | 3,843 / 2,199            | 108,066 / 54,820  | 16,436 / 26,763  | 51,975 / 24,608          | 43,057 / 52,661   |
|                          | 7-10                 | 35,532 / 28,376   | 53,781 / 38,016   | 2,506 / 4,526   | 25,977 / 13,356                       | 45,171 / 22,329   | 7,903 / 9,452   | 4,382 / 2,169            | 114,415 / 53,990  | 15,897 / 25,012  | 50,722 / 24,356          | 35,756 / 50,327   |
|                          | 11-14                | 39,172 / 28,115   | 58,821 / 37,601   | 2,520 / 4,245   | 25,599 / 13,222                       | 44,100 / 22,134   | 7,805 / 8,473   | 4,522 / 2,147            | 115,696 / 53,556  | 15,533 / 24,259  | 49,189 / 24,191          | 33,621 / 48,409   |
|                          | 15-18                | 38,808 / 27,993   | 57,750 / 37,467   | 2,646 / 4,121   | 26,110 / 13,164                       | 45,871 / 21,795   | 6,972 / 7,916   | 4,732 / 2,109            | 127,260 / 52,206  | 14,476 / 23,367  | 48,804 / 18,805          | 26,390 / 35,217   |
|                          | 19-22                | 41,573 / 27,754   | 63,973 / 36,956   | 2,499 / 3,958   | 28,721 / 12,890                       | 48,972 / 21,330   | 6,741 / 7,595   | 5,159 / 1,973            | 132,433 / 50,912  | 13,797 / 21,424  | 23,198 / 5,528           | 10,500 / 11,888   |
|                          | 23-26                | 45,822 / 27,351   | 69,888 / 36,349   | 2,506 / 3,891   | 29,365 / 12,654                       | 48,657 / 20,846   | 6,216 / 7,338   | 2,240 / 762              | 117,537 / 42,641  | 9,856 / 13,801   | 154 / 22                 | 364 / 320         |
|                          | Total                | 232,673 / 168,147 | 352,485 / 224,723 | 15,372 / 25,585 | 156,114 / 78,864                      | 269,689 / 131,224 | 43,162 / 51,333 | 24,878 / 11,359          | 715,407 / 308,125 | 85,995 / 134,626 | 224,042 / 97,510         | 149,688 / 198,822 |

<sup>a</sup> And not clinically vulnerable

**Supplementary Table 53: Unadjusted hazard ratios for effect of vaccination (female-only model).**

| Outcome                  | Weeks since 2nd dose | 65+ years                |                         |                     | 18-64 years and clinically vulnerable |                         |                     | 40-64 years <sup>a</sup> |                         |                     | 18-39 years <sup>a</sup> |
|--------------------------|----------------------|--------------------------|-------------------------|---------------------|---------------------------------------|-------------------------|---------------------|--------------------------|-------------------------|---------------------|--------------------------|
|                          |                      | BNT162b2 vs unvaccinated | ChAdOx1 vs unvaccinated | BNT162b2 vs ChAdOx1 | BNT162b2 vs unvaccinated              | ChAdOx1 vs unvaccinated | BNT162b2 vs ChAdOx1 | BNT162b2 vs unvaccinated | ChAdOx1 vs unvaccinated | BNT162b2 vs ChAdOx1 | BNT162b2 vs unvaccinated |
| COVID-19 hospitalisation | 3-6                  | 0.08 (0.04-0.17)         | 0.15 (0.06-0.34)        | 0.65 (0.23-1.84)    | -                                     | 0.10 (0.06-0.18)        | -                   | -                        | 0.04 (0.02-0.06)        | -                   | 0.03 (0.01-0.06)         |
|                          | 7-10                 | 0.04 (0.02-0.10)         | 0.06 (0.04-0.09)        | 0.46 (0.22-0.95)    | 0.05 (0.03-0.09)                      | 0.11 (0.08-0.14)        | 0.50 (0.26-0.94)    | -                        | 0.05 (0.03-0.07)        | -                   | 0.10 (0.06-0.15)         |
|                          | 11-14                | 0.10 (0.07-0.14)         | 0.12 (0.09-0.16)        | 0.52 (0.36-0.74)    | 0.05 (0.03-0.07)                      | 0.14 (0.11-0.17)        | 0.35 (0.23-0.54)    | -                        | 0.05 (0.04-0.07)        | -                   | 0.12 (0.08-0.18)         |
|                          | 15-18                | 0.10 (0.07-0.13)         | 0.15 (0.12-0.19)        | 0.57 (0.45-0.73)    | 0.10 (0.07-0.13)                      | 0.21 (0.17-0.25)        | 0.49 (0.35-0.67)    | -                        | 0.13 (0.09-0.17)        | -                   | 0.11 (0.07-0.18)         |
|                          | 19-22                | 0.11 (0.09-0.15)         | 0.20 (0.16-0.25)        | 0.55 (0.45-0.68)    | 0.13 (0.10-0.18)                      | 0.24 (0.20-0.30)        | 0.60 (0.43-0.83)    | -                        | 0.13 (0.09-0.18)        | -                   | 0.22 (0.12-0.39)         |
|                          | 23-26                | 0.16 (0.13-0.20)         | 0.22 (0.18-0.28)        | 0.64 (0.52-0.79)    | 0.11 (0.08-0.16)                      | 0.29 (0.24-0.34)        | 0.37 (0.27-0.50)    | -                        | 0.14 (0.11-0.19)        | -                   | -                        |
| COVID-19 death           | 3-6                  | -                        | -                       | -                   | -                                     | -                       | -                   | -                        | -                       | -                   | -                        |
|                          | 7-10                 | -                        | -                       | -                   | -                                     | -                       | -                   | -                        | -                       | -                   | -                        |
|                          | 11-14                | -                        | 0.04 (0.02-0.12)        | -                   | -                                     | 0.09 (0.03-0.27)        | -                   | -                        | -                       | -                   | -                        |
|                          | 15-18                | 0.05 (0.02-0.11)         | 0.11 (0.05-0.21)        | 0.31 (0.13-0.77)    | 0.10 (0.04-0.26)                      | 0.12 (0.06-0.23)        | 0.99 (0.37-2.70)    | -                        | -                       | -                   | -                        |
|                          | 19-22                | 0.05 (0.03-0.09)         | 0.10 (0.06-0.16)        | 0.49 (0.29-0.82)    | 0.12 (0.05-0.29)                      | 0.19 (0.10-0.38)        | 0.84 (0.30-2.35)    | -                        | 0.09 (0.03-0.27)        | -                   | -                        |
|                          | 23-26                | 0.12 (0.07-0.19)         | 0.16 (0.10-0.27)        | 0.43 (0.28-0.67)    | 0.33 (0.11-0.99)                      | 0.33 (0.16-0.68)        | 0.86 (0.34-2.22)    | -                        | 0.12 (0.03-0.48)        | -                   | -                        |
| Positive SARS-CoV-2 test | 3-6                  | 0.25 (0.16-0.41)         | 0.60 (0.41-0.88)        | 0.64 (0.44-0.92)    | 0.14 (0.11-0.19)                      | 0.57 (0.51-0.63)        | 0.28 (0.22-0.37)    | 0.31 (0.26-0.37)         | 0.76 (0.72-0.80)        | 0.41 (0.35-0.49)    | 0.28 (0.26-0.29)         |
|                          | 7-10                 | 0.36 (0.27-0.48)         | 0.74 (0.58-0.94)        | 0.51 (0.42-0.62)    | 0.28 (0.26-0.31)                      | 0.59 (0.56-0.63)        | 0.49 (0.45-0.53)    | 0.49 (0.42-0.56)         | 0.87 (0.82-0.91)        | 0.51 (0.45-0.59)    | 0.49 (0.47-0.51)         |
|                          | 11-14                | 0.42 (0.35-0.50)         | 0.70 (0.60-0.82)        | 0.61 (0.55-0.68)    | 0.34 (0.31-0.37)                      | 0.65 (0.61-0.69)        | 0.57 (0.53-0.61)    | 0.81 (0.73-0.91)         | 1.27 (1.21-1.33)        | 0.55 (0.50-0.61)    | 0.69 (0.66-0.71)         |
|                          | 15-18                | 0.59 (0.50-0.68)         | 0.88 (0.77-1.00)        | 0.68 (0.63-0.73)    | 0.47 (0.43-0.50)                      | 0.83 (0.79-0.88)        | 0.60 (0.57-0.64)    | 1.13 (1.02-1.24)         | 1.60 (1.53-1.68)        | 0.67 (0.61-0.73)    | 1.12 (1.08-1.16)         |
|                          | 19-22                | 0.67 (0.58-0.77)         | 1.12 (0.98-1.28)        | 0.70 (0.65-0.75)    | 0.74 (0.68-0.80)                      | 1.13 (1.06-1.20)        | 0.65 (0.62-0.69)    | 1.32 (1.21-1.45)         | 1.84 (1.76-1.92)        | 0.67 (0.62-0.72)    | 1.61 (1.52-1.70)         |
|                          | 23-26                | 0.96 (0.84-1.09)         | 1.52 (1.34-1.73)        | 0.72 (0.68-0.76)    | 0.78 (0.73-0.84)                      | 1.22 (1.16-1.29)        | 0.66 (0.63-0.69)    | 1.25 (1.08-1.46)         | 1.90 (1.80-2.00)        | 0.64 (0.56-0.73)    | 2.65 (1.59-4.39)         |
| Non-COVID-19 death       | 3-6                  | 0.28 (0.22-0.34)         | 0.50 (0.38-0.66)        | 0.65 (0.53-0.81)    | 0.63 (0.40-0.98)                      | 0.53 (0.36-0.79)        | 1.22 (0.81-1.85)    | -                        | 0.28 (0.14-0.56)        | -                   | -                        |
|                          | 7-10                 | 0.37 (0.30-0.45)         | 0.54 (0.40-0.71)        | 0.70 (0.59-0.84)    | 0.40 (0.26-0.61)                      | 0.48 (0.34-0.67)        | 0.91 (0.64-1.30)    | -                        | 0.22 (0.12-0.40)        | -                   | -                        |
|                          | 11-14                | 0.47 (0.38-0.58)         | 0.55 (0.43-0.70)        | 0.81 (0.69-0.94)    | 0.56 (0.38-0.84)                      | 0.66 (0.47-0.94)        | 0.96 (0.69-1.33)    | -                        | 0.79 (0.45-1.39)        | -                   | -                        |
|                          | 15-18                | 0.49 (0.40-0.61)         | 0.70 (0.54-0.90)        | 0.81 (0.70-0.94)    | 0.74 (0.50-1.10)                      | 0.81 (0.55-1.17)        | 0.90 (0.65-1.25)    | -                        | 0.42 (0.25-0.71)        | -                   | -                        |
|                          | 19-22                | 0.49 (0.40-0.61)         | 0.59 (0.46-0.77)        | 0.89 (0.77-1.03)    | 0.71 (0.43-1.16)                      | 0.83 (0.55-1.27)        | 0.93 (0.65-1.32)    | -                        | 0.41 (0.23-0.71)        | -                   | -                        |
|                          | 23-26                | 0.58 (0.47-0.71)         | 0.72 (0.56-0.93)        | 0.81 (0.71-0.93)    | 0.97 (0.62-1.52)                      | 1.10 (0.72-1.67)        | 1.01 (0.74-1.37)    | -                        | 0.45 (0.26-0.77)        | -                   | -                        |
| Any SARS-CoV-2 test      | 3-6                  | 2.05 (1.97-2.14)         | 2.85 (2.73-2.97)        | 0.84 (0.83-0.85)    | 2.20 (2.15-2.26)                      | 2.47 (2.42-2.53)        | 0.76 (0.75-0.77)    | 2.67 (2.57-2.77)         | 3.49 (3.43-3.55)        | 0.93 (0.90-0.95)    | 2.09 (2.06-2.11)         |
|                          | 7-10                 | 2.31 (2.22-2.41)         | 2.92 (2.80-3.05)        | 0.85 (0.84-0.86)    | 2.01 (1.96-2.05)                      | 2.26 (2.22-2.31)        | 0.77 (0.76-0.78)    | 2.58 (2.50-2.67)         | 3.13 (3.08-3.19)        | 0.89 (0.87-0.92)    | 2.41 (2.38-2.44)         |
|                          | 11-14                | 2.39 (2.29-2.49)         | 2.90 (2.78-3.02)        | 0.86 (0.85-0.87)    | 1.90 (1.85-1.94)                      | 2.09 (2.04-2.13)        | 0.82 (0.81-0.83)    | 2.97 (2.87-3.07)         | 3.25 (3.19-3.31)        | 0.93 (0.91-0.96)    | 2.51 (2.47-2.54)         |
|                          | 15-18                | 2.38 (2.29-2.48)         | 2.93 (2.81-3.05)        | 0.86 (0.85-0.87)    | 1.82 (1.77-1.86)                      | 2.09 (2.04-2.13)        | 0.82 (0.81-0.83)    | 3.26 (3.15-3.37)         | 3.65 (3.59-3.72)        | 0.94 (0.91-0.96)    | 2.84 (2.80-2.88)         |
|                          | 19-22                | 2.44 (2.34-2.54)         | 3.09 (2.96-3.22)        | 0.86 (0.85-0.87)    | 2.11 (2.06-2.17)                      | 2.39 (2.34-2.44)        | 0.81 (0.80-0.82)    | 3.41 (3.29-3.53)         | 3.88 (3.81-3.95)        | 0.92 (0.90-0.95)    | 3.86 (3.78-3.95)         |
|                          | 23-26                | 2.60 (2.49-2.70)         | 3.22 (3.09-3.36)        | 0.88 (0.87-0.89)    | 2.30 (2.24-2.36)                      | 2.56 (2.50-2.62)        | 0.81 (0.80-0.83)    | 3.95 (3.77-4.14)         | 4.42 (4.33-4.51)        | 0.86 (0.82-0.89)    | 5.19 (4.42-6.11)         |

<sup>a</sup> And not clinically vulnerable

**Supplementary Table 54: Unadjusted hazard ratios for effect of vaccination (male-only model).**

| Outcome                  | Weeks since 2nd dose | 65+ years                |                         |                     | 18-64 years and clinically vulnerable |                         |                     | 40-64 years <sup>a</sup> |                         |                     | 18-39 years <sup>a</sup> |
|--------------------------|----------------------|--------------------------|-------------------------|---------------------|---------------------------------------|-------------------------|---------------------|--------------------------|-------------------------|---------------------|--------------------------|
|                          |                      | BNT162b2 vs unvaccinated | ChAdOx1 vs unvaccinated | BNT162b2 vs ChAdOx1 | BNT162b2 vs unvaccinated              | ChAdOx1 vs unvaccinated | BNT162b2 vs ChAdOx1 | BNT162b2 vs unvaccinated | ChAdOx1 vs unvaccinated | BNT162b2 vs ChAdOx1 | BNT162b2 vs unvaccinated |
| COVID-19 hospitalisation | 3-6                  | 0.06 (0.03-0.12)         | 0.12 (0.07-0.20)        | 0.48 (0.24-0.95)    | 0.07 (0.02-0.26)                      | 0.10 (0.05-0.19)        | 1.02 (0.19-5.47)    | -                        | 0.07 (0.05-0.10)        | -                   | 0.06 (0.03-0.12)         |
|                          | 7-10                 | 0.08 (0.05-0.15)         | 0.14 (0.09-0.22)        | 0.54 (0.31-0.94)    | 0.05 (0.03-0.10)                      | 0.18 (0.14-0.23)        | 0.29 (0.16-0.52)    | -                        | 0.06 (0.05-0.09)        | -                   | 0.06 (0.02-0.15)         |
|                          | 11-14                | 0.11 (0.08-0.15)         | 0.19 (0.14-0.25)        | 0.58 (0.43-0.77)    | 0.08 (0.06-0.12)                      | 0.21 (0.17-0.26)        | 0.41 (0.28-0.60)    | -                        | 0.06 (0.05-0.08)        | -                   | 0.09 (0.05-0.18)         |
|                          | 15-18                | 0.16 (0.12-0.20)         | 0.20 (0.16-0.25)        | 0.66 (0.54-0.81)    | 0.11 (0.08-0.15)                      | 0.29 (0.23-0.36)        | 0.41 (0.29-0.57)    | -                        | 0.12 (0.09-0.15)        | -                   | 0.09 (0.04-0.17)         |
|                          | 19-22                | 0.19 (0.15-0.25)         | 0.26 (0.21-0.32)        | 0.58 (0.48-0.69)    | 0.12 (0.08-0.16)                      | 0.31 (0.25-0.38)        | 0.47 (0.33-0.66)    | -                        | 0.12 (0.10-0.15)        | -                   | 0.13 (0.06-0.32)         |
|                          | 23-26                | 0.28 (0.22-0.35)         | 0.35 (0.28-0.43)        | 0.72 (0.62-0.85)    | 0.20 (0.15-0.27)                      | 0.37 (0.31-0.45)        | 0.60 (0.47-0.78)    | -                        | 0.17 (0.13-0.21)        | -                   | -                        |
| COVID-19 death           | 3-6                  | 0.03 (0.01-0.10)         | -                       | -                   | -                                     | -                       | -                   | -                        | -                       | -                   | -                        |
|                          | 7-10                 | -                        | 0.05 (0.02-0.16)        | -                   | -                                     | -                       | -                   | -                        | -                       | -                   | -                        |
|                          | 11-14                | 0.05 (0.02-0.12)         | 0.08 (0.05-0.14)        | 0.63 (0.30-1.33)    | -                                     | 0.13 (0.07-0.23)        | -                   | -                        | 0.03 (0.01-0.09)        | -                   | -                        |
|                          | 15-18                | 0.12 (0.07-0.22)         | 0.14 (0.08-0.24)        | 0.77 (0.44-1.35)    | -                                     | 0.18 (0.09-0.35)        | -                   | -                        | 0.04 (0.02-0.11)        | -                   | -                        |
|                          | 19-22                | 0.16 (0.10-0.24)         | 0.14 (0.09-0.22)        | 0.77 (0.53-1.12)    | 0.19 (0.08-0.45)                      | 0.16 (0.09-0.30)        | 1.10 (0.47-2.60)    | -                        | 0.04 (0.02-0.10)        | -                   | -                        |
|                          | 23-26                | 0.14 (0.09-0.21)         | 0.20 (0.13-0.31)        | 0.79 (0.54-1.16)    | 0.12 (0.05-0.31)                      | 0.24 (0.14-0.42)        | 0.42 (0.16-1.07)    | -                        | 0.10 (0.04-0.24)        | -                   | -                        |
| Positive SARS-CoV-2 test | 3-6                  | 0.16 (0.11-0.25)         | 0.43 (0.30-0.64)        | 0.72 (0.50-1.03)    | 0.21 (0.16-0.28)                      | 0.67 (0.59-0.76)        | 0.39 (0.30-0.50)    | 0.33 (0.27-0.41)         | 1.06 (1.00-1.11)        | 0.32 (0.26-0.39)    | 0.34 (0.32-0.36)         |
|                          | 7-10                 | 0.43 (0.33-0.57)         | 0.79 (0.63-0.98)        | 0.59 (0.49-0.70)    | 0.35 (0.32-0.39)                      | 0.72 (0.67-0.77)        | 0.51 (0.47-0.56)    | 0.61 (0.52-0.72)         | 1.25 (1.19-1.32)        | 0.46 (0.39-0.53)    | 0.56 (0.53-0.59)         |
|                          | 11-14                | 0.57 (0.47-0.70)         | 0.98 (0.82-1.17)        | 0.62 (0.56-0.68)    | 0.44 (0.40-0.48)                      | 0.86 (0.81-0.92)        | 0.56 (0.52-0.60)    | 1.02 (0.89-1.16)         | 1.62 (1.53-1.70)        | 0.57 (0.51-0.65)    | 0.79 (0.76-0.83)         |
|                          | 15-18                | 0.69 (0.60-0.81)         | 1.01 (0.89-1.16)        | 0.71 (0.66-0.76)    | 0.66 (0.60-0.71)                      | 1.10 (1.02-1.18)        | 0.64 (0.60-0.68)    | 1.25 (1.11-1.40)         | 2.08 (1.98-2.18)        | 0.57 (0.52-0.64)    | 1.37 (1.31-1.43)         |
|                          | 19-22                | 0.86 (0.73-1.00)         | 1.25 (1.09-1.44)        | 0.72 (0.67-0.77)    | 0.91 (0.83-1.00)                      | 1.42 (1.32-1.53)        | 0.68 (0.64-0.72)    | 1.68 (1.53-1.85)         | 2.38 (2.28-2.49)        | 0.68 (0.62-0.74)    | 2.19 (2.06-2.32)         |
|                          | 23-26                | 1.21 (1.04-1.40)         | 1.67 (1.46-1.90)        | 0.78 (0.73-0.82)    | 1.16 (1.07-1.26)                      | 1.71 (1.60-1.84)        | 0.71 (0.67-0.74)    | 1.37 (1.15-1.62)         | 2.63 (2.49-2.77)        | 0.51 (0.44-0.60)    | 2.11 (1.04-4.26)         |
| Non-COVID-19 death       | 3-6                  | 0.36 (0.30-0.44)         | 0.43 (0.34-0.54)        | 0.92 (0.78-1.08)    | 0.69 (0.49-0.97)                      | 0.50 (0.37-0.68)        | 1.33 (0.99-1.77)    | -                        | 0.30 (0.20-0.45)        | -                   | -                        |
|                          | 7-10                 | 0.55 (0.45-0.67)         | 0.65 (0.50-0.84)        | 0.95 (0.83-1.10)    | 0.59 (0.42-0.83)                      | 0.49 (0.37-0.65)        | 1.10 (0.82-1.48)    | -                        | 0.34 (0.23-0.50)        | -                   | -                        |
|                          | 11-14                | 0.62 (0.50-0.77)         | 0.85 (0.65-1.10)        | 0.89 (0.78-1.01)    | 0.54 (0.38-0.77)                      | 0.51 (0.39-0.68)        | 0.94 (0.71-1.24)    | -                        | 0.40 (0.27-0.60)        | -                   | -                        |
|                          | 15-18                | 0.53 (0.44-0.65)         | 0.67 (0.53-0.84)        | 0.82 (0.72-0.93)    | 0.82 (0.55-1.22)                      | 0.92 (0.66-1.27)        | 1.07 (0.81-1.40)    | -                        | 0.76 (0.47-1.21)        | -                   | -                        |
|                          | 19-22                | 0.77 (0.62-0.96)         | 0.83 (0.64-1.08)        | 0.97 (0.85-1.10)    | 0.66 (0.46-0.93)                      | 0.71 (0.53-0.95)        | 0.86 (0.66-1.13)    | -                        | 0.70 (0.44-1.11)        | -                   | -                        |
|                          | 23-26                | 0.65 (0.53-0.79)         | 0.78 (0.61-0.99)        | 0.97 (0.87-1.10)    | 0.96 (0.66-1.38)                      | 0.97 (0.70-1.36)        | 1.05 (0.82-1.35)    | -                        | 0.65 (0.42-1.03)        | -                   | -                        |
| Any SARS-CoV-2 test      | 3-6                  | 2.23 (2.14-2.34)         | 2.83 (2.71-2.96)        | 0.87 (0.86-0.88)    | 2.39 (2.32-2.47)                      | 2.60 (2.53-2.67)        | 0.80 (0.79-0.82)    | 2.94 (2.82-3.07)         | 3.87 (3.79-3.94)        | 0.90 (0.87-0.93)    | 2.63 (2.59-2.66)         |
|                          | 7-10                 | 2.59 (2.48-2.71)         | 3.03 (2.90-3.17)        | 0.87 (0.86-0.88)    | 2.27 (2.21-2.34)                      | 2.49 (2.43-2.56)        | 0.81 (0.80-0.83)    | 3.16 (3.04-3.29)         | 3.82 (3.75-3.89)        | 0.87 (0.84-0.90)    | 3.04 (2.99-3.08)         |
|                          | 11-14                | 2.57 (2.46-2.69)         | 3.03 (2.90-3.17)        | 0.88 (0.86-0.89)    | 2.17 (2.11-2.24)                      | 2.38 (2.32-2.44)        | 0.82 (0.81-0.84)    | 3.40 (3.27-3.54)         | 4.00 (3.93-4.08)        | 0.86 (0.83-0.88)    | 3.08 (3.03-3.12)         |
|                          | 15-18                | 2.46 (2.35-2.57)         | 2.87 (2.75-3.00)        | 0.87 (0.86-0.88)    | 2.22 (2.16-2.29)                      | 2.51 (2.45-2.58)        | 0.84 (0.82-0.85)    | 3.68 (3.54-3.83)         | 4.40 (4.32-4.49)        | 0.87 (0.84-0.90)    | 3.55 (3.49-3.61)         |
|                          | 19-22                | 2.70 (2.58-2.83)         | 3.15 (3.02-3.30)        | 0.87 (0.86-0.89)    | 2.47 (2.40-2.55)                      | 2.74 (2.66-2.81)        | 0.85 (0.84-0.87)    | 3.91 (3.76-4.06)         | 4.64 (4.55-4.73)        | 0.87 (0.85-0.90)    | 5.07 (4.94-5.20)         |
|                          | 23-26                | 2.97 (2.84-3.10)         | 3.40 (3.25-3.55)        | 0.89 (0.88-0.90)    | 2.66 (2.58-2.74)                      | 2.94 (2.86-3.02)        | 0.85 (0.83-0.86)    | 4.37 (4.14-4.62)         | 5.36 (5.23-5.48)        | 0.80 (0.76-0.83)    | 6.12 (4.99-7.52)         |

<sup>a</sup> And not clinically vulnerable

**Supplementary Table 55: Adjusted hazard ratios for effect of vaccination (female-only model).**

| Outcome                  | Weeks since 2nd dose | 65+ years                |                         |                     | 18-64 years and clinically vulnerable |                         |                     | 40-64 years <sup>a</sup> |                         |                     | 18-39 years <sup>a</sup> |
|--------------------------|----------------------|--------------------------|-------------------------|---------------------|---------------------------------------|-------------------------|---------------------|--------------------------|-------------------------|---------------------|--------------------------|
|                          |                      | BNT162b2 vs unvaccinated | ChAdOx1 vs unvaccinated | BNT162b2 vs ChAdOx1 | BNT162b2 vs unvaccinated              | ChAdOx1 vs unvaccinated | BNT162b2 vs ChAdOx1 | BNT162b2 vs unvaccinated | ChAdOx1 vs unvaccinated | BNT162b2 vs ChAdOx1 | BNT162b2 vs unvaccinated |
| COVID-19 hospitalisation | 3-6                  | 0.09 (0.04-0.19)         | 0.16 (0.06-0.44)        | 0.66 (0.23-1.85)    | -                                     | 0.09 (0.05-0.17)        | -                   | -                        | 0.03 (0.02-0.06)        | -                   | 0.04 (0.02-0.08)         |
|                          | 7-10                 | 0.05 (0.02-0.10)         | 0.06 (0.04-0.10)        | 0.50 (0.25-1.00)    | 0.04 (0.02-0.08)                      | 0.09 (0.07-0.12)        | 0.49 (0.26-0.92)    | -                        | 0.04 (0.03-0.07)        | -                   | 0.11 (0.07-0.18)         |
|                          | 11-14                | 0.09 (0.06-0.14)         | 0.13 (0.09-0.18)        | 0.52 (0.52-0.52)    | 0.04 (0.03-0.06)                      | 0.12 (0.10-0.15)        | 0.35 (0.23-0.54)    | -                        | 0.05 (0.03-0.07)        | -                   | 0.13 (0.09-0.20)         |
|                          | 15-18                | 0.10 (0.07-0.14)         | 0.14 (0.11-0.19)        | 0.58 (0.46-0.75)    | 0.08 (0.05-0.11)                      | 0.18 (0.14-0.22)        | 0.48 (0.35-0.67)    | -                        | 0.10 (0.07-0.14)        | -                   | 0.12 (0.08-0.20)         |
|                          | 19-22                | 0.10 (0.08-0.14)         | 0.19 (0.14-0.24)        | 0.56 (0.46-0.69)    | 0.10 (0.07-0.13)                      | 0.19 (0.15-0.24)        | 0.59 (0.43-0.81)    | -                        | 0.12 (0.08-0.17)        | -                   | 0.23 (0.12-0.43)         |
|                          | 23-26                | 0.15 (0.11-0.20)         | 0.20 (0.16-0.26)        | 0.65 (0.53-0.79)    | 0.07 (0.05-0.10)                      | 0.21 (0.16-0.26)        | 0.35 (0.26-0.48)    | -                        | 0.12 (0.09-0.16)        | -                   | -                        |
| COVID-19 death           | 3-6                  | -                        | -                       | -                   | -                                     | -                       | -                   | -                        | -                       | -                   | -                        |
|                          | 7-10                 | -                        | -                       | -                   | -                                     | -                       | -                   | -                        | -                       | -                   | -                        |
|                          | 11-14                | -                        | 0.09 (0.09-0.09)        | -                   | -                                     | 0.07 (0.02-0.23)        | -                   | -                        | -                       | -                   | -                        |
|                          | 15-18                | 0.05 (0.02-0.12)         | 0.11 (0.05-0.24)        | 0.32 (0.13-0.77)    | 0.06 (0.02-0.16)                      | 0.07 (0.04-0.14)        | 0.95 (0.35-2.62)    | -                        | -                       | -                   | -                        |
|                          | 19-22                | 0.05 (0.03-0.10)         | 0.11 (0.06-0.19)        | 0.50 (0.30-0.83)    | 0.10 (0.04-0.25)                      | 0.17 (0.08-0.34)        | 0.86 (0.31-2.41)    | -                        | 0.08 (0.02-0.25)        | -                   | -                        |
|                          | 23-26                | 0.12 (0.07-0.22)         | 0.16 (0.10-0.27)        | 0.45 (0.29-0.69)    | 0.14 (0.05-0.42)                      | 0.18 (0.08-0.39)        | 0.81 (0.32-2.09)    | -                        | 0.12 (0.02-0.59)        | -                   | -                        |
| Positive SARS-CoV-2 test | 3-6                  | 0.25 (0.14-0.42)         | 0.57 (0.37-0.86)        | 0.64 (0.44-0.92)    | 0.20 (0.15-0.26)                      | 0.72 (0.64-0.81)        | 0.30 (0.23-0.39)    | 0.27 (0.22-0.32)         | 0.67 (0.63-0.71)        | 0.42 (0.35-0.50)    | 0.23 (0.21-0.24)         |
|                          | 7-10                 | 0.34 (0.24-0.48)         | 0.69 (0.53-0.91)        | 0.51 (0.42-0.62)    | 0.35 (0.32-0.39)                      | 0.73 (0.68-0.79)        | 0.51 (0.47-0.56)    | 0.42 (0.36-0.48)         | 0.78 (0.74-0.82)        | 0.52 (0.45-0.60)    | 0.40 (0.38-0.42)         |
|                          | 11-14                | 0.36 (0.29-0.45)         | 0.59 (0.49-0.70)        | 0.61 (0.55-0.67)    | 0.41 (0.38-0.45)                      | 0.77 (0.72-0.82)        | 0.59 (0.55-0.63)    | 0.69 (0.61-0.77)         | 1.13 (1.08-1.19)        | 0.56 (0.50-0.62)    | 0.54 (0.52-0.57)         |
|                          | 15-18                | 0.51 (0.42-0.61)         | 0.76 (0.65-0.88)        | 0.68 (0.63-0.73)    | 0.53 (0.49-0.58)                      | 0.93 (0.87-0.99)        | 0.62 (0.59-0.66)    | 0.93 (0.84-1.03)         | 1.36 (1.29-1.42)        | 0.68 (0.62-0.74)    | 0.89 (0.85-0.92)         |
|                          | 19-22                | 0.57 (0.48-0.66)         | 0.93 (0.81-1.08)        | 0.70 (0.65-0.74)    | 0.78 (0.72-0.86)                      | 1.16 (1.09-1.24)        | 0.68 (0.64-0.72)    | 1.10 (1.00-1.20)         | 1.53 (1.46-1.60)        | 0.68 (0.63-0.73)    | 1.24 (1.17-1.32)         |
|                          | 23-26                | 0.80 (0.68-0.93)         | 1.18 (1.03-1.35)        | 0.72 (0.68-0.76)    | 0.81 (0.75-0.88)                      | 1.24 (1.17-1.32)        | 0.68 (0.65-0.72)    | 1.01 (0.86-1.18)         | 1.58 (1.50-1.67)        | 0.65 (0.57-0.74)    | 2.06 (1.20-3.54)         |
| Non-COVID-19 death       | 3-6                  | 0.26 (0.19-0.34)         | 0.40 (0.30-0.54)        | 0.72 (0.59-0.88)    | 0.46 (0.28-0.75)                      | 0.39 (0.25-0.60)        | 1.18 (0.78-1.79)    | -                        | 0.29 (0.12-0.70)        | -                   | -                        |
|                          | 7-10                 | 0.36 (0.27-0.47)         | 0.42 (0.32-0.57)        | 0.76 (0.65-0.90)    | 0.23 (0.13-0.39)                      | 0.28 (0.18-0.42)        | 0.88 (0.62-1.27)    | -                        | 0.25 (0.12-0.50)        | -                   | -                        |
|                          | 11-14                | 0.50 (0.38-0.64)         | 0.50 (0.39-0.66)        | 0.86 (0.74-0.99)    | 0.29 (0.18-0.47)                      | 0.41 (0.27-0.62)        | 0.92 (0.67-1.28)    | -                        | 0.82 (0.46-1.46)        | -                   | -                        |
|                          | 15-18                | 0.46 (0.36-0.60)         | 0.62 (0.46-0.82)        | 0.86 (0.75-0.99)    | 0.40 (0.26-0.63)                      | 0.59 (0.39-0.90)        | 0.88 (0.64-1.22)    | -                        | 0.45 (0.25-0.82)        | -                   | -                        |
|                          | 19-22                | 0.50 (0.39-0.65)         | 0.58 (0.43-0.78)        | 0.95 (0.82-1.09)    | 0.45 (0.25-0.80)                      | 0.56 (0.35-0.89)        | 0.90 (0.63-1.28)    | -                        | 0.48 (0.26-0.86)        | -                   | -                        |
|                          | 23-26                | 0.59 (0.45-0.77)         | 0.68 (0.51-0.91)        | 0.87 (0.76-0.99)    | 0.59 (0.35-1.01)                      | 0.73 (0.46-1.15)        | 0.96 (0.70-1.32)    | -                        | 0.49 (0.27-0.91)        | -                   | -                        |
| Any SARS-CoV-2 test      | 3-6                  | 1.53 (1.46-1.60)         | 2.03 (1.94-2.12)        | 0.85 (0.84-0.86)    | 2.14 (2.08-2.20)                      | 2.30 (2.25-2.35)        | 0.77 (0.76-0.79)    | 2.04 (1.96-2.12)         | 2.65 (2.60-2.69)        | 0.94 (0.91-0.97)    | 1.72 (1.69-1.74)         |
|                          | 7-10                 | 1.74 (1.66-1.82)         | 2.08 (1.99-2.18)        | 0.86 (0.85-0.87)    | 1.98 (1.93-2.03)                      | 2.12 (2.07-2.17)        | 0.79 (0.78-0.80)    | 1.98 (1.91-2.05)         | 2.41 (2.37-2.45)        | 0.91 (0.89-0.94)    | 1.95 (1.93-1.98)         |
|                          | 11-14                | 1.78 (1.70-1.87)         | 2.09 (2.00-2.18)        | 0.87 (0.86-0.88)    | 1.83 (1.78-1.88)                      | 1.94 (1.90-1.99)        | 0.83 (0.82-0.84)    | 2.30 (2.21-2.38)         | 2.54 (2.50-2.59)        | 0.95 (0.93-0.98)    | 1.99 (1.96-2.02)         |
|                          | 15-18                | 1.80 (1.72-1.88)         | 2.15 (2.06-2.25)        | 0.87 (0.85-0.88)    | 1.72 (1.67-1.77)                      | 1.92 (1.88-1.97)        | 0.83 (0.82-0.84)    | 2.49 (2.40-2.59)         | 2.81 (2.76-2.86)        | 0.95 (0.92-0.97)    | 2.22 (2.19-2.26)         |
|                          | 19-22                | 1.83 (1.75-1.91)         | 2.22 (2.13-2.32)        | 0.87 (0.86-0.88)    | 1.98 (1.93-2.04)                      | 2.16 (2.11-2.21)        | 0.82 (0.81-0.84)    | 2.59 (2.49-2.69)         | 2.99 (2.93-3.05)        | 0.94 (0.91-0.96)    | 2.82 (2.75-2.89)         |
|                          | 23-26                | 1.97 (1.88-2.05)         | 2.31 (2.21-2.41)        | 0.88 (0.87-0.90)    | 2.06 (2.00-2.12)                      | 2.25 (2.20-2.31)        | 0.83 (0.82-0.84)    | 2.84 (2.70-2.99)         | 3.34 (3.26-3.41)        | 0.87 (0.84-0.90)    | 3.10 (2.59-3.71)         |

<sup>a</sup> And not clinically vulnerable

**Supplementary Table 56: Adjusted hazard ratios for effect of vaccination (male-only model).**

| Outcome                  | Weeks since 2nd dose | 65+ years                |                         |                     | 18-64 years and clinically vulnerable |                         |                     | 40-64 years <sup>a</sup> |                         |                     | 18-39 years <sup>a</sup> |
|--------------------------|----------------------|--------------------------|-------------------------|---------------------|---------------------------------------|-------------------------|---------------------|--------------------------|-------------------------|---------------------|--------------------------|
|                          |                      | BNT162b2 vs unvaccinated | ChAdOx1 vs unvaccinated | BNT162b2 vs ChAdOx1 | BNT162b2 vs unvaccinated              | ChAdOx1 vs unvaccinated | BNT162b2 vs ChAdOx1 | BNT162b2 vs unvaccinated | ChAdOx1 vs unvaccinated | BNT162b2 vs ChAdOx1 | BNT162b2 vs unvaccinated |
| COVID-19 hospitalisation | 3-6                  | 0.06 (0.03-0.12)         | 0.11 (0.06-0.20)        | 0.48 (0.24-0.96)    | 0.06 (0.02-0.25)                      | 0.08 (0.04-0.18)        | 1.04 (0.19-5.54)    | -                        | 0.06 (0.04-0.09)        | -                   | 0.05 (0.02-0.10)         |
|                          | 7-10                 | 0.08 (0.05-0.15)         | 0.14 (0.09-0.23)        | 0.54 (0.31-0.95)    | 0.04 (0.02-0.07)                      | 0.12 (0.09-0.17)        | 0.28 (0.15-0.51)    | -                        | 0.06 (0.04-0.08)        | -                   | 0.05 (0.02-0.11)         |
|                          | 11-14                | 0.09 (0.06-0.13)         | 0.06 (0.04-0.08)        | 0.57 (0.43-0.76)    | 0.06 (0.04-0.08)                      | 0.16 (0.13-0.21)        | 0.40 (0.28-0.59)    | -                        | 0.06 (0.04-0.08)        | -                   | 0.07 (0.04-0.15)         |
|                          | 15-18                | 0.16 (0.12-0.22)         | 0.21 (0.16-0.28)        | 0.66 (0.54-0.80)    | 0.07 (0.05-0.11)                      | 0.21 (0.16-0.26)        | 0.39 (0.28-0.55)    | -                        | 0.09 (0.07-0.12)        | -                   | 0.07 (0.04-0.15)         |
|                          | 19-22                | 0.21 (0.16-0.27)         | 0.24 (0.19-0.31)        | 0.57 (0.48-0.69)    | 0.07 (0.05-0.10)                      | 0.20 (0.15-0.25)        | 0.45 (0.32-0.63)    | -                        | 0.11 (0.09-0.15)        | -                   | 0.11 (0.04-0.28)         |
|                          | 23-26                | 0.25 (0.20-0.33)         | 0.30 (0.23-0.38)        | 0.72 (0.61-0.84)    | 0.12 (0.09-0.17)                      | 0.25 (0.20-0.32)        | 0.58 (0.45-0.75)    | -                        | 0.12 (0.09-0.16)        | -                   | -                        |
| COVID-19 death           | 3-6                  | 0.03 (0.01-0.10)         | -                       | -                   | -                                     | -                       | -                   | -                        | -                       | -                   | -                        |
|                          | 7-10                 | -                        | 0.05 (0.02-0.16)        | -                   | -                                     | -                       | -                   | -                        | -                       | -                   | -                        |
|                          | 11-14                | -                        | -                       | 0.79 (0.79-0.79)    | -                                     | 0.08 (0.04-0.16)        | -                   | -                        | 0.02 (0.01-0.06)        | -                   | -                        |
|                          | 15-18                | 0.10 (0.05-0.20)         | 0.11 (0.06-0.21)        | 0.76 (0.43-1.34)    | -                                     | 0.12 (0.06-0.22)        | -                   | -                        | 0.03 (0.01-0.10)        | -                   | -                        |
|                          | 19-22                | 0.14 (0.08-0.22)         | 0.11 (0.07-0.18)        | 0.76 (0.52-1.11)    | 0.10 (0.04-0.24)                      | 0.10 (0.05-0.19)        | 1.12 (0.47-2.66)    | -                        | 0.04 (0.02-0.10)        | -                   | -                        |
|                          | 23-26                | 0.12 (0.07-0.19)         | 0.16 (0.10-0.24)        | 0.79 (0.54-1.16)    | 0.06 (0.02-0.15)                      | 0.13 (0.07-0.23)        | 0.40 (0.15-1.04)    | -                        | 0.09 (0.04-0.23)        | -                   | -                        |
| Positive SARS-CoV-2 test | 3-6                  | 0.15 (0.09-0.23)         | 0.33 (0.22-0.50)        | 0.72 (0.50-1.03)    | 0.25 (0.18-0.33)                      | 0.78 (0.68-0.90)        | 0.40 (0.31-0.52)    | 0.26 (0.21-0.33)         | 0.89 (0.84-0.94)        | 0.32 (0.26-0.40)    | 0.27 (0.25-0.28)         |
|                          | 7-10                 | 0.36 (0.26-0.49)         | 0.71 (0.55-0.91)        | 0.58 (0.49-0.69)    | 0.40 (0.35-0.45)                      | 0.82 (0.75-0.88)        | 0.53 (0.49-0.58)    | 0.49 (0.42-0.58)         | 1.09 (1.03-1.15)        | 0.46 (0.39-0.54)    | 0.43 (0.40-0.46)         |
|                          | 11-14                | 0.46 (0.37-0.57)         | 0.85 (0.70-1.03)        | 0.62 (0.57-0.69)    | 0.49 (0.44-0.54)                      | 0.97 (0.90-1.04)        | 0.58 (0.54-0.62)    | 0.83 (0.72-0.94)         | 1.36 (1.29-1.44)        | 0.59 (0.52-0.66)    | 0.62 (0.59-0.66)         |
|                          | 15-18                | 0.62 (0.52-0.74)         | 0.87 (0.76-1.01)        | 0.71 (0.66-0.76)    | 0.62 (0.56-0.69)                      | 1.08 (1.00-1.17)        | 0.65 (0.61-0.69)    | 0.96 (0.85-1.08)         | 1.73 (1.65-1.82)        | 0.58 (0.53-0.65)    | 1.05 (1.01-1.10)         |
|                          | 19-22                | 0.77 (0.65-0.91)         | 1.07 (0.92-1.24)        | 0.72 (0.67-0.77)    | 0.85 (0.76-0.95)                      | 1.29 (1.19-1.40)        | 0.68 (0.64-0.73)    | 1.35 (1.22-1.50)         | 1.96 (1.87-2.05)        | 0.69 (0.64-0.75)    | 1.65 (1.54-1.76)         |
|                          | 23-26                | 0.96 (0.81-1.12)         | 1.28 (1.11-1.48)        | 0.77 (0.73-0.82)    | 1.02 (0.93-1.13)                      | 1.51 (1.40-1.63)        | 0.71 (0.68-0.75)    | 0.99 (0.82-1.19)         | 2.12 (2.01-2.24)        | 0.53 (0.45-0.62)    | 1.24 (0.58-2.64)         |
| Non-COVID-19 death       | 3-6                  | 0.32 (0.25-0.41)         | 0.34 (0.26-0.43)        | 0.93 (0.80-1.09)    | 0.44 (0.29-0.67)                      | 0.32 (0.23-0.45)        | 1.27 (0.95-1.70)    | -                        | 0.30 (0.19-0.47)        | -                   | -                        |
|                          | 7-10                 | 0.49 (0.38-0.62)         | 0.63 (0.47-0.84)        | 0.96 (0.84-1.11)    | 0.37 (0.25-0.55)                      | 0.32 (0.23-0.44)        | 1.04 (0.78-1.40)    | -                        | 0.37 (0.24-0.57)        | -                   | -                        |
|                          | 11-14                | 0.53 (0.41-0.69)         | 0.81 (0.60-1.09)        | 0.90 (0.79-1.02)    | 0.35 (0.23-0.53)                      | 0.33 (0.24-0.45)        | 0.90 (0.68-1.19)    | -                        | 0.38 (0.25-0.59)        | -                   | -                        |
|                          | 15-18                | 0.51 (0.40-0.65)         | 0.60 (0.47-0.77)        | 0.83 (0.73-0.94)    | 0.48 (0.30-0.77)                      | 0.66 (0.45-0.97)        | 1.01 (0.77-1.33)    | -                        | 0.78 (0.47-1.27)        | -                   | -                        |
|                          | 19-22                | 0.71 (0.54-0.92)         | 0.80 (0.60-1.07)        | 0.97 (0.86-1.10)    | 0.42 (0.28-0.62)                      | 0.49 (0.35-0.67)        | 0.82 (0.63-1.07)    | -                        | 0.75 (0.46-1.22)        | -                   | -                        |
|                          | 23-26                | 0.57 (0.45-0.72)         | 0.79 (0.61-1.03)        | 0.98 (0.88-1.11)    | 0.50 (0.34-0.75)                      | 0.67 (0.46-0.97)        | 0.99 (0.77-1.27)    | -                        | 0.68 (0.41-1.13)        | -                   | -                        |
| Any SARS-CoV-2 test      | 3-6                  | 1.58 (1.50-1.66)         | 2.00 (1.91-2.10)        | 0.87 (0.86-0.89)    | 1.90 (1.83-1.97)                      | 2.13 (2.06-2.19)        | 0.80 (0.79-0.82)    | 2.18 (2.09-2.28)         | 2.97 (2.91-3.03)        | 0.92 (0.89-0.95)    | 1.97 (1.94-2.00)         |
|                          | 7-10                 | 1.85 (1.76-1.94)         | 2.12 (2.02-2.22)        | 0.88 (0.86-0.89)    | 1.88 (1.82-1.94)                      | 2.08 (2.02-2.14)        | 0.81 (0.80-0.83)    | 2.39 (2.29-2.49)         | 2.98 (2.92-3.03)        | 0.89 (0.87-0.92)    | 2.28 (2.25-2.32)         |
|                          | 11-14                | 1.84 (1.75-1.93)         | 2.16 (2.06-2.26)        | 0.88 (0.87-0.89)    | 1.82 (1.76-1.88)                      | 2.04 (1.98-2.10)        | 0.83 (0.81-0.84)    | 2.57 (2.46-2.68)         | 3.12 (3.06-3.18)        | 0.88 (0.85-0.91)    | 2.32 (2.28-2.36)         |
|                          | 15-18                | 1.82 (1.73-1.90)         | 2.05 (1.96-2.15)        | 0.87 (0.86-0.89)    | 1.86 (1.79-1.92)                      | 2.12 (2.06-2.18)        | 0.84 (0.82-0.85)    | 2.73 (2.62-2.84)         | 3.43 (3.36-3.50)        | 0.89 (0.86-0.92)    | 2.65 (2.61-2.70)         |
|                          | 19-22                | 1.99 (1.89-2.08)         | 2.29 (2.19-2.40)        | 0.88 (0.87-0.89)    | 2.00 (1.94-2.07)                      | 2.24 (2.18-2.31)        | 0.85 (0.84-0.87)    | 2.89 (2.78-3.02)         | 3.60 (3.52-3.67)        | 0.90 (0.87-0.92)    | 3.52 (3.43-3.63)         |
|                          | 23-26                | 2.19 (2.08-2.30)         | 2.43 (2.32-2.54)        | 0.89 (0.88-0.90)    | 2.12 (2.05-2.20)                      | 2.39 (2.32-2.47)        | 0.85 (0.83-0.86)    | 3.07 (2.89-3.27)         | 4.09 (3.99-4.19)        | 0.82 (0.78-0.85)    | 3.09 (2.44-3.90)         |

<sup>a</sup> And not clinically vulnerable

**Supplementary Table 57:** Per-comparison-period ratio of adjusted hazard ratios for effect of vaccination (female-only model).

| Outcome                  | 65+ years                |                         | 18-64 years and clinically vulnerable |                          |                         |                     | 40-64 years <sup>a</sup> |                         | 18-39 years <sup>a</sup> |                          |
|--------------------------|--------------------------|-------------------------|---------------------------------------|--------------------------|-------------------------|---------------------|--------------------------|-------------------------|--------------------------|--------------------------|
|                          | BNT162b2 vs unvaccinated | ChAdOx1 vs unvaccinated | BNT162b2 vs ChAdOx1                   | BNT162b2 vs unvaccinated | ChAdOx1 vs unvaccinated | BNT162b2 vs ChAdOx1 | BNT162b2 vs unvaccinated | ChAdOx1 vs unvaccinated | BNT162b2 vs ChAdOx1      | BNT162b2 vs unvaccinated |
| COVID-19 hospitalisation | 1.17 (1.05-1.32)         | 1.22 (1.09-1.38)        | 1.04 (0.93-1.17)                      | 1.21 (0.99-1.47)         | 1.22 (1.13-1.31)        | 0.99 (0.82-1.19)    | -                        | 1.31 (1.19-1.44)        | -                        | 1.38 (1.09-1.76)         |
| COVID-19 death           | 1.71 (1.04-2.81)         | 1.25 (0.80-1.93)        | 1.09 (0.70-1.70)                      | 1.49 (0.72-3.06)         | 1.51 (1.00-2.28)        | 0.92 (0.46-1.84)    | -                        | -                       | -                        | -                        |
| Positive SARS-CoV-2 test | 1.26 (1.18-1.34)         | 1.18 (1.10-1.26)        | 1.05 (1.02-1.09)                      | 1.30 (1.22-1.38)         | 1.14 (1.10-1.18)        | 1.13 (1.04-1.22)    | 1.32 (1.19-1.47)         | 1.20 (1.15-1.26)        | 1.09 (1.04-1.14)         | 1.52 (1.46-1.59)         |
| Non-COVID-19 death       | 1.16 (1.08-1.23)         | 1.12 (1.04-1.20)        | 1.04 (1.00-1.08)                      | 1.10 (0.95-1.29)         | 1.18 (1.06-1.31)        | 0.98 (0.90-1.07)    | -                        | 1.10 (0.89-1.37)        | -                        | -                        |
| Any SARS-CoV-2 test      | 1.04 (1.02-1.06)         | 1.03 (1.01-1.04)        | 1.01 (1.00-1.01)                      | 0.99 (0.95-1.03)         | 1.00 (0.96-1.04)        | 1.01 (1.00-1.02)    | 1.08 (1.05-1.10)         | 1.06 (1.02-1.09)        | 0.99 (0.98-1.01)         | 1.12 (1.09-1.16)         |

<sup>a</sup> And not clinically vulnerable

**Supplementary Table 58:** Per-comparison-period ratio of adjusted hazard ratios for effect of vaccination (male-only model).

| Outcome                  | 65+ years                |                         |                     | 18-64 years and clinically vulnerable |                         |                     | 40-64 years <sup>a</sup> |                         |                     | 18-39 years <sup>a</sup> |
|--------------------------|--------------------------|-------------------------|---------------------|---------------------------------------|-------------------------|---------------------|--------------------------|-------------------------|---------------------|--------------------------|
|                          | BNT162b2 vs unvaccinated | ChAdOx1 vs unvaccinated | BNT162b2 vs ChAdOx1 | BNT162b2 vs unvaccinated              | ChAdOx1 vs unvaccinated | BNT162b2 vs ChAdOx1 | BNT162b2 vs unvaccinated | ChAdOx1 vs unvaccinated | BNT162b2 vs ChAdOx1 | BNT162b2 vs unvaccinated |
| COVID-19 hospitalisation | 1.35 (1.22-1.49)         | 1.27 (1.00-1.60)        | 1.06 (0.98-1.15)    | 1.27 (1.12-1.44)                      | 1.18 (1.10-1.28)        | 1.14 (1.01-1.27)    | -                        | 1.21 (1.12-1.30)        | -                   | 1.21 (0.93-1.57)         |
| COVID-19 death           | 1.26 (0.99-1.61)         | 1.27 (0.97-1.65)        | 1.02 (0.74-1.42)    | -                                     | 1.13 (0.85-1.49)        | -                   | -                        | 1.64 (1.03-2.62)        | -                   | -                        |
| Positive SARS-CoV-2 test | 1.32 (1.22-1.43)         | 1.20 (1.11-1.29)        | 1.06 (1.03-1.09)    | 1.29 (1.25-1.33)                      | 1.15 (1.13-1.18)        | 1.08 (1.05-1.10)    | 1.32 (1.14-1.53)         | 1.20 (1.16-1.24)        | 1.11 (1.01-1.22)    | 1.57 (1.52-1.62)         |
| Non-COVID-19 death       | 1.12 (1.03-1.21)         | 1.15 (1.02-1.29)        | 1.01 (0.97-1.05)    | 1.04 (0.94-1.14)                      | 1.17 (1.06-1.30)        | 0.95 (0.89-1.02)    | -                        | 1.22 (1.09-1.37)        | -                   | 0.95 (0.56-1.60)         |
| Any SARS-CoV-2 test      | 1.05 (1.03-1.08)         | 1.03 (1.01-1.05)        | 1.00 (1.00-1.01)    | 1.02 (1.00-1.04)                      | 1.02 (1.00-1.05)        | 1.01 (1.01-1.02)    | 1.07 (1.06-1.08)         | 1.07 (1.05-1.09)        | 0.99 (0.97-1.00)    | 1.13 (1.08-1.18)         |

<sup>a</sup> And not clinically vulnerable

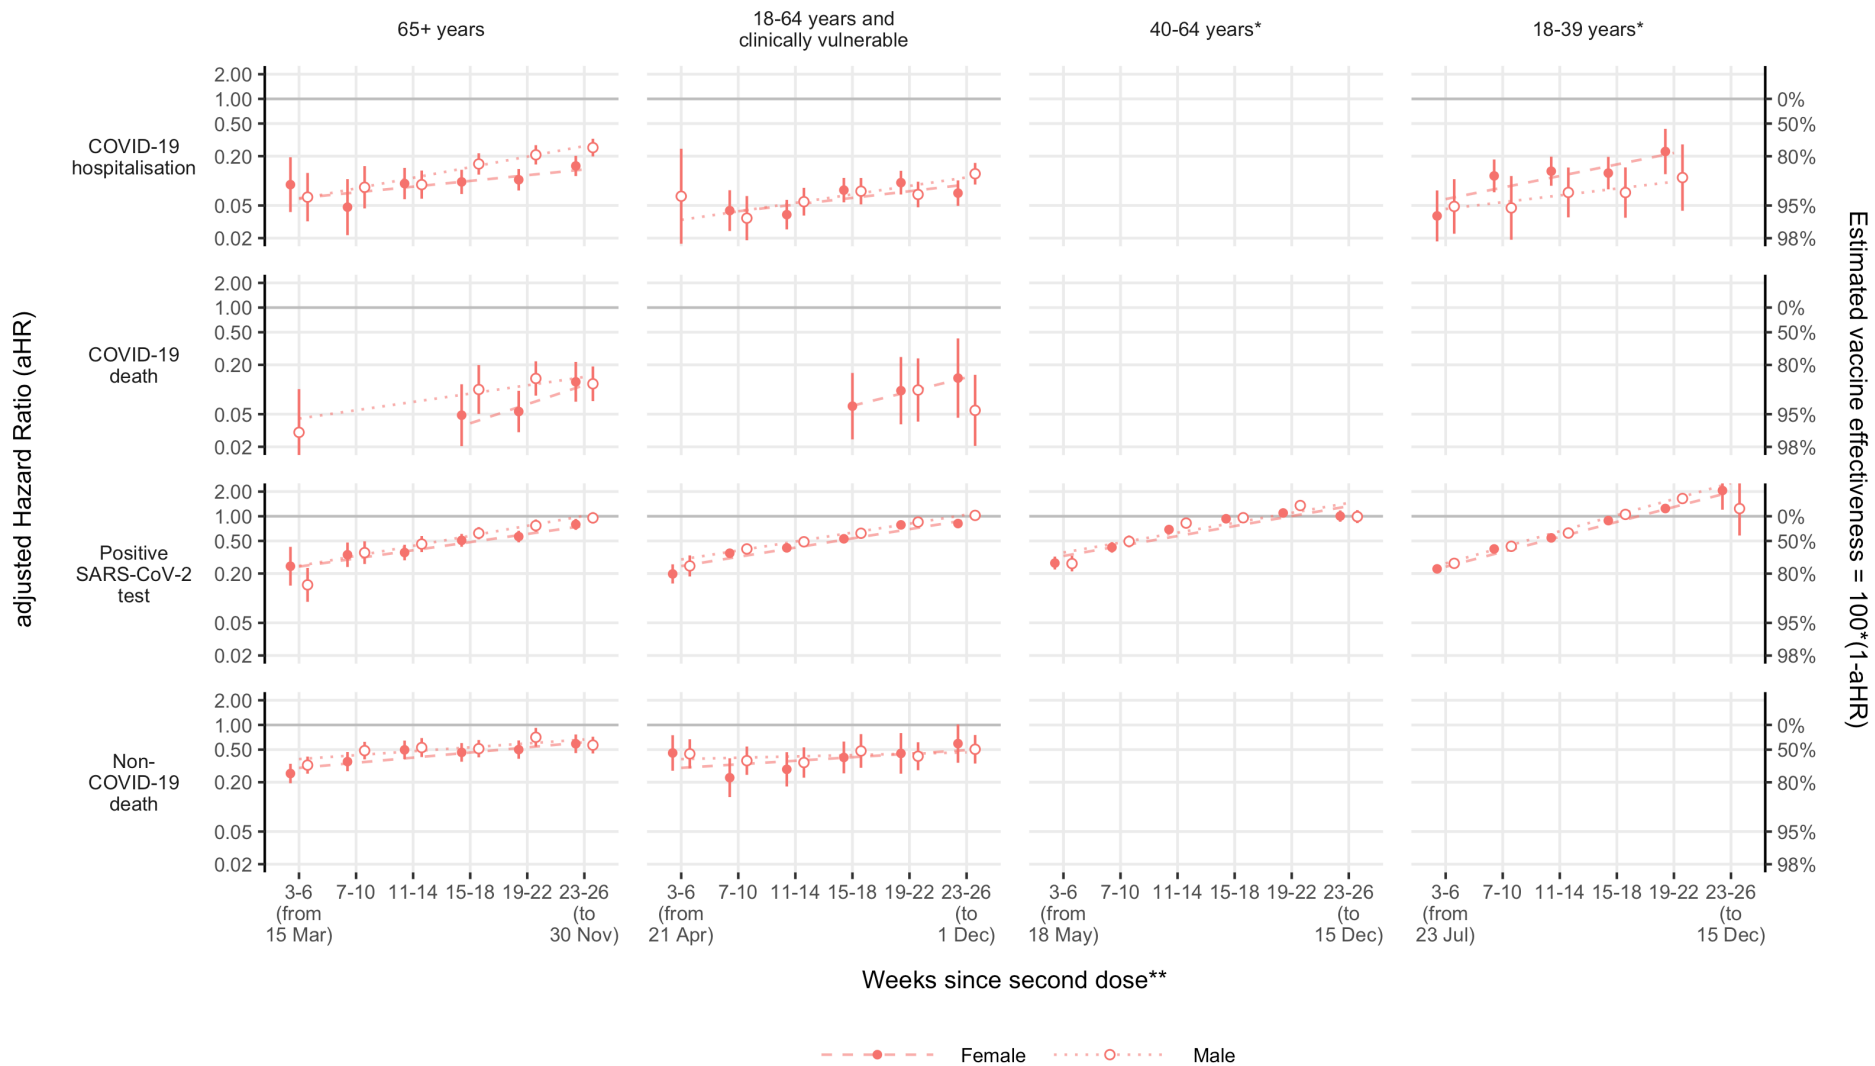

**Supplementary Figure 32:** Adjusted hazard ratios for BNT162b2 vs unvaccinated from the female- and male-only models.



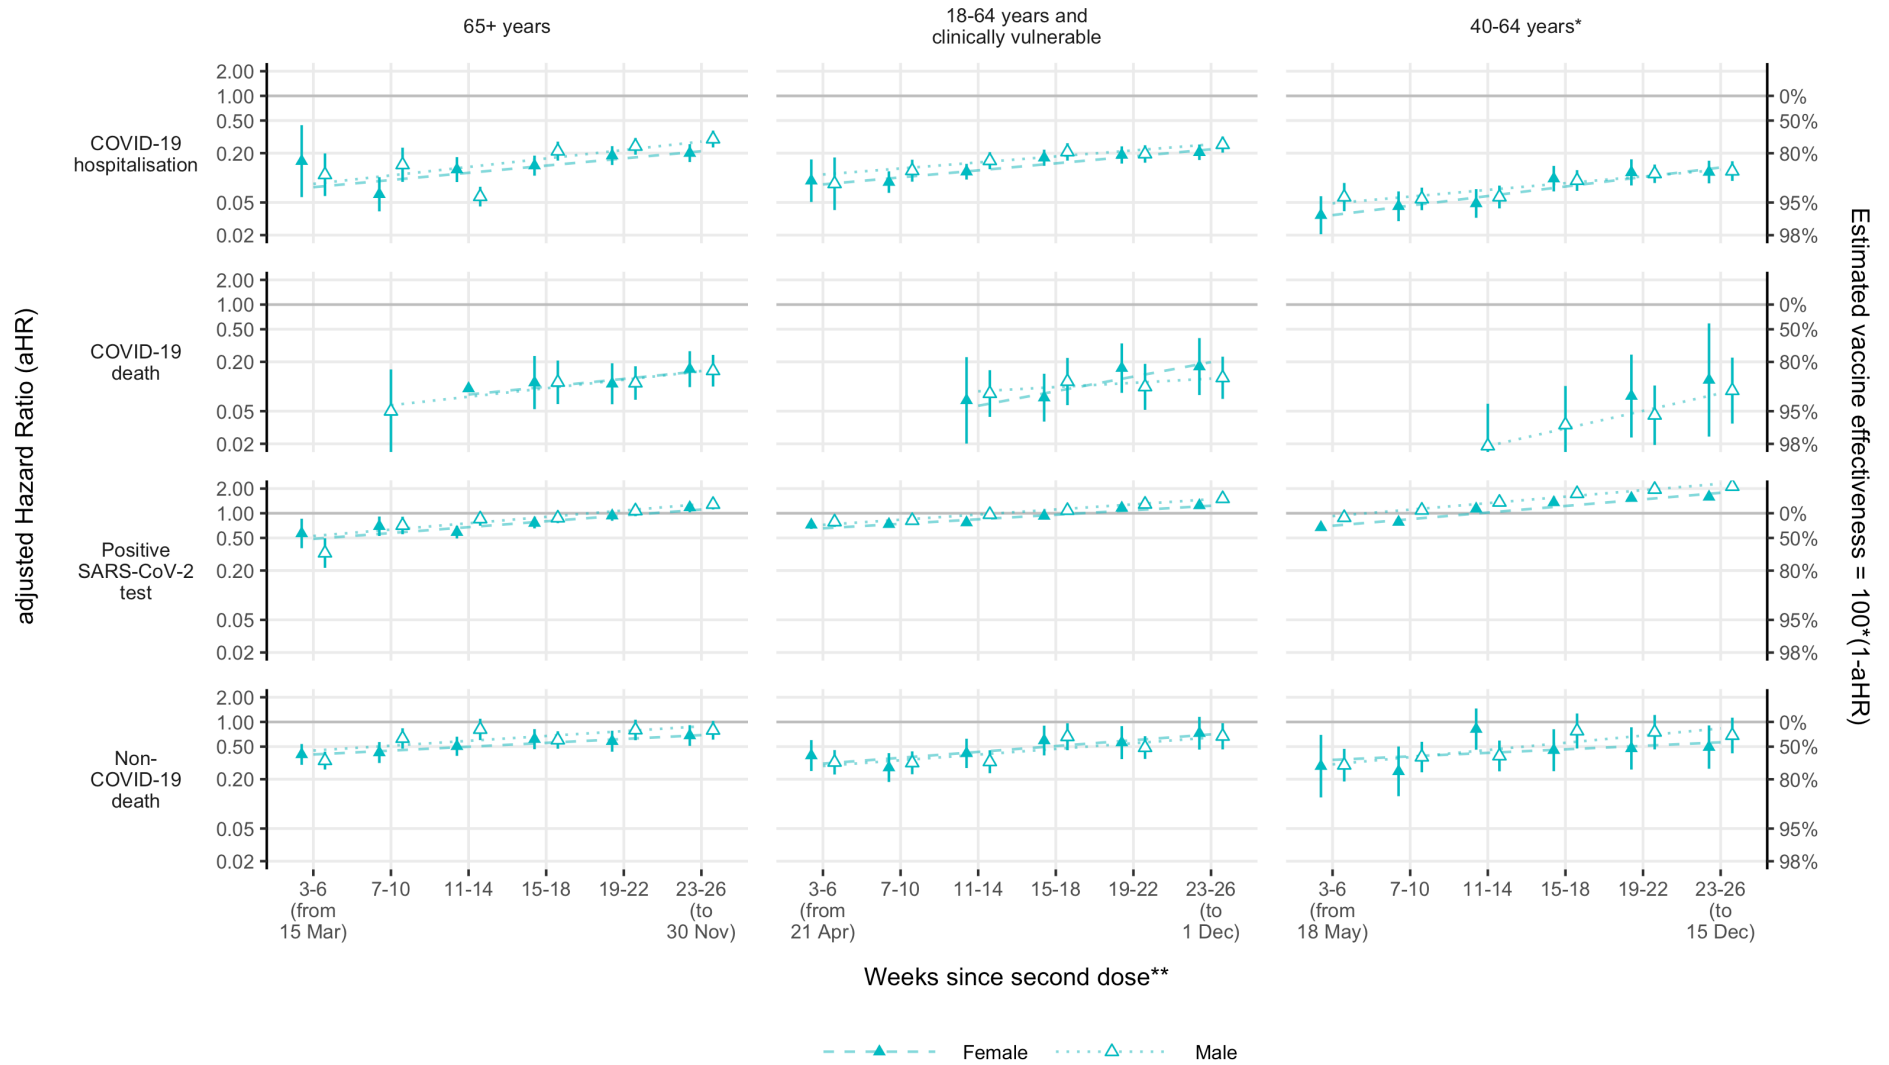

**Supplementary Figure 33:** Adjusted hazard ratios for ChAdOx1 vs unvaccinated from the female- and male-only models.

Any SARS-CoV-2 test

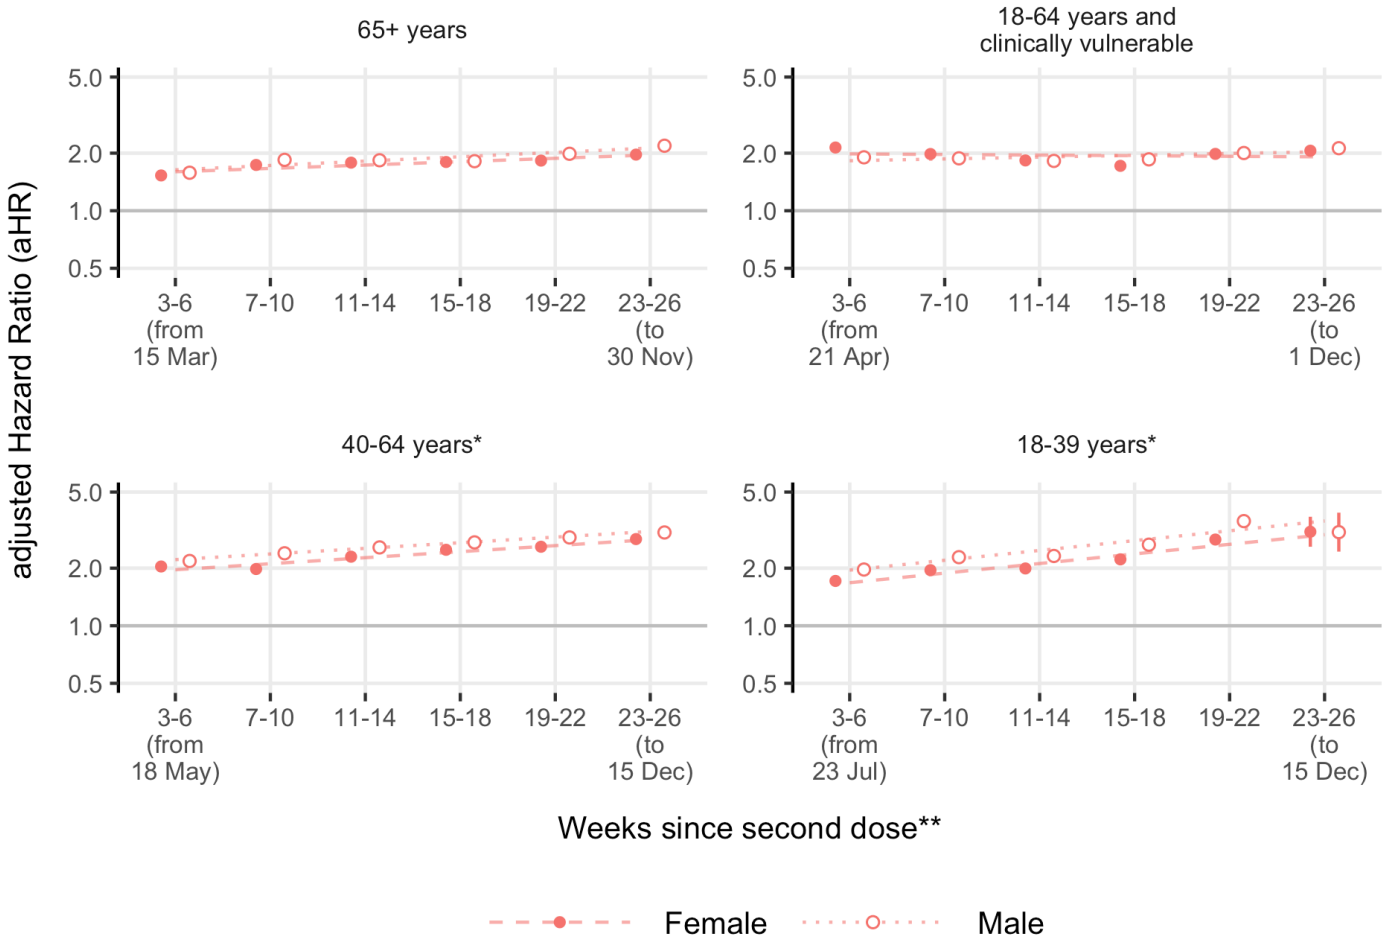

**Supplementary Figure 34:** Adjusted hazard ratios for any SARS-CoV-2 test for BNT162b2 vs unvaccinated from the female- and male-only models.

Any SARS-CoV-2 test

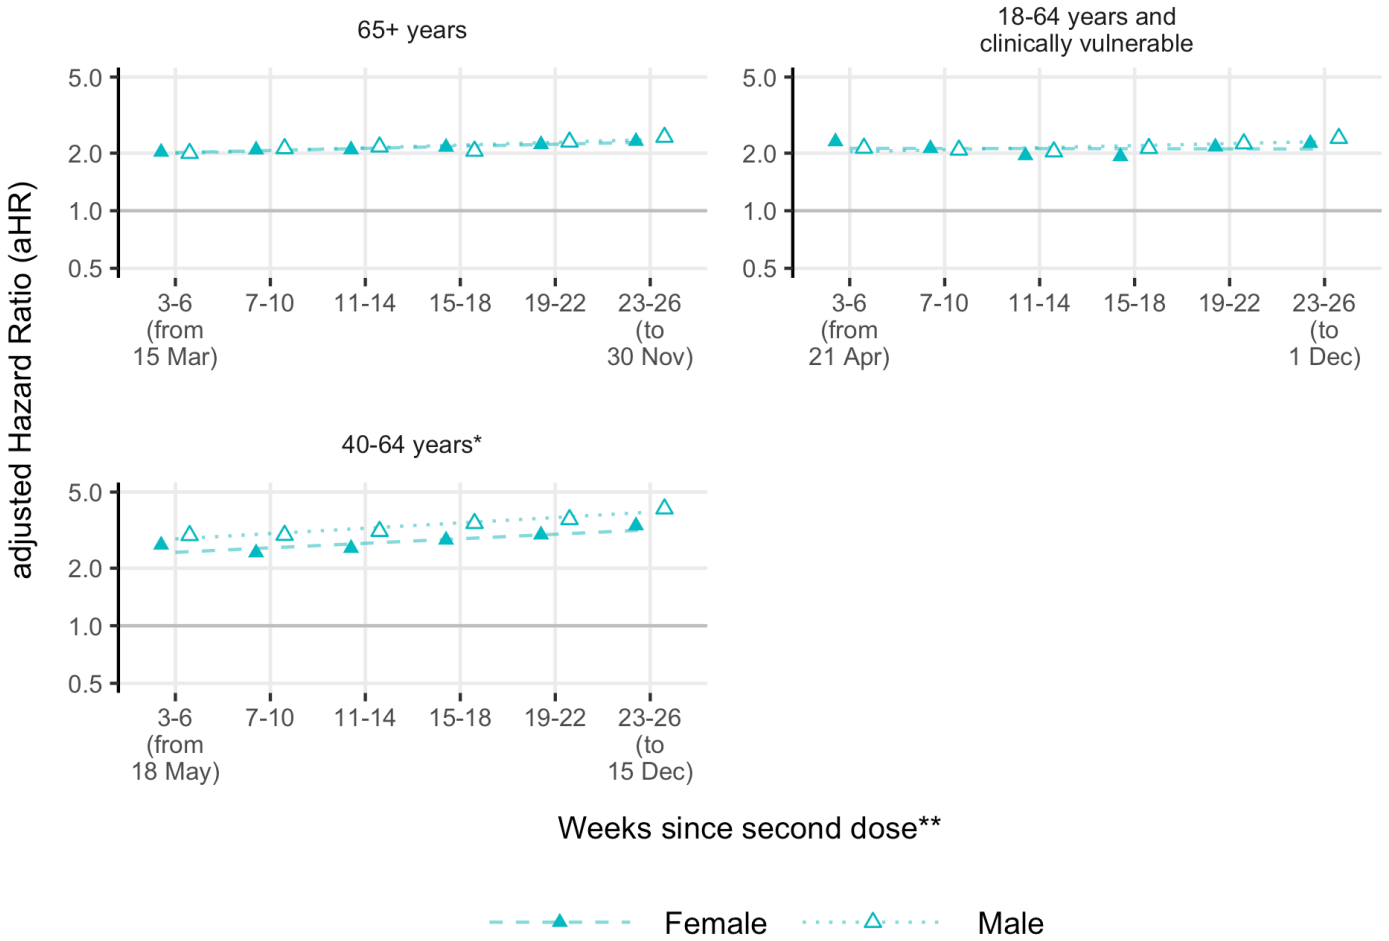

**Supplementary Figure 35:** Adjusted hazard ratios for any SARS-CoV-2 test for ChAdOx1 vs unvaccinated from the female- and male-only models.

## Waning vaccine effectiveness in older adults

This subsection provides additional results for the waning of vaccine effectiveness across two additional subgroups: 65-74 years and 75+ years. Supplementary Table 59 gives the event counts / person-years for each subgroup, outcome and comparison period. Supplementary Tables 60 and 61 give the unadjusted and adjusted hazard ratios respectively. Supplementary Table 57 gives the per-comparison-period ratio of adjusted hazard ratios. The adjusted hazard ratios are plotted in Supplementary Figures 36 and 37 for BNT162b2 vs unvaccinated and ChAdOx1 vs unvaccinated respectively. The adjusted hazard ratios with any SARS-CoV-2 test as the outcome are plotted in Supplementary Figures 38 and 39 for BNT162b2 vs unvaccinated and ChAdOx1 vs unvaccinated respectively.

**Supplementary Table 59: Event counts / person-years (older adults).**

| Outcome                  | Weeks since 2nd dose | 65-74 years       |                   |                 | 75+ years         |                   |                 |
|--------------------------|----------------------|-------------------|-------------------|-----------------|-------------------|-------------------|-----------------|
|                          |                      | BNT162b2          | ChAdOx1           | Unvaccinated    | BNT162b2          | ChAdOx1           | Unvaccinated    |
| COVID-19 hospitalisation | 3-6                  | 7 / 29,386        | 28 / 59,925       | 35 / 6,956      | 28 / 34,286       | 14 / 24,163       | 42 / 3,979      |
|                          | 7-10                 | 14 / 29,346       | 77 / 59,836       | 91 / 6,594      | 21 / 34,401       | 21 / 24,112       | 28 / 3,598      |
|                          | 11-14                | 63 / 29,303       | 224 / 59,731      | 161 / 6,278     | 63 / 34,306       | 119 / 24,054      | 42 / 3,347      |
|                          | 15-18                | 112 / 29,256      | 371 / 59,610      | 189 / 6,111     | 196 / 34,193      | 224 / 23,981      | 126 / 3,246     |
|                          | 19-22                | 133 / 29,205      | 483 / 59,478      | 182 / 5,932     | 287 / 34,069      | 280 / 23,904      | 140 / 3,097     |
|                          | 23-26                | 175 / 29,119      | 546 / 59,269      | 175 / 5,835     | 399 / 33,928      | 294 / 23,819      | 161 / 3,049     |
|                          | Total                | 504 / 175,615     | 1,729 / 357,849   | 833 / 37,706    | 994 / 205,183     | 952 / 144,033     | 539 / 20,316    |
| COVID-19 death           | 3-6                  | 0 / 29,386        | 7 / 59,926        | 7 / 6,959       | 7 / 34,289        | 0 / 24,164        | 21 / 3,983      |
|                          | 7-10                 | 7 / 29,347        | 7 / 59,840        | 21 / 6,599      | 0 / 34,405        | 7 / 24,115        | 7 / 3,602       |
|                          | 11-14                | 7 / 29,307        | 28 / 59,745       | 35 / 6,291      | 7 / 34,312        | 14 / 24,060       | 14 / 3,352      |
|                          | 15-18                | 14 / 29,265       | 49 / 59,643       | 42 / 6,134      | 28 / 34,206       | 35 / 23,998       | 28 / 3,257      |
|                          | 19-22                | 28 / 29,221       | 91 / 59,541       | 49 / 5,966      | 70 / 34,097       | 49 / 23,938       | 49 / 3,112      |
|                          | 23-26                | 28 / 29,144       | 70 / 59,362       | 42 / 5,876      | 84 / 33,976       | 56 / 23,870       | 56 / 3,074      |
|                          | Total                | 84 / 175,670      | 252 / 358,057     | 196 / 37,825    | 196 / 205,285     | 161 / 144,145     | 175 / 20,380    |
| Positive SARS-CoV-2 test | 3-6                  | 56 / 29,381       | 196 / 59,911      | 77 / 6,953      | 49 / 34,282       | 56 / 24,159       | 56 / 3,977      |
|                          | 7-10                 | 245 / 29,333      | 1,106 / 59,787    | 203 / 6,586     | 77 / 34,394       | 98 / 24,105       | 35 / 3,595      |
|                          | 11-14                | 791 / 29,255      | 2,751 / 59,545    | 357 / 6,259     | 287 / 34,291      | 623 / 24,028      | 70 / 3,344      |
|                          | 15-18                | 1,428 / 29,132    | 4,361 / 59,178    | 406 / 6,077     | 854 / 34,146      | 1,057 / 23,904    | 182 / 3,240     |
|                          | 19-22                | 1,638 / 28,968    | 4,823 / 58,721    | 378 / 5,885     | 1,442 / 33,952    | 1,610 / 23,741    | 203 / 3,089     |
|                          | 23-26                | 2,387 / 28,751    | 7,098 / 58,126    | 399 / 5,773     | 1,736 / 33,717    | 1,701 / 23,557    | 217 / 3,037     |
|                          | Total                | 6,545 / 174,820   | 20,335 / 355,268  | 1,820 / 37,533  | 4,445 / 204,782   | 5,145 / 143,494   | 763 / 20,282    |
| Non-COVID-19 death       | 3-6                  | 210 / 29,386      | 441 / 59,926      | 119 / 6,959     | 644 / 34,289      | 378 / 24,164      | 245 / 3,983     |
|                          | 7-10                 | 266 / 29,347      | 511 / 59,840      | 98 / 6,599      | 826 / 34,405      | 462 / 24,115      | 196 / 3,602     |
|                          | 11-14                | 273 / 29,307      | 616 / 59,745      | 84 / 6,291      | 1,015 / 34,312    | 532 / 24,060      | 189 / 3,352     |
|                          | 15-18                | 301 / 29,265      | 686 / 59,643      | 98 / 6,134      | 1,036 / 34,206    | 560 / 23,998      | 203 / 3,257     |
|                          | 19-22                | 329 / 29,221      | 658 / 59,541      | 91 / 5,966      | 1,071 / 34,097    | 532 / 23,938      | 168 / 3,112     |
|                          | 23-26                | 371 / 29,144      | 756 / 59,362      | 91 / 5,876      | 1,197 / 33,976    | 609 / 23,870      | 168 / 3,074     |
|                          | Total                | 1,750 / 175,670   | 3,668 / 358,057   | 581 / 37,825    | 5,789 / 205,285   | 3,073 / 144,145   | 1,169 / 20,380  |
| Any SARS-CoV-2 test      | 3-6                  | 34,867 / 27,815   | 75,194 / 56,446   | 3,451 / 6,664   | 30,450 / 33,034   | 24,696 / 23,116   | 2,492 / 3,766   |
|                          | 7-10                 | 38,696 / 27,591   | 84,329 / 56,000   | 3,612 / 6,290   | 34,482 / 32,898   | 26,719 / 22,930   | 2,086 / 3,419   |
|                          | 11-14                | 42,441 / 27,325   | 90,237 / 55,418   | 3,654 / 5,970   | 38,031 / 32,657   | 30,114 / 22,732   | 1,974 / 3,179   |
|                          | 15-18                | 41,412 / 27,287   | 89,145 / 55,286   | 3,787 / 5,785   | 38,780 / 32,459   | 29,330 / 22,621   | 1,974 / 3,086   |
|                          | 19-22                | 46,151 / 26,982   | 100,030 / 54,434  | 3,703 / 5,593   | 39,795 / 32,302   | 31,367 / 22,453   | 1,876 / 2,942   |
|                          | 23-26                | 51,205 / 26,573   | 109,263 / 53,530  | 3,682 / 5,478   | 43,218 / 31,915   | 33,957 / 22,150   | 1,932 / 2,886   |
|                          | Total                | 254,772 / 163,573 | 548,198 / 331,114 | 21,889 / 35,780 | 224,756 / 195,265 | 176,183 / 136,002 | 12,334 / 19,278 |

**Supplementary Table 60: Unadjusted hazard ratios for effect of vaccination (older adults).**

| Outcome                  | Weeks since 2nd dose | 65-74 years              |                         |                     | 75+ years                |                         |                     |
|--------------------------|----------------------|--------------------------|-------------------------|---------------------|--------------------------|-------------------------|---------------------|
|                          |                      | BNT162b2 vs unvaccinated | ChAdOx1 vs unvaccinated | BNT162b2 vs ChAdOx1 | BNT162b2 vs unvaccinated | ChAdOx1 vs unvaccinated | BNT162b2 vs ChAdOx1 |
| COVID-19 hospitalisation | 3-6                  | 0.05 (0.02-0.13)         | 0.11 (0.06-0.19)        | 0.42 (0.17-1.01)    | 0.08 (0.04-0.14)         | 0.18 (0.08-0.39)        | 0.71 (0.30-1.71)    |
|                          | 7-10                 | 0.05 (0.03-0.09)         | 0.10 (0.07-0.14)        | 0.42 (0.24-0.74)    | 0.10 (0.04-0.22)         | 0.10 (0.05-0.22)        | 0.77 (0.34-1.71)    |
|                          | 11-14                | 0.08 (0.06-0.11)         | 0.12 (0.10-0.16)        | 0.59 (0.45-0.79)    | 0.18 (0.11-0.29)         | 0.28 (0.18-0.44)        | 0.50 (0.35-0.71)    |
|                          | 15-18                | 0.11 (0.09-0.15)         | 0.16 (0.13-0.20)        | 0.63 (0.51-0.77)    | 0.14 (0.11-0.19)         | 0.20 (0.15-0.26)        | 0.62 (0.49-0.79)    |
|                          | 19-22                | 0.12 (0.10-0.16)         | 0.22 (0.18-0.26)        | 0.51 (0.42-0.62)    | 0.18 (0.14-0.23)         | 0.25 (0.19-0.33)        | 0.63 (0.52-0.77)    |
| 23-26                    | 0.21 (0.17-0.27)     | 0.29 (0.24-0.36)         | 0.68 (0.57-0.81)        | 0.22 (0.18-0.28)    | 0.27 (0.21-0.35)         | 0.71 (0.60-0.85)        |                     |
| COVID-19 death           | 3-6                  | -                        | -                       | -                   | 0.03 (0.01-0.08)         | -                       | -                   |
|                          | 7-10                 | -                        | 0.03 (0.01-0.09)        | -                   | -                        | -                       | -                   |
|                          | 11-14                | 0.04 (0.02-0.10)         | 0.06 (0.03-0.11)        | 0.60 (0.27-1.32)    | 0.03 (0.01-0.11)         | 0.10 (0.03-0.26)        | 0.53 (0.15-1.86)    |
|                          | 15-18                | 0.07 (0.04-0.14)         | 0.10 (0.07-0.17)        | 0.66 (0.37-1.19)    | 0.11 (0.05-0.21)         | 0.18 (0.08-0.41)        | 0.50 (0.24-1.07)    |
|                          | 19-22                | 0.08 (0.05-0.14)         | 0.12 (0.08-0.18)        | 0.63 (0.41-0.97)    | 0.13 (0.08-0.20)         | 0.13 (0.08-0.21)        | 0.72 (0.46-1.13)    |
| 23-26                    | 0.16 (0.09-0.28)     | 0.18 (0.11-0.27)         | 0.72 (0.45-1.16)        | 0.12 (0.08-0.18)    | 0.20 (0.12-0.32)         | 0.58 (0.42-0.82)        |                     |
| Positive SARS-CoV-2 test | 3-6                  | 0.28 (0.19-0.42)         | 0.55 (0.40-0.76)        | 0.71 (0.52-0.96)    | 0.14 (0.09-0.22)         | 0.38 (0.23-0.63)        | 0.61 (0.39-0.96)    |
|                          | 7-10                 | 0.41 (0.33-0.51)         | 0.79 (0.67-0.94)        | 0.52 (0.45-0.60)    | 0.34 (0.20-0.59)         | 0.52 (0.30-0.88)        | 0.79 (0.56-1.11)    |
|                          | 11-14                | 0.49 (0.42-0.57)         | 0.85 (0.74-0.96)        | 0.63 (0.58-0.68)    | 0.48 (0.35-0.65)         | 0.71 (0.53-0.94)        | 0.57 (0.49-0.66)    |
|                          | 15-18                | 0.75 (0.66-0.85)         | 1.06 (0.95-1.19)        | 0.69 (0.65-0.73)    | 0.45 (0.37-0.54)         | 0.64 (0.53-0.77)        | 0.72 (0.65-0.80)    |
|                          | 19-22                | 0.84 (0.74-0.96)         | 1.31 (1.17-1.47)        | 0.69 (0.65-0.73)    | 0.63 (0.53-0.74)         | 0.89 (0.74-1.06)        | 0.75 (0.70-0.82)    |
| 23-26                    | 1.33 (1.18-1.51)     | 1.85 (1.65-2.07)         | 0.73 (0.70-0.77)        | 0.71 (0.61-0.83)    | 0.98 (0.83-1.17)         | 0.78 (0.72-0.85)        |                     |
| Non-COVID-19 death       | 3-6                  | 0.41 (0.31-0.54)         | 0.38 (0.30-0.48)        | 0.99 (0.83-1.18)    | 0.30 (0.25-0.35)         | 0.54 (0.42-0.69)        | 0.68 (0.57-0.81)    |
|                          | 7-10                 | 0.46 (0.35-0.60)         | 0.43 (0.34-0.55)        | 1.07 (0.92-1.24)    | 0.46 (0.38-0.55)         | 0.76 (0.59-0.99)        | 0.69 (0.59-0.80)    |
|                          | 11-14                | 0.56 (0.42-0.75)         | 0.65 (0.50-0.84)        | 0.90 (0.78-1.04)    | 0.54 (0.46-0.65)         | 0.72 (0.56-0.91)        | 0.83 (0.72-0.94)    |
|                          | 15-18                | 0.51 (0.39-0.68)         | 0.62 (0.48-0.79)        | 0.88 (0.77-1.02)    | 0.52 (0.44-0.62)         | 0.74 (0.59-0.93)        | 0.77 (0.68-0.87)    |
|                          | 19-22                | 0.55 (0.42-0.73)         | 0.53 (0.42-0.68)        | 0.99 (0.86-1.13)    | 0.65 (0.54-0.78)         | 0.90 (0.70-1.16)        | 0.89 (0.78-1.02)    |
| 23-26                    | 0.61 (0.47-0.80)     | 0.62 (0.49-0.79)         | 0.99 (0.87-1.12)        | 0.62 (0.52-0.73)    | 0.87 (0.69-1.11)         | 0.84 (0.74-0.95)        |                     |
| Any SARS-CoV-2 test      | 3-6                  | 2.68 (2.58-2.79)         | 3.06 (2.95-3.18)        | 0.87 (0.86-0.88)    | 1.52 (1.45-1.59)         | 2.39 (2.26-2.53)        | 0.83 (0.82-0.85)    |
|                          | 7-10                 | 2.73 (2.63-2.84)         | 3.04 (2.94-3.16)        | 0.86 (0.85-0.88)    | 2.02 (1.92-2.12)         | 2.80 (2.64-2.97)        | 0.85 (0.83-0.87)    |
|                          | 11-14                | 2.71 (2.61-2.81)         | 3.05 (2.94-3.16)        | 0.87 (0.86-0.88)    | 2.11 (2.01-2.22)         | 2.74 (2.58-2.91)        | 0.87 (0.85-0.88)    |
|                          | 15-18                | 2.59 (2.50-2.69)         | 2.92 (2.82-3.03)        | 0.87 (0.86-0.88)    | 2.15 (2.04-2.25)         | 2.85 (2.68-3.03)        | 0.86 (0.84-0.87)    |
|                          | 19-22                | 2.79 (2.68-2.89)         | 3.15 (3.05-3.27)        | 0.87 (0.86-0.88)    | 2.18 (2.08-2.30)         | 3.01 (2.83-3.21)        | 0.86 (0.85-0.88)    |
| 23-26                    | 3.07 (2.96-3.19)     | 3.40 (3.28-3.52)         | 0.89 (0.88-0.90)        | 2.26 (2.15-2.37)    | 3.06 (2.88-3.26)         | 0.87 (0.86-0.89)        |                     |

**Supplementary Table 61: Adjusted hazard ratios for effect of vaccination (older adults).**

| Outcome                  | Weeks since 2nd dose | 65-74 years              |                         |                     | 75+ years                |                         |                     |
|--------------------------|----------------------|--------------------------|-------------------------|---------------------|--------------------------|-------------------------|---------------------|
|                          |                      | BNT162b2 vs unvaccinated | ChAdOx1 vs unvaccinated | BNT162b2 vs ChAdOx1 | BNT162b2 vs unvaccinated | ChAdOx1 vs unvaccinated | BNT162b2 vs ChAdOx1 |
| COVID-19 hospitalisation | 3-6                  | 0.05 (0.02-0.14)         | 0.13 (0.06-0.27)        | 0.41 (0.17-1.00)    | 0.08 (0.04-0.15)         | 0.18 (0.09-0.40)        | 0.73 (0.31-1.75)    |
|                          | 7-10                 | 0.05 (0.03-0.10)         | 0.11 (0.07-0.16)        | 0.41 (0.23-0.72)    | 0.09 (0.04-0.20)         | 0.12 (0.05-0.26)        | 0.79 (0.35-1.76)    |
|                          | 11-14                | 0.07 (0.05-0.10)         | 0.12 (0.09-0.15)        | 0.58 (0.44-0.78)    | 0.17 (0.10-0.31)         | 0.28 (0.17-0.45)        | 0.50 (0.35-0.71)    |
|                          | 15-18                | 0.12 (0.08-0.16)         | 0.17 (0.14-0.22)        | 0.62 (0.50-0.76)    | 0.14 (0.10-0.19)         | 0.19 (0.13-0.26)        | 0.64 (0.51-0.81)    |
|                          | 19-22                | 0.12 (0.09-0.16)         | 0.21 (0.17-0.26)        | 0.50 (0.41-0.61)    | 0.18 (0.14-0.24)         | 0.22 (0.17-0.29)        | 0.64 (0.53-0.78)    |
| 23-26                    | 0.21 (0.16-0.27)     | 0.26 (0.21-0.32)         | 0.66 (0.56-0.79)        | 0.20 (0.16-0.26)    | 0.23 (0.17-0.31)         | 0.72 (0.60-0.86)        |                     |
| COVID-19 death           | 3-6                  | -                        | -                       | -                   | 0.03 (0.01-0.08)         | -                       | -                   |
|                          | 7-10                 | -                        | 0.03 (0.01-0.10)        | -                   | -                        | -                       | -                   |
|                          | 11-14                | 0.04 (0.02-0.10)         | 0.06 (0.03-0.11)        | 0.59 (0.26-1.31)    | -                        | 0.17 (0.05-0.56)        | 0.54 (0.54-0.54)    |
|                          | 15-18                | 0.06 (0.03-0.12)         | 0.10 (0.06-0.16)        | 0.66 (0.37-1.18)    | 0.10 (0.05-0.22)         | 0.16 (0.06-0.43)        | 0.51 (0.24-1.08)    |
|                          | 19-22                | 0.08 (0.04-0.13)         | 0.12 (0.07-0.20)        | 0.62 (0.41-0.95)    | 0.12 (0.07-0.19)         | 0.12 (0.07-0.20)        | 0.72 (0.46-1.12)    |
| 23-26                    | 0.13 (0.07-0.24)     | 0.15 (0.09-0.24)         | 0.72 (0.44-1.15)        | 0.11 (0.07-0.19)    | 0.18 (0.11-0.29)         | 0.59 (0.42-0.83)        |                     |
| Positive SARS-CoV-2 test | 3-6                  | 0.26 (0.17-0.42)         | 0.48 (0.33-0.68)        | 0.71 (0.52-0.96)    | 0.12 (0.07-0.21)         | 0.36 (0.22-0.60)        | 0.62 (0.39-0.98)    |
|                          | 7-10                 | 0.36 (0.28-0.46)         | 0.73 (0.60-0.88)        | 0.52 (0.45-0.60)    | 0.28 (0.15-0.53)         | 0.45 (0.25-0.82)        | 0.79 (0.56-1.11)    |
|                          | 11-14                | 0.40 (0.34-0.48)         | 0.71 (0.61-0.82)        | 0.63 (0.58-0.68)    | 0.40 (0.29-0.57)         | 0.68 (0.50-0.93)        | 0.57 (0.49-0.66)    |
|                          | 15-18                | 0.65 (0.56-0.76)         | 0.93 (0.82-1.05)        | 0.69 (0.65-0.73)    | 0.41 (0.33-0.50)         | 0.53 (0.43-0.66)        | 0.72 (0.65-0.80)    |
|                          | 19-22                | 0.69 (0.60-0.80)         | 1.11 (0.98-1.26)        | 0.69 (0.65-0.73)    | 0.61 (0.50-0.73)         | 0.74 (0.61-0.90)        | 0.75 (0.69-0.82)    |
| 23-26                    | 1.08 (0.94-1.24)     | 1.42 (1.26-1.60)         | 0.74 (0.70-0.77)        | 0.58 (0.48-0.69)    | 0.77 (0.63-0.93)         | 0.78 (0.72-0.84)        |                     |
| Non-COVID-19 death       | 3-6                  | 0.39 (0.27-0.55)         | 0.32 (0.24-0.42)        | 0.97 (0.82-1.16)    | 0.26 (0.21-0.32)         | 0.42 (0.32-0.55)        | 0.73 (0.62-0.86)    |
|                          | 7-10                 | 0.47 (0.34-0.65)         | 0.47 (0.36-0.63)        | 1.05 (0.91-1.23)    | 0.40 (0.32-0.50)         | 0.56 (0.42-0.74)        | 0.74 (0.64-0.85)    |
|                          | 11-14                | 0.51 (0.36-0.72)         | 0.70 (0.52-0.95)        | 0.89 (0.77-1.03)    | 0.52 (0.41-0.64)         | 0.61 (0.46-0.80)        | 0.87 (0.76-0.99)    |
|                          | 15-18                | 0.49 (0.36-0.67)         | 0.66 (0.50-0.86)        | 0.87 (0.76-1.00)    | 0.49 (0.40-0.61)         | 0.58 (0.45-0.74)        | 0.81 (0.72-0.92)    |
|                          | 19-22                | 0.56 (0.40-0.77)         | 0.60 (0.45-0.79)        | 0.98 (0.86-1.12)    | 0.61 (0.49-0.76)         | 0.77 (0.58-1.01)        | 0.94 (0.82-1.07)    |
| 23-26                    | 0.56 (0.42-0.76)     | 0.73 (0.56-0.97)         | 0.98 (0.86-1.11)        | 0.58 (0.47-0.72)    | 0.75 (0.58-0.98)         | 0.88 (0.78-1.00)        |                     |
| Any SARS-CoV-2 test      | 3-6                  | 1.89 (1.81-1.98)         | 2.17 (2.09-2.26)        | 0.87 (0.86-0.88)    | 1.15 (1.09-1.21)         | 1.67 (1.57-1.77)        | 0.85 (0.83-0.86)    |
|                          | 7-10                 | 1.94 (1.86-2.03)         | 2.14 (2.06-2.22)        | 0.87 (0.86-0.88)    | 1.53 (1.45-1.62)         | 1.97 (1.85-2.10)        | 0.86 (0.85-0.88)    |
|                          | 11-14                | 1.92 (1.84-2.00)         | 2.18 (2.10-2.26)        | 0.87 (0.86-0.89)    | 1.60 (1.52-1.69)         | 1.94 (1.82-2.06)        | 0.88 (0.86-0.89)    |
|                          | 15-18                | 1.89 (1.82-1.97)         | 2.11 (2.03-2.19)        | 0.87 (0.86-0.88)    | 1.64 (1.56-1.73)         | 2.06 (1.94-2.20)        | 0.87 (0.85-0.88)    |
|                          | 19-22                | 2.02 (1.94-2.11)         | 2.27 (2.19-2.35)        | 0.88 (0.87-0.89)    | 1.67 (1.58-1.76)         | 2.19 (2.05-2.34)        | 0.87 (0.86-0.89)    |
| 23-26                    | 2.25 (2.16-2.34)     | 2.42 (2.33-2.51)         | 0.89 (0.88-0.90)        | 1.74 (1.65-1.84)    | 2.17 (2.04-2.32)         | 0.88 (0.87-0.89)        |                     |

**Supplementary Table 62: Per-comparison-period ratio of adjusted hazard ratios for effect of vaccination (older adults).**

| Outcome                  | 65-74 years              |                         |                     | 75+ years                |                         |                     |
|--------------------------|--------------------------|-------------------------|---------------------|--------------------------|-------------------------|---------------------|
|                          | BNT162b2 vs unvaccinated | ChAdOx1 vs unvaccinated | BNT162b2 vs ChAdOx1 | BNT162b2 vs unvaccinated | ChAdOx1 vs unvaccinated | BNT162b2 vs ChAdOx1 |
| COVID-19 hospitalisation | 1.36 (1.22-1.52)         | 1.25 (1.15-1.35)        | 1.06 (0.96-1.18)    | 1.18 (1.06-1.31)         | 1.06 (0.94-1.19)        | 1.06 (0.96-1.16)    |
| COVID-19 death           | 1.47 (1.07-2.01)         | 1.38 (1.12-1.70)        | 1.06 (0.80-1.39)    | 1.28 (1.02-1.60)         | 1.07 (0.75-1.53)        | 0.99 (0.69-1.43)    |
| Positive SARS-CoV-2 test | 1.32 (1.23-1.41)         | 1.22 (1.17-1.27)        | 1.06 (1.02-1.09)    | 1.29 (1.14-1.46)         | 1.14 (1.04-1.24)        | 1.06 (1.01-1.12)    |
| Non-COVID-19 death       | 1.07 (0.99-1.15)         | 1.15 (1.05-1.27)        | 1.00 (0.96-1.03)    | 1.16 (1.08-1.26)         | 1.11 (1.05-1.19)        | 1.04 (1.01-1.08)    |
| Any SARS-CoV-2 test      | 1.03 (1.01-1.05)         | 1.02 (1.00-1.04)        | 1.00 (1.00-1.01)    | 1.07 (1.02-1.12)         | 1.05 (1.03-1.07)        | 1.01 (1.00-1.01)    |

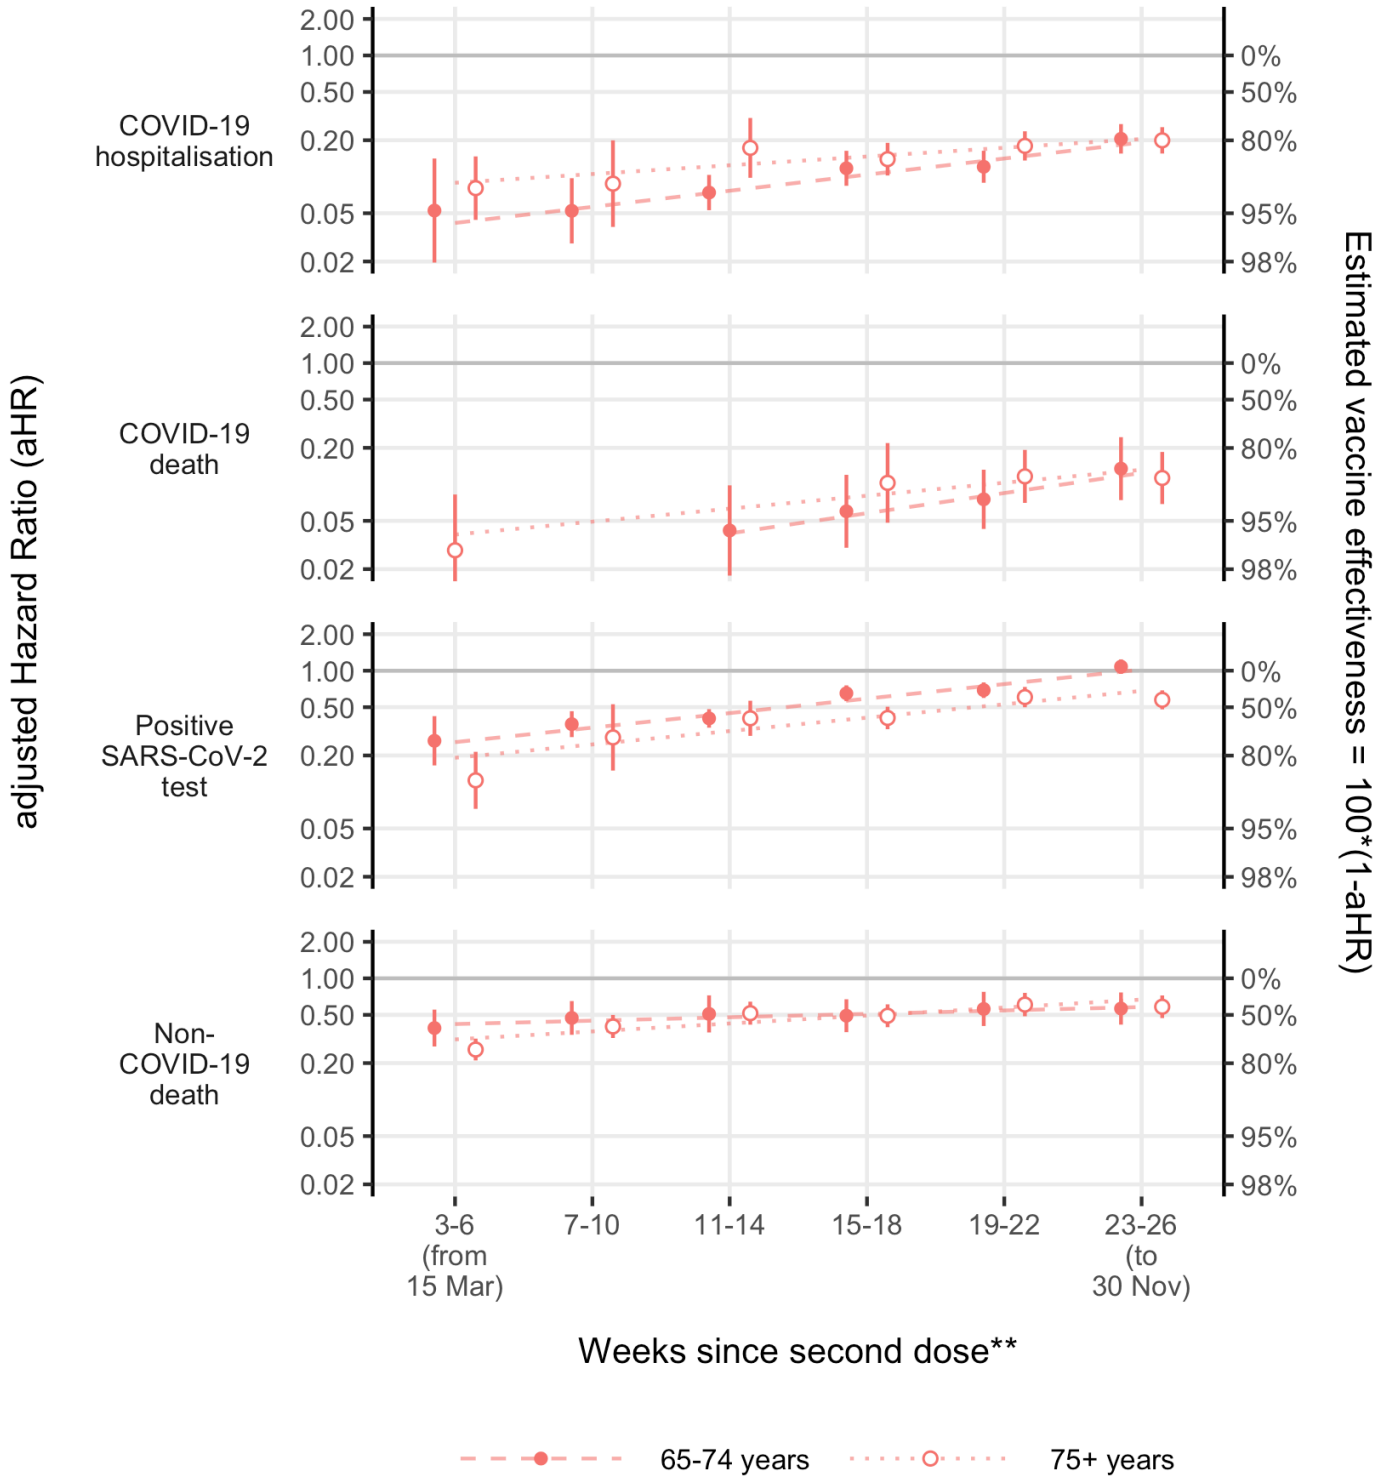

**Supplementary Figure 36:** Adjusted hazard ratios for BNT162b2 vs unvaccinated from the 65-74 years and 75+ years models.

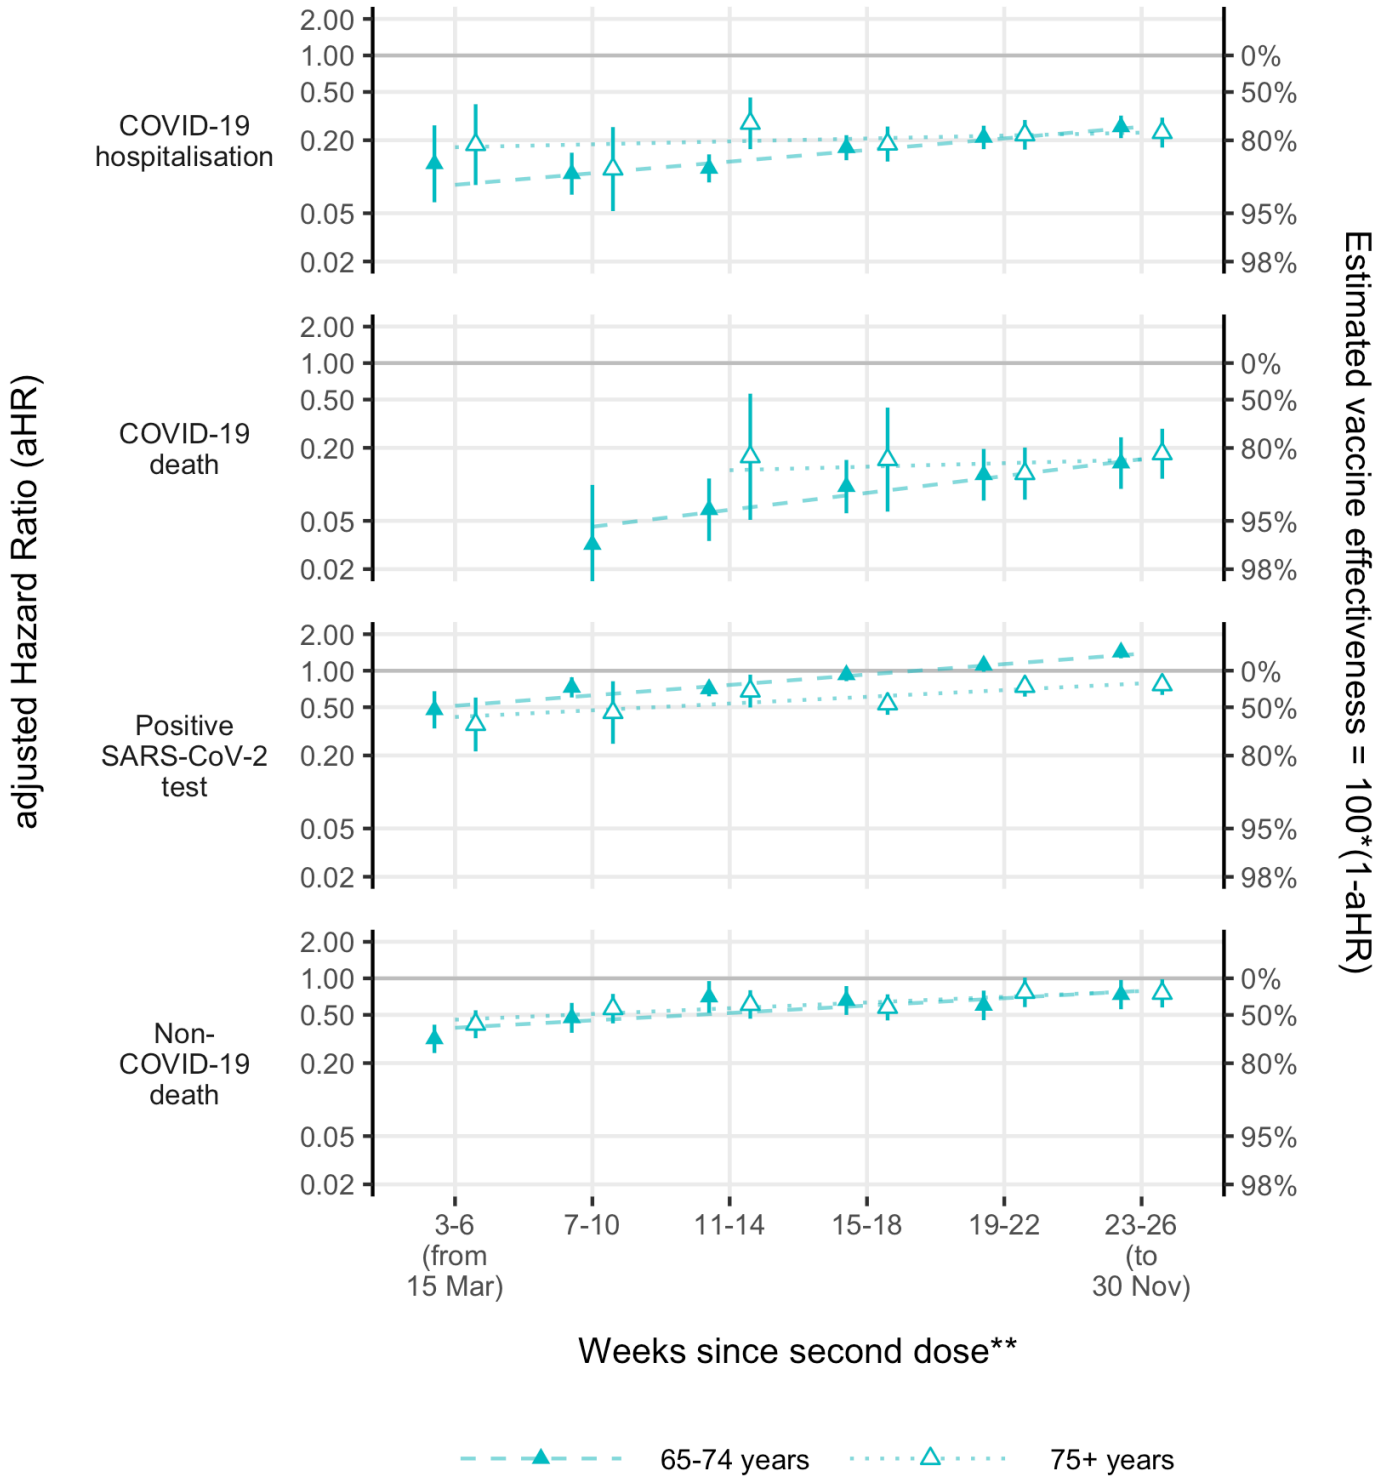

Supplementary Figure 37: Adjusted hazard ratios for ChAdOx1 vs unvaccinated from the 65-74 years and 75+ years models.



Any SARS-CoV-2 test

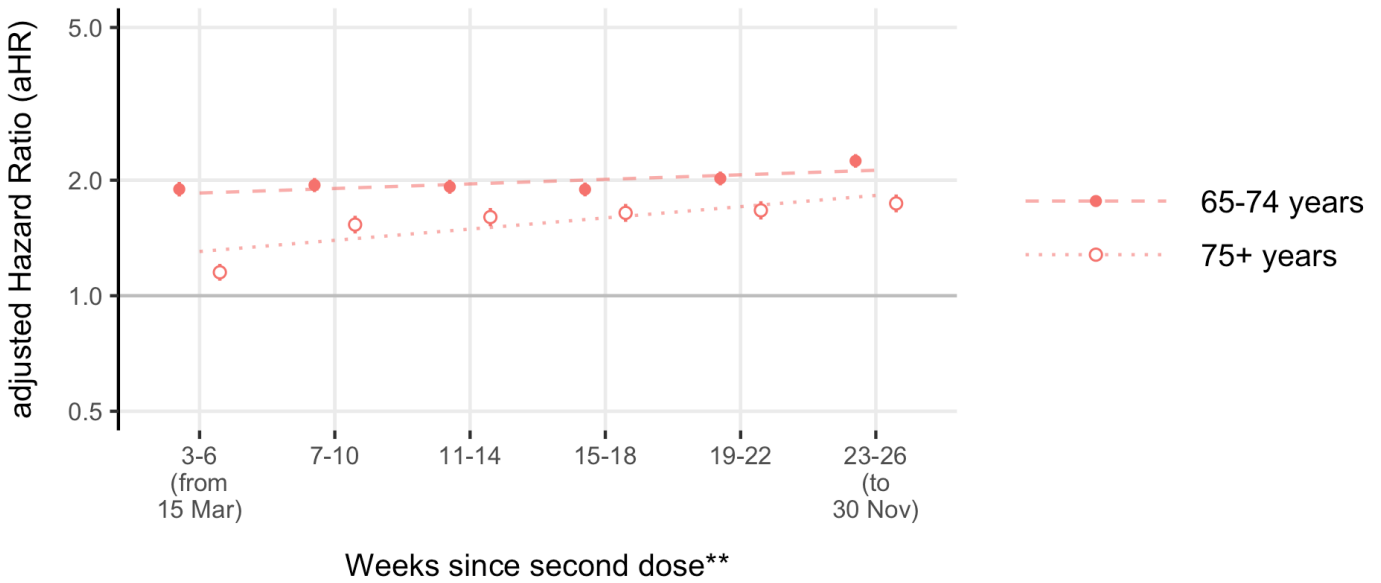

**Supplementary Figure 38:** Adjusted hazard ratios for any SARS-CoV-2 test for BNT162b2 vs unvaccinated from the 65-74 years and 75+ years models.

Any SARS-CoV-2 test

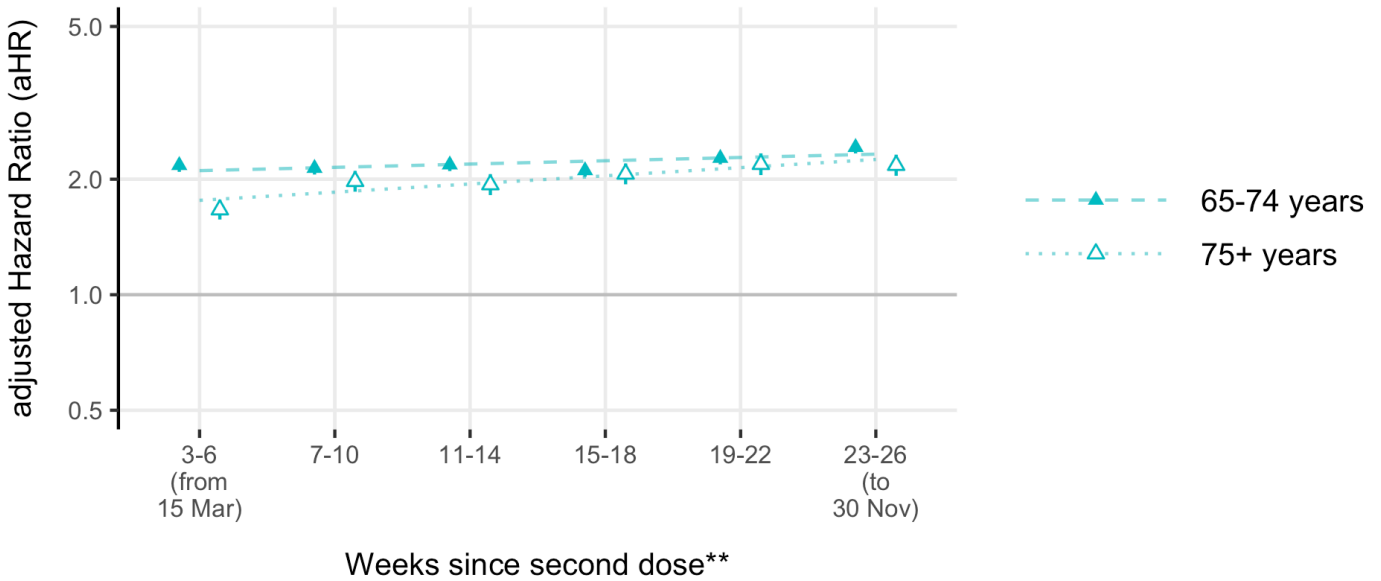

**Supplementary Figure 39:** Adjusted hazard ratios for any SARS-CoV-2 test for ChAdOx1 vs unvaccinated from the 65-74 years and 75+ years models.
